# Supplementary material for: Understanding of the C–H stretch region of infra-red spectroscopy: an analysis of the final state wavefunctions
Source: Royal Society of Chemistry journal article supplement (doi:10.1039/d0cp01157f), 2021-01-01
Supplement: d0cp01157f1.pdf [file d0cp01157f1.pdf]

**Supporting Information: Understanding of the C-H stretching region of Infra-Red spectroscopy: An analysis of the final state wavefunctions.**

Swati Yadav<sup>1</sup>, Subrata Banik<sup>2a</sup> M. Durga Prasad<sup>1b</sup>

<sup>1</sup> *School of Chemistry, University of Hyderabad, Hyderabad 500046, India and*

<sup>2</sup> *Department of Chemistry, School of Chemical and Biotechnology,  
SASTRA Deemed University, Thanjavur 613401, Tamil Nadu, India*

(Dated: October 22, 2020)

---

<sup>a</sup> subratagem@gmail.com

<sup>b</sup> mdpsc@uohyd.ac.in

Table S1. The normal modes and harmonic wavenumbers of Pyrimidine

| Mode No. | Symm.          | Description                                           | HO wavenumber |
|----------|----------------|-------------------------------------------------------|---------------|
| 1        | a <sub>1</sub> | sym. CH str.                                          | 3201.76       |
| 2        | a <sub>1</sub> | sym. CH str.                                          | 3171.68       |
| 3        | a <sub>1</sub> | sym. CH str.                                          | 3155.55       |
| 4        | a <sub>1</sub> | H-C-C ip bend <sup>1</sup> + H-C-N ip bend + C-N str. | 1607.15       |
| 5        | a <sub>1</sub> | H-C-N ip bend + H-C-C ip bend + C-H str.              | 1436.99       |
| 6        | a <sub>1</sub> | H-C-N ip bend +N-C-N ip bend                          | 1162.76       |
| 7        | a <sub>1</sub> | C-N str. + C-C str. + H-C-C ip bend                   | 1082.71       |
| 8        | a <sub>1</sub> | ring breathing                                        | 1009.62       |
| 9        | a <sub>1</sub> | N-C-N ip bend + C-C-C bend                            | 696.90        |
| 10       | a <sub>2</sub> | CH oop bend <sup>1</sup>                              | 1002.99       |
| 11       | a <sub>2</sub> | ring torsion                                          | 409.16        |
| 12       | b <sub>1</sub> | CH oop bend                                           | 1027.72       |
| 13       | b <sub>1</sub> | CH oop bend                                           | 984.19        |
| 14       | b <sub>1</sub> | CH oop bend                                           | 822.34        |
| 15       | b <sub>1</sub> | CH oop bend                                           | 737.71        |
| 16       | b <sub>1</sub> | ring torsion                                          | 351.59        |
| 17       | b <sub>2</sub> | asym. CH str.                                         | 3158.73       |
| 18       | b <sub>2</sub> | C-C str. + H-C-C ip bend                              | 1606.05       |
| 19       | b <sub>2</sub> | H-C-C ip bend + H-C-N ip bend                         | 1499.43       |
| 20       | b <sub>2</sub> | H-C-C ip bend + H-C-N ip bend                         | 1400.29       |
| 21       | b <sub>2</sub> | H-C-C ip bend + H-C-N ip bend + C-N str.              | 1250.97       |
| 22       | b <sub>2</sub> | C-C str. + C-N str.                                   | 1206.18       |
| 23       | b <sub>2</sub> | H-C-C ip bend                                         | 1094.69       |
| 24       | b <sub>2</sub> | C-C-N ip bend                                         | 637.75        |

<sup>1</sup> ip= in-plane; oop = out-of-plane

Table S2. The normal modes and harmonic wavenumbers of Thiophene

| Mode No. | Symm.          | Description                                   | HO wavenumber |
|----------|----------------|-----------------------------------------------|---------------|
| 1        | a <sub>1</sub> | sym. CH str.                                  | 3254.75       |
| 2        | a <sub>1</sub> | sym. CH str.                                  | 3215.5        |
| 3        | a <sub>1</sub> | C-C str. + H-C-C ip bend                      | 1438.74       |
| 4        | a <sub>1</sub> | H-C-C ip bend + H-C-S ip bend                 | 1395.88       |
| 5        | a <sub>1</sub> | H-C-C ip bend + H-C-S ip bend                 | 1106.56       |
| 6        | a <sub>1</sub> | C-C str.                                      | 1051.92       |
| 7        | a <sub>1</sub> | C-S str.                                      | 834.45        |
| 8        | a <sub>1</sub> | C-S-C ip bend + C-S str.                      | 613.37        |
| 9        | a <sub>2</sub> | CH oop bend                                   | 921.09        |
| 10       | a <sub>2</sub> | CH oop bend                                   | 688.53        |
| 11       | a <sub>2</sub> | ring torsion                                  | 579.08        |
| 12       | b <sub>1</sub> | CH oop bend                                   | 888.39        |
| 13       | b <sub>1</sub> | CH oop bend                                   | 722.95        |
| 14       | b <sub>1</sub> | ring torsion                                  | 462,61        |
| 15       | b <sub>2</sub> | asym. CH str.                                 | 3252.20       |
| 16       | b <sub>2</sub> | asym. CH str.                                 | 3202.12       |
| 17       | b <sub>2</sub> | C-C str. + H-C-C ip bend                      | 1549.76       |
| 18       | b <sub>2</sub> | H-C-C ip bend + H-C-S ip bend                 | 1284.56       |
| 19       | b <sub>2</sub> | H-C-C ip bend + H-C-S ip bend                 | 1106.52       |
| 20       | b <sub>2</sub> | C-C-C ip bend + H-C-S ip bend + C-C-S ip bend | 877.81        |
| 21       | b <sub>2</sub> | C-S str.                                      | 746.25        |

ip= in-plane; oop = out-of-plane

Table S3. The Cartesian coordinates (in Angstroms) of the optimized structure of pyrimidine, computed by B3LYP/6-311++G(2d,2p) method.

| Atom | X        | Y         | Z         |
|------|----------|-----------|-----------|
| C    | 0.000000 | 0.000000  | -1.308558 |
| N    | 0.000000 | 1.192933  | -0.712855 |
| C    | 0.000000 | 1.181290  | 0.621569  |
| C    | 0.000000 | 0.000000  | 1.350600  |
| C    | 0.000000 | -1.181290 | 0.621569  |
| N    | 0.000000 | -1.192933 | -0.712855 |
| H    | 0.000000 | 2.146274  | 1.115002  |
| H    | 0.000000 | 0.000000  | -2.391906 |
| H    | 0.000000 | 0.000000  | 2.430795  |
| H    | 0.000000 | -2.146274 | 1.115002  |

Table S4. The Cartesian coordinates (in Angstroms) of the optimized structure of pyrimidine-d4, computed by B3LYP/6-311++G(2d,2p) method.

| Atom | X        | Y         | Z         |
|------|----------|-----------|-----------|
| C    | 0.000000 | 0.000000  | -1.308558 |
| N    | 0.000000 | 1.192933  | -0.712855 |
| C    | 0.000000 | 1.181290  | 0.621569  |
| C    | 0.000000 | 0.000000  | 1.350600  |
| C    | 0.000000 | -1.181290 | 0.621569  |
| N    | 0.000000 | -1.192933 | -0.712855 |
| D    | 0.000000 | 2.146274  | 1.115002  |
| D    | 0.000000 | 0.000000  | -2.391906 |
| D    | 0.000000 | 0.000000  | 2.430795  |
| D    | 0.000000 | -2.146274 | 1.115002  |

Table S5. The Cartesian coordinates (in Angstroms) of the optimized structure of Thiophene, computed by B3LYP/6-311++G(2d,2p) method.

| Atom | X        | Y         | Z         |
|------|----------|-----------|-----------|
| C    | 0.000000 | 1.238795  | -0.010103 |
| C    | 0.000000 | 0.712165  | -1.268287 |
| C    | 0.000000 | -0.712165 | -1.268287 |
| C    | 0.000000 | -1.238795 | -0.010103 |
| S    | 0.000000 | 0.000000  | 1.194166  |
| H    | 0.000000 | 2.274830  | 0.280569  |
| H    | 0.000000 | 1.315107  | -2.163562 |
| H    | 0.000000 | -1.315107 | -2.163562 |
| H    | 0.000000 | -2.274830 | 0.280569  |

Table S6. The Cartesian coordinates (in Angstroms) of the optimized structure of Thiophene-d4, computed by B3LYP/6-311++G(2d,2p) method.

| Atom | X        | Y         | Z         |
|------|----------|-----------|-----------|
| C    | 0.000000 | 1.238795  | -0.010103 |
| C    | 0.000000 | 0.712165  | -1.268287 |
| C    | 0.000000 | -0.712165 | -1.268287 |
| C    | 0.000000 | -1.238795 | -0.010103 |
| S    | 0.000000 | 0.000000  | 1.194166  |
| D    | 0.000000 | 2.274830  | 0.280569  |
| D    | 0.000000 | 1.315107  | -2.163562 |
| D    | 0.000000 | -1.315107 | -2.163562 |
| D    | 0.000000 | -2.274830 | 0.280569  |

Table S7. The Cartesian coordinates (in Angstroms) of the optimized structure of pyrazine, computed by B3LYP/6-311++G(2d,2p) method.

| Atom | X        | Y         | Z         |
|------|----------|-----------|-----------|
| C    | 0.000000 | 1.131088  | 0.696090  |
| C    | 0.000000 | 1.131088  | -0.696090 |
| N    | 0.000000 | 0.000000  | -1.401268 |
| C    | 0.000000 | -1.131088 | -0.696090 |
| C    | 0.000000 | -1.131088 | 0.696090  |
| N    | 0.000000 | 0.000000  | 1.401268  |
| H    | 0.000000 | 2.060922  | 1.251864  |
| H    | 0.000000 | 2.060922  | -1.251864 |
| H    | 0.000000 | -2.060922 | -1.251864 |
| H    | 0.000000 | -2.060922 | 1.251864  |

Table S8. The Cartesian coordinates (in Angstroms) of the optimized structure of pyrazine-d4, computed by B3LYP/6-311++G(2d,2p) method.

| Atom | X        | Y         | Z         |
|------|----------|-----------|-----------|
| C    | 0.000000 | 1.131084  | 0.696090  |
| C    | 0.000000 | 1.131084  | -0.696090 |
| N    | 0.000000 | 0.000000  | -1.401261 |
| C    | 0.000000 | -1.131084 | -0.696090 |
| C    | 0.000000 | -1.131084 | 0.696090  |
| N    | 0.000000 | 0.000000  | 1.401261  |
| D    | 0.000000 | 2.060930  | 1.251843  |
| D    | 0.000000 | 2.060930  | -1.251843 |
| D    | 0.000000 | -2.060930 | -1.251843 |
| D    | 0.000000 | -2.060930 | 1.251843  |

Table S9. The Cartesian coordinates (in Angstroms) of the optimized structure of trans-butadiene, computed by B3LYP/6-311++G(2d,2p) method.

| Atom | X         | Y         | Z        |
|------|-----------|-----------|----------|
| C    | -0.325181 | 0.650343  | 0.000000 |
| C    | 0.325181  | 1.816497  | 0.000000 |
| H    | -1.410504 | 0.646518  | 0.000000 |
| H    | -0.202410 | 2.759441  | 0.000000 |
| H    | 1.407080  | 1.859005  | 0.000000 |
| C    | -0.325181 | -1.816497 | 0.000000 |
| C    | 0.325181  | -0.650343 | 0.000000 |
| H    | 0.202410  | -2.759441 | 0.000000 |
| H    | -1.407080 | -1.859005 | 0.000000 |
| H    | 1.410504  | -0.646518 | 0.000000 |

Table S10. The Cartesian coordinates (in Angstroms) of the optimized structure of trans-butadiene-d6, computed by B3LYP/6-311++G(2d,2p) method.

| Atom | X         | Y         | Z        |
|------|-----------|-----------|----------|
| C    | -0.325182 | 0.650344  | 0.000000 |
| C    | 0.325182  | 1.816498  | 0.000000 |
| D    | -1.410504 | 0.646521  | 0.000000 |
| D    | -0.202410 | 2.759442  | 0.000000 |
| D    | 1.407081  | 1.859004  | 0.000000 |
| C    | -0.325182 | -1.816498 | 0.000000 |
| C    | 0.325182  | -0.650344 | 0.000000 |
| D    | 0.202410  | -2.759442 | 0.000000 |
| D    | -1.407081 | -1.859004 | 0.000000 |
| D    | 1.410504  | -0.646521 | 0.000000 |

Table S11. The Cartesian coordinates (in Angstroms) of the optimized structure of pyridazine, computed by B3LYP/6-311++G(2d,2p) method.

| Atom | X        | Y         | Z         |
|------|----------|-----------|-----------|
| N    | 0.000000 | 0.665768  | -1.226446 |
| C    | 0.000000 | 1.320475  | -0.067334 |
| C    | 0.000000 | 0.689189  | 1.175089  |
| C    | 0.000000 | -0.689189 | 1.175089  |
| C    | 0.000000 | -1.320475 | -0.067334 |
| N    | 0.000000 | -0.665768 | -1.226446 |
| H    | 0.000000 | 1.265462  | 2.089594  |
| H    | 0.000000 | 2.399637  | -0.151001 |
| H    | 0.000000 | -1.265462 | 2.089594  |
| H    | 0.000000 | -2.399637 | -0.151001 |

Table S12. The Cartesian coordinates (in Angstroms) of the optimized structure of pyridazine-d4, computed by B3LYP/6-311++G(2d,2p) method.

| Atom | X        | Y         | Z         |
|------|----------|-----------|-----------|
| N    | 0.000000 | 0.665768  | -1.226446 |
| C    | 0.000000 | 1.320475  | -0.067334 |
| C    | 0.000000 | 0.689189  | 1.175089  |
| C    | 0.000000 | -0.689189 | 1.175089  |
| C    | 0.000000 | -1.320475 | -0.067334 |
| D    | 0.000000 | -0.665768 | -1.226446 |
| D    | 0.000000 | 1.265462  | 2.089594  |
| D    | 0.000000 | 2.399637  | -0.151001 |
| D    | 0.000000 | -1.265462 | 2.089594  |
| D    | 0.000000 | -2.399637 | -0.151001 |

## S1. PYRAZINE

Twenty four normal modes of Pyrazine are tabulated in Table S13 along with their symmetry representations, approximate physical descriptions, and harmonic wavenumbers. Out of four CH stretching fundamentals, only two are ( $9_1$  and  $15_1$ ) IR active, and they belong to  $b_{1u}$  and  $b_{2u}$  irreducible representations of the  $D_{2h}$  point group, respectively. A comparison between the experimental spectrum and the computed spectrum of the CH stretching region is presented in Figure S1. The experimental spectrum is taken from the NIST database. The calculated results are convoluted with a gaussian line shape function of  $20\text{ cm}^{-1}$  FWHM bandwidth and presented along with the stick spectrum underneath it. As can be seen, there is good agreement between the experimental spectrum and the computed one. The experimental spectrum has five bands in the CH stretching region that are spread over  $2900$  to  $3100\text{ cm}^{-1}$ . We found four bands in this region in our computation. The experimental band, labeled as 1, is reproduced by the VCCM calculation. The intensity of the computed band is overestimated as compared to the experimental one. As can be seen from the stick spectrum, this calculated band is the superposition of two medium and several low-intensity transitions. The bands 2 and 3 of the experimental spectrum have been merged into a single band in the calculated spectrum (labeled as 2). This band is the superposition of one medium and several low-intensity transitions. The band 4 of the computed spectrum mimics the band 4 of the experimental spectrum. The stick spectrum shows that this band is the superposition of one high intensity and one medium intensity transitions. The computed band 5 is a superposition of several low-intensity transitions that may be assigned as the shoulder peak 5 of the experimental spectrum. We found an additional band, marked as 0, at the lower end of the band 1 in our calculations.

The redistribution of intensities of the zeroth-order fundamental transitions over several transitions in the anharmonic calculations is observed for the Pyrazine molecule also. A total of eighteen transitions with intensities more than  $0.30\text{ km.mol}^{-1}$  are listed in table S14. The transition energies are distributed within the about  $260\text{ cm}^{-1}$  of energy region. Several transitions are clustered together within a small energy region. Such clustering of the transitions are also found in Pyrimidine and Thiophene molecule, as discussed in the main text. These clustered transitions have comparable molar extinction coefficients. For example, the transitions 2-4 of the  $b_{2u}$  representation are clustered together within  $4\text{ cm}^{-1}$  energy, between  $2951$  to  $2955\text{ cm}^{-1}$ . The molar extinction coefficients of these transitions vary between  $9.61$  to  $1.13\text{ km.mol}^{-1}$ . Similarly, the transitions 6 and 7 of the same  $b_{2u}$  representation are clustered together within  $2\text{ cm}^{-1}$ . The molar extinction coefficients of these two transitions are  $18.11$  and  $5.25\text{ km.mol}^{-1}$ , respectively.

All the four transitions of  $b_{1u}$  and fourteen transitions of  $b_{2u}$  representation borrowed intensities predominantly from  $9_1$  and  $15_1$  CH stretch chromophores, respectively. We recall that a similar situation is observed in the  $b_2$  representation of pyrimidine where all the transitions received intensities from the asymmetric CH stretch chromophore. Since it is the only primary chromophore present in this representation, the ratio of the intensity to the weight of the zeroth-order CH stretch in the final states of the transitions was found to be a constant. For the pyrazine also we find that the ratio of the intensity of a transition to the weight of the zeroth-order CH stretch fundamental ( $I_i/w_i$ ) is nearly constant for each symmetry. For example, such the ratio is about 2.4 for the transitions in  $b_{1u}$  representation. For the most intense transition of  $b_{2u}$  representation, the ( $I_i/w_i$ ) value is about 65. The value of such a ratio is also 65 for transitions 1 and 7. We note that several intense transitions (transitions 2-5 and 10) do not have  $15_1$  chromophore as the most or second most important zeroth-order state in their final wavefunctions. With a more detail analysis of these final state wavefunctions, we find that the zeroth-order  $15_1$  state appears as the third or fourth most significant zeroth-order states in these wavefunctions. The ratio of intensity to the weight of  $15_1$  fundamental is about 65 for all these transitions.

The final states of the transitions are superpositions of several zeroth-order states. In nine of these states, the weight of the most important zeroth-order state is less than 50%. Several zeroth-order states have near equal contributions in the final states of many of these transitions. Consequently, these states cannot be described by a single zeroth-order state alone. For example, in the final state of the third transition of  $b_{1u}$  representation, the most significant zeroth-order state,  $23_114_17_16_1$ , has 37% weight and the second most contributing state ( $9_1$ ) has 27% weight. Similarly, the final state of transition 2 of  $b_{2u}$  representation receives only 36% contribution from its most significant zeroth-order state  $23_111_17_15_1$  and 29% contribution from the second most important zeroth-order state  $16_12_1$ .

The final states are dominated by three or four quantum excitations for most of the transitions listed here. Nine of these transitions have a four quantum state as the most dominating configuration in their final states, and four of the states have a four quantum state as the second most contributing zeroth-order state. Four of the final states have a three quantum state as the most significant zeroth-order state.

The contribution of the primary chromophores CH stretch is significantly small in the states reported here. In all the transitions of  $b_{1u}$  representation, the primary chromophore  $9_1$  is the second most significant zeroth-order state. The highest contribution from  $9_1$  is only 27% in the final state of transition 3 of this irreducible representation. We note that the primary chromophore  $15_1$  has the most significant contribution in the final state of transition 6 of  $b_{2u}$



representation, which is only 28%. Thus, none of the transitions can be characterized as a fundamental transition.

Table S13. The normal modes and harmonic wavenumbers of Pyrazine

| Mode No. | Symm.    | Description                   | HO wavenumber |
|----------|----------|-------------------------------|---------------|
| 1        | $a_g$    | sym. CH str.                  | 3176.09       |
| 2        | $a_g$    | C-C str.                      | 1612.14       |
| 3        | $a_g$    | H-C-C ip bend + H-C-N ip bend | 1253.07       |
| 4        | $a_g$    | C-C str. + C-N str.           | 1038.99       |
| 5        | $a_g$    | C-N-C ip bend                 | 615.07        |
| 6        | $a_u$    | H-C-C oop bend                | 1005.85       |
| 7        | $a_u$    | ring torsion                  | 351.46        |
| 8        | $b_{1g}$ | H-C-C oop bend                | 944.94        |
| 9        | $b_{1u}$ | CH str.                       | 3156.26       |
| 10       | $b_{1u}$ | H-C-C ip bend + H-C-N ip bend | 1518.68       |
| 11       | $b_{1u}$ | H-C-N ip bend                 | 1164.79       |
| 12       | $b_{1u}$ | C-N-C ip bend                 | 1037.75       |
| 13       | $b_{2g}$ | H-C-C oop bend                | 993.17        |
| 14       | $b_{2g}$ | ring twisting                 | 778.40        |
| 15       | $b_{2u}$ | CH str.                       | 3170.19       |
| 16       | $b_{2u}$ | H-C-N ip bend + H-C-C ip bend | 1445.53       |
| 17       | $b_{2u}$ | C-C str. + C-N str.           | 1208.13       |
| 18       | $b_{2u}$ | C-C str. + H-C-C ip bend      | 1089.51       |
| 19       | $b_{3g}$ | CH str.                       | 3155.11       |
| 20       | $b_{3g}$ | C-N str.                      | 1575.71       |
| 21       | $b_{3g}$ | H-C-N ip bend + H-C-C ip bend | 1378.76       |
| 22       | $b_{3g}$ | C-C-N ip bend                 | 720.70        |
| 23       | $b_{3u}$ | H-C-C oop bend                | 803.61        |
| 24       | $b_{3u}$ | ring torsion                  | 433.77        |

ip= in-plane; oop = out-of-plane

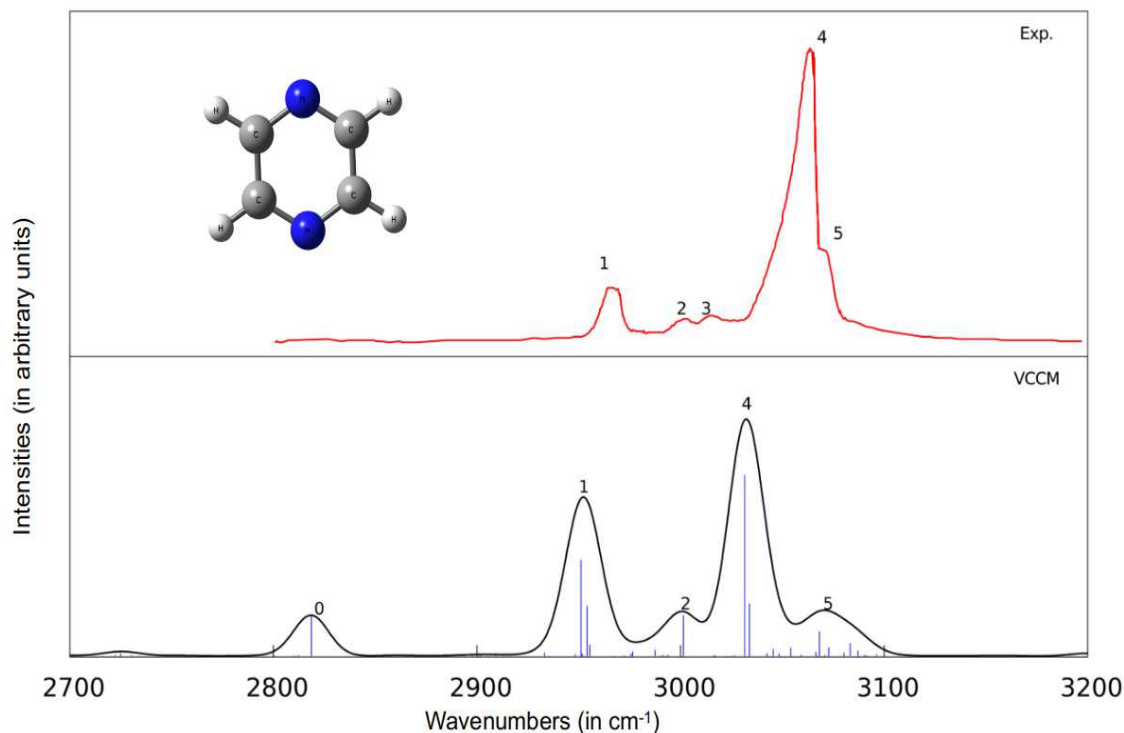

Figure S1. The CH stretching region of IR spectra of pyrazine. The VCCM spectra is convoluted with a gaussian line shape function of  $20\text{ cm}^{-1}$  FWHM, and the corresponding stick spectrum is presented along with it. The gas phase experimental spectrum is taken from NIST database.

Table S14. Some bright states of Pyrazine in the CH stretching region. Transitions with intensities more than  $0.30\text{ km.mol}^{-1}$  are tabulated.

| Symmetry | Transition no. | Excitation energy | State description                       | Intensity |
|----------|----------------|-------------------|-----------------------------------------|-----------|
| $b_{1u}$ | 1              | 2933.18           | $0.73*20_116_1+0.14*9_1$                | 0.37      |
|          | 2              | 2976.45           | $0.41*23_114_17_16_1+0.19*9_1$          | 0.44      |
|          | 3              | 2987.47           | $0.37*23_114_17_16_1-0.27*9_1$          | 0.61      |
|          | 4              | 3066.39           | $0.53*10_12_1-0.18*9_1$                 | 0.42      |
| $b_{2u}$ | 1              | 2818.63           | $0.82*21_110_1-0.06*15_1$               | 3.99      |
|          | 2              | 2951.07           | $0.36*23_111_17_15_1+0.29*16_12_1$      | 9.61      |
|          | 3              | 2954.12           | $0.55*23_111_17_15_1-0.20*16_12_1$      | 5.01      |
|          | 4              | 2955.38           | $0.45*22_112_13_1-0.35*22_112_15_2$     | 1.13      |
|          | 5              | 3001.43           | $0.63*20_110_1-0.16*16_12_1$            | 4.07      |
|          | 6              | 3031.57           | $0.28*15_1+0.16*20_110_1$               | 18.11     |
|          | 7              | 3033.82           | $0.63*13_111_18_1-0.08*15_1$            | 5.25      |
|          | 8              | 3045.42           | $0.46*24_123_117_15_1-0.28*16_15_14_1$  | 0.67      |
|          | 9              | 3054.07           | $0.89*14_18_27_1-0.01*15_1$             | 0.84      |
|          | 10             | 3068.23           | $0.36*23_121_113_1-0.23*23_213_17_1$    | 2.46      |
|          | 11             | 3072.77           | $0.73*23_120_114_1-0.09*23_121_113_1$   | 0.87      |
|          | 12             | 3080.28           | $0.63*22_111_15_2+0.15*21_111_15_1$     | 0.32      |
|          | 13             | 3083.33           | $0.29*24_123_28_1-0.19*23_213_17_1$     | 1.30      |
|          | 14             | 3087.11           | $0.43*24_123_28_1+0.13*23_122_117_17_1$ | 0.53      |

## S2. TRANS-BUTADIENE

Trans-butadiene is an open-chain molecule in our analysis. Twenty four normal modes span as  $9a_g+4a_u+3b_g+8b_u$  in the irreducible representation of  $C_{2h}$  point group. The approximate descriptions of the normal modes, symmetry representations, and the harmonic wavenumbers are presented in table S15. Out of six CH stretch fundamentals, only three are IR active and they all belong to  $b_u$  representation.

The experimental spectrum of the CH stretch region is compared with the computed spectrum by the VCCM method in figure S2. The computed spectrum is convoluted with  $20\text{ cm}^{-1}$  gaussian bandwidth. We presented the stick spectrum underneath of the convoluted spectrum for comparison. Overall, the experimental spectrum is fairly well reproduced by the VCCM. The experimental spectrum is broad, spans over  $2950$  to  $3150\text{ cm}^{-1}$  region, and has seven bands. We found several transitions in this region, as reported in the stick spectrum. With  $20\text{ cm}^{-1}$  bandwidth, these transitions generate six bands. The experimental band, labeled as 1, is simulated as band 1 in the VCCM calculations. However, the intensity of the computed band is significantly underestimated. The band 2 of the computed spectrum represents the band 2 of the experimental spectrum. This band is the superposition of one high-intensity transition and several medium and low-intensity transitions. The band 6 and 7 of the experimental spectrum are merged into one band (labeled as 5) in the anharmonic calculations.

The intensities of three CH stretch fundamentals are distributed over several transitions in the small energy region, and this leads to a broad structure of the experimental spectrum in the CH stretch region. There are as many as thirty-four transitions with intensity more than  $0.30\text{ km.mol}^{-1}$ . These transitions are listed in table S16. These transitions span over  $190\text{ cm}^{-1}$  of energy.

The general features of the transitions in the CH stretch region of this molecule are similar to the other molecules under study. Here also, we found clustering of several transitions within the small energy region, and the clustered transitions have comparable molar extinction coefficients. For example, the transitions 7-11 are clustered together within  $8\text{ cm}^{-1}$ , between  $2958$  to  $2966\text{ cm}^{-1}$ . The molar extinction coefficients of these transitions vary between  $0.45$  to  $2.79\text{ km.mol}^{-1}$ .

Several zeroth-order states have significant contributions in the final state wavefunctions of the transitions in the CH stretch region. In twenty-five out of thirty-four transitions, the most significant zeroth-order states have less than 50% weight in their final states. Several zeroth-order states have near equal contributions in the final states of these transitions, implying that these states can not be described by a single zeroth-order state alone. For example, for the transition 2, both the most significant zeroth-order state ( $14_112_15_1$ ) and the second most important zeroth-order state ( $20_113_112_19_1$ ) have only 14% weight. Several other zeroth-order states constitute the rest of 72% of the wavefunction.

Like other molecules in this study, the final states of the transitions are mostly dominated by three and/or four quantum zeroth-order states. The contributions of the primary CH chromophores are significantly small in these transitions, and they mix strongly with three and/or four quantum states due to near degeneracy. The maximum contribution from the primary chromophore is found in transition 6, where  $19_1$  has only 24% weight in the final state. Notably, this is the most intense transition reported here. The second most important zeroth-order state of the final state of this transition is a four quantum state ( $16_115_114_113_1$ ) with 13% weight. The chromophore  $18_1$  is not the most significant zeroth-order state in the final state any of the transitions. It is the second most significant zeroth-order state in the final state of transition 14 with 13% weight. The most important zeroth-order state of the final state of this transition is a four quantum state ( $16_114_213_1$ ) and it has 27% weight. The primary chromophore  $17_1$  is the most significant zeroth-order state in the final state of transition 28, and its weight is only 21%. The second most contributing zeroth-order state is again a four quantum state ( $24_18_3$ ) with 15% weight in the final state of this transition.

Table S15. The normal modes and harmonic wavenumbers of trans-butadiene

| Mode No. | Symm. | Description    | HO wavenumber |
|----------|-------|----------------|---------------|
| 1        | $a_g$ | sym. CH str.   | 3225.98       |
| 2        | $a_g$ | sym. CH str.   | 3141.91       |
| 3        | $a_g$ | sym. CH str.   | 3130.46       |
| 4        | $a_g$ | C=C str.       | 1698.03       |
| 5        | $a_g$ | CH2 scis.      | 1481.68       |
| 6        | $a_g$ | H-C-C ip bend  | 1319.62       |
| 7        | $a_g$ | C-C str.       | 1229.77       |
| 8        | $a_g$ | CH2 rock       | 900.39        |
| 9        | $a_g$ | C-C-C ip bend  | 519.29        |
| 10       | $a_u$ | H-C-C oop bend | 1053.02       |
| 11       | $a_u$ | H-C-C oop bend | 941.12        |
| 12       | $a_u$ | H-C-C oop bend | 538.56        |
| 13       | $a_u$ | CCC deform     | 172.96        |
| 14       | $b_g$ | H-C-C oop bend | 1000.01       |
| 15       | $b_g$ | H-C-C oop bend | 940.27        |
| 16       | $b_g$ | H-C-C oop bend | 779.07        |
| 17       | $b_u$ | asym. CH str.  | 3226.37       |
| 18       | $b_u$ | asym. CH str.  | 3143.18       |
| 19       | $b_u$ | asym. CH str.  | 3139.30       |
| 20       | $b_u$ | C=C str.       | 1647.75       |
| 21       | $b_u$ | CH2 scis.      | 1420.50       |
| 22       | $b_u$ | H-C-C ip bend  | 1327.12       |
| 23       | $b_u$ | CH2 rock       | 1010.36       |
| 24       | $b_u$ | C-C-C ip bend  | 298.89        |

ip= in plane; oop = out-of-plane

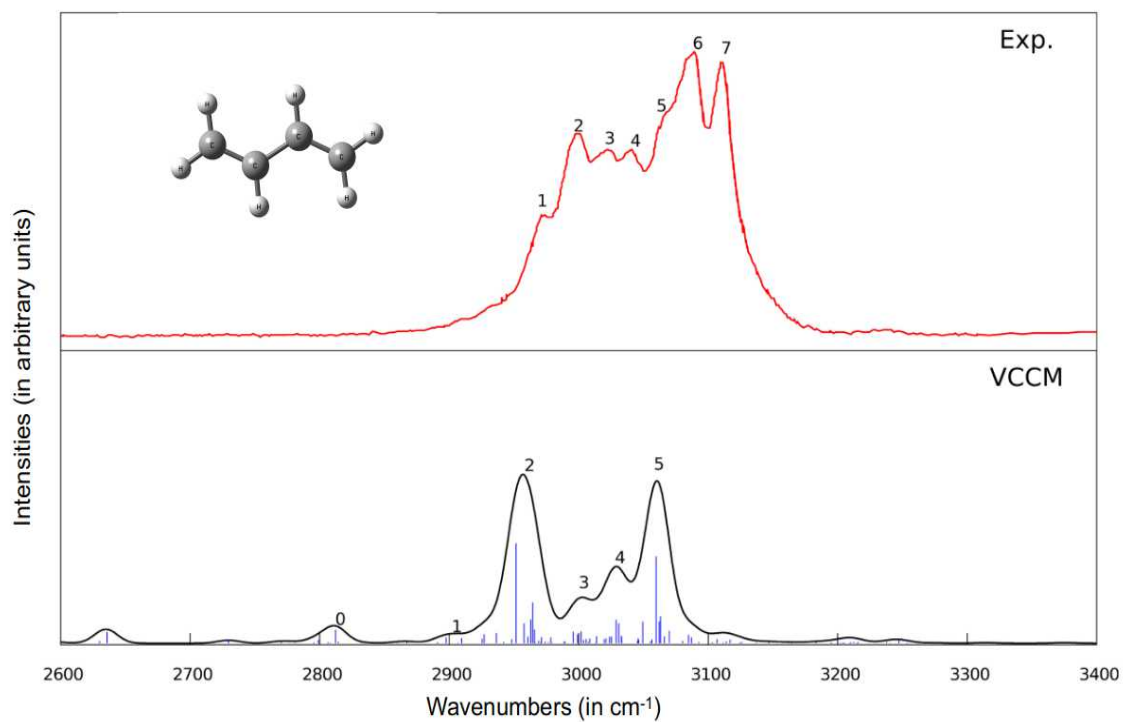

Figure S2. The CH stretching region of IR spectra of trans-butadiene. The VCCM spectra is convoluted with a gaussian line shape function of  $20\text{ cm}^{-1}$  FWHM, and the corresponding stick spectrum is presented along with it. The gas phase experimental spectrum is taken from NIST database.

Table S16. Some bright states of trans-butadiene in the CH stretching region. Transitions with intensities more than 0.30  $\text{km.mol}^{-1}$  are tabulated here.

| Symmetry | Transition no. | Excitation energy | State description                             | Intensity |
|----------|----------------|-------------------|-----------------------------------------------|-----------|
| $b_u$    | 1              | 2897.69           | $0.46*21_112_110_1 - 0.27*24_112_110_18_1$    | 0.38      |
|          | 2              | 2909.64           | $0.14*14_112_15_1 + 0.14*20_113_112_19_1$     | 0.35      |
|          | 3              | 2925.34           | $0.45*23_114_2 - 0.09*14_112_15_1$            | 0.30      |
|          | 4              | 2927.11           | $0.37*22_14_1 + 0.09*20_16_1$                 | 0.62      |
|          | 5              | 2936.44           | $0.38*24_17_15_1 - 0.11*22_14_1$              | 0.70      |
|          | 6              | 2951.58           | $0.24*19_1 + 0.13*16_115_114_113_1$           | 6.82      |
|          | 7              | 2957.84           | $0.67*16_113_19_15_1 - 0.05*19_1$             | 1.35      |
|          | 8              | 2960.86           | $0.25*22_116_115_1 + 0.22*24_221_8_1$         | 0.45      |
|          | 9              | 2962.88           | $0.41*24_221_8_1 - 0.22*22_116_115_1$         | 1.62      |
|          | 10             | 2964.41           | $0.23*16_110_17_1 + 0.15*16_111_6_1$          | 2.79      |
|          | 11             | 2965.81           | $0.41*16_110_17_1 - 0.16*16_115_114_113_1$    | 0.95      |
|          | 12             | 2971.33           | $0.50*15_113_19_16_1 - 0.21*22_113_26_1$      | 0.41      |
|          | 13             | 2978.40           | $0.50*24_123_114_112_1 + 0.07*20_112_111_1$   | 0.39      |
|          | 14             | 2995.83           | $0.27*16_114_213_1 - 0.13*18_1$               | 0.79      |
|          | 15             | 2999.06           | $0.73*14_113_18_2 - 0.07*18_1$                | 0.61      |
|          | 16             | 3001.84           | $0.31*16_114_213_1 + 0.09*18_1$               | 0.81      |
|          | 17             | 3008.44           | $0.29*16_113_111_10_1 - 0.13*16_312_1$        | 0.32      |
|          | 18             | 3013.86           | $0.55*22_19_17_1 + 0.09*23_113_112_17_1$      | 0.48      |
|          | 19             | 3021.18           | $0.57*23_110_2 + 0.23*22_116_114_1$           | 0.33      |
|          | 20             | 3023.88           | $0.73*23_216_113_1 + 0.07*24_16_15_1$         | 0.46      |
|          | 21             | 3025.38           | $0.35*24_16_15_1 - 0.20*23_216_113_1$         | 0.46      |
|          | 22             | 3028.93           | $0.25*15_111_17_1 - 0.14*24_16_15_1$          | 1.61      |
|          | 23             | 3030.93           | $0.43*15_111_17_1 + 0.07*23_113_112_17_1$     | 1.36      |
|          | 24             | 3032.93           | $0.38*24_113_110_15_1 + 0.13*24_116_114_18_1$ | 0.51      |
|          | 25             | 3033.20           | $0.27*21_14_1 - 0.21*24_113_110_15_1$         | 0.40      |
|          | 26             | 3045.99           | $0.63*24_122_116_112_1 - 0.13*14_112_19_18_1$ | 0.33      |
|          | 27             | 3049.44           | $0.39*20_15_1 - 0.15*14_112_19_18_1$          | 1.47      |
|          | 28             | 3059.81           | $0.21*17_1 - 0.15*24_18_3$                    | 5.93      |
|          | 29             | 3062.29           | $0.47*24_18_3 - 0.11*24_121_2$                | 1.49      |
|          | 30             | 3063.18           | $0.29*24_121_2 + 0.24*21_116_115_1$           | 1.82      |
|          | 31             | 3066.25           | $0.49*22_18_2 - 0.07*24_19_18_16_1$           | 0.46      |
|          | 32             | 3069.90           | $0.36*23_113_111_18_1 - 0.16*15_113_111_2$    | 0.86      |
|          | 33             | 3084.78           | $0.74*24_120_115_113_1 + 0.07*23_18_17_1$     | 0.58      |
|          | 34             | 3087.16           | $0.43*16_112_210_1 - 0.14*20_112_110_1$       | 0.40      |

### S3. PYRIDAZINE

Twenty four normal modes of Pyridazine span as  $9a_1 + 4a_2 + 3b_1 + 8b_2$  in the irreducible representations of  $C_{2v}$  point group. The approximate descriptions of the normal modes, symmetry representations, and the harmonic wavenumbers are presented in table S17. All the CH stretch are IR active. The comparison between the experimental spectrum and the computed spectrum is presented in figure S3. The experimental spectrum is taken from the NIST database. The experimental spectrum is in the liquid phase while the computation assumes the gas phase at absolute temperature. Thus, the comparison between them is not very apt since the intermolecular interactions that affect the bandwidth significantly are not considered here. Despite that, the computed spectrum described the experimental spectrum fairly well.

Four transitions of  $a_1$  representation and nine transitions of  $b_2$  representation that have molar extinction coefficient values more than  $0.30 \text{ km.mol}^{-1}$  are listed in table S18. The transitions of  $a_1$  representation receive intensities from zeroth-order  $1_1$  and  $2_1$  fundamentals, and transitions of the  $b_2$  representation receive intensities from  $17_1$  and  $18_1$  fundamentals, respectively. These transitions are spread over about  $190 \text{ cm}^{-1}$  energy range between 2947 to  $3132 \text{ cm}^{-1}$ .

The strong mixing of the multi-quantum zeroth-order states with the CH stretch fundamentals due to near degeneracy leads to extensive intensity redistribution from the CH stretching fundamentals to several other transitions in the anharmonic description. In the many-body description of the wave-functions of the final states of these transitions, the weights of the zeroth-order CH stretch fundamentals are significantly small and they mix strongly with multi-quantum zeroth-order states. Consequently, the multi-quantum zeroth-order states have significant weights in these functions. None of these final states has more than 50% contribution from any of the zeroth-order CH stretch fundamental, implying that none of the transitions can strictly be termed as the fundamental transition. For example,  $1_1$  state is the most significant zeroth-order state in the final state of transition 1 of  $a_1$  representation. However, its weight is only 26%. It is the second most important zeroth-order state of the other three transitions. The total weight of  $1_1$  fundamental in all these four final states is 55%. The rest 45% of this zeroth-order state are distributed over several final states and each will receive small intensity from the  $1_1$  fundamental. None of the transition tabulated here has  $2_1$  fundamental as the most important configuration. It is the second most important zeroth-order state in the final state of transition 1 with 17% weight. We note that the harmonic intensity of  $1_1$  is about 1000 times more than  $2_1$ , and thus the transitions of  $a_1$  irreducible representation receive intensities mainly from  $1_1$  fundamental.

Such features of the many-body wave-functions of the final states of the transitions are persistent for  $b_2$  representation as well. Only for the final state of transition 7, the primary chromophore  $17_1$  is the most important configuration with 37% weight. Consequently, this is the most intense transition of this representation. None of the transition has  $18_1$  as the most or second most significant state in their final state wave-functions.

The final states of most of the transitions tabulated here have a four quantum or three quantum zeroth-order state as the most or the second most important zeroth-order states. The weight of these states is usually small (less than half) in all most all the transitions reported here. Consequently, these state cannot be assigned by a single zeroth-order state in the accurate description.

Table S17. The normal modes and harmonic wave-numbers of Pyridazine

| Mode No. | Symm.          | Description                                         | HO wavenumber |
|----------|----------------|-----------------------------------------------------|---------------|
| 1        | a <sub>1</sub> | sym. CH str.                                        | 3200.70       |
| 2        | a <sub>1</sub> | sym. CH str.                                        | 3175.15       |
| 3        | a <sub>1</sub> | C-C str. + H-C-C ip bend                            | 1608.51       |
| 4        | a <sub>1</sub> | H-C-N ip bend + H-C-C ip bend                       | 1481.59       |
| 5        | a <sub>1</sub> | H-C-C ip bend                                       | 1177.35       |
| 6        | a <sub>1</sub> | C-N str. + N-N str. + H-C-C ip bend                 | 1173.32       |
| 7        | a <sub>1</sub> | N-N str + C-C str. + H-C-C ip bend                  | 1089.18       |
| 8        | a <sub>1</sub> | N-N str + C-C str.                                  | 1005.92       |
| 9        | a <sub>1</sub> | N-C-C ip bend                                       | 682.93        |
| 10       | a <sub>2</sub> | H-C-C oop bend                                      | 1018.23       |
| 11       | a <sub>2</sub> | H-C-C oop bend                                      | 942.76        |
| 12       | a <sub>2</sub> | H-C-C oop bend + H-C-N oop bend                     | 773.45        |
| 13       | a <sub>2</sub> | ring torsion                                        | 376.36        |
| 14       | b <sub>1</sub> | H-C-C oop bend                                      | 984.70        |
| 15       | b <sub>1</sub> | H-C-C oop bend                                      | 760.71        |
| 16       | b <sub>1</sub> | ring torsion                                        | 374.69        |
| 17       | b <sub>2</sub> | asym. CH str.                                       | 3187.76       |
| 18       | b <sub>2</sub> | asym. CH str.                                       | 3170.55       |
| 19       | b <sub>2</sub> | C-N str. + C-C str. + H-C-N ip bend + H-C-C ip bend | 1602.53       |
| 20       | b <sub>2</sub> | H-C-C ip bend                                       | 1446.62       |
| 21       | b <sub>2</sub> | H-C-N ip bend + H-C-C ip bend                       | 1314.98       |
| 22       | b <sub>2</sub> | H-C-C ip bend                                       | 1086.60       |
| 23       | b <sub>2</sub> | C-N-N ip bend + C-C-C ip bend + H-C-C ip bend       | 1062.87       |
| 24       | b <sub>2</sub> | C-C-C ip bend + C-C-N ip bend                       | 637.32        |

ip= in-plane; oop = out-of-plane

Table S18. Some bright states of pyridazine in the CH stretching region. Transitions with intensities more than 0.30 km.mol<sup>-1</sup> are tabulated.

| Symmetry       | Transition no. | Excitation energy | State description                                                                                                          | Intensity |
|----------------|----------------|-------------------|----------------------------------------------------------------------------------------------------------------------------|-----------|
| a <sub>1</sub> | 1              | 3033.94           | 0.26*1 <sub>1</sub> +0.17*2 <sub>1</sub>                                                                                   | 2.33      |
|                | 2              | 3037.12           | 0.61*24 <sub>1</sub> 21 <sub>1</sub> 6 <sub>1</sub> +0.09*1 <sub>1</sub>                                                   | 0.71      |
|                | 3              | 3046.37           | 0.22*15 <sub>2</sub> 3 <sub>1</sub> -0.19*1 <sub>1</sub>                                                                   | 1.32      |
|                | 4              | 3131.68           | 0.80*3 <sub>2</sub> +0.06*1 <sub>1</sub>                                                                                   | 0.30      |
| b <sub>2</sub> | 1              | 2946.77           | 0.46*14 <sub>1</sub> 13 <sub>1</sub> 12 <sub>2</sub> +0.13*20 <sub>1</sub> 3 <sub>1</sub>                                  | 0.44      |
|                | 2              | 2948.55           | 0.38*20 <sub>1</sub> 3 <sub>1</sub> -0.18*14 <sub>1</sub> 13 <sub>1</sub> 12 <sub>2</sub>                                  | 0.89      |
|                | 3              | 2959.06           | 0.34*24 <sub>1</sub> 13 <sub>1</sub> 12 <sub>1</sub> 5 <sub>1</sub> -0.09*15 <sub>1</sub> 12 <sub>1</sub> 4 <sub>1</sub>   | 0.34      |
|                | 4              | 2970.82           | 0.28*16 <sub>1</sub> 10 <sub>1</sub> 3 <sub>1</sub> +0.12*19 <sub>1</sub> 4 <sub>1</sub>                                   | 1.63      |
|                | 5              | 2977.82           | 0.18*19 <sub>1</sub> 13 <sub>1</sub> 10 <sub>1</sub> -0.14*16 <sub>1</sub> 15 <sub>1</sub> 14 <sub>1</sub> 12 <sub>1</sub> | 0.72      |
|                | 6              | 3050.28           | 0.51*24 <sub>1</sub> 8 <sub>1</sub> 4 <sub>1</sub> -0.14*24 <sub>1</sub> 23 <sub>1</sub> 14 <sub>1</sub> 13 <sub>1</sub>   | 0.56      |
|                | 7              | 3062.56           | 0.37*17 <sub>1</sub> -0.18*19 <sub>1</sub> 4 <sub>1</sub>                                                                  | 11.48     |
|                | 8              | 3086.33           | 0.24*15 <sub>1</sub> 11 <sub>1</sub> 4 <sub>1</sub> -0.22*16 <sub>1</sub> 15 <sub>2</sub> 10 <sub>1</sub>                  | 0.54      |
|                | 9              | 3088.63           | 0.33*16 <sub>1</sub> 15 <sub>1</sub> 210 <sub>1</sub> +0.16*15 <sub>1</sub> 11 <sub>1</sub> 4 <sub>1</sub>                 | 0.82      |



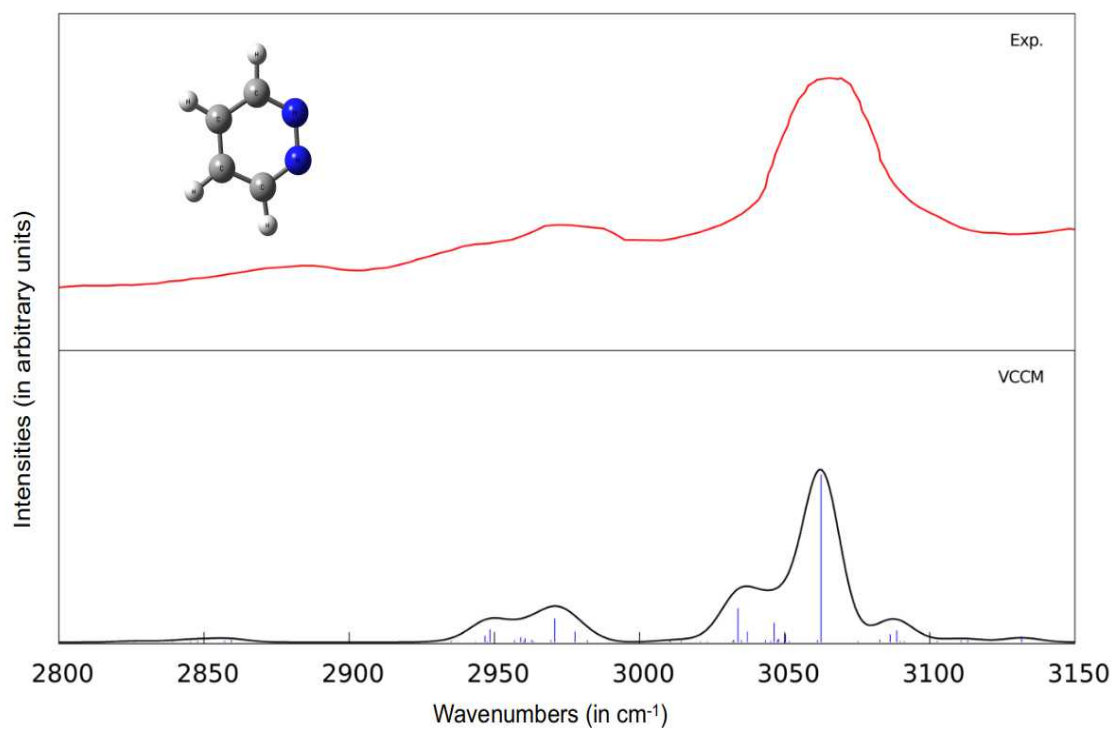

Figure S3. The CH stretching region of IR spectra of pyridazene. The VCCM spectra is convoluted with a gaussian line shape function of 15 cm<sup>-1</sup> FWHM, and the corresponding stick spectrum is presented along with it. The liquid phase experimental spectrum is taken from NIST database.

Table S19. Transitions in the CD stretching region of pyrimidine-d4. Transitions with intensities more than 0.50 km.mol<sup>-1</sup> are tabulated here.

| Symmetry       | Transition no. | Excitation energy | State description                                                                                         | Intensity |
|----------------|----------------|-------------------|-----------------------------------------------------------------------------------------------------------|-----------|
| a <sub>1</sub> | 1              | 2238.95           | 0.40*21 <sub>1</sub> 13 <sub>1</sub> 11 <sub>1</sub> -0.11*22 <sub>1</sub> 19 <sub>1</sub>                | 0.79      |
|                | 2              | 2242.50           | 0.81*24 <sub>1</sub> 13 <sub>1</sub> 10 <sub>1</sub> +0.05*15 <sub>1</sub> 13 <sub>1</sub> 8 <sub>1</sub> | 0.61      |
|                | 3              | 2244.85           | 0.46*3 <sub>1</sub> -0.17*7 <sub>1</sub> 5 <sub>1</sub>                                                   | 11.70     |
|                | 4              | 2256.97           | 0.58*7 <sub>1</sub> 5 <sub>1</sub> +0.13*3 <sub>1</sub>                                                   | 2.31      |
|                | 5              | 2274.39           | 0.34*2 <sub>1</sub> -0.25*14 <sub>1</sub> 13 <sub>1</sub> 11 <sub>2</sub>                                 | 3.11      |
|                | 6              | 2275.86           | 0.31*14 <sub>1</sub> 13 <sub>1</sub> 11 <sub>2</sub> +0.19*2 <sub>1</sub>                                 | 0.81      |
|                | 7              | 2289.94           | 0.70*1 <sub>1</sub> +0.06*23 <sub>1</sub> 18 <sub>1</sub>                                                 | 5.79      |
| b <sub>2</sub> | 1              | 2253.91           | 0.56*24 <sub>1</sub> 9 <sub>1</sub> 7 <sub>1</sub> -0.26*17 <sub>1</sub>                                  | 5.09      |
|                | 2              | 2255.15           | 0.31*24 <sub>1</sub> 9 <sub>1</sub> 7 <sub>1</sub> -0.29*24 <sub>2</sub> 21 <sub>1</sub>                  | 3.73      |
|                | 3              | 2256.28           | 0.64*24 <sub>2</sub> 21 <sub>1</sub> -0.11*13 <sub>1</sub> 11 <sub>1</sub> 6 <sub>1</sub>                 | 1.62      |
|                | 4              | 2258.35           | 0.43*13 <sub>1</sub> 11 <sub>1</sub> 6 <sub>1</sub> +0.19*17 <sub>1</sub>                                 | 3.70      |
|                | 5              | 2316.95           | 0.73*21 <sub>1</sub> 5 <sub>1</sub> -0.11*12 <sub>1</sub> 10 <sub>1</sub> 9 <sub>1</sub>                  | 0.90      |
|                | 6              | 2448.00           | 0.57*20 <sub>1</sub> 5 <sub>1</sub> - 0.13*13 <sub>1</sub> 11 <sub>1</sub> 5 <sub>1</sub>                 | 0.58      |

Table S20. Some bright states of thiophene-d4 in the CD stretching region. Transitions with intensities more than 0.10 km.mol<sup>-1</sup> are tabulated.

| Symmetry       | Transition no. | Excitation energy | State description                                                                        | Intensity |
|----------------|----------------|-------------------|------------------------------------------------------------------------------------------|-----------|
| a <sub>1</sub> | 1              | 2290.68           | 0.40*14 <sub>1</sub> 13 <sub>1</sub> 8 <sub>1</sub> 7 <sub>1</sub> +0.28*2 <sub>1</sub>  | 0.20      |
|                | 2              | 2290.91           | 0.56*14 <sub>1</sub> 13 <sub>1</sub> 8 <sub>1</sub> 7 <sub>1</sub> -0.23*2 <sub>1</sub>  | 0.16      |
|                | 3              | 2323.02           | 0.23*20 <sub>1</sub> 14 <sub>1</sub> 10 <sub>1</sub> 8 <sub>1</sub> +0.17*1 <sub>1</sub> | 0.19      |
|                | 4              | 2328.84           | 0.28*11 <sub>2</sub> 10 <sub>1</sub> 9 <sub>1</sub> +0.23*1 <sub>1</sub>                 | 0.21      |
|                | 5              | 2333.56           | 0.32*14 <sub>1</sub> 13 <sub>1</sub> 10 <sub>1</sub> 9 <sub>1</sub> -0.28*1 <sub>1</sub> | 0.29      |
| b <sub>2</sub> | 1              | 2281.13           | 0.70*16 <sub>1</sub> +0.03*18 <sub>1</sub> 3 <sub>1</sub>                                | 1.14      |

Table S21. Some bright states of trans-butadiene-D6 in the CD stretching region. Transitions with intensities more than 0.30 km.mol<sup>-1</sup> are tabulated here.

| Symmetry       | Transition no. | Excitation energy | State description                                                                                                           | Intensity |
|----------------|----------------|-------------------|-----------------------------------------------------------------------------------------------------------------------------|-----------|
| b <sub>u</sub> | 1              | 2190.70           | 0.80*24 <sub>1</sub> 15 <sub>2</sub> 9 <sub>1</sub> - 0.04*22 <sub>1</sub> 9 <sub>1</sub> 8 <sub>1</sub>                    | 0.33      |
|                | 2              | 2191.91           | 0.31*22 <sub>1</sub> 9 <sub>1</sub> 8 <sub>1</sub> - 0.21*19 <sub>1</sub>                                                   | 1.68      |
|                | 3              | 2199.36           | 0.80*22 <sub>1</sub> 16 <sub>2</sub> - 0.05*24 <sub>1</sub> 12 <sub>1</sub> 11 <sub>1</sub> 8 <sub>1</sub>                  | 0.40      |
|                | 4              | 2207.98           | 0.35*19 <sub>1</sub> + 0.24*22 <sub>1</sub> 5 <sub>1</sub>                                                                  | 4.75      |
|                | 5              | 2213.82           | 0.54*14 <sub>1</sub> 13 <sub>1</sub> 12 <sub>1</sub> 10 <sub>1</sub> + 0.11*16 <sub>2</sub> 14 <sub>1</sub> 13 <sub>1</sub> | 1.05      |
|                | 6              | 2234.04           | 0.37*21 <sub>1</sub> 9 <sub>1</sub> 8 <sub>1</sub> + 0.21*18 <sub>1</sub>                                                   | 0.48      |
|                | 7              | 2263.81           | 0.61*16 <sub>1</sub> 13 <sub>1</sub> 8 <sub>2</sub> - 0.18*20 <sub>1</sub> 8 <sub>1</sub>                                   | 0.37      |
|                | 8              | 2269.11           | 0.39*20 <sub>1</sub> 8 <sub>1</sub> + 0.23*16 <sub>1</sub> 13 <sub>1</sub> 8 <sub>2</sub>                                   | 1.18      |
|                | 9              | 2308.35           | 0.57*22 <sub>1</sub> 16 <sub>1</sub> 15 <sub>1</sub> + 0.19*24 <sub>1</sub> 22 <sub>1</sub> 21 <sub>1</sub>                 | 0.36      |
|                | 10             | 2310.33           | 0.47*17 <sub>1</sub> + 0.10*23 <sub>1</sub> 4 <sub>1</sub>                                                                  | 5.54      |
|                | 11             | 2351.26           | 0.62*23 <sub>1</sub> 4 <sub>1</sub> - 0.12*17 <sub>1</sub>                                                                  | 1.40      |

Table S22. Some bright states of Pyrazine-d4 in the CD stretching region. Transitions with intensities more than 0.30 km.mol<sup>-1</sup> are tabulated.

| Symmetry        | Transition no. | Excitation energy | State description                                                                                                       | Intensity |
|-----------------|----------------|-------------------|-------------------------------------------------------------------------------------------------------------------------|-----------|
| b <sub>1u</sub> | 1              | 2205.64           | 0.53*21 <sub>1</sub> 17 <sub>1</sub> + 0.18*9 <sub>1</sub>                                                              | 0.41      |
|                 | 2              | 2226.41           | 0.42*10 <sub>1</sub> 4 <sub>1</sub> - 0.21*9 <sub>1</sub>                                                               | 0.54      |
|                 | 3              | 2251.33           | 0.32*10 <sub>1</sub> 4 <sub>1</sub> + 0.26*9 <sub>1</sub>                                                               | 0.62      |
| b <sub>2u</sub> | 1              | 2144.69           | 0.88*16 <sub>1</sub> 4 <sub>1</sub> + 0.05*13 <sub>1</sub> 7 <sub>1</sub> 3 <sub>1</sub>                                | 0.54      |
|                 | 2              | 2233.58           | 0.73*23 <sub>2</sub> 14 <sub>1</sub> 7 <sub>1</sub> - 0.07*23 <sub>1</sub> 21 <sub>1</sub> 14 <sub>1</sub>              | 2.81      |
|                 | 3              | 2249.99           | 0.70*15 <sub>1</sub> - 0.09*16 <sub>1</sub> 3 <sub>1</sub>                                                              | 35.41     |
|                 | 4              | 2259.89           | 0.92*24 <sub>1</sub> 11 <sub>1</sub> 6 <sub>1</sub> + 0.02*24 <sub>1</sub> 8 <sub>1</sub> 7 <sub>1</sub> 6 <sub>1</sub> | 0.49      |
|                 | 5              | 2274.71           | 0.65*24 <sub>1</sub> 23 <sub>1</sub> 16 <sub>1</sub> - 0.13*16 <sub>1</sub> 3 <sub>1</sub>                              | 2.12      |
|                 | 6              | 2277.70           | 0.38*16 <sub>1</sub> 3 <sub>1</sub> + 0.33*14 <sub>3</sub> 7 <sub>1</sub>                                               | 1.59      |
|                 | 7              | 2278.11           | 0.34*14 <sub>3</sub> 7 <sub>1</sub> - 0.32*16 <sub>1</sub> 3 <sub>1</sub>                                               | 1.11      |
|                 | 8              | 2287.06           | 0.74*24 <sub>1</sub> 21 <sub>1</sub> 13 <sub>1</sub> - 0.16*23 <sub>1</sub> 21 <sub>1</sub> 14 <sub>1</sub>             | 0.37      |
|                 | 9              | 2355.31           | 0.90*18 <sub>1</sub> 2 <sub>1</sub> + 0.02*18 <sub>1</sub> 5 <sub>1</sub> 4 <sub>1</sub>                                | 0.44      |
|                 | 10             | 2386.71           | 0.87*21 <sub>1</sub> 10 <sub>1</sub> - 0.04*20 <sub>1</sub> 12 <sub>1</sub>                                             | 0.69      |

Table S23. Some bright states of pyridazine-d4 in the CD stretching region. Transitions with intensities more than 0.30  $\text{km.mol}^{-1}$  are tabulated.

| Symmetry       | Transition no. | Excitation energy | State description                                                                                        | Intensity |
|----------------|----------------|-------------------|----------------------------------------------------------------------------------------------------------|-----------|
| a <sub>1</sub> | 1              | 2254.88           | 0.56*22 <sub>1</sub> 20 <sub>1</sub> +0.10*16 <sub>2</sub> 12 <sub>1</sub> 10 <sub>1</sub>               | 0.37      |
|                | 2              | 2277.18           | 0.62*6 <sub>1</sub> 4 <sub>1</sub> +0.08*1 <sub>1</sub>                                                  | 0.47      |
|                | 3              | 2292.22           | 0.56*16 <sub>2</sub> 14 <sub>2</sub> -0.22*1 <sub>1</sub>                                                | 0.93      |
|                | 4              | 2292.72           | 0.36*16 <sub>2</sub> 14 <sub>2</sub> +0.28*1 <sub>1</sub>                                                | 1.16      |
|                | 5              | 2293.99           | 0.67*24 <sub>1</sub> 21 <sub>1</sub> 9 <sub>1</sub> +0.11*1 <sub>1</sub>                                 | 0.44      |
| b <sub>2</sub> | 1              | 2247.77           | 0.67*18 <sub>1</sub> +0.10*22 <sub>1</sub> 4 <sub>1</sub>                                                | 5.81      |
|                | 2              | 2264.46           | 0.53*15 <sub>1</sub> 11 <sub>1</sub> 6 <sub>1</sub> -0.29*17 <sub>1</sub>                                | 3.34      |
|                | 3              | 2271.00           | 0.85*24 <sub>1</sub> 13 <sub>2</sub> 6 <sub>1</sub> -0.05*17 <sub>1</sub>                                | 0.54      |
|                | 4              | 2271.28           | 0.28*17 <sub>1</sub> +0.27*15 <sub>1</sub> 11 <sub>1</sub> 6 <sub>1</sub>                                | 3.32      |
|                | 5              | 2307.12           | 0.53*22 <sub>1</sub> 4 <sub>1</sub> -0.11*16 <sub>1</sub> 10 <sub>1</sub> 5 <sub>1</sub>                 | 2.22      |
|                | 6              | 2310.03           | 0.51*16 <sub>1</sub> 10 <sub>1</sub> 5 <sub>1</sub> -0.10*14 <sub>1</sub> 12 <sub>1</sub> 8 <sub>1</sub> | 0.30      |

Table S24. The linear dipole moment surface of Pyrimidine. The calculation was done by using B3LYP/6-311++G(2d,2p) method using Gaussian 09 software. The derivatives are in  $\sqrt{km.mol^{-1}}$  unit.

| Mode | $\frac{d\mu_x}{dq_i}$ | $\frac{d\mu_y}{dq_i}$ | $\frac{d\mu_z}{dq_i}$ |
|------|-----------------------|-----------------------|-----------------------|
| 1    | 2.83656D-10           | -1.80471D-07          | 2.95331D+00           |
| 2    | -2.08923D-10          | -2.93293D-07          | -3.61307D+00          |
| 3    | 2.63710D-10           | 3.12928D-08           | -3.63641D+00          |
| 4    | 1.23171D-10           | -2.40245D-07          | 6.49360D+00           |
| 5    | 2.36286D-10           | 6.16420D-08           | -7.81283D+00          |
| 6    | -1.81331D-10          | 5.04235D-08           | 1.21769D+00           |
| 7    | -1.79063D-10          | -1.29014D-09          | -1.06905D+00          |
| 8    | -3.92581D-10          | 1.74801D-08           | 1.91001D+00           |
| 9    | 4.73865D-11           | -5.87210D-08          | 1.68820D+00           |
| 10   | -2.67703D-08          | -2.66811D-10          | 4.44194D-11           |
| 11   | 1.45697D-08           | -4.01992D-11          | -1.31558D-10          |
| 12   | -3.14559D-02          | 5.93876D-10           | 5.33593D-10           |
| 13   | 1.96942D-01           | -2.35263D-10          | -4.78004D-10          |
| 14   | -2.24483D+00          | -1.04794D-09          | -7.94407D-10          |
| 15   | -6.48774D+00          | -7.52315D-10          | -4.76897D-10          |
| 16   | 1.88824D+00           | -1.50869D-10          | 7.73198D-10           |
| 17   | 3.61124D-10           | -3.33831D+00          | -3.73874D-09          |
| 18   | 5.62090D-10           | 1.76910D+00           | 4.46235D-08           |
| 19   | 6.40468D-11           | 1.98429D+00           | 1.28477D-09           |
| 20   | 9.79945D-11           | 3.22771D+00           | -2.40878D-09          |
| 21   | 3.05044D-11           | 6.09661D-01           | 1.32634D-08           |
| 23   | 2.10780D-10           | -2.43151D+00          | -4.06578D-08          |
| 23   | 1.15254D-10           | -9.13585D+00          | -1.77550D-07          |
| 24   | 1.20110D-10           | 4.15021D+00           | -1.10089D-07          |

Table S25. The linear dipole moment surface of Pyrimidine-d4. The calculation was done by using B3LYP/6-311++G(2d,2p) method using Gaussian 09 software. The derivatives are in  $\sqrt{km.mol^{-1}}$  unit.

| Mode | $\frac{d\mu_x}{dq_i}$ | $\frac{d\mu_y}{dq_i}$ | $\frac{d\mu_z}{dq_i}$ |
|------|-----------------------|-----------------------|-----------------------|
| 1    | -2.13414D-10          | -1.15506D-07          | 2.13335D+00           |
| 2    | 5.61756D-11           | -2.00472D-07          | -3.33871D+00          |
| 3    | 3.14523D-11           | 1.14232D-08           | -3.93762D+00          |
| 4    | 1.62799D-10           | 2.47260D-07           | 8.32947D+00           |
| 5    | -1.22420D-11          | 3.65664D-08           | -4.91525D+00          |
| 6    | 4.83524D-10           | 1.77454D-08           | 1.26287D+00           |
| 7    | 6.10408D-11           | 4.15530D-08           | 1.83847D+00           |
| 8    | 7.95066D-11           | -1.09718D-08          | -1.10532D+00          |
| 9    | 1.88852D-10           | 5.27686D-08           | -1.72226D+00          |
| 10   | -6.89316D-08          | -5.42117D-11          | -9.34564D-11          |
| 11   | 4.57694D-09           | 5.82335D-11           | -6.20979D-10          |
| 12   | 1.50298D+00           | 7.33362D-11           | 7.25469D-11           |
| 13   | 1.08574D+00           | -4.39662D-10          | 2.24789D-11           |
| 14   | 2.67872D-01           | 1.64044D-10           | 1.79881D-09           |
| 15   | -4.81997D+00          | -1.27050D-09          | 1.29600D-10           |
| 16   | -1.78936D+00          | -1.41506D-10          | -6.53612D-11          |
| 17   | 2.56306D-10           | 4.38566D+00           | -8.06781D-08          |
| 18   | -1.66724D-10          | 9.43327D+00           | -2.30898D-07          |
| 19   | 5.91203D-10           | 1.18176D-01           | -1.79384D-08          |
| 20   | -1.69468D-10          | -2.21616D-01          | 8.74880D-10           |
| 21   | -1.26519D-10          | 1.37620D-01           | 4.80666D-08           |
| 22   | -2.11911D-10          | -2.16329D+00          | -5.96105D-09          |
| 23   | 4.27716D-11           | 1.57529D+00           | 2.63140D-10           |
| 24   | -2.20873D-10          | -3.23254D+00          | -1.75716D-09          |

Table S26. The linear dipole moment surface of Pyridazene. The calculation was done by using B3LYP/6-311++G(2d,2p) method using Gaussian 09 software. The derivatives are in  $\sqrt{km.mol^{-1}}$  unit.

| Mode | $\frac{d\mu_x}{dq_i}$ | $\frac{d\mu_y}{dq_i}$ | $\frac{d\mu_z}{dq_i}$ |
|------|-----------------------|-----------------------|-----------------------|
| 1    | -5.12756D-11          | 2.18171D-08           | 2.71541D+00           |
| 2    | -7.75061D-11          | -4.57508D-08          | 2.68191D-01           |
| 3    | -1.62207D-12          | -7.21655D-09          | 2.10959D+00           |
| 4    | -1.13268D-11          | 7.76064D-08           | -9.56666D-01          |
| 5    | 5.10583D-11           | -2.21186D-08          | -4.14836D-02          |
| 6    | -7.64472D-11          | -2.09656D-08          | 1.22625D-01           |
| 7    | -1.10787D-10          | -1.51781D-09          | -3.37559D+00          |
| 8    | 8.15220D-11           | 3.90624D-08           | 2.76379D+00           |
| 9    | 2.81140D-11           | -7.33929D-09          | -1.70245D+00          |
| 10   | -2.79488D-08          | -3.86506D-10          | 3.85259D-09           |
| 11   | -2.08246D-09          | -6.67878D-11          | 2.00368D-10           |
| 12   | 8.69678D-09           | 1.68461D-10           | -3.41445D-10          |
| 13   | 3.55457D-08           | -4.27248D-11          | -2.42044D-10          |
| 14   | -1.59187D-01          | 4.58522D-10           | 4.47954D-10           |
| 15   | -6.53757D+00          | -1.97335D-10          | -7.13403D-11          |
| 16   | -2.97871D+00          | 2.31973D-10           | -1.64102D-10          |
| 17   | -1.27296D-09          | 4.07519D+00           | -5.77115D-08          |
| 18   | -3.17806D-11          | 2.52364D+00           | -1.10893D-07          |
| 19   | -4.20058D-10          | -1.93886D+00          | -1.11033D-07          |
| 20   | -2.76844D-10          | -4.03292D+00          | 1.19334D-07           |
| 21   | -6.17560D-10          | -1.62080D+00          | -3.48437D-08          |
| 22   | -5.06490D-10          | 1.23133D+00           | 1.07163D-07           |
| 23   | -1.78922D-10          | 7.72822D-01           | 9.09720D-09           |
| 24   | 1.22999D-10           | 2.33679D-01           | 9.82105D-08           |

Table S27. The linear dipole moment surface of Pyridazine-d4. The calculation was done by using B3LYP/6-311++G(2d,2p) method using Gaussian 09 software. The derivatives are in  $\sqrt{km.mol^{-1}}$  unit.

| Mode | $\frac{d\mu_x}{dq_i}$ | $\frac{d\mu_y}{dq_i}$ | $\frac{d\mu_z}{dq_i}$ |
|------|-----------------------|-----------------------|-----------------------|
| 1    | 5.69930D-11           | -1.70200D-08          | -2.07130D+00          |
| 2    | 5.85779D-11           | -3.22740D-08          | 6.21363D-01           |
| 3    | -1.21598D-10          | 9.79181D-09           | 1.37911D+00           |
| 4    | -1.41654D-10          | 5.82748D-08           | 4.06515D-01           |
| 5    | -1.80246D-10          | 3.86965D-08           | 1.59227D+00           |
| 6    | -1.54740D-10          | 3.12896D-08           | 1.64373D+00           |
| 7    | 2.13611D-10           | 2.42567D-08           | -2.33855D+00          |
| 8    | 2.11296D-11           | -1.17819D-08          | -2.40213D+00          |
| 9    | -1.44329D-11          | -4.85334D-09          | -1.40557D+00          |
| 10   | -1.84088D-08          | -3.76610D-10          | 1.73378D-09           |
| 11   | 1.31964D-09           | -1.87218D-11          | -7.15569D-12          |
| 12   | 4.92996D-09           | 1.05955D-11           | -2.23595D-11          |
| 13   | -3.32584D-08          | 2.10246D-11           | -6.19108D-13          |
| 14   | 6.23999D-01           | -3.27587D-10          | -3.85106D-10          |
| 15   | -4.20664D+00          | 1.71279D-11           | 1.48173D-10           |
| 16   | -2.93426D+00          | 2.13723D-10           | 8.96445D-11           |
| 17   | 2.51486D-10           | 3.99119D+00           | -3.09428D-08          |
| 18   | -1.11944D-10          | 1.75869D+00           | -7.81011D-08          |
| 19   | -1.22553D-10          | -9.15811D-01          | -1.20017D-07          |
| 20   | -8.01328D-11          | -3.86624D+00          | 1.95184D-08           |
| 21   | 5.57255D-11           | -1.32691D+00          | -8.38474D-08          |
| 22   | 1.88501D-10           | -9.43519D-02          | 3.65969D-08           |
| 23   | 2.11799D-10           | 2.73217D-01           | -4.74961D-08          |
| 24   | -2.87369D-10          | 1.38905D-01           | 9.86409D-08           |



Table S28. The linear dipole moment surface of Pyrazine. The calculation was done by using B3LYP/6-311++G(2d,2p) method using Gaussian 09 software. The derivatives are in  $\sqrt{km.mol^{-1}}$  unit.

| Mode | $\frac{d\mu_x}{dq_i}$ | $\frac{d\mu_y}{dq_i}$ | $\frac{d\mu_z}{dq_i}$ |
|------|-----------------------|-----------------------|-----------------------|
| 1    | 4.11647D-12           | 2.04772D-09           | 1.95939D-08           |
| 2    | -1.78503D-11          | -2.17065D-09          | 1.60687D-08           |
| 3    | -9.36849D-12          | -7.85933D-10          | 5.83305D-08           |
| 4    | -5.21686D-12          | -7.45725D-10          | -3.73010D-09          |
| 5    | -4.78204D-12          | 2.27962D-09           | 1.71112D-08           |
| 6    | -4.61996D-09          | 2.53111D-11           | -1.63396D-11          |
| 7    | 2.02744D-09           | 3.42335D-12           | 1.41698D-12           |
| 8    | 1.52683D-08           | 7.09790D-12           | -8.49026D-10          |
| 9    | -1.22583D-11          | -1.40709D-08          | 1.50462D+00           |
| 10   | -2.35082D-11          | -1.93543D-09          | -7.49527D-01          |
| 11   | 1.70003D-11           | 3.17020D-09           | -2.36375D+00          |
| 12   | 8.17990D-11           | 3.10609D-10           | -5.88700D+00          |
| 13   | -5.29345D-09          | -4.65323D-11          | 2.49018D-11           |
| 14   | -3.81650D-09          | -4.07016D-10          | -1.98677D-11          |
| 15   | 5.29972D-12           | 7.91411D+00           | -6.84609D-09          |
| 16   | -9.12245D-12          | -5.56157D+00          | 1.18625D-08           |
| 17   | 4.91111D-12           | 2.11278D+00           | -2.18106D-08          |
| 18   | -7.14315D-12          | 3.57414D+00           | 4.90681D-09           |
| 19   | 1.58597D-10           | 1.10911D-08           | -4.91994D-08          |
| 20   | -1.54899D-10          | -8.08850D-09          | 3.55638D-08           |
| 21   | -1.19276D-10          | 4.82807D-09           | -2.94168D-08          |
| 22   | -4.26986D-11          | 1.75933D-09           | -2.73773D-08          |
| 23   | -5.50888D+00          | -2.90122D-12          | -3.38918D-11          |
| 24   | 4.91941D+00           | -7.08565D-13          | -6.41237D-10          |

Table S29. The linear dipole moment surface of Pyrazine-d4. The calculation was done by using B3LYP/6-311++G(2d,2p) method using Gaussian 09 software. The derivatives are in  $\sqrt{km.mol^{-1}}$  unit.

| Mode | $\frac{d\mu_x}{dq_i}$ | $\frac{d\mu_y}{dq_i}$ | $\frac{d\mu_z}{dq_i}$ |
|------|-----------------------|-----------------------|-----------------------|
| 1    | 1.16942D-11           | 9.53560D-09           | 1.38800D-08           |
| 2    | 5.26202D-11           | -2.15162D-09          | 3.25355D-08           |
| 3    | 8.29049D-12           | 5.05330D-09           | -2.68132D-08          |
| 4    | 2.09698D-12           | 8.51258D-10           | 2.71023D-08           |
| 5    | 3.71588D-12           | 2.54963D-09           | 1.93715D-08           |
| 6    | -4.52990D-09          | -5.20610D-11          | 4.72560D-12           |
| 7    | 1.49997D-09           | -3.30951D-14          | 7.37094D-12           |
| 8    | 2.36731D-08           | -5.22277D-12          | 5.80070D-11           |
| 9    | 5.13338D-12           | -9.18749D-09          | 1.50839D+00           |
| 10   | -4.70364D-11          | -3.46220D-09          | 1.65437D+00           |
| 11   | -2.61205D-12          | 1.78596D-09           | 3.31813D+00           |
| 12   | 4.68001D-11           | 1.52783D-09           | -4.40071D+00          |
| 13   | -1.08340D-09          | 4.31066D-10           | -8.92266D-11          |
| 14   | 4.52345D-09           | 1.33844D-10           | 2.63309D-12           |
| 15   | 1.50378D-12           | 7.04149D+00           | -5.69292D-09          |
| 16   | -3.52931D-11          | -5.95506D+00          | 7.87991D-09           |
| 17   | 2.21779D-11           | 1.95736D+00           | -2.14974D-08          |
| 18   | 8.32037D-12           | 1.16749D+00           | 6.41735D-09           |
| 19   | 7.04667D-10           | 8.59961D-09           | -3.51160D-08          |
| 20   | -1.84894D-10          | -8.36450D-09          | 3.49478D-08           |
| 21   | 4.15420D-11           | 2.64887D-09           | -1.81473D-07          |
| 22   | 9.33425D-11           | 1.73714D-09           | -2.62171D-08          |
| 23   | -2.54109D+00          | -6.27594D-12          | -5.16328D-11          |
| 24   | -5.21162D+00          | 2.06748D-12           | 3.17256D-10           |

Table S30. The linear dipole moment surface of trans-butadiene. The calculation was done by using B3LYP/6-311++G(2d,2p) method using Gaussian 09 software. The derivatives are in  $\sqrt{km.mol^{-1}}$  unit.

| Mode | $\frac{d\mu_x}{dq_i}$ | $\frac{d\mu_y}{dq_i}$ | $\frac{d\mu_z}{dq_i}$ |
|------|-----------------------|-----------------------|-----------------------|
| 1    | 9.22103D-08           | -3.32597D-07          | 3.78924D-10           |
| 2    | -1.05521D-07          | -1.61735D-07          | 1.04126D-09           |
| 3    | 8.57642D-08           | -3.16577D-07          | -1.03406D-09          |
| 4    | -1.25335D-07          | 7.49660D-08           | 1.53685D-09           |
| 5    | -4.91304D-08          | 3.74626D-07           | 3.62235D-10           |
| 6    | -8.46888D-08          | 3.66031D-08           | -7.66151D-10          |
| 7    | -4.97262D-09          | -7.69414D-08          | -8.79643D-10          |
| 8    | 4.76458D-08           | -1.94702D-08          | 1.15453D-09           |
| 9    | -2.61479D-08          | 3.76156D-08           | -1.93329D-09          |
| 10   | 5.51612D-11           | -5.49738D-11          | -5.87947D+00          |
| 11   | -1.80683D-10          | 5.06938D-10           | -9.31788D+00          |
| 12   | -2.14096D-10          | 6.90315D-10           | 3.62218D+00           |
| 13   | 1.03248D-10           | -1.56322D-10          | 8.27737D-01           |
| 14   | 5.76663D-10           | 7.47056D-10           | -2.50646D-08          |
| 15   | 1.08559D-10           | -4.92242D-10          | 6.88043D-08           |
| 16   | 1.16806D-09           | 2.10800D-09           | -3.27060D-08          |
| 17   | 4.19724D+00           | -2.10656D+00          | 3.97373D-10           |
| 18   | -2.92780D+00          | 1.42526D+00           | -1.60643D-10          |
| 19   | 4.00146D+00           | 1.64271D+00           | -2.59822D-10          |
| 20   | -1.61593D+00          | -4.65056D+00          | -2.78403D-12          |
| 21   | -1.61600D+00          | -8.88636D-01          | 2.31300D-10           |
| 22   | -1.51340D+00          | 2.23462D-01           | 1.01741D-10           |
| 23   | -1.43718D-01          | -1.37694D+00          | 1.32192D-11           |
| 24   | 1.45506D-01           | -1.68737D+00          | 1.34305D-10           |

Table S31. The linear dipole moment surface of trans-butadiene-d6. The calculation was done by using B3LYP/6-311++G(2d,2p) method using Gaussian 09 software. The derivatives are in  $\sqrt{km.mol}^{-1}$  unit.

| Mode | $\frac{d\mu_x}{dq_i}$ | $\frac{d\mu_y}{dq_i}$ | $\frac{d\mu_z}{dq_i}$ |
|------|-----------------------|-----------------------|-----------------------|
| 1    | 1.21773D-07           | -2.77550D-07          | 5.11617D-10           |
| 2    | 8.24198D-10           | -2.43841D-07          | -6.70496D-10          |
| 3    | 9.10343D-08           | -1.02772D-07          | 7.51419D-10           |
| 4    | -1.34076D-07          | 2.52734D-08           | 5.62980D-10           |
| 5    | -8.38588D-08          | 1.74927D-07           | -6.58098D-10          |
| 6    | 3.29609D-09           | 2.17743D-07           | -6.87305D-10          |
| 7    | -2.41199D-08          | 4.21413D-08           | 7.29445D-10           |
| 8    | 2.84939D-08           | 9.50350D-09           | -3.76433D-09          |
| 9    | -2.66695D-08          | 4.48987D-08           | -7.63478D-10          |
| 10   | -5.01389D-12          | -1.36171D-10          | -2.29409D-01          |
| 11   | 1.02207D-10           | -1.45185D-10          | -8.23072D+00          |
| 12   | -1.99942D-12          | -3.70127D-10          | 2.80623D+00           |
| 13   | -3.50198D-11          | 1.22359D-10           | 7.12360D-01           |
| 14   | -1.48951D-10          | -6.98010D-10          | 4.75251D-08           |
| 15   | 1.10044D-10           | 9.83605D-10           | -4.34620D-08          |
| 16   | 6.25853D-10           | 1.64401D-09           | -2.06639D-08          |
| 17   | 3.22641D+00           | -1.01455D+00          | 2.81535D-11           |
| 18   | -1.92917D+00          | 6.42680D-01           | -1.27624D-10          |
| 19   | 2.93145D+00           | 3.18955D-01           | -4.24307D-11          |
| 20   | -7.27940D-01          | -4.22300D+00          | -5.44392D-10          |
| 21   | -6.44324D-01          | -8.28770D-01          | 1.16082D-10           |
| 22   | 1.76316D+00           | 1.33970D+00           | -6.95698D-11          |
| 23   | 1.07481D-01           | -1.20369D+00          | 1.78924D-10           |
| 24   | 1.36290D-01           | -1.38705D+00          | -8.72362D-11          |

Table S32. The linear dipole moment surface of Thiophene. The calculation was done by using B3LYP/6-311++G(2d,2p) method using Gaussian 09 software. The derivatives are in  $\sqrt{km.mol^{-1}}$  unit.

| Mode | $\frac{d\mu_x}{dq_i}$ | $\frac{d\mu_y}{dq_i}$ | $\frac{d\mu_z}{dq_i}$ |
|------|-----------------------|-----------------------|-----------------------|
| 1    | -2.79827D-10          | -2.70365D-07          | 1.11413D+00           |
| 2    | -2.39083D-10          | 3.47997D-07           | 1.90453D+00           |
| 3    | 3.78796D-11           | -7.92720D-08          | -2.87452D+00          |
| 4    | -4.50458D-11          | -2.06948D-07          | 1.16694D+00           |
| 5    | 3.70506D-10           | 3.19490D-06           | 1.84978D+00           |
| 6    | 3.11381D-10           | 8.32679D-08           | 1.74960D+00           |
| 7    | 4.40244D-11           | 4.43077D-08           | -4.82128D+00          |
| 8    | -3.00012D-10          | -3.91298D-08          | 4.52494D-01           |
| 9    | 1.59732D-08           | -3.62703D-10          | -2.10871D-09          |
| 10   | 4.32726D-08           | -8.85157D-11          | -1.24292D-09          |
| 11   | -5.27517D-08          | 1.79047D-10           | -1.68666D-09          |
| 12   | -1.37080D-01          | -8.29555D-10          | -4.54454D-10          |
| 13   | -1.15022D+01          | 4.49254D-10           | -6.32244D-10          |
| 14   | -7.55619D-01          | -7.84236D-10          | 2.69899D-10           |
| 15   | 9.16806D-10           | 1.81462D-01           | -3.09009D-07          |
| 16   | -8.33356D-10          | 1.84446D+00           | 2.86861D-07           |
| 17   | 2.42800D-10           | -4.04206D-01          | -7.95300D-08          |
| 18   | -3.24335D-10          | 3.28871D+00           | 2.71053D-07           |
| 19   | 2.07137D-09           | 2.00879D+00           | -3.23038D-06          |
| 20   | 5.62445D-11           | -1.13930D+00          | -2.69159D-07          |
| 21   | -1.72056D-10          | 6.87113D-01           | 4.92641D-08           |

Table S33. The linear dipole moment surface of Thiophene-d4. The calculation was done by using B3LYP/6-311++G(2d,2p) method using Gaussian 09 software. The derivatives are in  $\sqrt{km.mol^{-1}}$  unit.

| Mode | $\frac{d\mu_x}{dq_i}$ | $\frac{d\mu_y}{dq_i}$ | $\frac{d\mu_z}{dq_i}$ |
|------|-----------------------|-----------------------|-----------------------|
| 1    | -2.77794D-10          | -1.17943D-07          | 1.04102D+00           |
| 2    | -1.84035D-10          | 3.18551D-07           | 6.91252D-01           |
| 3    | 2.86926D-11           | 6.12500D-08           | -3.24097D+00          |
| 4    | 7.86231D-11           | -1.79410D-07          | 1.88924D+00           |
| 5    | 2.99032D-10           | 7.85575D-08           | -1.05568D+00          |
| 6    | 2.80399D-10           | -2.32259D-07          | 1.44359D+00           |
| 7    | -1.05173D-10          | -4.01925D-08          | -4.05698D+00          |
| 8    | 5.17152D-10           | 5.40956D-08           | -7.78683D-01          |
| 9    | 3.22071D-08           | -4.43691D-10          | -4.75167D-11          |
| 10   | -3.14406D-08          | -3.40278D-11          | -9.66707D-10          |
| 11   | -2.06912D-08          | 5.93678D-11           | -1.82603D-09          |
| 12   | 5.00763D-01           | -6.10208D-11          | 6.32432D-11           |
| 13   | -8.55372D+00          | 1.46958D-10           | -4.20670D-10          |
| 14   | -5.14541D-01          | 7.47228D-10           | -3.18995D-10          |
| 15   | 4.78820D-10           | -4.68009D-02          | -2.32424D-07          |
| 16   | -6.31265D-10          | 1.27274D+00           | 2.69076D-07           |
| 17   | 1.69855D-11           | -1.32041D+00          | -1.13448D-07          |
| 18   | 3.80422D-10           | -1.83238D+00          | -9.20634D-08          |
| 18   | -1.15372D-09          | -2.02776D+00          | -1.92780D-07          |
| 20   | -7.85991D-10          | 2.34633D-01           | 2.10115D-07           |
| 21   | -4.76898D-10          | -1.15421D+00          | -6.69075D-08          |

Table S34: The quartic potential energy surface of Pyrimidine. The calculation was done by using B3LYP/6-311++G(2d,2p) method using Gaussian 09 software. The force constants (F<sub>i</sub>'s) are in cm<sup>-1</sup> units.

| I J   | F <sub>i</sub> (I,J) | I J K   | F <sub>i</sub> (I,J,K) | I J K L     | F <sub>i</sub> (I,J,K,L) | I J K L     | F <sub>i</sub> (I,J,K,L) |
|-------|----------------------|---------|------------------------|-------------|--------------------------|-------------|--------------------------|
| 1 1   | 3201.75540           | 24 19 6 | -8.95841               | 15 12 10 10 | -112.86515               | 21 21 8 3   | -0.43358                 |
| 2 2   | 3171.67384           | 24 19 7 | -18.24708              | 15 12 11 11 | -19.96351                | 21 21 8 4   | -6.70515                 |
| 3 3   | 3155.55476           | 24 19 8 | 3.08533                | 15 12 12 12 | 6.21578                  | 21 21 8 5   | -11.50430                |
| 4 4   | 1607.14688           | 24 19 9 | -8.03029               | 15 13 1 1   | 148.85698                | 21 21 8 6   | -11.34349                |
| 5 5   | 1436.99400           | 24 20 1 | -20.77786              | 15 13 2 2   | -206.97229               | 21 21 8 7   | 2.47313                  |
| 6 6   | 1162.76269           | 24 20 2 | 56.49583               | 15 13 3 3   | -60.62118                | 21 21 8 8   | 4.55054                  |
| 7 7   | 1082.71470           | 24 20 3 | 68.04453               | 15 13 4 4   | 5.43477                  | 21 21 9 1   | 1.61774                  |
| 8 8   | 1009.61930           | 24 20 4 | -9.81736               | 15 13 5 5   | 4.65669                  | 21 21 9 2   | -2.58036                 |
| 9 9   | 696.90072            | 24 20 5 | 2.33975                | 15 13 6 6   | 2.41359                  | 21 21 9 3   | -0.64566                 |
| 10 10 | 1002.98792           | 24 20 6 | -11.97915              | 15 13 7 7   | 2.26890                  | 21 21 9 4   | 8.82901                  |
| 11 11 | 409.16007            | 24 20 7 | -11.43742              | 15 13 9 9   | 0.75818                  | 21 21 9 5   | -2.45789                 |
| 12 12 | 1027.72101           | 24 20 8 | 1.17283                | 15 13 10 10 | 57.48839                 | 21 21 9 6   | 10.74483                 |
| 13 13 | 984.19117            | 24 20 9 | 4.73649                | 15 13 11 11 | 13.63966                 | 21 21 9 7   | 3.66377                  |
| 14 14 | 822.33769            | 24 21 1 | -69.08109              | 15 13 12 12 | 61.56245                 | 21 21 9 8   | 0.52203                  |
| 15 15 | 737.70762            | 24 21 2 | 18.72861               | 15 13 13 12 | 89.59050                 | 21 21 9 9   | -0.31823                 |
| 16 16 | 351.59394            | 24 21 3 | -31.16022              | 15 13 13 13 | 58.38819                 | 21 21 10 10 | 19.92164                 |
| 17 17 | 3158.72801           | 24 21 4 | -9.79910               | 15 14 1 1   | -217.06900               | 21 21 11 10 | -7.55763                 |
| 18 18 | 1606.05303           | 24 21 5 | -13.22655              | 15 14 2 2   | -23.26627                | 21 21 11 11 | -8.65143                 |
| 19 19 | 1499.43396           | 24 21 6 | 16.16369               | 15 14 3 3   | -103.83121               | 21 21 12 12 | 8.28294                  |
| 20 20 | 1400.29392           | 24 21 7 | 12.99992               | 15 14 4 4   | 8.47767                  | 21 21 13 12 | -9.57056                 |
| 21 21 | 1250.97416           | 24 21 8 | -13.02284              | 15 14 5 5   | 9.08379                  | 21 21 13 13 | 7.48085                  |
| 22 22 | 1206.17663           | 24 21 9 | 6.81347                | 15 14 6 6   | 6.20857                  | 21 21 14 12 | -3.52449                 |
| 23 23 | 1094.68642           | 24 22 1 | 6.27925                | 15 14 7 7   | 3.06997                  | 21 21 14 13 | -6.66984                 |
| 24 24 | 637.74512            | 24 22 2 | -30.23882              | 15 14 8 8   | 0.87789                  | 21 21 14 14 | 13.46744                 |
|       |                      | 24 22 3 | 2.33833                | 15 14 9 9   | 1.84763                  | 21 21 15 12 | -0.52867                 |
|       |                      | 24 22 4 | -26.38306              | 15 14 10 10 | 82.46685                 | 21 21 15 13 | 1.98042                  |
|       |                      | 24 22 5 | -1.51411               | 15 14 11 11 | 15.84838                 | 21 21 15 14 | 19.03213                 |
|       |                      | 24 22 6 | -11.74210              | 15 14 12 12 | 71.19657                 | 21 21 15 15 | 4.55871                  |
|       |                      | 24 22 7 | 1.13613                | 15 14 13 13 | 82.49196                 | 21 21 16 12 | 10.37736                 |
|       |                      | 24 22 8 | 3.98604                | 15 14 14 12 | 30.67329                 | 21 21 16 13 | 0.28001                  |
|       |                      | 24 22 9 | -7.91355               | 15 14 14 13 | -71.08457                | 21 21 16 14 | 4.45565                  |
|       |                      | 24 23 1 | 94.95860               | 15 14 14 14 | 137.58298                | 21 21 16 15 | -10.09546                |
|       |                      | 24 23 2 | 26.24605               | 15 15 1 1   | -127.03355               | 21 21 16 16 | -14.09737                |
|       |                      | 24 23 3 | -20.49867              | 15 15 2 1   | -0.40733                 | 21 21 17 17 | -85.88823                |
|       |                      | 24 23 4 | -7.91962               | 15 15 2 2   | -113.98171               | 21 21 18 17 | 0.35689                  |
|       |                      | 24 23 5 | 23.18846               | 15 15 3 1   | -0.68201                 | 21 21 18 18 | 21.38839                 |
|       |                      | 24 23 6 | 11.66684               | 15 15 3 2   | 1.83679                  | 21 21 19 17 | 2.98487                  |
|       |                      | 24 23 7 | 20.47738               | 15 15 3 3   | -129.15506               | 21 21 19 18 | 2.65541                  |
|       |                      | 24 23 8 | 5.25522                | 15 15 4 1   | 1.14085                  | 21 21 19 19 | 13.95835                 |
|       |                      | 24 23 9 | 5.52084                | 15 15 4 2   | 0.46573                  | 21 21 20 17 | -2.85370                 |
|       |                      | 24 24 1 | 39.75736               | 15 15 4 3   | 3.84466                  | 21 21 20 18 | -5.64780                 |
|       |                      | 24 24 2 | -18.09488              | 15 15 4 4   | -2.65225                 | 21 21 20 19 | -12.59204                |
|       |                      | 24 24 3 | 9.84076                | 15 15 5 1   | -1.57235                 | 21 21 20 20 | 20.90765                 |
|       |                      | 24 24 4 | 18.49708               | 15 15 5 2   | 0.31511                  | 21 21 21 17 | 3.23258                  |
|       |                      | 24 24 5 | 5.76535                | 15 15 5 3   | 0.32745                  | 21 21 21 18 | -6.86244                 |
|       |                      | 24 24 6 | -7.10494               | 15 15 5 4   | -7.88860                 | 21 21 21 19 | -6.80949                 |
|       |                      | 24 24 7 | -15.55378              | 15 15 5 5   | 0.21364                  | 21 21 21 20 | -9.46327                 |
|       |                      | 24 24 9 | -2.84753               | 15 15 6 1   | 1.31392                  | 21 21 21 21 | 47.83528                 |
|       |                      |         |                        | 15 15 6 2   | -1.01612                 | 22 17 1 1   | -0.51586                 |
|       |                      |         |                        | 15 15 6 3   | -0.79545                 | 22 17 2 2   | -0.25785                 |
|       |                      |         |                        | 15 15 6 4   | 5.03863                  | 22 17 3 3   | -5.86937                 |
|       |                      |         |                        | 15 15 6 5   | -6.70609                 | 22 17 4 4   | -0.29640                 |
|       |                      |         |                        | 15 15 6 6   | -1.76193                 | 22 17 5 5   | 5.39328                  |
|       |                      |         |                        | 15 15 7 1   | -2.73099                 | 22 17 6 6   | 2.74846                  |
|       |                      |         |                        | 15 15 7 2   | 0.72287                  | 22 17 7 7   | 1.77381                  |
|       |                      |         |                        | 15 15 7 3   | -1.78233                 | 22 17 9 9   | 0.35347                  |
|       |                      |         |                        | 15 15 7 4   | 4.66629                  | 22 17 10 10 | 6.17080                  |
|       |                      |         |                        | 15 15 7 5   | -5.51697                 | 22 17 11 11 | 1.25766                  |
|       |                      |         |                        | 15 15 7 6   | 4.14587                  | 22 17 12 12 | 2.98049                  |
|       |                      |         |                        | 15 15 7 7   | -2.13102                 | 22 17 13 13 | -0.37556                 |
|       |                      |         |                        | 15 15 8 1   | 0.56927                  | 22 17 14 14 | 3.14881                  |
|       |                      |         |                        | 15 15 8 2   | -0.19011                 | 22 17 15 15 | 3.60703                  |
|       |                      |         |                        | 15 15 8 3   | -0.10261                 | 22 17 16 16 | -1.20360                 |
|       |                      |         |                        | 15 15 8 4   | -0.23160                 | 22 17 17 17 | -6.50775                 |
|       |                      |         |                        | 15 15 8 5   | 0.61316                  | 22 18 1 1   | 5.72530                  |
|       |                      |         |                        | 15 15 8 6   | 0.21628                  | 22 18 2 2   | 41.90310                 |
|       |                      |         |                        | 15 15 8 7   | 0.54319                  | 22 18 3 3   | 7.69136                  |
|       |                      |         |                        | 15 15 8 8   | -3.85867                 | 22 18 4 4   | 8.35981                  |
|       |                      |         |                        | 15 15 9 1   | 0.88525                  | 22 18 5 5   | -5.52492                 |
|       |                      |         |                        | 15 15 9 2   | 0.81039                  | 22 18 6 6   | -4.42865                 |
|       |                      |         |                        | 15 15 9 3   | -0.34419                 | 22 18 7 7   | 12.29198                 |
|       |                      |         |                        | 15 15 9 4   | 4.29300                  | 22 18 8 8   | -3.54379                 |
|       |                      |         |                        | 15 15 9 5   | -5.09418                 | 22 18 9 9   | -3.25294                 |
|       |                      |         |                        | 15 15 9 6   | 3.25907                  | 22 18 10 10 | -0.27552                 |
|       |                      |         |                        | 15 15 9 7   | 3.76871                  | 22 18 11 11 | 0.80255                  |
|       |                      |         |                        | 15 15 9 9   | 0.26166                  | 22 18 12 12 | -2.94783                 |
|       |                      |         |                        | 15 15 10 10 | 105.55198                | 22 18 13 13 | -3.44038                 |
|       |                      |         |                        | 15 15 11 10 | -44.98501                | 22 18 14 14 | -0.30334                 |
|       |                      |         |                        | 15 15 11 11 | 26.78747                 | 22 18 15 15 | -2.54016                 |
|       |                      |         |                        | 15 15 12 12 | 90.84772                 | 22 18 16 16 | -8.82683                 |
|       |                      |         |                        | 15 15 13 12 | -7.13598                 | 22 18 17 17 | 7.44158                  |
|       |                      |         |                        | 15 15 13 13 | 100.55692                | 22 18 18 17 | 3.04999                  |
|       |                      |         |                        | 15 15 14 12 | 3.01554                  | 22 18 18 18 | 6.91296                  |
|       |                      |         |                        | 15 15 14 13 | -25.01328                | 22 19 1 1   | -7.86339                 |
|       |                      |         |                        | 15 15 14 14 | 93.19097                 | 22 19 2 2   | 74.42487                 |

| I J K | FI(I,J,K)  | I J K L | FI(I,J,K,L) | I J K L     | FI(I,J,K,L) | I J K L     | FI(I,J,K,L) |
|-------|------------|---------|-------------|-------------|-------------|-------------|-------------|
| 7 2 2 | -14.92609  | 5 1 1 1 | 15.80937    | 15 15 15 12 | -5.15217    | 22 19 3 3   | 9.87221     |
| 7 3 1 | 2.44993    | 5 2 1 1 | 1.12042     | 15 15 15 13 | 24.78928    | 22 19 4 4   | 10.95021    |
| 7 3 2 | 0.71796    | 5 2 2 2 | 3.15541     | 15 15 15 14 | 74.50778    | 22 19 5 5   | -0.95814    |
| 7 3 3 | -18.11821  | 5 3 1 1 | -3.11775    | 15 15 15 15 | 71.40466    | 22 19 6 6   | -2.75797    |
| 7 4 1 | 4.75730    | 5 3 2 2 | 0.41527     | 16 12 1 1   | -66.51667   | 22 19 7 7   | -6.82087    |
| 7 4 2 | -8.35228   | 5 3 3 1 | 4.33022     | 16 12 2 2   | -162.98670  | 22 19 8 8   | 1.76135     |
| 7 4 3 | 49.31804   | 5 3 3 2 | -0.70312    | 16 12 3 3   | -95.09479   | 22 19 9 9   | 1.56560     |
| 7 4 4 | -109.06219 | 5 3 3 3 | 8.46549     | 16 12 4 4   | 6.49749     | 22 19 10 10 | -2.12419    |
| 7 5 1 | -14.27665  | 5 4 1 1 | 5.17522     | 16 12 5 5   | 7.21647     | 22 19 11 11 | -6.75294    |
| 7 5 2 | 6.62424    | 5 4 2 2 | 0.21907     | 16 12 6 6   | 4.48239     | 22 19 12 12 | -7.54492    |
| 7 5 3 | -65.62235  | 5 4 3 3 | 73.05705    | 16 12 7 7   | 4.04017     | 22 19 13 13 | -12.63126   |
| 7 5 4 | 24.59342   | 5 4 4 1 | -1.69157    | 16 12 8 8   | 0.48609     | 22 19 14 14 | -2.77457    |
| 7 5 5 | -9.61110   | 5 4 4 2 | 1.59608     | 16 12 9 9   | 0.46043     | 22 19 15 15 | -2.62976    |
| 7 6 1 | 19.74857   | 5 4 4 3 | -6.67729    | 16 12 10 10 | 78.13569    | 22 19 16 16 | 1.47469     |
| 7 6 2 | -7.72264   | 5 4 4 4 | 6.03315     | 16 12 11 11 | 15.34150    | 22 19 17 17 | 9.78354     |
| 7 6 3 | 55.11571   | 5 5 1 1 | -6.02244    | 16 12 12 12 | 81.25853    | 22 19 18 18 | -12.48445   |
| 7 6 4 | 39.56900   | 5 5 2 1 | 2.86712     | 16 13 1 1   | 92.68155    | 22 19 19 17 | -0.83178    |
| 7 6 5 | 4.11440    | 5 5 2 2 | -3.05191    | 16 13 2 2   | -210.26717  | 22 19 19 18 | -3.78381    |
| 7 6 6 | -32.43846  | 5 5 3 1 | -22.82448   | 16 13 3 3   | 47.64130    | 22 19 19 19 | -2.13364    |
| 7 7 1 | 22.96127   | 5 5 3 2 | 10.38043    | 16 13 4 4   | -3.88416    | 22 20 1 1   | 3.54455     |
| 7 7 2 | -3.82570   | 5 5 3 3 | -86.24470   | 16 13 5 5   | -1.53653    | 22 20 2 2   | 90.24750    |
| 7 7 3 | 41.97956   | 5 5 4 1 | 0.82404     | 16 13 6 6   | -2.44598    | 22 20 3 3   | -15.63520   |
| 7 7 4 | 56.14827   | 5 5 4 2 | 0.49755     | 16 13 7 7   | -3.61393    | 22 20 4 4   | 2.42224     |
| 7 7 5 | -30.80581  | 5 5 4 3 | 3.10578     | 16 13 8 8   | 0.84587     | 22 20 5 5   | 0.94520     |
| 7 7 6 | -93.64274  | 5 5 4 4 | 14.78424    | 16 13 9 9   | 0.80728     | 22 20 6 6   | 1.75422     |
| 8 1 1 | -17.45069  | 5 5 5 1 | 1.33402     | 16 13 10 10 | -39.14078   | 22 20 7 7   | -0.10127    |
| 8 2 1 | -0.35302   | 5 5 5 2 | 0.61043     | 16 13 11 11 | -10.02313   | 22 20 8 8   | 1.31853     |
| 8 2 2 | -2.27521   | 5 5 5 3 | 5.87241     | 16 13 12 12 | 34.07474    | 22 20 9 9   | 1.32677     |
| 8 3 1 | 1.33742    | 5 5 5 4 | -9.73773    | 16 13 13 12 | 105.72652   | 22 20 10 10 | 2.05920     |
| 8 3 2 | 1.18512    | 5 5 5 5 | 14.21148    | 16 13 13 13 | 74.30167    | 22 20 11 11 | 1.04271     |
| 8 3 3 | -5.74792   | 6 1 1 1 | 2.22588     | 16 14 1 1   | -118.75232  | 22 20 12 12 | -6.77994    |
| 8 4 1 | 0.90004    | 6 2 1 1 | 0.26739     | 16 14 2 2   | -21.34429   | 22 20 13 13 | -13.20436   |
| 8 4 2 | 1.30894    | 6 2 2 1 | -0.55425    | 16 14 3 3   | 51.76043    | 22 20 14 14 | 1.63029     |
| 8 4 3 | -4.41162   | 6 2 2 2 | 13.22821    | 16 14 4 4   | -6.40466    | 22 20 16 16 | -0.35202    |
| 8 4 4 | -108.47414 | 6 3 1 1 | -1.11558    | 16 14 5 5   | -0.92167    | 22 20 17 17 | -19.03362   |
| 8 5 1 | 1.85259    | 6 3 2 2 | 1.82383     | 16 14 6 6   | -1.10245    | 22 20 18 18 | -2.07768    |
| 8 5 2 | 1.80746    | 6 3 3 1 | -1.91324    | 16 14 7 7   | -2.90956    | 22 20 19 19 | -11.41780   |
| 8 5 3 | 3.46232    | 6 3 3 2 | 0.73234     | 16 14 8 8   | 0.54908     | 22 20 20 17 | 3.19905     |
| 8 5 4 | -60.51715  | 6 3 3 3 | -5.36039    | 16 14 9 9   | 0.32662     | 22 20 20 18 | -9.57263    |
| 8 5 5 | -84.77211  | 6 4 1 1 | -3.11974    | 16 14 10 10 | -58.68907   | 22 20 20 19 | -15.81014   |
| 8 6 1 | -2.70923   | 6 4 2 2 | -1.80336    | 16 14 11 11 | -11.41366   | 22 20 20 20 | -16.00796   |
| 8 6 2 | 3.28814    | 6 4 3 3 | -54.63246   | 16 14 12 12 | -3.60551    | 22 21 1 1   | 8.45215     |
| 8 6 3 | 0.23581    | 6 4 4 1 | 2.60082     | 16 14 13 13 | 41.44431    | 22 21 2 2   | 26.30666    |
| 8 6 4 | 16.71660   | 6 4 4 2 | 0.11074     | 16 14 14 12 | 51.13715    | 22 21 3 3   | 16.02772    |
| 8 6 5 | -37.70758  | 6 4 4 3 | 5.48463     | 16 14 14 13 | -59.28770   | 22 21 4 4   | 4.04694     |
| 8 6 6 | -44.58912  | 6 4 4 4 | -1.62599    | 16 14 14 14 | 53.73391    | 22 21 5 5   | 6.84760     |
| 8 7 1 | 7.28719    | 6 5 1 1 | 4.27042     | 16 15 1 1   | -62.53631   | 22 21 6 6   | 3.56393     |
| 8 7 2 | -1.69492   | 6 5 2 2 | -0.82577    | 16 15 2 2   | -112.65154  | 22 21 7 7   | -1.62126    |
| 8 7 3 | 4.86775    | 6 5 3 3 | 63.18778    | 16 15 3 3   | 73.58080    | 22 21 8 8   | 6.32667     |
| 8 7 4 | 2.88724    | 6 5 4 4 | -12.75567   | 16 15 4 4   | -1.42550    | 22 21 9 9   | -3.35438    |
| 8 7 5 | -27.08578  | 6 5 5 1 | -0.92221    | 16 15 5 5   | -7.81185    | 22 21 10 10 | -3.10331    |
| 8 7 6 | -3.54995   | 6 5 5 2 | 1.85830     | 16 15 6 6   | -7.30164    | 22 21 11 11 | -6.11266    |
| 8 7 7 | -29.23048  | 6 5 5 3 | -3.10517    | 16 15 7 7   | 4.73896     | 22 21 12 12 | -3.12683    |
| 8 8 1 | -1.17641   | 6 5 5 4 | 5.20302     | 16 15 8 8   | -0.75867    | 22 21 13 13 | -5.16723    |
| 8 8 2 | -2.30828   | 6 5 5 5 | -12.28707   | 16 15 9 9   | 0.42916     | 22 21 14 14 | -5.58887    |
| 8 8 3 | 2.67588    | 6 6 1 1 | -3.93602    | 16 15 10 10 | -74.31006   | 22 21 15 15 | -6.89983    |
| 8 8 4 | -8.07054   | 6 6 2 1 | 1.47813     | 16 15 11 11 | -15.66856   | 22 21 16 16 | -12.04994   |
| 8 8 5 | 4.50700    | 6 6 2 2 | -2.74583    | 16 15 12 12 | 7.16511     | 22 21 17 17 | 16.40007    |
| 8 8 6 | 28.71870   | 6 6 3 1 | -11.87094   | 16 15 13 13 | 68.05103    | 22 21 18 18 | 12.58651    |
| 8 8 7 | -28.56176  | 6 6 3 2 | 5.31857     | 16 15 14 14 | 22.16824    | 22 21 19 19 | -1.75163    |
| 8 8 8 | -76.43517  | 6 6 3 3 | -46.75337   | 16 15 15 12 | 62.72393    | 22 21 20 20 | -8.90380    |
| 9 1 1 | 5.99837    | 6 6 4 1 | -0.42931    | 16 15 15 13 | -2.63411    | 22 21 21 17 | 2.44862     |
| 9 2 1 | 1.47855    | 6 6 4 2 | 0.97819     | 16 15 15 14 | 2.39856     | 22 21 21 18 | -18.93176   |
| 9 2 2 | -10.10708  | 6 6 4 3 | 1.68053     | 16 15 15 15 | 1.06259     | 22 21 21 19 | -6.55307    |
| 9 3 1 | -2.45049   | 6 6 4 4 | 4.07799     | 16 16 1 1   | -43.38262   | 22 21 21 20 | 4.81516     |
| 9 3 2 | -1.53879   | 6 6 5 1 | 0.71886     | 16 16 2 1   | 4.05262     | 22 21 21 21 | 15.79956    |
| 9 3 3 | -1.87700   | 6 6 5 2 | 1.65098     | 16 16 2 2   | -115.91845  | 22 22 1 1   | -1.85968    |
| 9 4 1 | 19.80707   | 6 6 5 3 | 2.66607     | 16 16 3 1   | -3.65752    | 22 22 2 1   | 1.80801     |
| 9 4 2 | -8.55016   | 6 6 5 4 | -6.48556    | 16 16 3 2   | -8.13043    | 22 22 2 2   | -40.65944   |
| 9 4 3 | 45.47609   | 6 6 5 5 | 8.77361     | 16 16 3 3   | -58.12613   | 22 22 3 1   | -0.32169    |
| 9 4 4 | -2.87019   | 6 6 6 1 | -0.13042    | 16 16 4 1   | -0.76160    | 22 22 3 2   | -4.86749    |
| 9 5 1 | -14.74745  | 6 6 6 2 | 2.55914     | 16 16 4 2   | 0.34975     | 22 22 3 3   | -6.19640    |
| 9 5 2 | 0.25887    | 6 6 6 3 | -1.78759    | 16 16 4 3   | -3.38780    | 22 22 4 1   | 0.11776     |
| 9 5 3 | -49.04674  | 6 6 6 4 | 4.11207     | 16 16 4 4   | -12.21206   | 22 22 4 2   | 0.93894     |
| 9 5 4 | 1.22477    | 6 6 6 5 | -9.42348    | 16 16 5 1   | 0.97293     | 22 22 4 3   | -1.16335    |
| 9 5 5 | 41.33436   | 6 6 6 6 | 0.84273     | 16 16 5 2   | -1.17486    | 22 22 4 4   | 41.17427    |
| 9 6 1 | 4.34520    | 7 1 1 1 | 17.28547    | 16 16 5 3   | 2.83776     | 22 22 5 1   | 0.30734     |
| 9 6 2 | -10.70352  | 7 2 1 1 | 1.25703     | 16 16 5 4   | -1.68557    | 22 22 5 3   | 1.79607     |
| 9 6 3 | 38.57880   | 7 2 2 1 | 0.50404     | 16 16 5 5   | -9.78812    | 22 22 5 4   | 20.23808    |
| 9 6 4 | 7.53652    | 7 2 2 2 | -8.08828    | 16 16 6 1   | 0.18727     | 22 22 5 5   | 15.50068    |
| 9 6 5 | 18.74838   | 7 3 1 1 | -4.06614    | 16 16 6 2   | -2.17059    | 22 22 6 1   | -0.55111    |
| 9 6 6 | 26.77768   | 7 3 2 2 | -0.93039    | 16 16 6 3   | -1.38611    | 22 22 6 2   | 0.48317     |
| 9 7 1 | 7.45902    | 7 3 3 1 | 1.95571     | 16 16 6 4   | 1.89929     | 22 22 6 3   | -1.64922    |
| 9 7 2 | -3.98043   | 7 3 3 2 | -0.86105    | 16 16 6 5   | -11.12930   | 22 22 6 4   | -11.72005   |
| 9 7 3 | 37.24750   | 7 3 3 3 | 4.90096     | 16 16 6 6   | -10.51207   | 22 22 6 5   | -1.64675    |
| 9 7 4 | -4.56695   | 7 4 1 1 | -3.12702    | 16 16 7 1   | 1.07661     | 22 22 6 6   | 5.06071     |
| 9 7 5 | -3.04211   | 7 4 2 2 | -0.40495    | 16 16 7 2   | 1.86148     | 22 22 7 1   | -1.81971    |
| 9 7 6 | 16.81970   | 7 4 3 3 | -46.08234   | 16 16 7 3   | -1.77243    | 22 22 7 2   | -0.19155    |
| 9 7 7 | 15.81082   | 7 4 4 1 | 0.72727     | 16 16 7 4   | 8.04656     | 22 22 7 3   | -0.55022    |
| 9 8 1 | -4.65445   | 7 4 4 2 | -0.76879    | 16 16 7 5   | -2.69674    | 22 22 7 4   | 0.35026     |



| I  | J  | K | F(I,J,K)   | I | J | K | L | F(I,J,K,L) | I  | J  | K  | L  | F(I,J,K,L) | I  | J  | K  | L  | F(I,J,K,L) |
|----|----|---|------------|---|---|---|---|------------|----|----|----|----|------------|----|----|----|----|------------|
| 9  | 8  | 2 | 0.35450    | 7 | 4 | 4 | 3 | 3.96720    | 16 | 16 | 7  | 6  | -2.42282   | 22 | 22 | 7  | 5  | 4.87065    |
| 9  | 8  | 3 | 2.37489    | 7 | 4 | 4 | 4 | 10.13214   | 16 | 16 | 7  | 7  | -14.13604  | 22 | 22 | 7  | 6  | 3.11365    |
| 9  | 8  | 4 | -28.46321  | 7 | 5 | 1 | 1 | 3.99348    | 16 | 16 | 8  | 1  | -0.89817   | 22 | 22 | 7  | 7  | 3.19675    |
| 9  | 8  | 5 | -19.71445  | 7 | 5 | 2 | 2 | 0.64615    | 16 | 16 | 8  | 4  | 7.58992    | 22 | 22 | 8  | 1  | -0.80775   |
| 9  | 8  | 6 | -6.08725   | 7 | 5 | 3 | 3 | 52.53906   | 16 | 16 | 8  | 5  | 4.98053    | 22 | 22 | 8  | 2  | 1.04457    |
| 9  | 8  | 8 | 2.54913    | 7 | 5 | 4 | 4 | -2.72936   | 16 | 16 | 8  | 6  | 1.81253    | 22 | 22 | 8  | 3  | -2.28212   |
| 9  | 9  | 1 | 3.76132    | 7 | 5 | 5 | 1 | 0.36607    | 16 | 16 | 8  | 7  | -2.16311   | 22 | 22 | 8  | 4  | 13.95769   |
| 9  | 9  | 2 | -5.73652   | 7 | 5 | 5 | 2 | -0.58461   | 16 | 16 | 8  | 8  | -9.84839   | 22 | 22 | 8  | 5  | 7.66087    |
| 9  | 9  | 3 | 20.39287   | 7 | 5 | 5 | 3 | 1.09063    | 16 | 16 | 9  | 1  | -0.41203   | 22 | 22 | 8  | 6  | -10.72578  |
| 9  | 9  | 4 | -9.30985   | 7 | 5 | 5 | 4 | 5.98833    | 16 | 16 | 9  | 2  | 1.26234    | 22 | 22 | 8  | 7  | 13.48787   |
| 9  | 9  | 5 | 2.96972    | 7 | 5 | 5 | 5 | -6.81956   | 16 | 16 | 9  | 3  | 1.21911    | 22 | 22 | 8  | 8  | 12.06492   |
| 9  | 9  | 6 | 10.28290   | 7 | 6 | 1 | 1 | -2.86054   | 16 | 16 | 9  | 4  | 0.61370    | 22 | 22 | 9  | 1  | 0.93473    |
| 9  | 9  | 7 | 1.62278    | 7 | 6 | 2 | 2 | -0.05468   | 16 | 16 | 9  | 5  | -4.68989   | 22 | 22 | 9  | 2  | -0.38000   |
| 9  | 9  | 8 | -22.55319  | 7 | 6 | 3 | 3 | -38.52979  | 16 | 16 | 9  | 6  | 1.06075    | 22 | 22 | 9  | 3  | -1.71606   |
| 9  | 9  | 9 | 3.80799    | 7 | 6 | 4 | 4 | 4.92486    | 16 | 16 | 9  | 7  | 3.14832    | 22 | 22 | 9  | 4  | 9.40406    |
| 10 | 10 | 1 | 126.21245  | 7 | 6 | 5 | 5 | 8.12072    | 16 | 16 | 9  | 8  | 2.29109    | 22 | 22 | 9  | 5  | 4.66095    |
| 10 | 10 | 2 | -58.28203  | 7 | 6 | 6 | 1 | -0.05778   | 16 | 16 | 9  | 9  | 1.52198    | 22 | 22 | 9  | 6  | 1.25857    |
| 10 | 10 | 3 | 478.27966  | 7 | 6 | 6 | 2 | -0.57511   | 16 | 16 | 10 | 10 | 49.19125   | 22 | 22 | 9  | 7  | -1.51694   |
| 10 | 10 | 4 | -7.43370   | 7 | 6 | 6 | 3 | -0.56253   | 16 | 16 | 11 | 10 | -19.00411  | 22 | 22 | 9  | 8  | -1.40810   |
| 10 | 10 | 5 | -4.51684   | 7 | 6 | 6 | 4 | 5.78809    | 16 | 16 | 11 | 11 | 17.83992   | 22 | 22 | 9  | 9  | -3.73205   |
| 10 | 10 | 6 | 9.35362    | 7 | 6 | 6 | 5 | -1.78908   | 16 | 16 | 12 | 12 | 65.61207   | 22 | 22 | 10 | 10 | -5.77938   |
| 10 | 10 | 7 | -21.09517  | 7 | 6 | 6 | 6 | 3.49830    | 16 | 16 | 13 | 12 | 23.06781   | 22 | 22 | 11 | 10 | -7.93695   |
| 10 | 10 | 8 | 9.05562    | 7 | 7 | 1 | 1 | -2.49002   | 16 | 16 | 13 | 13 | 75.98737   | 22 | 22 | 11 | 11 | -35.98833  |
| 10 | 10 | 9 | 4.62618    | 7 | 7 | 2 | 1 | 1.02899    | 16 | 16 | 14 | 12 | -1.89139   | 22 | 22 | 12 | 12 | 1.88678    |
| 11 | 10 | 1 | -60.29913  | 7 | 7 | 2 | 2 | -1.07343   | 16 | 16 | 14 | 13 | 3.90641    | 22 | 22 | 13 | 12 | 4.51657    |
| 11 | 10 | 2 | 27.74083   | 7 | 7 | 3 | 1 | -8.39702   | 16 | 16 | 14 | 14 | 37.16250   | 22 | 22 | 13 | 13 | 4.01808    |
| 11 | 10 | 3 | -222.67211 | 7 | 7 | 3 | 2 | 4.02067    | 16 | 16 | 15 | 12 | 8.14408    | 22 | 22 | 14 | 12 | 3.64176    |
| 11 | 10 | 4 | 21.55625   | 7 | 7 | 3 | 3 | -33.53373  | 16 | 16 | 15 | 13 | 32.07615   | 22 | 22 | 14 | 13 | -2.22573   |
| 11 | 10 | 5 | -8.53822   | 7 | 7 | 4 | 1 | 3.05355    | 16 | 16 | 15 | 14 | 32.86812   | 22 | 22 | 14 | 14 | -10.80703  |
| 11 | 10 | 6 | 13.87260   | 7 | 7 | 4 | 2 | -0.26266   | 16 | 16 | 15 | 15 | 52.68432   | 22 | 22 | 15 | 12 | 0.75609    |
| 11 | 10 | 7 | 2.75020    | 7 | 7 | 4 | 3 | 4.29522    | 16 | 16 | 16 | 12 | 36.17762   | 22 | 22 | 15 | 13 | 6.07097    |
| 11 | 10 | 8 | 13.97444   | 7 | 7 | 4 | 4 | 7.29001    | 16 | 16 | 16 | 13 | 21.36821   | 22 | 22 | 15 | 14 | 9.51958    |
| 11 | 10 | 9 | 2.73441    | 7 | 7 | 5 | 1 | -1.13128   | 16 | 16 | 16 | 14 | -2.64414   | 22 | 22 | 15 | 15 | -9.50234   |
| 11 | 11 | 1 | 24.10243   | 7 | 7 | 5 | 2 | 0.27931    | 16 | 16 | 16 | 15 | 10.21305   | 22 | 22 | 16 | 12 | 8.68925    |
| 11 | 11 | 2 | -10.40116  | 7 | 7 | 5 | 3 | -1.40406   | 16 | 16 | 16 | 16 | 78.68167   | 22 | 22 | 16 | 13 | 2.83182    |
| 11 | 11 | 3 | 101.90277  | 7 | 7 | 5 | 4 | -11.18362  | 17 | 17 | 1  | 1  | 34.87566   | 22 | 22 | 16 | 14 | 1.45297    |
| 11 | 11 | 4 | 49.75660   | 7 | 7 | 5 | 5 | 3.80534    | 17 | 17 | 2  | 1  | -16.21968  | 22 | 22 | 16 | 15 | 2.84352    |
| 11 | 11 | 5 | 55.04599   | 7 | 7 | 6 | 1 | -0.77121   | 17 | 17 | 2  | 2  | 7.69904    | 22 | 22 | 16 | 16 | -16.87300  |
| 11 | 11 | 6 | -46.81264  | 7 | 7 | 6 | 2 | 0.16296    | 17 | 17 | 3  | 1  | 133.64852  | 22 | 22 | 17 | 17 | -5.59609   |
| 11 | 11 | 7 | 33.15818   | 7 | 7 | 6 | 3 | -0.14913   | 17 | 17 | 3  | 2  | -61.86488  | 22 | 22 | 18 | 17 | -0.58734   |
| 11 | 11 | 8 | 50.91372   | 7 | 7 | 6 | 4 | 0.45828    | 17 | 17 | 3  | 3  | 509.77319  | 22 | 22 | 18 | 18 | 25.12321   |
| 11 | 11 | 9 | -5.94878   | 7 | 7 | 6 | 5 | -1.62843   | 17 | 17 | 4  | 1  | -5.35119   | 22 | 22 | 19 | 17 | -2.22861   |
| 12 | 12 | 1 | 158.59328  | 7 | 7 | 6 | 6 | 5.31378    | 17 | 17 | 4  | 2  | 1.78223    | 22 | 22 | 19 | 18 | 1.86279    |
| 12 | 12 | 2 | -248.55137 | 7 | 7 | 7 | 1 | -0.75471   | 17 | 17 | 4  | 3  | -15.95801  | 22 | 22 | 19 | 19 | 18.63564   |
| 12 | 12 | 3 | 157.74075  | 7 | 7 | 7 | 2 | -0.33866   | 17 | 17 | 4  | 4  | -72.60704  | 22 | 22 | 20 | 17 | 2.14799    |
| 12 | 12 | 4 | 7.42005    | 7 | 7 | 7 | 3 | 1.94920    | 17 | 17 | 5  | 1  | 3.53425    | 22 | 22 | 20 | 18 | 0.33173    |
| 12 | 12 | 5 | 3.36817    | 7 | 7 | 7 | 4 | -7.43351   | 17 | 17 | 5  | 2  | -0.88297   | 22 | 22 | 20 | 19 | 7.15100    |
| 12 | 12 | 6 | 6.50938    | 7 | 7 | 7 | 5 | -2.99714   | 17 | 17 | 5  | 3  | 9.21954    | 22 | 22 | 20 | 20 | 5.82253    |
| 12 | 12 | 7 | -17.59012  | 7 | 7 | 7 | 6 | 9.35412    | 17 | 17 | 5  | 4  | 79.43454   | 22 | 22 | 21 | 17 | -1.53294   |
| 12 | 12 | 8 | 0.42177    | 7 | 7 | 7 | 7 | 11.71905   | 17 | 17 | 5  | 5  | -93.78840  | 22 | 22 | 21 | 18 | -5.87733   |
| 12 | 12 | 9 | -0.55494   | 8 | 1 | 1 | 1 | 11.41795   | 17 | 17 | 6  | 1  | -2.16348   | 22 | 22 | 21 | 19 | -1.90190   |
| 13 | 12 | 1 | -157.68394 | 8 | 2 | 1 | 1 | 0.95668    | 17 | 17 | 6  | 2  | 0.41482    | 22 | 22 | 21 | 20 | 3.88286    |
| 13 | 12 | 2 | -303.48294 | 8 | 2 | 2 | 1 | 0.13315    | 17 | 17 | 6  | 3  | -5.39535   | 22 | 22 | 21 | 21 | 23.11420   |
| 13 | 12 | 3 | -112.42403 | 8 | 2 | 2 | 2 | -3.19622   | 17 | 17 | 6  | 4  | -59.47212  | 22 | 22 | 22 | 17 | 0.65705    |
| 13 | 12 | 4 | 4.52369    | 8 | 3 | 1 | 1 | -2.84804   | 17 | 17 | 6  | 5  | 68.69969   | 22 | 22 | 22 | 18 | 9.77907    |
| 13 | 12 | 5 | 4.42167    | 8 | 3 | 2 | 2 | -0.50529   | 17 | 17 | 6  | 6  | -50.70210  | 22 | 22 | 22 | 19 | 11.77397   |
| 13 | 12 | 6 | 15.94949   | 8 | 3 | 3 | 1 | 1.52127    | 17 | 17 | 7  | 1  | 0.95842    | 22 | 22 | 22 | 20 | -2.37182   |
| 13 | 12 | 7 | 2.81582    | 8 | 3 | 3 | 2 | -0.21939   | 17 | 17 | 7  | 2  | -0.91754   | 22 | 22 | 22 | 21 | 30.29807   |
| 13 | 12 | 8 | 5.89826    | 8 | 3 | 3 | 3 | 2.50242    | 17 | 17 | 7  | 3  | 6.05791    | 22 | 22 | 22 | 22 | 100.64628  |
| 13 | 12 | 9 | 1.64830    | 8 | 4 | 1 | 1 | 0.56957    | 17 | 17 | 7  | 4  | -50.56633  | 23 | 17 | 1  | 1  | 2.19038    |
| 13 | 13 | 1 | 249.78998  | 8 | 4 | 2 | 2 | 0.26867    | 17 | 17 | 7  | 5  | 57.26670   | 23 | 17 | 2  | 2  | 0.19847    |
| 13 | 13 | 2 | -392.74645 | 8 | 4 | 3 | 3 | -0.26187   | 17 | 17 | 7  | 6  | -41.85744  | 23 | 17 | 3  | 3  | -0.35025   |
| 13 | 13 | 3 | -54.77134  | 8 | 4 | 4 | 1 | 0.89743    | 17 | 17 | 7  | 7  | -36.62698  | 23 | 17 | 4  | 4  | -1.04994   |
| 13 | 13 | 4 | 20.08092   | 8 | 4 | 4 | 2 | 0.40856    | 17 | 17 | 8  | 1  | 0.80209    | 23 | 17 | 5  | 5  | -2.56054   |
| 13 | 13 | 5 | 12.38039   | 8 | 4 | 4 | 3 | -1.09663   | 17 | 17 | 8  | 2  | -0.26150   | 23 | 17 | 6  | 6  | -0.32744   |
| 13 | 13 | 6 | 4.03745    | 8 | 4 | 4 | 4 | 13.13908   | 17 | 17 | 8  | 3  | 3.15767    | 23 | 17 | 7  | 7  | -0.72556   |
| 13 | 13 | 7 | -9.82667   | 8 | 5 | 2 | 2 | 1.13471    | 17 | 17 | 8  | 4  | -0.33018   | 23 | 17 | 8  | 8  | 0.44751    |
| 13 | 13 | 8 | -5.20179   | 8 | 5 | 3 | 3 | -1.17015   | 17 | 17 | 8  | 5  | -1.37255   | 23 | 17 | 9  | 9  | -0.34932   |
| 13 | 13 | 9 | -2.70917   | 8 | 5 | 4 | 4 | 9.17788    | 17 | 17 | 8  | 6  | 0.34775    | 23 | 17 | 10 | 10 | -2.82825   |
| 14 | 12 | 1 | 165.08727  | 8 | 5 | 5 | 1 | -0.20080   | 17 | 17 | 8  | 7  | 1.10791    | 23 | 17 | 12 | 12 | -2.07362   |
| 14 | 12 | 2 | 3.20884    | 8 | 5 | 5 | 2 | 0.38740    | 17 | 17 | 8  | 8  | -0.83624   | 23 | 17 | 13 | 13 | -0.99985   |
| 14 | 12 | 3 | -210.78877 | 8 | 5 | 5 | 3 | -0.63255   | 17 | 17 | 9  | 1  | -0.95955   | 23 | 17 | 14 | 14 | 0.15311    |
| 14 | 12 | 4 | 9.29084    | 8 | 5 | 5 | 4 | 2.22117    | 17 | 17 | 9  | 2  | 0.17172    | 23 | 17 | 15 | 15 | 0.46848    |
| 14 | 12 | 5 | 2.50594    | 8 | 5 | 5 | 5 | -3.06801   | 17 | 17 | 9  | 3  | -2.47156   | 23 | 17 | 16 | 16 | -0.50847   |
| 14 | 12 | 6 | -10.95677  | 8 | 6 | 1 | 1 | -0.62500   | 17 | 17 | 9  | 4  | -29.48591  | 23 | 17 | 17 | 17 | -0.51190   |
| 14 | 12 | 8 | -6.86196   | 8 | 6 | 2 | 2 | 0.28361    | 17 | 17 | 9  | 5  | 35.04865   | 23 | 18 | 1  | 1  | 114.92287  |
| 14 | 12 | 9 | -7.54548   | 8 | 6 | 3 | 3 | 0.28753    | 17 | 17 | 9  | 6  | -25.80869  | 23 | 18 | 2  | 2  | -27.30059  |
| 14 | 13 | 1 | -286.91330 | 8 | 6 | 4 | 4 | -6.94526   | 17 | 17 | 9  | 7  | -21.04044  | 23 | 18 | 3  | 3  | 10.14112   |
| 14 | 13 | 2 | -76.85496  | 8 | 6 | 5 | 5 | -6.60680   | 17 | 17 | 9  | 8  | 0.55233    | 23 | 18 | 4  | 4  | 5.40412    |
| 14 | 13 | 3 | 152.73156  | 8 | 6 | 6 | 1 | 0.30606    | 17 | 17 | 9  | 9  | -13.86248  | 23 | 18 | 5  | 5  | -6.20729   |
| 14 | 13 | 4 | -5.94196   | 8 | 6 |   |   |            |    |    |    |    |            |    |    |    |    |            |

| I  | J  | K | FI(I,J,K)  | I | J | K | L | FI(I,J,K,L) | I  | J  | K  | L  | FI(I,J,K,L) | I  | J  | K  | L  | FI(I,J,K,L) |
|----|----|---|------------|---|---|---|---|-------------|----|----|----|----|-------------|----|----|----|----|-------------|
| 14 | 14 | 6 | 5.40496    | 8 | 7 | 4 | 4 | 9.76093     | 17 | 17 | 14 | 14 | -73.73714   | 23 | 18 | 14 | 14 | -16.89477   |
| 14 | 14 | 7 | 2.18850    | 8 | 7 | 5 | 5 | 0.26439     | 17 | 17 | 15 | 12 | 142.67130   | 23 | 18 | 15 | 15 | -5.76711    |
| 14 | 14 | 8 | 10.23540   | 8 | 7 | 6 | 6 | 0.28164     | 17 | 17 | 15 | 13 | -72.73204   | 23 | 18 | 16 | 16 | -4.03562    |
| 14 | 14 | 9 | 0.91739    | 8 | 7 | 7 | 1 | -1.32224    | 17 | 17 | 15 | 14 | -97.14064   | 23 | 18 | 17 | 17 | 3.42635     |
| 15 | 12 | 1 | 65.99779   | 8 | 7 | 7 | 3 | -1.18194    | 17 | 17 | 15 | 15 | -129.52176  | 23 | 18 | 18 | 17 | 0.13675     |
| 15 | 12 | 2 | -136.67785 | 8 | 7 | 7 | 4 | -4.99114    | 17 | 17 | 16 | 12 | -95.29757   | 23 | 18 | 18 | 18 | 1.32463     |
| 15 | 12 | 3 | -257.55929 | 8 | 7 | 7 | 5 | 0.59096     | 17 | 17 | 16 | 13 | 48.85926    | 23 | 19 | 1  | 1  | -161.35268  |
| 15 | 12 | 4 | 9.23890    | 8 | 7 | 7 | 6 | 1.22910     | 17 | 17 | 16 | 14 | 65.26026    | 23 | 19 | 2  | 2  | -53.85729   |
| 15 | 12 | 5 | 10.06329   | 8 | 7 | 7 | 7 | 3.79760     | 17 | 17 | 16 | 15 | 86.94208    | 23 | 19 | 3  | 3  | -6.42662    |
| 15 | 12 | 6 | -2.82863   | 8 | 8 | 1 | 1 | -0.98834    | 17 | 17 | 16 | 16 | -58.02414   | 23 | 19 | 4  | 4  | -12.86038   |
| 15 | 12 | 7 | 3.78354    | 8 | 8 | 2 | 1 | -0.11229    | 17 | 17 | 17 | 17 | 552.92118   | 23 | 19 | 5  | 5  | -3.93795    |
| 15 | 12 | 8 | -3.20626   | 8 | 8 | 2 | 2 | -1.08543    | 18 | 17 | 1  | 1  | -2.09607    | 23 | 19 | 6  | 6  | -4.04430    |
| 15 | 12 | 9 | -1.46694   | 8 | 8 | 3 | 1 | 0.12694     | 18 | 17 | 2  | 2  | 0.04047     | 23 | 19 | 7  | 7  | 0.47315     |
| 15 | 13 | 1 | -133.78156 | 8 | 8 | 3 | 2 | -0.11994    | 18 | 17 | 3  | 3  | -10.66185   | 23 | 19 | 8  | 8  | -3.06525    |
| 15 | 13 | 2 | -253.13435 | 8 | 8 | 3 | 3 | -0.81407    | 18 | 17 | 4  | 4  | 3.73815     | 23 | 19 | 9  | 9  | 0.72653     |
| 15 | 13 | 3 | 121.60754  | 8 | 8 | 4 | 1 | -0.91688    | 18 | 17 | 5  | 5  | -2.36429    | 23 | 19 | 10 | 10 | 0.31301     |
| 15 | 13 | 4 | 1.73789    | 8 | 8 | 4 | 2 | -0.29144    | 18 | 17 | 6  | 6  | -0.57554    | 23 | 19 | 11 | 11 | 5.57421     |
| 15 | 13 | 5 | 1.63931    | 8 | 8 | 4 | 3 | 0.18958     | 18 | 17 | 7  | 7  | 0.17092     | 23 | 19 | 12 | 12 | 10.13580    |
| 15 | 13 | 6 | 1.95926    | 8 | 8 | 4 | 4 | 3.37518     | 18 | 17 | 8  | 8  | 0.65474     | 23 | 19 | 13 | 13 | 20.03702    |
| 15 | 13 | 7 | -6.65654   | 8 | 8 | 5 | 2 | -0.41166    | 18 | 17 | 9  | 9  | -0.63776    | 23 | 19 | 14 | 14 | 24.36063    |
| 15 | 13 | 8 | 1.24065    | 8 | 8 | 5 | 3 | -0.45501    | 18 | 17 | 10 | 10 | -1.13813    | 23 | 19 | 15 | 15 | 12.42274    |
| 15 | 13 | 9 | 5.26836    | 8 | 8 | 5 | 4 | 7.16000     | 18 | 17 | 11 | 11 | 2.89585     | 23 | 19 | 16 | 16 | 5.34450     |
| 15 | 14 | 1 | 288.69927  | 8 | 8 | 5 | 5 | 8.44694     | 18 | 17 | 12 | 12 | -1.41550    | 23 | 19 | 17 | 17 | 5.62686     |
| 15 | 14 | 2 | -25.86560  | 8 | 8 | 6 | 1 | 0.85706     | 18 | 17 | 13 | 13 | -0.95180    | 23 | 19 | 18 | 18 | 9.44670     |
| 15 | 14 | 3 | 83.40492   | 8 | 8 | 6 | 2 | -0.55113    | 18 | 17 | 14 | 14 | -0.09584    | 23 | 19 | 19 | 17 | -2.04417    |
| 15 | 14 | 4 | -2.44310   | 8 | 8 | 6 | 3 | 0.09560     | 18 | 17 | 15 | 15 | 1.89228     | 23 | 19 | 19 | 18 | -10.67552   |
| 15 | 14 | 5 | 1.56575    | 8 | 8 | 6 | 4 | 1.89617     | 18 | 17 | 16 | 16 | -2.05935    | 23 | 19 | 19 | 19 | 21.19099    |
| 15 | 14 | 6 | 8.81065    | 8 | 8 | 6 | 5 | 4.04845     | 18 | 17 | 17 | 17 | -11.70938   | 23 | 20 | 1  | 1  | 84.84607    |
| 15 | 14 | 7 | 5.54969    | 8 | 8 | 6 | 6 | 3.24359     | 18 | 18 | 1  | 1  | -55.16148   | 23 | 20 | 2  | 2  | -64.66616   |
| 15 | 14 | 8 | -6.84867   | 8 | 8 | 7 | 1 | -0.39651    | 18 | 18 | 2  | 1  | -1.94249    | 23 | 20 | 3  | 3  | -3.57007    |
| 15 | 14 | 9 | -3.83784   | 8 | 8 | 7 | 2 | 0.30264     | 18 | 18 | 2  | 2  | -44.72925   | 23 | 20 | 4  | 4  | 1.28092     |
| 15 | 15 | 1 | 192.82868  | 8 | 8 | 7 | 3 | -0.60403    | 18 | 18 | 3  | 1  | 10.03240    | 23 | 20 | 5  | 5  | 2.02478     |
| 15 | 15 | 2 | -133.89648 | 8 | 8 | 7 | 4 | 3.81682     | 18 | 18 | 3  | 2  | -2.88511    | 23 | 20 | 6  | 6  | 1.97299     |
| 15 | 15 | 3 | 140.05700  | 8 | 8 | 7 | 5 | 2.76801     | 18 | 18 | 3  | 3  | -22.44358   | 23 | 20 | 7  | 7  | 0.78615     |
| 15 | 15 | 4 | -4.67001   | 8 | 8 | 7 | 6 | -0.67208    | 18 | 18 | 4  | 1  | 3.12178     | 23 | 20 | 8  | 8  | -0.34441    |
| 15 | 15 | 5 | -1.30392   | 8 | 8 | 7 | 7 | 1.53114     | 18 | 18 | 4  | 2  | 0.23666     | 23 | 20 | 9  | 9  | 0.70714     |
| 15 | 15 | 6 | -22.46968  | 8 | 8 | 8 | 1 | 0.82374     | 18 | 18 | 4  | 3  | 2.88386     | 23 | 20 | 10 | 10 | 1.22594     |
| 15 | 15 | 7 | 28.64638   | 8 | 8 | 8 | 2 | 0.26230     | 18 | 18 | 4  | 4  | 11.89082    | 23 | 20 | 11 | 11 | 1.78571     |
| 15 | 15 | 8 | -3.98707   | 8 | 8 | 8 | 3 | -0.16962    | 18 | 18 | 5  | 1  | -1.37918    | 23 | 20 | 12 | 12 | 2.60839     |
| 15 | 15 | 9 | -7.03485   | 8 | 8 | 8 | 4 | -0.51955    | 18 | 18 | 5  | 2  | -0.47597    | 23 | 20 | 13 | 13 | 2.67972     |
| 16 | 12 | 1 | 124.19887  | 8 | 8 | 8 | 5 | -1.33626    | 18 | 18 | 5  | 3  | 0.66035     | 23 | 20 | 14 | 14 | -11.30847   |
| 16 | 12 | 2 | -198.15212 | 8 | 8 | 8 | 6 | -3.55210    | 18 | 18 | 5  | 4  | -3.22125    | 23 | 20 | 15 | 15 | -1.30302    |
| 16 | 12 | 3 | 104.37374  | 8 | 8 | 8 | 7 | 3.82272     | 18 | 18 | 5  | 5  | 13.43959    | 23 | 20 | 16 | 16 | 0.32188     |
| 16 | 12 | 4 | 32.39879   | 8 | 8 | 8 | 8 | 1.92046     | 18 | 18 | 6  | 1  | -1.09118    | 23 | 20 | 17 | 17 | -8.85571    |
| 16 | 12 | 5 | -9.24499   | 9 | 1 | 1 | 1 | -0.62029    | 18 | 18 | 6  | 2  | -0.16188    | 23 | 20 | 18 | 18 | -3.58795    |
| 16 | 12 | 6 | 1.75548    | 9 | 2 | 2 | 1 | 0.34161     | 18 | 18 | 6  | 3  | -1.53683    | 23 | 20 | 19 | 19 | -0.54010    |
| 16 | 12 | 7 | -6.03834   | 9 | 2 | 2 | 2 | -7.75428    | 18 | 18 | 6  | 4  | -1.14919    | 23 | 20 | 20 | 17 | -3.22103    |
| 16 | 12 | 8 | -7.10347   | 9 | 3 | 1 | 1 | -0.14377    | 18 | 18 | 6  | 5  | 9.64729     | 23 | 20 | 20 | 18 | 1.13310     |
| 16 | 12 | 9 | -2.02752   | 9 | 3 | 2 | 2 | -0.88415    | 18 | 18 | 6  | 6  | 11.37030    | 23 | 20 | 20 | 19 | 14.05456    |
| 16 | 13 | 1 | -119.55061 | 9 | 3 | 3 | 1 | -0.94787    | 18 | 18 | 7  | 1  | -3.41286    | 23 | 20 | 20 | 20 | 10.53999    |
| 16 | 13 | 2 | -242.69621 | 9 | 3 | 3 | 2 | 0.06960     | 18 | 18 | 7  | 2  | 0.14393     | 23 | 21 | 1  | 1  | 140.04701   |
| 16 | 13 | 3 | -82.36290  | 9 | 3 | 3 | 3 | -2.53420    | 18 | 18 | 7  | 3  | 0.57554     | 23 | 21 | 2  | 2  | -19.35486   |
| 16 | 13 | 4 | -14.71488  | 9 | 4 | 1 | 1 | -1.08832    | 18 | 18 | 7  | 4  | -12.49812   | 23 | 21 | 3  | 3  | 16.27696    |
| 16 | 13 | 5 | 14.99923   | 9 | 4 | 3 | 3 | -27.33063   | 18 | 18 | 7  | 5  | 2.40288     | 23 | 21 | 4  | 4  | 1.75903     |
| 16 | 13 | 6 | -1.39965   | 9 | 4 | 4 | 1 | 2.26912     | 18 | 18 | 7  | 6  | 12.16319    | 23 | 21 | 5  | 5  | 5.71499     |
| 16 | 13 | 7 | 16.95293   | 9 | 4 | 4 | 2 | -0.36969    | 18 | 18 | 7  | 7  | 11.54592    | 23 | 21 | 6  | 6  | 4.52743     |
| 16 | 13 | 8 | -7.14973   | 9 | 4 | 4 | 3 | 1.60736     | 18 | 18 | 8  | 1  | -1.67959    | 23 | 21 | 7  | 7  | -2.70164    |
| 16 | 13 | 9 | 8.73640    | 9 | 4 | 4 | 4 | 13.55420    | 18 | 18 | 8  | 2  | 0.51647     | 23 | 21 | 8  | 8  | 0.33539     |
| 16 | 14 | 1 | 119.14788  | 9 | 5 | 1 | 1 | 2.02516     | 18 | 18 | 8  | 3  | -1.03483    | 23 | 21 | 9  | 9  | -2.15645    |
| 16 | 14 | 2 | -5.17159   | 9 | 5 | 2 | 2 | 0.69129     | 18 | 18 | 8  | 4  | -12.84101   | 23 | 21 | 10 | 10 | -1.80721    |
| 16 | 14 | 3 | -146.72455 | 9 | 5 | 3 | 3 | 32.38668    | 18 | 18 | 8  | 5  | -4.75727    | 23 | 21 | 11 | 11 | -1.14226    |
| 16 | 14 | 4 | -24.74655  | 9 | 5 | 4 | 4 | -3.92437    | 18 | 18 | 8  | 6  | -4.81255    | 23 | 21 | 12 | 12 | -3.95506    |
| 16 | 14 | 5 | 34.59802   | 9 | 5 | 5 | 1 | -0.39047    | 18 | 18 | 8  | 7  | 12.02350    | 23 | 21 | 13 | 13 | -9.40769    |
| 16 | 14 | 6 | 13.64094   | 9 | 5 | 5 | 2 | -0.85857    | 18 | 18 | 8  | 8  | 4.66822     | 23 | 21 | 14 | 14 | -22.55359   |
| 16 | 14 | 7 | -7.08309   | 9 | 5 | 5 | 3 | -1.98390    | 18 | 18 | 9  | 1  | 0.81519     | 23 | 21 | 15 | 15 | -10.74312   |
| 16 | 14 | 8 | 2.24666    | 9 | 5 | 5 | 4 | 8.78822     | 18 | 18 | 9  | 2  | 0.17083     | 23 | 21 | 16 | 16 | -5.94272    |
| 16 | 14 | 9 | 9.99140    | 9 | 5 | 5 | 5 | -0.99987    | 18 | 18 | 9  | 3  | -1.30269    | 23 | 21 | 17 | 17 | 7.90965     |
| 16 | 15 | 1 | 58.54413   | 9 | 6 | 1 | 1 | -2.36073    | 18 | 18 | 9  | 4  | 4.70359     | 23 | 21 | 18 | 18 | -2.00590    |
| 16 | 15 | 2 | -108.07509 | 9 | 6 | 2 | 2 | 0.38745     | 18 | 18 | 9  | 5  | 2.84384     | 23 | 21 | 19 | 19 | -13.90446   |
| 16 | 15 | 3 | -175.00734 | 9 | 6 | 3 | 3 | -23.85159   | 18 | 18 | 9  | 6  | 2.78333     | 23 | 21 | 20 | 20 | -2.35584    |
| 16 | 15 | 4 | -20.50544  | 9 | 6 | 4 | 4 | 0.26765     | 18 | 18 | 9  | 7  | 3.25653     | 23 | 21 | 21 | 17 | -1.26128    |
| 16 | 15 | 5 | -22.30011  | 9 | 6 | 5 | 5 | 10.18539    | 18 | 18 | 9  | 8  | -1.43472    | 23 | 21 | 21 | 18 | -16.43086   |
| 16 | 15 | 6 | -38.62083  | 9 | 6 | 6 | 1 | 0.14019     | 18 | 18 | 9  | 9  | -9.04014    | 23 | 21 | 21 | 19 | 13.11783    |
| 16 | 15 | 7 | -31.44112  | 9 | 6 | 6 | 2 | -0.82148    | 18 | 18 | 10 | 10 | -0.72923    | 23 | 21 | 21 | 20 | -3.92785    |
| 16 | 15 | 8 | 5.85961    | 9 | 6 | 6 | 3 | -1.18144    | 18 | 18 | 11 | 10 | -3.29753    | 23 | 21 | 21 | 21 | -12.64495   |
| 16 | 15 | 9 | 14.61646   | 9 | 6 | 6 | 4 | 7.26710     | 18 | 18 | 11 | 11 | -12.46131   | 23 | 22 | 1  | 1  | -13.22740   |
| 16 | 16 | 1 | 78.19937   | 9 | 6 | 6 | 6 | 6.74912     | 18 | 18 | 12 | 12 | -0.53073    | 23 | 22 | 2  | 2  | 27.24325    |
| 16 | 16 | 2 | -148.62108 | 9 | 7 | 1 | 1 | -1.29556    | 18 | 18 | 13 | 12 | -0.70882    | 23 | 22 | 3  | 3  | -1.43588    |
| 16 | 16 | 3 | 61.57115   | 9 | 7 | 2 | 2 | -0.72011    | 18 | 18 | 13 | 13 | 4.73408     | 23 | 22 | 4  | 4  | -9.77521    |
| 16 | 16 | 4 | -52.26277  | 9 | 7 | 3 | 3 | -19.44584   | 18 | 18 | 14 | 12 | 4.97969     | 23 | 22 | 5  | 5  | 2.573       |

| I J K    | FI(I,J,K)   | I J K L    | FI(I,J,K,L) | I J K L     | FI(I,J,K,L) | I J K L     | FI(I,J,K,L) |
|----------|-------------|------------|-------------|-------------|-------------|-------------|-------------|
| 17 14 10 | 240.66633   | 9 7 7 7    | 1.55827     | 18 18 16 15 | 6.54109     | 23 22 15 15 | -1.51735    |
| 17 14 11 | -112.23071  | 9 8 1 1    | -0.86132    | 18 18 16 16 | -27.51085   | 23 22 16 16 | -11.09425   |
| 17 15 10 | 321.46274   | 9 8 2 2    | 0.23634     | 18 18 17 17 | -19.46655   | 23 22 17 17 | -1.04326    |
| 17 15 11 | -142.51282  | 9 8 3 3    | 0.52175     | 18 18 18 17 | 0.10277     | 23 22 18 18 | 14.84334    |
| 17 16 10 | -228.37689  | 9 8 4 4    | -2.35295    | 18 18 18 18 | 28.33473    | 23 22 19 19 | -9.31188    |
| 17 16 11 | 101.97773   | 9 8 5 5    | -3.35680    | 19 17 1 1   | 1.64466     | 23 22 20 20 | -6.25024    |
| 17 17 1  | -349.79894  | 9 8 6 6    | -3.37699    | 19 17 2 2   | 0.37204     | 23 22 21 21 | 11.41291    |
| 17 17 2  | 161.40652   | 9 8 7 7    | -0.85381    | 19 17 3 3   | 3.25619     | 23 22 22 17 | 1.34339     |
| 17 17 3  | -1337.14010 | 9 8 8 1    | 0.82808     | 19 17 4 4   | 2.87135     | 23 22 22 18 | 4.01834     |
| 17 17 4  | 49.37731    | 9 8 8 3    | -0.20701    | 19 17 5 5   | 0.42693     | 23 22 22 19 | -14.56502   |
| 17 17 5  | -11.92960   | 9 8 8 4    | 3.48784     | 19 17 6 6   | -0.50829    | 23 22 22 20 | 4.43320     |
| 17 17 6  | 5.93813     | 9 8 8 5    | 0.98717     | 19 17 7 7   | 2.73927     | 23 22 22 21 | 8.06507     |
| 17 17 7  | -17.69160   | 9 8 8 7    | -1.07400    | 19 17 8 8   | -0.50183    | 23 22 22 22 | -6.13330    |
| 17 17 8  | -5.61907    | 9 8 8 8    | 0.31071     | 19 17 9 9   | -0.36116    | 23 23 1 1   | -246.70085  |
| 17 17 9  | -2.29889    | 9 9 1 1    | -1.33320    | 19 17 10 10 | -0.75673    | 23 23 2 1   | -18.52784   |
| 18 12 10 | -10.32111   | 9 9 2 1    | 0.35678     | 19 17 11 11 | 0.54955     | 23 23 2 2   | -21.91908   |
| 18 12 11 | 23.38986    | 9 9 2 2    | 0.06774     | 19 17 12 12 | 0.45874     | 23 23 3 1   | 63.75455    |
| 18 13 10 | 7.52066     | 9 9 3 1    | -3.37065    | 19 17 13 13 | 0.45782     | 23 23 3 2   | 2.49182     |
| 18 13 11 | 10.55959    | 9 9 3 2    | 1.62114     | 19 17 14 14 | -0.79363    | 23 23 3 3   | -18.38454   |
| 18 14 10 | 0.95902     | 9 9 3 3    | -12.75563   | 19 17 15 15 | -0.53442    | 23 23 4 1   | -1.62651    |
| 18 14 11 | 28.16390    | 9 9 4 1    | -0.57545    | 19 17 16 16 | -2.26311    | 23 23 4 2   | 0.28249     |
| 18 15 10 | 5.29231     | 9 9 4 2    | -0.50278    | 19 17 17 17 | 3.16194     | 23 23 4 3   | 0.49872     |
| 18 15 11 | 37.12574    | 9 9 4 3    | -0.51659    | 19 18 1 1   | 73.01942    | 23 23 4 4   | 10.44970    |
| 18 16 10 | -28.77545   | 9 9 4 4    | -0.16312    | 19 18 2 2   | -76.88825   | 23 23 5 1   | -2.81835    |
| 18 16 11 | -58.08345   | 9 9 5 1    | 0.69485     | 19 18 3 3   | -18.34447   | 23 23 5 3   | 1.17297     |
| 18 17 1  | 8.95263     | 9 9 5 2    | -0.57857    | 19 18 4 4   | -2.30739    | 23 23 5 4   | 3.09074     |
| 18 17 2  | -1.50626    | 9 9 5 3    | 0.92764     | 19 18 5 5   | 8.70867     | 23 23 5 5   | 5.64548     |
| 18 17 3  | 19.85493    | 9 9 5 4    | -1.33320    | 19 18 6 6   | 4.26048     | 23 23 6 1   | 2.83294     |
| 18 17 4  | 62.01151    | 9 9 5 5    | 2.87985     | 19 18 7 7   | -1.64146    | 23 23 6 2   | 0.36262     |
| 18 17 5  | -49.72741   | 9 9 6 1    | 0.21596     | 19 18 8 8   | -3.01731    | 23 23 6 3   | -1.16270    |
| 18 17 6  | 26.41249    | 9 9 6 2    | -0.47312    | 19 18 9 9   | 1.30699     | 23 23 6 4   | -2.99154    |
| 18 17 7  | 29.68645    | 9 9 6 3    | -0.59634    | 19 18 10 10 | 5.44622     | 23 23 6 5   | 0.75640     |
| 18 17 8  | -7.45638    | 9 9 6 4    | 3.63720     | 19 18 11 11 | 0.51790     | 23 23 6 6   | 8.24364     |
| 18 17 9  | 19.91181    | 9 9 6 5    | -3.24292    | 19 18 12 12 | 4.64057     | 23 23 7 1   | -6.22608    |
| 18 18 1  | 85.31614    | 9 9 6 6    | 1.69464     | 19 18 13 13 | 3.36009     | 23 23 7 2   | -0.51103    |
| 18 18 2  | -40.54906   | 9 9 7 1    | 0.53499     | 19 18 14 14 | -9.92567    | 23 23 7 3   | 1.38172     |
| 18 18 3  | 1.58790     | 9 9 7 2    | 0.19278     | 19 18 15 15 | 0.66753     | 23 23 7 4   | -1.71177    |
| 18 18 4  | 139.48113   | 9 9 7 3    | 4.29340     | 19 18 16 16 | 6.20351     | 23 23 7 5   | -2.64123    |
| 18 18 5  | 32.67684    | 9 9 7 4    | -3.43273    | 19 18 17 17 | -23.81358   | 23 23 7 6   | 5.17683     |
| 18 18 6  | 11.84813    | 9 9 7 5    | 0.61726     | 19 18 18 18 | 0.44850     | 23 23 7 7   | 4.09800     |
| 18 18 7  | -118.14631  | 9 9 7 6    | -1.24370    | 19 19 1 1   | -3.12117    | 23 23 8 1   | 1.45320     |
| 18 18 8  | -113.96786  | 9 9 8 1    | 0.20283     | 19 19 2 1   | -107.87928  | 23 23 8 2   | 0.51978     |
| 18 18 9  | 10.54412    | 9 9 8 2    | 0.21539     | 19 19 3 1   | -1.08372    | 23 23 8 3   | -0.70249    |
| 19 12 10 | -2.02960    | 9 9 8 3    | 0.12648     | 19 19 4 1   | -141.49001  | 23 23 8 4   | 0.56488     |
| 19 12 11 | -0.94232    | 9 9 8 4    | 1.35012     | 19 19 5 1   | 19.79147    | 23 23 8 5   | 2.17756     |
| 19 13 10 | 2.42077     | 9 9 8 5    | 0.14289     | 19 19 6 1   | -13.10456   | 23 23 8 6   | 0.42218     |
| 19 13 11 | 41.05458    | 9 9 8 6    | -0.70911    | 19 19 7 1   | -40.95513   | 23 23 8 7   | 5.04196     |
| 19 14 10 | 4.37096     | 9 9 8 7    | 0.31372     | 19 19 8 1   | -0.38084    | 23 23 8 8   | 3.28244     |
| 19 14 11 | 10.16193    | 9 9 9 1    | -0.11562    | 19 19 9 1   | 3.06748     | 23 23 8 9   | 5.65312     |
| 19 15 10 | -7.67670    | 9 9 9 2    | 0.27162     | 19 19 10 1  | 2.73930     | 23 23 9 1   | -2.04523    |
| 19 15 11 | -19.24011   | 9 9 9 3    | 0.32034     | 19 19 11 1  | 14.36374    | 23 23 9 2   | -0.35820    |
| 19 16 10 | -12.64870   | 9 9 9 4    | 0.85560     | 19 19 12 1  | -1.96529    | 23 23 9 3   | -0.48789    |
| 19 16 11 | 19.97417    | 9 9 9 5    | -1.92726    | 19 19 13 1  | 4.11808     | 23 23 9 4   | 0.77672     |
| 19 17 1  | -2.79787    | 9 9 9 6    | 0.68600     | 19 19 14 1  | -0.27778    | 23 23 9 5   | 3.08187     |
| 19 17 2  | 1.81351     | 9 9 9 7    | 1.50666     | 19 19 15 1  | 1.30787     | 23 23 9 6   | 2.59046     |
| 19 17 3  | -6.01842    | 9 9 9 8    | 1.12440     | 19 19 16 1  | 7.77286     | 23 23 9 7   | -1.66873    |
| 19 17 4  | 54.53291    | 9 9 9 9    | 4.56828     | 19 19 17 1  | 2.04897     | 23 23 9 8   | -1.48205    |
| 19 17 5  | -59.72315   | 10 10 1 1  | -21.90615   | 19 19 18 1  | 3.50556     | 23 23 9 9   | -1.98900    |
| 19 17 6  | 45.88207    | 10 10 2 1  | 10.09583    | 19 19 19 1  | 1.44973     | 23 23 10 1  | -9.19508    |
| 19 17 7  | 38.28237    | 10 10 3 1  | -4.73593    | 19 19 20 1  | -0.45794    | 23 23 10 2  | 7.59629     |
| 19 17 8  | 3.23770     | 10 10 4 1  | -83.18978   | 19 19 21 1  | -1.27802    | 23 23 10 3  | -9.67196    |
| 19 17 9  | 36.54301    | 10 10 5 1  | 38.20099    | 19 19 22 1  | 6.97206     | 23 23 10 4  | 20.01282    |
| 19 18 1  | -71.36702   | 10 10 6 1  | -316.02169  | 19 19 23 1  | 0.47734     | 23 23 10 5  | 19.70004    |
| 19 18 2  | -79.32366   | 10 10 7 1  | 1.76367     | 19 19 24 1  | -0.38033    | 23 23 10 6  | -28.58736   |
| 19 18 3  | 44.44557    | 10 10 8 1  | -1.16452    | 19 19 25 1  | 2.84582     | 23 23 10 7  | 36.91279    |
| 19 18 4  | -31.91023   | 10 10 9 1  | 9.83469     | 19 19 26 1  | 3.41448     | 23 23 10 8  | 11.62888    |
| 19 18 5  | 32.41503    | 10 10 10 1 | 8.21880     | 19 19 27 1  | -3.97581    | 23 23 10 9  | -13.71329   |
| 19 18 6  | 70.46234    | 10 10 11 1 | 0.47095     | 19 19 28 1  | 2.48447     | 23 23 10 10 | 26.07437    |
| 19 18 7  | 27.27016    | 10 10 12 1 | -0.16708    | 19 19 29 1  | 0.41935     | 23 23 10 11 | 11.91619    |
| 19 18 8  | 15.34177    | 10 10 13 1 | 1.20399     | 19 19 30 1  | 0.62425     | 23 23 10 12 | 9.70222     |
| 19 18 9  | 9.20947     | 10 10 14 1 | -16.94432   | 19 19 31 1  | -0.49161    | 23 23 10 13 | -8.48862    |
| 19 19 1  | 108.75062   | 10 10 15 1 | 16.19492    | 19 19 32 1  | 0.67569     | 23 23 10 14 | 10.60375    |
| 19 19 2  | -108.08357  | 10 10 16 1 | 0.12343     | 19 19 33 1  | 2.61721     | 23 23 10 15 | 9.47649     |
| 19 19 3  | -7.98033    | 10 10 17 1 | -0.97692    | 19 19 34 1  | 3.32893     | 23 23 10 16 | -5.37935    |
| 19 19 4  | -27.52487   | 10 10 18 1 | 14.42526    | 19 19 35 1  | -1.83130    | 23 23 10 17 | -1.51836    |
| 19 19 5  | 22.91012    | 10 10 19 1 | -14.21729   | 19 19 36 1  | 4.33426     | 23 23 10 18 | -0.18828    |
| 19 19 6  | -50.17389   | 10 10 20 1 | 10.17754    | 19 19 37 1  | 2.37039     | 23 23 10 19 | 19.34317    |
| 19 19 7  | -53.12323   | 10 10 21 1 | 0.76886     | 19 19 38 1  | 1.56979     | 23 23 10 20 | 0.11535     |
| 19 19 8  | -24.48713   | 10 10 22 1 | -0.18211    | 19 19 39 1  | -0.53524    | 23 23 10 21 | -18.83908   |
| 20 12 10 | 1.45291     | 10 10 23 1 | 1.04005     | 19 19 40 1  | -1.30940    | 23 23 10 22 | 30.28903    |
| 20 12 11 | 21.24771    | 10 10 24 1 | 11.27445    | 19 19 41 1  | 2.09459     | 23 23 10 23 | 0.17300     |
| 20 13 10 | -1.35283    | 10 10 25 1 | -13.67667   | 19 19 42 1  | -1.42039    | 23 23 10 24 | 11.05497    |
| 20 13 11 | 6.24829     | 10 10 26 1 | 10.18903    | 19 19 43 1  | 0.77927     | 23 23 10 25 | -10.10936   |
| 20 14 10 | -3.03238    | 10 10 27 1 | 5.79089     | 19 19 44 1  | 2.62268     | 23 23 10 26 | 10.98120    |
| 20 14 11 | 5.21782     | 10 10 28 1 | -0.30722    | 19 19 45 1  | 2.09819     | 23 23 10 27 | -0.47351    |
| 20 15 10 | 1.20092     | 10 10 29 1 | 0.35704     | 19 19 46 1  | -1.27783    | 23 23 10 28 | 20.20489    |
| 20 15 11 | 5.00132     | 10 10 30 1 | -1.43225    | 19 19 47 1  | 3.95765     | 23 23 10 29 | -23.77971   |
| 20 16 10 | 17.36141    | 10 10 31 1 | -1.47645    | 19 19 48 1  | -4.68602    | 23 23 10 30 | 11.37507    |
| 20 16 11 | 21.05495    | 10 10 32 1 | -0.61740    | 19 19 49 1  | -12.23413   | 23 23 10 31 | 30.31149    |

| I  | J  | K  | FI(I,J,K)  | I  | J  | K  | L  | FI(I,J,K,L) | I  | J  | K  | L  | FI(I,J,K,L) | I  | J  | K  | L  | FI(I,J,K,L) |
|----|----|----|------------|----|----|----|----|-------------|----|----|----|----|-------------|----|----|----|----|-------------|
| 20 | 17 | 1  | -2.97486   | 10 | 10 | 8  | 7  | 0.25300     | 19 | 19 | 12 | 12 | 12.74688    | 23 | 23 | 22 | 17 | 0.37678     |
| 20 | 17 | 2  | 1.23398    | 10 | 10 | 8  | 8  | -2.36036    | 19 | 19 | 13 | 12 | 6.66016     | 23 | 23 | 22 | 18 | 1.63464     |
| 20 | 17 | 3  | -10.39879  | 10 | 10 | 9  | 1  | -0.37772    | 19 | 19 | 13 | 13 | 21.72036    | 23 | 23 | 22 | 19 | 2.38075     |
| 20 | 17 | 4  | -107.18995 | 10 | 10 | 9  | 2  | 0.09023     | 19 | 19 | 14 | 12 | 7.26371     | 23 | 23 | 22 | 20 | -0.89228    |
| 20 | 17 | 5  | 111.26328  | 10 | 10 | 9  | 3  | -1.93538    | 19 | 19 | 14 | 13 | -8.05224    | 23 | 23 | 22 | 21 | -1.84537    |
| 20 | 17 | 6  | -84.47750  | 10 | 10 | 9  | 4  | 9.34366     | 19 | 19 | 14 | 14 | 12.85390    | 23 | 23 | 22 | 22 | 17.09197    |
| 20 | 17 | 7  | -74.04515  | 10 | 10 | 9  | 5  | -9.47216    | 19 | 19 | 15 | 12 | 7.87358     | 23 | 23 | 23 | 17 | 0.45866     |
| 20 | 17 | 8  | 1.53986    | 10 | 10 | 9  | 6  | 6.98161     | 19 | 19 | 15 | 13 | 4.45292     | 23 | 23 | 23 | 18 | -33.35370   |
| 20 | 17 | 9  | -58.50535  | 10 | 10 | 9  | 7  | 6.39448     | 19 | 19 | 15 | 14 | 12.82372    | 23 | 23 | 23 | 19 | 42.85167    |
| 20 | 18 | 1  | 24.67112   | 10 | 10 | 9  | 8  | -0.40588    | 19 | 19 | 15 | 15 | 6.18367     | 23 | 23 | 23 | 20 | -18.67265   |
| 20 | 18 | 2  | -69.31876  | 10 | 10 | 9  | 9  | 2.16123     | 19 | 19 | 16 | 12 | 12.77856    | 23 | 23 | 23 | 21 | -48.01528   |
| 20 | 18 | 3  | -75.13590  | 10 | 10 | 10 | 10 | 267.38751   | 19 | 19 | 16 | 13 | 4.76226     | 23 | 23 | 23 | 22 | 1.71056     |
| 20 | 18 | 4  | -11.11635  | 11 | 10 | 1  | 1  | 9.25881     | 19 | 19 | 16 | 14 | 5.22782     | 23 | 23 | 23 | 23 | 78.47819    |
| 20 | 18 | 5  | 12.20990   | 11 | 10 | 2  | 2  | 1.65719     | 19 | 19 | 16 | 15 | 6.56453     | 24 | 17 | 1  | 1  | 0.60320     |
| 20 | 18 | 6  | -9.08294   | 11 | 10 | 3  | 3  | 135.45159   | 19 | 19 | 16 | 16 | -2.25753    | 24 | 17 | 2  | 2  | -0.27963    |
| 20 | 18 | 7  | 4.28718    | 11 | 10 | 4  | 4  | -13.79354   | 19 | 19 | 17 | 17 | -34.02238   | 24 | 17 | 3  | 3  | -0.52795    |
| 20 | 18 | 8  | 10.44534   | 11 | 10 | 5  | 5  | -7.06081    | 19 | 19 | 18 | 17 | -1.34007    | 24 | 17 | 4  | 4  | -3.10997    |
| 20 | 18 | 9  | -7.37684   | 11 | 10 | 6  | 6  | -5.07856    | 19 | 19 | 18 | 18 | 8.29425     | 24 | 17 | 5  | 5  | -2.24570    |
| 20 | 19 | 1  | -55.96550  | 11 | 10 | 7  | 7  | -3.78036    | 19 | 19 | 19 | 17 | 2.05588     | 24 | 17 | 6  | 6  | -1.10029    |
| 20 | 19 | 2  | -130.26317 | 11 | 10 | 8  | 8  | -1.28154    | 19 | 19 | 19 | 18 | 3.12028     | 24 | 17 | 7  | 7  | -1.40679    |
| 20 | 19 | 3  | -69.27907  | 11 | 10 | 9  | 9  | -1.37335    | 19 | 19 | 19 | 19 | 25.90319    | 24 | 17 | 8  | 8  | 0.58402     |
| 20 | 19 | 4  | 19.93322   | 11 | 10 | 10 | 10 | -123.60235  | 20 | 17 | 1  | 1  | -0.10473    | 24 | 17 | 9  | 9  | 0.39392     |
| 20 | 19 | 5  | 9.44021    | 11 | 11 | 1  | 1  | -4.22790    | 20 | 17 | 2  | 2  | 0.30635     | 24 | 17 | 10 | 10 | 0.10148     |
| 20 | 19 | 6  | 28.10797   | 11 | 11 | 2  | 1  | 1.75057     | 20 | 17 | 3  | 3  | 6.59247     | 24 | 17 | 11 | 11 | 0.25320     |
| 20 | 19 | 7  | 10.81138   | 11 | 11 | 2  | 2  | -0.69630    | 20 | 17 | 4  | 4  | -7.20080    | 24 | 17 | 12 | 12 | -0.63866    |
| 20 | 19 | 8  | 0.43866    | 11 | 11 | 3  | 1  | -14.64596   | 20 | 17 | 5  | 5  | 3.22676     | 24 | 17 | 13 | 13 | -0.37181    |
| 20 | 19 | 9  | -7.50406   | 11 | 11 | 3  | 2  | 6.83023     | 20 | 17 | 6  | 6  | 1.72833     | 24 | 17 | 14 | 14 | 0.39962     |
| 20 | 20 | 1  | 61.93231   | 11 | 11 | 3  | 3  | -56.07476   | 20 | 17 | 7  | 7  | -2.65209    | 24 | 17 | 15 | 15 | 1.27298     |
| 20 | 20 | 2  | -178.26971 | 11 | 11 | 4  | 1  | 0.14918     | 20 | 17 | 8  | 8  | -0.11304    | 24 | 17 | 17 | 17 | -0.55710    |
| 20 | 20 | 3  | 92.12389   | 11 | 11 | 4  | 3  | 2.88085     | 20 | 17 | 9  | 9  | 0.87278     | 24 | 18 | 1  | 1  | 39.18860    |
| 20 | 20 | 4  | 6.18389    | 11 | 11 | 4  | 4  | -22.83414   | 20 | 17 | 10 | 10 | 0.13202     | 24 | 18 | 2  | 2  | 24.56104    |
| 20 | 20 | 5  | 10.66534   | 11 | 11 | 5  | 1  | -0.53601    | 20 | 17 | 11 | 11 | -2.03743    | 24 | 18 | 3  | 3  | 15.81957    |
| 20 | 20 | 6  | 42.90627   | 11 | 11 | 5  | 2  | 0.97241     | 20 | 17 | 12 | 12 | -0.91895    | 24 | 18 | 4  | 4  | -6.28910    |
| 20 | 20 | 7  | -25.30961  | 11 | 11 | 5  | 3  | -2.59043    | 20 | 17 | 14 | 14 | 1.13660     | 24 | 18 | 5  | 5  | -1.53975    |
| 20 | 20 | 8  | -10.70815  | 11 | 11 | 5  | 4  | -14.32722   | 20 | 17 | 15 | 15 | -0.28623    | 24 | 18 | 6  | 6  | 1.77551     |
| 20 | 20 | 9  | -7.86771   | 11 | 11 | 5  | 5  | -14.48302   | 20 | 17 | 16 | 16 | 2.72951     | 24 | 18 | 7  | 7  | -4.95082    |
| 21 | 12 | 10 | 6.10981    | 11 | 11 | 6  | 1  | 0.86050     | 20 | 17 | 17 | 17 | 7.70647     | 24 | 18 | 8  | 8  | -2.86624    |
| 21 | 12 | 11 | -12.96270  | 11 | 11 | 6  | 2  | 0.37646     | 20 | 18 | 1  | 1  | -36.94124   | 24 | 18 | 9  | 9  | -0.88873    |
| 21 | 13 | 10 | -3.88005   | 11 | 11 | 6  | 3  | 1.61570     | 20 | 18 | 2  | 2  | -92.53886   | 24 | 18 | 10 | 10 | -4.49295    |
| 21 | 13 | 11 | -12.14310  | 11 | 11 | 6  | 4  | 7.91955     | 20 | 18 | 3  | 3  | 35.83553    | 24 | 18 | 11 | 11 | 1.09599     |
| 21 | 14 | 10 | 7.09553    | 11 | 11 | 6  | 5  | 2.58110     | 20 | 18 | 4  | 4  | -3.56922    | 24 | 18 | 12 | 12 | -6.82855    |
| 21 | 14 | 11 | 9.93671    | 11 | 11 | 6  | 6  | -7.81106    | 20 | 18 | 5  | 5  | -7.60951    | 24 | 18 | 13 | 13 | -8.96917    |
| 21 | 15 | 10 | -5.11298   | 11 | 11 | 7  | 1  | 0.18517     | 20 | 18 | 6  | 6  | -4.54207    | 24 | 18 | 14 | 14 | -8.70651    |
| 21 | 15 | 11 | 40.19235   | 11 | 11 | 7  | 3  | -1.09170    | 20 | 18 | 7  | 7  | -4.69149    | 24 | 18 | 15 | 15 | -6.52424    |
| 21 | 16 | 10 | -20.89824  | 11 | 11 | 7  | 4  | -1.99306    | 20 | 18 | 8  | 8  | -0.55059    | 24 | 18 | 16 | 16 | -2.56637    |
| 21 | 16 | 11 | 19.73486   | 11 | 11 | 7  | 5  | -3.86443    | 20 | 18 | 9  | 9  | -0.87790    | 24 | 18 | 17 | 17 | 13.88134    |
| 21 | 17 | 1  | 6.89395    | 11 | 11 | 7  | 6  | 3.85798     | 20 | 18 | 10 | 10 | -8.99021    | 24 | 18 | 18 | 17 | -1.16441    |
| 21 | 17 | 2  | -3.25697   | 11 | 11 | 7  | 7  | -3.05089    | 20 | 18 | 11 | 11 | -1.47268    | 24 | 18 | 18 | 18 | -15.34484   |
| 21 | 17 | 3  | 27.59259   | 11 | 11 | 8  | 1  | 0.34384     | 20 | 18 | 12 | 12 | 3.39134     | 24 | 19 | 1  | 1  | -52.66508   |
| 21 | 17 | 4  | 95.24675   | 11 | 11 | 8  | 4  | -9.11391    | 20 | 18 | 13 | 13 | 12.74677    | 24 | 19 | 2  | 2  | 46.36034    |
| 21 | 17 | 5  | -101.97355 | 11 | 11 | 8  | 5  | -5.36965    | 20 | 18 | 14 | 14 | 3.77101     | 24 | 19 | 3  | 3  | 15.08900    |
| 21 | 17 | 6  | 80.06477   | 11 | 11 | 8  | 6  | 3.46873     | 20 | 18 | 15 | 15 | 1.92374     | 24 | 19 | 4  | 4  | -2.37923    |
| 21 | 17 | 7  | 70.25283   | 11 | 11 | 8  | 7  | -2.35327    | 20 | 18 | 16 | 16 | 6.09928     | 24 | 19 | 5  | 5  | -0.64012    |
| 21 | 17 | 8  | -3.30234   | 11 | 11 | 8  | 8  | -9.70270    | 20 | 18 | 17 | 17 | 43.58483    | 24 | 19 | 6  | 6  | -1.75356    |
| 21 | 17 | 9  | 51.53003   | 11 | 11 | 9  | 1  | 0.45289     | 20 | 18 | 18 | 17 | -0.46541    | 24 | 19 | 7  | 7  | 1.55606     |
| 21 | 18 | 1  | 79.77322   | 11 | 11 | 9  | 2  | -0.35256    | 20 | 18 | 18 | 18 | -1.38072    | 24 | 19 | 8  | 8  | -3.34399    |
| 21 | 18 | 2  | -10.80106  | 11 | 11 | 9  | 3  | 0.56557     | 20 | 19 | 1  | 1  | 59.47751    | 24 | 19 | 9  | 9  | -1.83569    |
| 21 | 18 | 3  | 28.53929   | 11 | 11 | 9  | 4  | -0.35667    | 20 | 19 | 2  | 2  | -169.83170  | 24 | 19 | 10 | 10 | -6.01021    |
| 21 | 18 | 4  | -20.09081  | 11 | 11 | 9  | 5  | -1.91003    | 20 | 19 | 3  | 3  | 55.98196    | 24 | 19 | 11 | 11 | -2.09250    |
| 21 | 18 | 5  | -103.17566 | 11 | 11 | 9  | 6  | 1.10147     | 20 | 19 | 4  | 4  | -5.50949    | 24 | 19 | 12 | 12 | -5.30293    |
| 21 | 18 | 6  | -86.38985  | 11 | 11 | 9  | 7  | 1.06389     | 20 | 19 | 5  | 5  | -8.64957    | 24 | 19 | 13 | 13 | -4.09429    |
| 21 | 18 | 7  | -13.56226  | 11 | 11 | 9  | 8  | -0.71839    | 20 | 19 | 6  | 6  | -3.07602    | 24 | 19 | 14 | 14 | 9.75336     |
| 21 | 18 | 8  | 45.04632   | 11 | 11 | 9  | 9  | -4.66578    | 20 | 19 | 7  | 7  | -3.18429    | 24 | 19 | 15 | 15 | -2.58243    |
| 21 | 18 | 9  | -29.41070  | 11 | 11 | 10 | 10 | 52.66957    | 20 | 19 | 9  | 9  | -2.29339    | 24 | 19 | 16 | 16 | -3.07868    |
| 21 | 19 | 1  | -67.83517  | 11 | 11 | 11 | 10 | -20.86787   | 20 | 19 | 10 | 10 | -11.68397   | 24 | 19 | 17 | 17 | 19.50915    |
| 21 | 19 | 2  | -40.85937  | 11 | 11 | 11 | 11 | 48.48291    | 20 | 19 | 11 | 11 | -1.51432    | 24 | 19 | 18 | 18 | 1.89591     |
| 21 | 19 | 3  | 76.60757   | 12 | 12 | 1  | 1  | -99.15579   | 20 | 19 | 12 | 12 | 5.55052     | 24 | 19 | 19 | 17 | -1.36292    |
| 21 | 19 | 4  | -36.74343  | 12 | 12 | 2  | 1  | 7.48103     | 20 | 19 | 13 | 13 | 15.46350    | 24 | 19 | 19 | 18 | -14.63374   |
| 21 | 19 | 5  | -18.61889  | 12 | 12 | 2  | 2  | -224.70744  | 20 | 19 | 14 | 14 | -9.51351    | 24 | 19 | 19 | 19 | -0.63898    |
| 21 | 19 | 6  | -11.29931  | 12 | 12 | 3  | 1  | -13.03684   | 20 | 19 | 15 | 15 | -1.56359    | 24 | 20 | 1  | 1  | 26.55023    |
| 21 | 19 | 7  | -1.83976   | 12 | 12 | 3  | 2  | -10.44733   | 20 | 19 | 16 | 16 | 3.13486     | 24 | 20 | 2  | 2  | 57.33831    |
| 21 | 19 | 8  | 26.46835   | 12 | 12 | 3  | 3  | -153.48737  | 20 | 19 | 17 | 17 | 59.80070    | 24 | 20 | 3  | 3  | -29.98921   |
| 21 | 19 | 9  | -6.58473   | 12 | 12 | 4  | 1  | -0.47071    | 20 | 19 | 18 | 18 | 1.45770     | 24 | 20 | 4  | 4  | 7.07879     |
| 21 | 20 | 1  | 14.14245   | 12 | 12 | 4  | 2  | 3.68505     | 20 | 19 | 19 | 17 | -2.08244    | 24 | 20 | 5  | 5  | 5.84040     |
| 21 | 20 | 2  | -23.66980  | 12 | 12 | 4  | 3  | 5.27059     | 20 | 19 | 19 | 18 | 10.20387    | 24 | 20 | 6  | 6  | 3.22353     |
| 21 | 20 | 3  | -126.23718 | 12 | 12 | 4  | 4  | 0.69389     | 20 | 19 | 19 | 19 | 9.13705     | 24 | 20 | 7  | 7  | 2.89400     |
| 21 | 20 | 4  | 21.05850   | 12 | 12 | 5  | 1  | -0.71317    | 20 | 20 | 1  | 1  | -37.29954   | 24 | 20 | 8  | 8  | 0.27877     |
| 21 | 20 | 5  | 43.29750   | 12 | 12 | 5  | 2  | 2.65401     | 20 | 20 | 2  | 1  | 10.16881    | 24 | 20 | 9  | 9  | 1.30636     |
| 21 | 20 | 6  | 16.23503   | 12 | 12 | 5  | 3  | 0.94411     | 2  |    |    |    |             |    |    |    |    |             |

| I J K    | FI(I,J,K)  | I J K L     | FI(I,J,K,L) | I J K L     | FI(I,J,K,L) | I J K L     | FI(I,J,K,L) |
|----------|------------|-------------|-------------|-------------|-------------|-------------|-------------|
| 21 21 8  | -78.87383  | 12 12 7 4   | 6.05269     | 20 20 5 4   | -14.08994   | 24 20 20 18 | -11.11119   |
| 21 21 9  | 17.33727   | 12 12 7 5   | -6.19814    | 20 20 5 5   | 15.90508    | 24 20 20 19 | -13.20833   |
| 22 12 11 | -18.15233  | 12 12 7 6   | 4.21570     | 20 20 6 1   | 0.71944     | 24 20 20 20 | -5.81475    |
| 22 13 10 | 12.62580   | 12 12 7 7   | 0.85345     | 20 20 6 2   | 7.24722     | 24 21 1 1   | 48.84046    |
| 22 13 11 | -36.94232  | 12 12 8 1   | 0.71447     | 20 20 6 3   | 0.49988     | 24 21 2 2   | 18.93070    |
| 22 14 10 | -16.24612  | 12 12 8 2   | 0.22111     | 20 20 6 4   | 11.46102    | 24 21 3 3   | 32.56118    |
| 22 14 11 | 25.24311   | 12 12 8 3   | -0.69350    | 20 20 6 5   | -11.65358   | 24 21 4 4   | -4.75219    |
| 22 15 10 | -15.54080  | 12 12 8 4   | 0.12113     | 20 20 6 6   | 11.77350    | 24 21 5 5   | -7.68862    |
| 22 15 11 | -8.04327   | 12 12 8 7   | 0.12320     | 20 20 7 1   | 1.08192     | 24 21 6 6   | -6.36136    |
| 22 16 10 | -35.02878  | 12 12 8 8   | -2.31016    | 20 20 7 2   | -0.93807    | 24 21 7 7   | -4.73779    |
| 22 16 11 | -9.58006   | 12 12 9 1   | 0.86199     | 20 20 7 3   | 2.67628     | 24 21 8 8   | 2.54897     |
| 22 17 1  | 9.42987    | 12 12 9 2   | 0.80260     | 20 20 7 4   | 9.54815     | 24 21 9 9   | 0.47846     |
| 22 17 2  | -2.79721   | 12 12 9 3   | -0.73565    | 20 20 7 5   | -10.80192   | 24 21 10 10 | -9.59884    |
| 22 17 3  | 24.77080   | 12 12 9 4   | 4.36792     | 20 20 7 6   | 6.88988     | 24 21 11 11 | -2.56807    |
| 22 17 4  | 1.71505    | 12 12 9 5   | -4.49987    | 20 20 7 7   | 6.87056     | 24 21 12 12 | -6.03393    |
| 22 17 5  | 8.80841    | 12 12 9 6   | 2.85993     | 20 20 8 1   | 0.59363     | 24 21 13 13 | -8.13236    |
| 22 17 6  | -17.98875  | 12 12 9 7   | 2.68671     | 20 20 8 2   | -0.86438    | 24 21 14 14 | -13.06976   |
| 22 17 7  | -18.53447  | 12 12 9 9   | 0.52785     | 20 20 8 3   | -0.66033    | 24 21 15 15 | -8.58210    |
| 22 17 8  | -2.91514   | 12 12 10 10 | 120.82244   | 20 20 8 4   | -0.77697    | 24 21 16 16 | -0.77312    |
| 22 17 9  | -7.76488   | 12 12 11 10 | -56.75823   | 20 20 8 5   | 0.34798     | 24 21 17 17 | 31.48673    |
| 22 18 1  | 10.93294   | 12 12 11 11 | 22.25402    | 20 20 8 6   | -0.47054    | 24 21 18 18 | -4.09321    |
| 22 18 2  | 43.12132   | 12 12 12 12 | 143.36972   | 20 20 8 7   | 0.16000     | 24 21 19 19 | -9.05643    |
| 22 18 3  | 8.52191    | 13 12 1 1   | 138.26753   | 20 20 8 8   | -0.92361    | 24 21 20 20 | -11.96391   |
| 22 18 4  | 32.34617   | 13 12 2 2   | -290.35353  | 20 20 9 1   | 0.68460     | 24 21 21 17 | -2.00322    |
| 22 18 5  | -83.70669  | 13 12 3 3   | 77.31658    | 20 20 9 2   | -2.08624    | 24 21 21 18 | -10.43303   |
| 22 18 6  | -100.11676 | 13 12 4 4   | -2.74675    | 20 20 9 3   | -1.57167    | 24 21 21 20 | 3.46529     |
| 22 18 7  | -97.66408  | 13 12 5 5   | -5.89209    | 20 20 9 4   | 6.56160     | 24 21 21 21 | -10.51198   |
| 22 18 8  | -2.52758   | 13 12 6 6   | -4.15883    | 20 20 9 5   | -8.64993    | 24 22 1 1   | -4.72253    |
| 22 18 9  | -23.47122  | 13 12 7 7   | -0.59258    | 20 20 9 6   | 4.88227     | 24 22 2 2   | -24.29079   |
| 22 19 1  | -10.96358  | 13 12 8 8   | -0.17383    | 20 20 9 7   | 4.93634     | 24 22 3 3   | -6.60068    |
| 22 19 2  | 69.96693   | 13 12 9 9   | -0.90262    | 20 20 9 8   | 0.26420     | 24 22 4 4   | 0.51771     |
| 22 19 3  | 4.58612    | 13 12 10 10 | -62.30393   | 20 20 9 9   | 3.13028     | 24 22 5 5   | 1.46659     |
| 22 19 4  | -133.69605 | 13 12 11 11 | -11.72152   | 20 20 10 10 | 22.71355    | 24 22 6 6   | -2.40792    |
| 22 19 5  | -69.99878  | 13 12 12 12 | 22.50076    | 20 20 11 10 | -9.99327    | 24 22 7 7   | 1.06818     |
| 22 19 6  | 21.74874   | 13 13 1 1   | -203.65856  | 20 20 11 11 | -3.45432    | 24 22 8 8   | -1.86151    |
| 22 19 7  | 14.67850   | 13 13 2 1   | 1.84642     | 20 20 12 12 | 26.13046    | 24 22 9 9   | 1.78770     |
| 22 19 8  | -22.71998  | 13 13 2 2   | -385.52309  | 20 20 13 12 | 13.57793    | 24 22 12 12 | 2.98732     |
| 22 19 9  | -29.19090  | 13 13 3 1   | 44.40766    | 20 20 13 13 | 30.56562    | 24 22 13 13 | 5.45568     |
| 22 20 1  | -1.30564   | 13 13 3 2   | -42.49630   | 20 20 14 12 | -3.31709    | 24 22 15 15 | 2.39054     |
| 22 20 2  | 83.16218   | 13 13 3 3   | -57.82690   | 20 20 14 13 | 5.07173     | 24 22 16 16 | 4.55857     |
| 22 20 3  | 20.78480   | 13 13 4 1   | -1.05220    | 20 20 14 14 | 9.12818     | 24 22 17 17 | -6.44492    |
| 22 20 4  | -2.59934   | 13 13 4 2   | 6.43274     | 20 20 15 12 | 1.56676     | 24 22 18 18 | -3.19587    |
| 22 20 5  | -10.44506  | 13 13 4 3   | 1.63876     | 20 20 15 13 | 16.73566    | 24 22 19 19 | 4.79905     |
| 22 20 6  | 15.19899   | 13 13 4 4   | -3.37396    | 20 20 15 14 | 12.20133    | 24 22 20 20 | 6.87807     |
| 22 20 7  | 10.18251   | 13 13 5 1   | -2.67299    | 20 20 15 15 | 12.81383    | 24 22 21 21 | 2.68988     |
| 22 20 8  | 2.56017    | 13 13 5 2   | 4.67247     | 20 20 16 12 | 18.28308    | 24 22 22 17 | -1.87801    |
| 22 20 9  | 16.26158   | 13 13 5 3   | 1.75430     | 20 20 16 13 | 10.04049    | 24 22 22 18 | -8.06925    |
| 22 21 1  | -3.72994   | 13 13 5 4   | -4.46865    | 20 20 16 14 | -0.95064    | 24 22 22 19 | 0.43944     |
| 22 21 2  | 17.54533   | 13 13 5 5   | -1.02718    | 20 20 16 15 | -0.20502    | 24 22 22 20 | -2.43062    |
| 22 21 3  | -9.67808   | 13 13 6 1   | 2.07927     | 20 20 16 16 | 2.36775     | 24 22 22 21 | -1.08885    |
| 22 21 4  | 26.61508   | 13 13 6 2   | 2.33218     | 20 20 17 17 | -108.88207  | 24 22 22 22 | 0.19637     |
| 22 21 5  | 78.37752   | 13 13 6 3   | -0.17787    | 20 20 18 17 | -0.89957    | 24 23 1 1   | -82.97690   |
| 22 21 6  | 54.61439   | 13 13 6 4   | 1.27385     | 20 20 18 18 | 10.69306    | 24 23 2 2   | 17.72007    |
| 22 21 7  | -7.07226   | 13 13 6 5   | -4.07557    | 20 20 19 17 | 2.59113     | 24 23 3 3   | -7.98888    |
| 22 21 8  | -71.53570  | 13 13 6 6   | -2.47075    | 20 20 19 18 | 14.00561    | 24 23 4 4   | -2.37121    |
| 22 21 9  | 24.15250   | 13 13 7 1   | -2.18153    | 20 20 19 19 | 30.48621    | 24 23 5 5   | -1.15074    |
| 22 22 1  | 14.23155   | 13 13 7 2   | 0.73160     | 20 20 20 17 | -0.72799    | 24 23 6 6   | 1.29055     |
| 22 22 2  | -45.51623  | 13 13 7 3   | 1.55455     | 20 20 20 18 | 8.70019     | 24 23 7 7   | -1.28034    |
| 22 22 3  | 6.02153    | 13 13 7 4   | 2.03037     | 20 20 20 19 | 17.04466    | 24 23 8 8   | 1.88747     |
| 22 22 4  | -106.08241 | 13 13 7 5   | -1.54291    | 20 20 20 20 | 56.96813    | 24 23 9 9   | 0.65886     |
| 22 22 5  | -87.34132  | 13 13 7 6   | 1.86370     | 21 17 1 1   | -2.45379    | 24 23 10 10 | 0.94651     |
| 22 22 6  | 80.92562   | 13 13 7 7   | -0.40966    | 21 17 2 2   | 0.12795     | 24 23 11 11 | 0.80667     |
| 22 22 7  | -115.61014 | 13 13 8 1   | 1.01379     | 21 17 3 3   | -13.22363   | 24 23 12 12 | 1.89788     |
| 22 22 8  | -172.20429 | 13 13 8 2   | -0.25608    | 21 17 4 4   | 8.06067     | 24 23 13 13 | 4.69269     |
| 22 22 9  | 9.64219    | 13 13 8 3   | -0.43374    | 21 17 5 5   | -1.42597    | 24 23 14 14 | 16.86892    |
| 23 12 10 | -12.46981  | 13 13 8 4   | 0.97203     | 21 17 6 6   | -0.69727    | 24 23 15 15 | 4.79132     |
| 23 12 11 | 0.64242    | 13 13 8 5   | 0.53992     | 21 17 7 7   | 1.65495     | 24 23 16 16 | 2.82453     |
| 23 13 10 | 12.99918   | 13 13 8 6   | -0.31221    | 21 17 8 8   | 0.29273     | 24 23 17 17 | -2.96513    |
| 23 13 11 | -4.51152   | 13 13 8 7   | -0.13959    | 21 17 9 9   | -0.43717    | 24 23 18 18 | 3.76670     |
| 23 14 10 | -13.19466  | 13 13 8 8   | -2.17734    | 21 17 10 10 | 4.34785     | 24 23 19 19 | 7.06575     |
| 23 14 11 | -27.13635  | 13 13 9 1   | 1.56224     | 21 17 11 11 | 2.80675     | 24 23 20 20 | -0.41522    |
| 23 15 10 | -6.24783   | 13 13 9 2   | 1.94116     | 21 17 12 12 | 3.25312     | 24 23 21 21 | 14.62918    |
| 23 15 11 | 18.52643   | 13 13 9 3   | -0.28662    | 21 17 13 13 | 0.26449     | 24 23 22 22 | -4.78192    |
| 23 16 10 | -9.51665   | 13 13 9 4   | 1.00277     | 21 17 14 14 | -0.34435    | 24 23 23 18 | -18.66331   |
| 23 16 11 | -11.24915  | 13 13 9 5   | -1.58605    | 21 17 15 15 | 2.61688     | 24 23 23 19 | 17.63381    |
| 23 17 1  | 2.33967    | 13 13 9 6   | 1.17456     | 21 17 16 16 | -1.83468    | 24 23 23 20 | -8.65110    |
| 23 17 3  | -2.26047   | 13 13 9 7   | 0.37591     | 21 17 17 17 | -14.64827   | 24 23 23 21 | -18.34277   |
| 23 17 4  | -2.86228   | 13 13 9 8   | 0.48582     | 21 18 1 1   | -67.64336   | 24 23 23 22 | 3.35179     |
| 23 17 5  | 10.28720   | 13 13 9 9   | -1.57132    | 21 18 2 2   | -27.64202   | 24 23 23 23 | 30.52654    |
| 23 17 6  | -10.47878  | 13 13 10 10 | 32.59813    | 21 18 3 3   | -40.54380   | 24 24 1 1   | -29.92211   |
| 23 17 7  | -8.45150   | 13 13 11 10 | -13.96830   | 21 18 4 4   | 4.59783     | 24 24 2 1   | -1.25999    |
| 23 17 8  | -5.04856   | 13 13 11 11 | 7.15372     | 21 18 5 5   | -4.49565    | 24 24 2 2   | -17.64161   |
| 23 17 9  | -10.07647  | 13 13 12 12 | 145.86252   | 21 18 6 6   | -3.03178    | 24 24 3 1   | 4.97427     |
| 23 18 1  | -99.05276  | 13 13 13 13 | 83.27400    | 21 18 7 7   | 5.61501     | 24 24 3 2   | -0.32721    |
| 23 18 2  | -28.59339  | 13 13 13 13 | 239.98154   | 21 18 8 8   | -3.08880    | 24 24 3 3   | -13.17155   |
| 23 18 3  | 19.53153   | 14 12 1 1   | -177.91395  | 21 18 9 9   | 3.16450     | 24 24 4 1   | 0.10333     |
| 23 18 4  | 46.29621   | 14 12 2 2   | -29.85048   | 21 18 10 10 | 9.77965     | 24 24 4 3   | 0.94030     |
| 23 18 5  | -49.57921  | 14 12 3 3   | 86.33196    | 21 18 11 11 | 2.67566     | 24 24 4 4   | -8.51611    |
| 23 18 6  | -64.36660  | 14 12 4 4   | -2.88523    | 21 18 12 12 | 11.59422    | 24 24 5 1   | -0.66873    |

| I J K    | FI(I,J,K)  | I J K L     | FI(I,J,K,L) | I J K L     | FI(I,J,K,L) | I J K L     | FI(I,J,K,L) |
|----------|------------|-------------|-------------|-------------|-------------|-------------|-------------|
| 23 18 7  | -46.02108  | 14 12 5 5   | -7.55543    | 21 18 13 13 | 11.93349    | 24 24 5 2   | 0.48229     |
| 23 18 8  | -10.65242  | 14 12 6 6   | -5.23041    | 21 18 14 14 | 14.29859    | 24 24 5 3   | -0.52119    |
| 23 18 9  | -3.40359   | 14 12 7 7   | -1.52004    | 21 18 15 15 | 9.99114     | 24 24 5 4   | -6.13451    |
| 23 19 1  | 141.69933  | 14 12 9 9   | -0.96788    | 21 18 16 16 | 11.59620    | 24 24 5 5   | -0.36951    |
| 23 19 2  | -30.52730  | 14 12 10 10 | -85.24993   | 21 18 17 17 | -38.84244   | 24 24 6 1   | 0.55441     |
| 23 19 3  | -45.69302  | 14 12 11 11 | -15.21338   | 21 18 18 17 | 0.41166     | 24 24 6 2   | 0.36241     |
| 23 19 4  | 43.16743   | 14 12 12 12 | -4.57175    | 21 18 18 18 | -3.48045    | 24 24 6 3   | 0.14834     |
| 23 19 5  | 18.56462   | 14 13 1 1   | 272.52788   | 21 19 1 1   | 87.63594    | 24 24 6 4   | 4.39121     |
| 23 19 6  | -14.98651  | 14 13 2 2   | -38.53429   | 21 19 2 2   | -52.00951   | 24 24 6 5   | -1.47908    |
| 23 19 7  | 30.99265   | 14 13 3 3   | -33.41788   | 21 19 3 3   | -43.49142   | 24 24 6 6   | -0.16013    |
| 23 19 8  | 34.81104   | 14 13 4 4   | 0.44799     | 21 19 4 4   | 4.80663     | 24 24 7 1   | -0.90823    |
| 23 19 9  | -5.53850   | 14 13 5 5   | 1.58675     | 21 19 5 5   | 1.99273     | 24 24 7 3   | 0.10803     |
| 23 20 1  | -71.14174  | 14 13 6 6   | 1.39337     | 21 19 6 6   | -0.13375    | 24 24 7 4   | 0.72215     |
| 23 20 2  | -62.27245  | 14 13 7 7   | 0.38493     | 21 19 7 7   | 3.22860     | 24 24 7 5   | -1.82552    |
| 23 20 3  | 21.57414   | 14 13 8 8   | -1.36736    | 21 19 8 8   | -0.58378    | 24 24 7 6   | 3.22932     |
| 23 20 4  | -18.61770  | 14 13 9 9   | 0.94688     | 21 19 9 9   | 4.05189     | 24 24 7 7   | 1.30871     |
| 23 20 5  | 30.83195   | 14 13 10 10 | 43.02431    | 21 19 10 10 | 11.97730    | 24 24 8 1   | 0.53609     |
| 23 20 6  | 16.12478   | 14 13 11 11 | 10.39429    | 21 19 11 11 | 4.77656     | 24 24 8 2   | -0.14919    |
| 23 20 7  | -6.54345   | 14 13 12 12 | -6.49481    | 21 19 12 12 | 6.38174     | 24 24 8 3   | -0.46606    |
| 23 20 8  | 6.15819    | 14 13 13 12 | 57.11514    | 21 19 13 13 | 1.03097     | 24 24 8 4   | -3.25441    |
| 23 20 9  | -1.79593   | 14 13 13 13 | -53.94995   | 21 19 14 14 | -8.57960    | 24 24 8 5   | -1.08173    |
| 23 21 1  | -134.47405 | 14 14 1 1   | -383.73052  | 21 19 15 15 | 1.53777     | 24 24 8 6   | 0.23016     |
| 23 21 2  | -28.77051  | 14 14 2 1   | -27.29072   | 21 19 16 16 | 3.32194     | 24 24 8 7   | 1.90264     |
| 23 21 3  | 21.76448   | 14 14 2 2   | -8.00411    | 21 19 17 17 | -52.60191   | 24 24 8 8   | -3.95279    |
| 23 21 4  | 30.86311   | 14 14 3 1   | 79.00440    | 21 19 18 18 | -5.15160    | 24 24 9 1   | 0.30159     |
| 23 21 5  | 31.31859   | 14 14 3 2   | 15.32071    | 21 19 19 17 | 2.15639     | 24 24 9 2   | 0.18752     |
| 23 21 6  | 58.93957   | 14 14 3 3   | -93.22098   | 21 19 19 18 | 10.81078    | 24 24 9 4   | 1.73645     |
| 23 21 7  | -5.47454   | 14 14 4 1   | 3.60388     | 21 19 19 19 | -0.44721    | 24 24 9 5   | -1.99056    |
| 23 21 8  | -16.60870  | 14 14 4 2   | 0.22276     | 21 20 1 1   | -42.37466   | 24 24 9 6   | 0.67519     |
| 23 21 9  | 13.04952   | 14 14 4 3   | 0.83717     | 21 20 2 2   | -63.36049   | 24 24 9 9   | 1.05406     |
| 23 22 1  | 13.68440   | 14 14 4 4   | -5.66103    | 21 20 3 3   | 84.16178    | 24 24 10 10 | 1.56451     |
| 23 22 2  | 25.43947   | 14 14 5 1   | -5.69164    | 21 20 4 4   | -10.32973   | 24 24 11 10 | -1.03104    |
| 23 22 3  | 7.23305    | 14 14 5 2   | -0.45103    | 21 20 5 5   | -14.94519   | 24 24 11 11 | 4.58734     |
| 23 22 4  | 147.88882  | 14 14 5 3   | 3.39399     | 21 20 6 6   | -7.28088    | 24 24 12 12 | 1.87727     |
| 23 22 5  | 67.91540   | 14 14 5 4   | -7.58214    | 21 20 7 7   | -6.50930    | 24 24 13 12 | -1.01512    |
| 23 22 6  | -39.16090  | 14 14 5 5   | 0.91439     | 21 20 8 8   | 0.95167     | 24 24 13 13 | 4.77172     |
| 23 22 7  | -36.15557  | 14 14 6 1   | 0.48024     | 21 20 9 9   | -3.83219    | 24 24 14 12 | 1.19960     |
| 23 22 8  | -0.84262   | 14 14 6 2   | 0.74931     | 21 20 10 10 | -22.96158   | 24 24 14 13 | -2.99210    |
| 23 22 9  | 13.83345   | 14 14 6 3   | -1.99081    | 21 20 11 11 | -0.30200    | 24 24 14 14 | 6.30314     |
| 23 23 1  | 249.50457  | 14 14 6 4   | 5.43999     | 21 20 12 12 | -4.27660    | 24 24 15 12 | 1.14985     |
| 23 23 2  | -1.46717   | 14 14 6 5   | -5.36085    | 21 20 13 13 | 8.03662     | 24 24 15 13 | -0.51993    |
| 23 23 3  | -63.28581  | 14 14 6 6   | 0.26034     | 21 20 14 14 | 0.28888     | 24 24 15 14 | 5.06814     |
| 23 23 4  | 6.66402    | 14 14 7 1   | -6.50571    | 21 20 15 15 | -2.84059    | 24 24 15 15 | 1.94963     |
| 23 23 5  | -8.55003   | 14 14 7 2   | -0.49937    | 21 20 16 16 | -4.37703    | 24 24 16 12 | 0.90927     |
| 23 23 6  | -7.81739   | 14 14 7 3   | 0.90131     | 21 20 17 17 | 95.80641    | 24 24 16 13 | -0.59753    |
| 23 23 7  | -40.22062  | 14 14 7 4   | 2.43266     | 21 20 18 18 | 3.75387     | 24 24 16 14 | -1.86881    |
| 23 23 8  | -60.80055  | 14 14 7 5   | -4.90353    | 21 20 19 19 | 6.58092     | 24 24 16 15 | -0.37405    |
| 23 23 9  | -38.46164  | 14 14 7 6   | 3.86382     | 21 20 20 17 | 2.20295     | 24 24 16 16 | -3.01146    |
| 24 12 10 | -4.34878   | 14 14 7 7   | 1.02212     | 21 20 20 18 | 14.51881    | 24 24 17 17 | -11.73679   |
| 24 12 11 | 5.59644    | 14 14 8 1   | -1.36203    | 21 20 20 19 | 14.60601    | 24 24 18 17 | 1.00675     |
| 24 13 10 | 8.07969    | 14 14 8 3   | -0.54303    | 21 20 20 20 | -6.83847    | 24 24 18 18 | 1.26359     |
| 24 13 11 | 5.03521    | 14 14 8 4   | -1.16773    | 21 21 1 1   | -84.56813   | 24 24 19 17 | 0.54398     |
| 24 14 11 | 7.26275    | 14 14 8 7   | 0.20133     | 21 21 2 1   | -2.74489    | 24 24 19 18 | -3.29288    |
| 24 15 10 | -4.45629   | 14 14 8 8   | -3.43130    | 21 21 2 2   | -22.75616   | 24 24 19 19 | 4.62292     |
| 24 15 11 | 7.16152    | 14 14 9 1   | 1.49863     | 21 21 3 1   | -0.40484    | 24 24 20 17 | -0.80791    |
| 24 16 10 | -5.61766   | 14 14 9 2   | 0.43571     | 21 21 3 2   | 8.43700     | 24 24 20 18 | 1.92127     |
| 24 16 11 | 12.90649   | 14 14 9 3   | -0.90004    | 21 21 3 3   | -84.96656   | 24 24 20 20 | 7.79504     |
| 24 17 1  | 0.79809    | 14 14 9 4   | 1.77371     | 21 21 4 1   | 0.77291     | 24 24 21 17 | 0.46544     |
| 24 17 2  | -0.27194   | 14 14 9 5   | -3.41589    | 21 21 4 2   | -0.44577    | 24 24 21 18 | 7.40501     |
| 24 17 3  | 4.45913    | 14 14 9 6   | 0.98239     | 21 21 4 3   | 6.25461     | 24 24 21 19 | -0.88262    |
| 24 17 4  | -44.76891  | 14 14 9 7   | 1.98129     | 21 21 4 4   | 10.97768    | 24 24 21 20 | 0.43415     |
| 24 17 5  | 51.93038   | 14 14 9 8   | -1.01298    | 21 21 5 1   | -0.82467    | 24 24 21 21 | 4.92503     |
| 24 17 6  | -37.83606  | 14 14 9 9   | -1.55703    | 21 21 5 3   | -0.88634    | 24 24 22 17 | 0.38510     |
| 24 17 7  | -24.96214  | 14 14 10 10 | 63.62373    | 21 21 5 4   | -5.59262    | 24 24 22 18 | -0.59382    |
| 24 17 8  | -1.02747   | 14 14 11 10 | -24.73655   | 21 21 5 5   | 30.45509    | 24 24 22 19 | -5.50623    |
| 24 17 9  | -20.17387  | 14 14 11 11 | 17.00969    | 21 21 6 1   | 0.75110     | 24 24 22 20 | -1.17728    |
| 24 18 1  | -56.06747  | 14 14 12 12 | 76.58116    | 21 21 6 2   | 0.28110     | 24 24 22 21 | -3.99972    |
| 24 18 2  | 31.62846   | 14 14 13 12 | -84.26186   | 21 21 6 3   | 0.95966     | 24 24 22 22 | -9.62878    |
| 24 18 3  | -11.89400  | 14 14 13 13 | 114.69865   | 21 21 6 4   | 13.28515    | 24 24 23 18 | -2.90254    |
| 24 18 4  | -3.42725   | 14 14 14 12 | 78.87296    | 21 21 6 5   | 1.54043     | 24 24 23 19 | 10.73083    |
| 24 18 5  | 11.03008   | 14 14 14 13 | -137.70371  | 21 21 6 6   | 20.93071    | 24 24 23 20 | -2.11762    |
| 24 18 6  | 11.98642   | 14 14 14 14 | 216.96655   | 21 21 7 1   | -1.09382    | 24 24 23 21 | -8.72438    |
| 24 18 7  | 19.96433   | 15 12 1 1   | -94.15656   | 21 21 7 2   | -1.23207    | 24 24 23 22 | 3.00059     |
| 24 18 8  | 22.50406   | 15 12 2 2   | -156.18831  | 21 21 7 3   | 2.84216     | 24 24 23 23 | 11.48252    |
| 24 18 9  | -18.74006  | 15 12 3 3   | 121.97354   | 21 21 7 4   | 8.49279     | 24 24 24 17 | -0.21361    |
| 24 19 1  | 54.07641   | 15 12 4 4   | -8.36369    | 21 21 7 5   | -9.62481    | 24 24 24 18 | -4.91847    |
| 24 19 2  | 62.76480   | 15 12 5 5   | -7.23215    | 21 21 7 6   | 9.67684     | 24 24 24 20 | -1.32280    |
| 24 19 3  | -33.16179  | 15 12 6 6   | -5.43967    | 21 21 7 7   | 6.70365     | 24 24 24 21 | -4.65211    |
| 24 19 4  | 11.47054   | 15 12 7 7   | -4.18166    | 21 21 8 1   | 0.24314     | 24 24 24 23 | 5.79726     |
| 24 19 5  | -25.53903  | 15 12 9 9   | -1.36489    | 21 21 8 2   | 2.42088     | 24 24 24 24 | 7.64070     |

Table S35: The quartic potential energy surface of Pyrimidine-d4. The calculation was done by using B3LYP/6-311++G(2d,2p) method. The force constants (F) are in  $\text{cm}^{-1}$  units.

| I J   | F(I,J)     | I J K   | F(I,J,K)   | I J K L     | F(I,J,K,L) | I J K L     | F(I,J,K,L) |
|-------|------------|---------|------------|-------------|------------|-------------|------------|
| 1 1   | 2373.20410 | 24 18 5 | 12.74289   | 15 12 5 5   | 3.92871    | 21 21 8 4   | -5.48338   |
| 2 2   | 2347.31359 | 24 18 6 | -2.00956   | 15 12 6 6   | 0.23449    | 21 21 8 5   | 6.30456    |
| 3 3   | 2328.87749 | 24 18 7 | 21.51349   | 15 12 7 7   | 0.61147    | 21 21 8 6   | -2.99552   |
| 4 4   | 1571.23541 | 24 18 8 | -11.12271  | 15 12 8 8   | 11.09711   | 21 21 8 7   | 0.59168    |
| 5 5   | 1305.52324 | 24 18 9 | -16.80931  | 15 12 9 9   | 2.06939    | 21 21 8 8   | 13.58167   |
| 6 6   | 1066.99001 | 24 19 1 | -35.02691  | 15 12 10 10 | 52.79998   | 21 21 9 1   | 0.39641    |
| 7 7   | 993.65962  | 24 19 2 | -36.97245  | 15 12 11 11 | 20.82111   | 21 21 9 2   | 0.59466    |
| 8 8   | 884.35864  | 24 19 3 | 12.43470   | 15 12 12 12 | 9.80024    | 21 21 9 4   | 2.17222    |
| 9 9   | 674.14544  | 24 19 4 | -4.89780   | 15 13 1 1   | 13.05866   | 21 21 9 5   | -4.05172   |
| 10 10 | 813.87986  | 24 19 5 | 31.73642   | 15 13 2 2   | 118.90871  | 21 21 9 6   | 0.99028    |
| 11 11 | 376.16410  | 24 19 6 | -9.98319   | 15 13 3 3   | -20.69105  | 21 21 9 8   | -6.69168   |
| 12 12 | 868.24817  | 24 19 7 | -4.31979   | 15 13 4 4   | 0.71820    | 21 21 9 9   | 2.93362    |
| 13 13 | 850.41351  | 24 19 8 | -14.80370  | 15 13 5 5   | 0.40773    | 21 21 10 10 | 8.20536    |
| 14 14 | 674.94114  | 24 19 9 | 12.92079   | 15 13 6 6   | 0.17504    | 21 21 11 10 | -6.01062   |
| 15 15 | 562.64216  | 24 20 1 | -25.18237  | 15 13 8 8   | 5.04683    | 21 21 11 11 | -2.66934   |
| 16 16 | 302.94635  | 24 20 2 | -11.98245  | 15 13 9 9   | 1.33378    | 21 21 12 12 | 3.68886    |
| 17 17 | 2336.64354 | 24 20 3 | -16.47291  | 15 13 10 10 | 30.60689   | 21 21 13 12 | 0.21536    |
| 18 18 | 1570.24879 | 24 20 4 | -22.73130  | 15 13 11 11 | 9.00155    | 21 21 13 13 | 11.72573   |
| 19 19 | 1358.09972 | 24 20 5 | -4.85390   | 15 13 12 12 | 7.24837    | 21 21 14 12 | -2.66950   |
| 20 20 | 1215.81696 | 24 20 6 | -6.00831   | 15 13 13 12 | 13.99780   | 21 21 14 13 | 5.84027    |
| 21 21 | 1054.06349 | 24 20 7 | -2.29910   | 15 13 13 13 | -53.30704  | 21 21 14 14 | 4.88360    |
| 22 22 | 936.46445  | 24 20 9 | -3.18976   | 15 14 1 1   | -136.10522 | 21 21 15 12 | 6.05784    |
| 23 23 | 832.92924  | 24 21 1 | -19.79536  | 15 14 2 2   | 58.24597   | 21 21 15 13 | -5.75253   |
| 24 24 | 618.42285  | 24 21 2 | 26.08878   | 15 14 3 3   | -12.19605  | 21 21 15 14 | -0.46562   |
|       |            | 24 21 3 | 67.07729   | 15 14 4 4   | 0.68186    | 21 21 15 15 | 12.44434   |
| I J K | F(I,J,K)   | 24 21 4 | -8.28893   | 15 14 5 5   | 1.18913    | 21 21 16 12 | -2.36698   |
|       |            | 24 21 5 | -5.54321   | 15 14 6 6   | 1.42017    | 21 21 16 13 | -10.53206  |
| 1 1 1 | -974.03713 | 24 21 6 | 0.70871    | 15 14 8 8   | 1.72275    | 21 21 16 14 | -1.95639   |
| 2 1 1 | -178.80410 | 24 21 7 | 0.67670    | 15 14 10 10 | 4.93955    | 21 21 16 15 | 0.88556    |
| 2 2 1 | -187.25124 | 24 21 8 | 11.57807   | 15 14 12 12 | 21.77623   | 21 21 16 16 | 2.07753    |
| 2 2 2 | 1008.25542 | 24 21 9 | 1.77272    | 15 14 13 13 | -29.03436  | 21 21 17 17 | -51.50295  |
| 3 1 1 | 240.16055  | 24 22 1 | -22.09689  | 15 14 14 12 | -41.78026  | 21 21 18 17 | 2.15836    |
| 3 2 1 | 124.36523  | 24 22 2 | 50.84268   | 15 14 14 13 | -29.18794  | 21 21 18 18 | 1.36396    |
| 3 2 2 | 325.47161  | 24 22 3 | -22.43508  | 15 14 14 14 | 83.78850   | 21 21 19 17 | 1.08365    |
| 3 3 1 | -400.45458 | 24 22 4 | 2.55309    | 15 15 1 1   | -111.00418 | 21 21 19 18 | -1.61218   |
| 3 3 2 | 283.12878  | 24 22 5 | 2.19350    | 15 15 2 1   | 0.48109    | 21 21 19 19 | 3.88410    |
| 3 3 3 | -501.64515 | 24 22 6 | 7.49619    | 15 15 2 2   | -99.29810  | 21 21 20 17 | 2.17090    |
| 4 1 1 | 73.57214   | 24 22 7 | -5.53516   | 15 15 3 1   | -5.70030   | 21 21 20 18 | 0.19671    |
| 4 2 1 | 11.13716   | 24 22 8 | -15.36250  | 15 15 3 2   | 7.96220    | 21 21 20 19 | 1.30155    |
| 4 2 2 | 22.96260   | 24 22 9 | 4.67311    | 15 15 3 3   | -121.63267 | 21 21 20 20 | 0.63390    |
| 4 3 1 | -14.40765  | 24 23 1 | 97.19501   | 15 15 4 1   | 6.28766    | 21 21 21 17 | 0.33817    |
| 4 3 3 | 20.28187   | 24 23 2 | 37.22372   | 15 15 4 2   | -0.37765   | 21 21 21 18 | 2.46359    |
| 4 4 1 | 16.45579   | 24 23 3 | -18.31534  | 15 15 4 3   | -0.87310   | 21 21 21 19 | -2.72813   |
| 4 4 2 | -15.25851  | 24 23 4 | -4.07281   | 15 15 4 4   | -1.53292   | 21 21 21 20 | -9.08372   |
| 4 4 3 | 52.02130   | 24 23 5 | 19.84025   | 15 15 5 1   | 7.02320    | 21 21 21 21 | 22.65987   |
| 4 4 4 | -172.33460 | 24 23 6 | -6.93291   | 15 15 5 2   | -4.21017   | 22 17 1 1   | -2.80045   |
| 5 1 1 | -77.07092  | 24 23 7 | 9.10318    | 15 15 5 3   | -3.66421   | 22 17 2 2   | -0.36583   |
| 5 2 1 | -16.81623  | 24 23 9 | 1.32241    | 15 15 5 4   | -2.19703   | 22 17 3 3   | -7.60316   |
| 5 2 2 | 49.29613   | 24 24 1 | 58.14202   | 15 15 5 5   | -1.24542   | 22 17 4 4   | 2.23936    |
| 5 3 1 | 3.67781    | 24 24 2 | -14.55348  | 15 15 6 1   | 5.42172    | 22 17 5 5   | 0.78660    |
| 5 3 2 | 33.66250   | 24 24 4 | 18.00123   | 15 15 6 2   | -6.33221   | 22 17 6 6   | 0.08437    |
| 5 3 3 | -32.42946  | 24 24 6 | 2.31238    | 15 15 6 3   | 4.47072    | 22 17 7 7   | 0.43319    |
| 5 4 1 | -19.04570  | 24 24 7 | 2.96881    | 15 15 6 5   | -0.70790   | 22 17 8 8   | 0.18227    |
| 5 4 2 | 9.95611    | 24 24 8 | 11.28905   | 15 15 6 6   | -4.78479   | 22 17 9 9   | 0.36261    |
| 5 4 3 | -33.74779  | 24 24 9 | -2.32103   | 15 15 7 1   | -4.80714   | 22 17 10 10 | 1.81476    |
| 5 4 4 | -43.59195  |         |            | 15 15 7 2   | 0.68261    | 22 17 11 11 | 1.74293    |
| 5 5 1 | 18.29611   | I J K L | F(I,J,K,L) | 15 15 7 6   | -1.33159   | 22 17 12 12 | 0.93424    |
| 5 5 2 | -12.92776  | 1 1 1 1 | 412.38193  | 15 15 7 7   | -2.38770   | 22 17 13 13 | 0.26486    |
| 5 5 3 | 25.30860   | 2 1 1 1 | 93.08885   | 15 15 8 1   | 2.59236    | 22 17 14 14 | -0.70524   |
| 5 5 4 | 76.93133   | 2 2 1 1 | 32.15508   | 15 15 8 2   | 0.20013    | 22 17 15 15 | 2.08233    |
| 5 5 5 | 47.71333   | 2 2 2 1 | -44.97714  | 15 15 8 3   | 3.27736    | 22 17 17 17 | -11.40406  |
| 6 1 1 | 27.38755   | 2 2 2 2 | 451.00248  | 15 15 8 4   | -4.70714   | 22 18 1 1   | -3.00203   |
| 6 2 1 | -10.10121  | 3 1 1 1 | -136.79856 | 15 15 8 5   | 6.54175    | 22 18 2 2   | -28.67610  |
| 6 2 2 | 68.71624   | 3 2 1 1 | -44.59406  | 15 15 8 6   | -3.12681   | 22 18 3 3   | -14.77723  |
| 6 3 1 | 14.49501   | 3 2 2 1 | -18.78374  | 15 15 8 7   | 0.31908    | 22 18 4 4   | -3.37065   |
| 6 3 2 | 6.07579    | 3 2 2 2 | 153.65461  | 15 15 8 8   | 11.71312   | 22 18 5 5   | -4.95450   |
| 6 3 3 | 58.25582   | 3 3 1 1 | 89.60026   | 15 15 9 1   | -0.61629   | 22 18 6 6   | -1.10600   |
| 6 4 1 | 14.32911   | 3 3 2 1 | -16.49426  | 15 15 9 2   | 1.31332    | 22 18 7 7   | -0.79412   |
| 6 4 2 | 4.40499    | 3 3 2 2 | 78.33080   | 15 15 9 3   | 1.79739    | 22 18 8 8   | 3.68192    |
| 6 4 3 | 5.05724    | 3 3 3 1 | 53.54418   | 15 15 9 4   | 4.31052    | 22 18 9 9   | 2.26677    |
| 6 4 4 | 93.33962   | 3 3 3 2 | -38.83102  | 15 15 9 5   | -3.51383   | 22 18 10 10 | 2.63201    |
| 6 5 1 | -10.98530  | 4 1 1 1 | 192.14355  | 15 15 9 6   | 0.82208    | 22 18 11 11 | 1.29577    |
| 6 5 2 | 3.39212    | 4 2 1 1 | -31.48964  | 15 15 9 8   | -8.74018   | 22 18 12 12 | 2.29233    |
| 6 5 3 | -1.24568   | 4 2 2 1 | -7.06106   | 15 15 9 9   | 2.32148    | 22 18 13 13 | 6.27942    |
| 6 5 4 | -10.86827  | 4 2 2 2 | -3.21838   | 15 15 10 10 | 85.45121   | 22 18 14 14 | 1.38862    |
| 6 5 5 | 48.06731   | 4 2 2 3 | 11.76592   | 15 15 11 10 | -49.50325  | 22 18 15 15 | 3.57523    |
| 6 6 1 | 1.15150    | 4 3 1 1 | 10.77348   | 15 15 11 11 | 35.29114   | 22 18 16 16 | 7.41208    |
| 6 6 2 | 3.13843    | 4 3 2 1 | 5.00481    | 15 15 12 12 | 45.48652   | 22 18 17 17 | -14.32995  |
| 6 6 3 | 0.96261    | 4 3 2 2 | -5.60353   | 15 15 12 13 | 15.70224   | 22 18 18 17 | 0.82052    |
| 6 6 4 | -5.55016   | 4 3 3 1 | 0.76731    | 15 15 13 13 | 52.93292   | 22 18 18 18 | -6.79901   |
| 6 6 6 | 43.37251   | 4 3 3 2 | 1.43992    | 15 15 14 12 | -32.99408  | 22 19 1 1   | 2.25681    |
| 7 1 1 | -58.54608  | 4 3 3 3 | -1.41172   | 15 15 14 13 | 15.21399   | 22 19 2 2   | 42.47719   |
| 7 2 1 | -8.12309   | 4 4 1 1 | 1.76582    | 15 15 14 14 | 76.28385   | 22 19 3 3   | 19.70687   |
| 7 2 2 | -17.91799  | 4 4 2 1 | -1.97593   | 15 15 15 12 | 33.47450   | 22 19 4 4   | 9.50482    |
| 7 3 1 | 11.31480   | 4 4 2 2 | -4.96249   | 15 15 15 13 | -8.90958   | 22 19 5 5   | 1.11589    |
| 7 3 2 | 3.41092    | 4 4 3 1 |            | 15 15 15 14 | 31.82956   | 22 19 6 6   | 0.30858    |

| I | J | K | Fl(I,J,K)  | I | J | K | L | Fl(I,J,,K,L) | I  | J  | K  | L  | Fl(I,J,K,L) | I  | J  | K  | L  | Fl(I,J,K,L) |
|---|---|---|------------|---|---|---|---|--------------|----|----|----|----|-------------|----|----|----|----|-------------|
| 7 | 3 | 3 | -20.16025  | 4 | 4 | 3 | 2 | 3.09101      | 15 | 15 | 15 | 15 | 124.59309   | 22 | 19 | 7  | 7  | 2.14490     |
| 7 | 4 | 1 | -3.00705   | 4 | 4 | 3 | 3 | -11.81578    | 16 | 12 | 1  | 1  | 47.75628    | 22 | 19 | 8  | 8  | -4.60357    |
| 7 | 4 | 2 | 5.81843    | 4 | 4 | 4 | 1 | -2.20517     | 16 | 12 | 2  | 2  | -10.81822   | 22 | 19 | 9  | 9  | -1.23046    |
| 7 | 4 | 3 | 3.95737    | 4 | 4 | 4 | 2 | 2.00805      | 16 | 12 | 3  | 3  | 40.67881    | 22 | 19 | 10 | 10 | -3.97577    |
| 7 | 4 | 4 | -146.42917 | 4 | 4 | 4 | 3 | -1.97709     | 16 | 12 | 4  | 4  | -4.34742    | 22 | 19 | 11 | 11 | -6.58448    |
| 7 | 5 | 1 | 5.86922    | 4 | 4 | 4 | 4 | 37.52831     | 16 | 12 | 5  | 5  | -2.27435    | 22 | 19 | 12 | 12 | -2.68026    |
| 7 | 5 | 2 | 9.65839    | 5 | 1 | 1 | 1 | 30.48262     | 16 | 12 | 7  | 7  | -0.77919    | 22 | 19 | 13 | 13 | -6.81658    |
| 7 | 5 | 3 | 12.94970   | 5 | 2 | 1 | 1 | 6.66737      | 16 | 12 | 8  | 8  | -8.60634    | 22 | 19 | 14 | 14 | -2.86128    |
| 7 | 5 | 4 | -31.99542  | 5 | 2 | 2 | 1 | -0.89884     | 16 | 12 | 10 | 10 | -30.58716   | 22 | 19 | 15 | 15 | -4.50408    |
| 7 | 5 | 5 | -97.07535  | 5 | 2 | 2 | 2 | 29.12604     | 16 | 12 | 11 | 11 | -14.12530   | 22 | 19 | 16 | 16 | -2.40157    |
| 7 | 6 | 1 | -9.06663   | 5 | 3 | 1 | 1 | -8.19447     | 16 | 12 | 12 | 12 | -13.25255   | 22 | 19 | 17 | 17 | 18.34236    |
| 7 | 6 | 2 | 5.19496    | 5 | 3 | 2 | 2 | 10.77789     | 16 | 13 | 1  | 1  | 17.14368    | 22 | 19 | 18 | 18 | -1.34022    |
| 7 | 6 | 3 | -3.14888   | 5 | 3 | 3 | 1 | 9.06180      | 16 | 13 | 2  | 2  | 116.80148   | 22 | 19 | 19 | 19 | -0.50328    |
| 7 | 6 | 4 | 9.74024    | 5 | 3 | 3 | 2 | 1.75386      | 16 | 13 | 3  | 3  | 38.39637    | 22 | 19 | 19 | 18 | -1.40868    |
| 7 | 6 | 5 | -5.21772   | 5 | 3 | 3 | 3 | 10.04255     | 16 | 13 | 4  | 4  | -2.57966    | 22 | 19 | 19 | 19 | 3.38978     |
| 7 | 6 | 6 | -24.99419  | 5 | 4 | 1 | 1 | 0.80426      | 16 | 13 | 5  | 5  | -7.32851    | 22 | 20 | 1  | 1  | -2.79652    |
| 7 | 7 | 1 | 6.96965    | 5 | 4 | 2 | 2 | 0.56234      | 16 | 13 | 7  | 7  | -2.49046    | 22 | 20 | 2  | 2  | 21.57281    |
| 7 | 7 | 2 | -8.78046   | 5 | 4 | 3 | 3 | 12.36898     | 16 | 13 | 8  | 8  | -3.49701    | 22 | 20 | 3  | 3  | -11.96142   |
| 7 | 7 | 3 | 4.91419    | 5 | 4 | 4 | 1 | 0.30099      | 16 | 13 | 9  | 9  | -0.57098    | 22 | 20 | 4  | 4  | -10.39325   |
| 7 | 7 | 4 | -5.81319   | 5 | 4 | 4 | 2 | 1.57316      | 16 | 13 | 10 | 10 | -18.49101   | 22 | 20 | 5  | 5  | 7.96655     |
| 7 | 7 | 5 | 8.54744    | 5 | 4 | 4 | 3 | -1.28185     | 16 | 13 | 11 | 11 | -5.11545    | 22 | 20 | 6  | 6  | 0.15798     |
| 7 | 7 | 6 | 33.36012   | 5 | 4 | 4 | 4 | 4.73087      | 16 | 13 | 12 | 12 | -6.94625    | 22 | 20 | 7  | 7  | -1.06505    |
| 7 | 7 | 7 | -83.38854  | 5 | 5 | 1 | 1 | -1.12540     | 16 | 13 | 13 | 12 | 4.73671     | 22 | 20 | 8  | 8  | 6.95100     |
| 8 | 1 | 1 | 20.86223   | 5 | 5 | 2 | 1 | 2.36758      | 16 | 13 | 13 | 13 | -57.36852   | 22 | 20 | 9  | 9  | 0.85216     |
| 8 | 2 | 1 | 2.79931    | 5 | 5 | 2 | 2 | -2.03268     | 16 | 14 | 1  | 1  | -85.95324   | 22 | 20 | 10 | 10 | 6.65213     |
| 8 | 2 | 2 | -7.56158   | 5 | 5 | 3 | 1 | -6.77409     | 16 | 14 | 2  | 2  | 57.30213    | 22 | 20 | 11 | 11 | 6.87403     |
| 8 | 3 | 1 | 1.48205    | 5 | 5 | 3 | 2 | 4.56462      | 16 | 14 | 3  | 3  | -2.81721    | 22 | 20 | 12 | 12 | 3.25535     |
| 8 | 3 | 2 | -8.23443   | 5 | 5 | 3 | 3 | -15.65668    | 16 | 14 | 4  | 4  | -0.37236    | 22 | 20 | 13 | 13 | -6.99015    |
| 8 | 3 | 3 | 10.73316   | 5 | 5 | 4 | 1 | 1.05473      | 16 | 14 | 5  | 5  | 3.20151     | 22 | 20 | 14 | 14 | 0.21796     |
| 8 | 4 | 1 | -4.41616   | 5 | 5 | 4 | 3 | 3.68783      | 16 | 14 | 6  | 6  | 1.20673     | 22 | 20 | 15 | 15 | 1.19779     |
| 8 | 4 | 2 | 12.53757   | 5 | 5 | 4 | 4 | -2.11016     | 16 | 14 | 7  | 7  | 0.84893     | 22 | 20 | 16 | 16 | -4.07851    |
| 8 | 4 | 3 | -34.85019  | 5 | 5 | 5 | 1 | -1.22858     | 16 | 14 | 10 | 10 | -3.29687    | 22 | 20 | 17 | 17 | -19.13778   |
| 8 | 4 | 4 | 13.30519   | 5 | 5 | 5 | 2 | 1.54510      | 16 | 14 | 12 | 12 | 12.16848    | 22 | 20 | 18 | 18 | 2.68834     |
| 8 | 5 | 1 | 8.93089    | 5 | 5 | 5 | 3 | -1.39947     | 16 | 14 | 13 | 13 | -33.82586   | 22 | 20 | 19 | 19 | -6.79994    |
| 8 | 5 | 2 | -14.97205  | 5 | 5 | 5 | 4 | -2.33157     | 16 | 14 | 14 | 12 | -27.47463   | 22 | 20 | 20 | 17 | 1.53635     |
| 8 | 5 | 3 | 46.36683   | 5 | 5 | 5 | 5 | 8.46589      | 16 | 14 | 14 | 13 | -24.38424   | 22 | 20 | 20 | 18 | -11.25207   |
| 8 | 5 | 4 | -56.05355  | 6 | 1 | 1 | 1 | -5.12140     | 16 | 14 | 14 | 14 | 52.39743    | 22 | 20 | 20 | 19 | 9.64882     |
| 8 | 5 | 5 | 3.13591    | 6 | 2 | 1 | 1 | 0.50281      | 16 | 15 | 1  | 1  | -47.55537   | 22 | 20 | 20 | 20 | -5.62276    |
| 8 | 6 | 1 | -1.63870   | 6 | 2 | 2 | 1 | -4.27699     | 16 | 15 | 2  | 2  | -77.09098   | 22 | 21 | 1  | 1  | 5.59061     |
| 8 | 6 | 2 | 5.67529    | 6 | 2 | 2 | 2 | 31.44795     | 16 | 15 | 3  | 3  | 36.94379    | 22 | 21 | 2  | 2  | -79.84456   |
| 8 | 6 | 3 | -20.27332  | 6 | 3 | 1 | 1 | -1.67470     | 16 | 15 | 4  | 4  | -1.43918    | 22 | 21 | 3  | 3  | 27.44542    |
| 8 | 6 | 4 | 26.45198   | 6 | 3 | 2 | 2 | 9.66493      | 16 | 15 | 5  | 5  | -3.87399    | 22 | 21 | 4  | 4  | -2.67888    |
| 8 | 6 | 5 | -8.60423   | 6 | 3 | 3 | 1 | -8.22901     | 16 | 15 | 6  | 6  | -0.67671    | 22 | 21 | 5  | 5  | -1.56660    |
| 8 | 6 | 6 | -2.25308   | 6 | 3 | 3 | 2 | 8.72301      | 16 | 15 | 8  | 8  | -3.88252    | 22 | 21 | 6  | 6  | -0.17025    |
| 8 | 7 | 1 | -6.27147   | 6 | 3 | 3 | 3 | -14.17200    | 16 | 15 | 9  | 9  | -0.58659    | 22 | 21 | 7  | 7  | -0.23684    |
| 8 | 7 | 2 | -2.75848   | 6 | 4 | 1 | 1 | 0.37984      | 16 | 15 | 10 | 10 | -50.69672   | 22 | 21 | 8  | 8  | -12.61735   |
| 8 | 7 | 4 | -17.43209  | 6 | 4 | 2 | 2 | -0.68183     | 16 | 15 | 11 | 11 | -17.82620   | 22 | 21 | 9  | 9  | -3.68220    |
| 8 | 7 | 5 | 27.69592   | 6 | 4 | 3 | 3 | -4.60578     | 16 | 15 | 12 | 12 | -8.42401    | 22 | 21 | 10 | 10 | -8.40965    |
| 8 | 7 | 6 | -2.54994   | 6 | 4 | 4 | 1 | 1.62413      | 16 | 15 | 13 | 13 | 36.84183    | 22 | 21 | 12 | 12 | -2.46912    |
| 8 | 7 | 7 | 5.47454    | 6 | 4 | 4 | 2 | 0.91566      | 16 | 15 | 14 | 14 | 52.16516    | 22 | 21 | 13 | 13 | 9.81294     |
| 8 | 8 | 1 | 55.89882   | 6 | 4 | 4 | 3 | 2.14734      | 16 | 15 | 15 | 12 | -36.62213   | 22 | 21 | 14 | 14 | 1.92783     |
| 8 | 8 | 2 | -32.76312  | 6 | 4 | 4 | 4 | -11.66169    | 16 | 15 | 15 | 13 | -46.54161   | 22 | 21 | 15 | 15 | -2.32147    |
| 8 | 8 | 3 | 110.21877  | 6 | 5 | 1 | 1 | -0.09626     | 16 | 15 | 15 | 14 | 9.30514     | 22 | 21 | 17 | 17 | 48.99794    |
| 8 | 8 | 4 | 17.08924   | 6 | 5 | 2 | 2 | 1.04659      | 16 | 15 | 15 | 15 | -4.49017    | 22 | 21 | 18 | 18 | 1.35333     |
| 8 | 8 | 5 | -20.24921  | 6 | 5 | 3 | 3 | 5.60032      | 16 | 16 | 1  | 1  | -44.53831   | 22 | 21 | 19 | 19 | 1.59530     |
| 8 | 8 | 6 | 25.61859   | 6 | 5 | 4 | 4 | -2.52402     | 16 | 16 | 2  | 1  | 3.62479     | 22 | 21 | 20 | 20 | -0.74293    |
| 8 | 8 | 7 | -10.33259  | 6 | 5 | 5 | 1 | 1.58761      | 16 | 16 | 2  | 2  | -78.76971   | 22 | 21 | 21 | 17 | 0.29145     |
| 8 | 8 | 8 | 33.67824   | 6 | 5 | 5 | 2 | 1.77004      | 16 | 16 | 3  | 1  | 2.36602     | 22 | 21 | 21 | 18 | 6.83657     |
| 9 | 1 | 1 | -10.85710  | 6 | 5 | 5 | 3 | 1.32551      | 16 | 16 | 3  | 2  | -13.92142   | 22 | 21 | 21 | 19 | -8.07924    |
| 9 | 2 | 1 | -0.94020   | 6 | 5 | 5 | 4 | 2.76931      | 16 | 16 | 3  | 3  | -45.24354   | 22 | 21 | 21 | 20 | -1.25361    |
| 9 | 2 | 2 | -19.87901  | 6 | 5 | 5 | 5 | -4.73380     | 16 | 16 | 4  | 2  | -0.55062    | 22 | 21 | 21 | 21 | 5.63867     |
| 9 | 3 | 1 | 9.09272    | 6 | 6 | 1 | 1 | -0.40152     | 16 | 16 | 4  | 3  | -3.45690    | 22 | 22 | 1  | 1  | -7.74037    |
| 9 | 3 | 2 | -8.18682   | 6 | 6 | 2 | 1 | 0.16404      | 16 | 16 | 4  | 4  | -11.03103   | 22 | 22 | 2  | 1  | 12.93933    |
| 9 | 3 | 3 | 2.19049    | 6 | 6 | 2 | 2 | 0.12980      | 16 | 16 | 5  | 1  | 0.67195     | 22 | 22 | 2  | 2  | -79.99778   |
| 9 | 4 | 1 | 18.78866   | 6 | 6 | 3 | 1 | -0.78995     | 16 | 16 | 5  | 2  | -3.75921    | 22 | 22 | 3  | 1  | -12.41819   |
| 9 | 4 | 2 | -12.21512  | 6 | 6 | 3 | 2 | 0.64462      | 16 | 16 | 5  | 3  | 0.23975     | 22 | 22 | 3  | 2  | -16.53623   |
| 9 | 4 | 3 | 18.72027   | 6 | 6 | 3 | 3 | -1.85237     | 16 | 16 | 5  | 4  | 1.10283     | 22 | 22 | 3  | 3  | -46.11543   |
| 9 | 4 | 4 | -4.36460   | 6 | 6 | 4 | 1 | 1.01022      | 16 | 16 | 5  | 5  | -15.71572   | 22 | 22 | 4  | 1  | 0.90627     |
| 9 | 5 | 1 | -16.56811  | 6 | 6 | 4 | 2 | 0.98262      | 16 | 16 | 6  | 2  | -5.23925    | 22 | 22 | 4  | 2  | -0.53859    |
| 9 | 5 | 2 | -4.95062   | 6 | 6 | 4 | 3 | 1.82127      | 16 | 16 | 6  | 4  | -4.11756    | 22 | 22 | 4  | 3  | 1.90543     |
| 9 | 5 | 3 | -26.46714  | 6 | 6 | 4 | 4 | -1.79573     | 16 | 16 | 6  | 5  | -2.18504    | 22 | 22 | 4  | 4  | 5.71989     |
| 9 | 5 | 4 | 16.70331   | 6 | 6 | 5 | 1 | -0.40787     | 16 | 16 | 6  | 6  | -7.12155    | 22 | 22 | 5  | 1  | -0.25653    |
| 9 | 5 | 5 | 41.88242   | 6 | 6 | 5 | 2 | 1.45869      | 16 | 16 | 7  | 1  | -1.32330    | 22 | 22 | 5  | 2  | -0.97816    |
| 9 | 6 | 1 | 1.02653    | 6 | 6 | 5 | 3 | 1.03473      | 16 | 16 | 7  | 4  | 7.48164     | 22 | 22 | 5  | 3  | -1.40844    |
| 9 | 6 | 2 | -7.25362   | 6 | 6 | 5 | 4 | -4.10979     | 16 | 16 | 7  | 5  | 1.70884     | 22 | 22 | 5  | 5  | 5.09244     |
| 9 | 6 | 3 | 4.74012    | 6 | 6 | 5 | 5 | -1.86143     | 16 | 16 | 7  | 6  | 1.63545     | 22 | 22 | 6  | 1  | 0.66180     |
| 9 | 6 | 4 | 3.20005    | 6 | 6 | 6 | 1 | -0.49838     | 16 | 16 | 7  | 7  | -9.02044    | 22 | 22 | 6  | 2  | -2.47202    |
| 9 | 6 | 5 | 8.06098    | 6 | 6 | 6 | 2 | 1.30151      | 16 | 16 | 8  | 1  | -0.49565    | 22 | 22 | 6  | 3  | 0.47518     |
| 9 | 7 | 1 | -4.84202   | 6 | 6 | 6 | 3 | -0.33954     | 16 | 16 | 8  | 3  | 2.46803     | 22 | 22 | 6  | 4  | 0.49827     |
| 9 | 7 | 2 | 1.27571    | 6 | 6 | 6 | 4 | -0.52797     | 16 | 16 | 8  | 4  | -3.00989    | 22 | 22 | 6  | 5  | 0.51658     |
| 9 | 7 | 3 | 3.52894    | 6 | 6 | 6 | 5 | -1.03336     | 16 | 16 | 8  | 5  | 6.71511     | 22 | 22 | 6  | 6  | 2.69594     |
| 9 | 7 | 4 | -28.05564  | 6 | 6 |   |   |              |    |    |    |    |             |    |    |    |    |             |













| I  | J  | K  | F(I,J,K)  | I  | J  | K  | L  | F(I,J,,K,L) | I  | J  | K  | L  | F(I,J,K,L) | I  | J  | K  | L  | F(I,J,K,L) |
|----|----|----|-----------|----|----|----|----|-------------|----|----|----|----|------------|----|----|----|----|------------|
| 23 | 20 | 5  | -7.66216  | 14 | 13 | 13 | 13 | 40.90493    | 21 | 20 | 2  | 2  | 25.79805   | 24 | 24 | 9  | 8  | -2.50748   |
| 23 | 20 | 6  | 13.27859  | 14 | 14 | 1  | 1  | -205.57681  | 21 | 20 | 3  | 3  | 17.97396   | 24 | 24 | 9  | 9  | 1.62249    |
| 23 | 20 | 7  | -9.63117  | 14 | 14 | 2  | 1  | -44.02813   | 21 | 20 | 4  | 4  | 3.28040    | 24 | 24 | 10 | 10 | 1.90339    |
| 23 | 20 | 8  | 19.92695  | 14 | 14 | 2  | 2  | -64.14696   | 21 | 20 | 5  | 5  | -2.60067   | 24 | 24 | 11 | 10 | -0.68822   |
| 23 | 20 | 9  | 2.30839   | 14 | 14 | 3  | 1  | 78.18921    | 21 | 20 | 6  | 6  | 0.11545    | 24 | 24 | 11 | 11 | 4.60862    |
| 23 | 21 | 1  | -49.76850 | 14 | 14 | 3  | 2  | -0.41667    | 21 | 20 | 7  | 7  | 2.42967    | 24 | 24 | 12 | 12 | 1.51851    |
| 23 | 21 | 2  | -62.07622 | 14 | 14 | 3  | 3  | -34.98647   | 21 | 20 | 8  | 8  | -7.39249   | 24 | 24 | 13 | 12 | 0.56503    |
| 23 | 21 | 3  | 27.50636  | 14 | 14 | 4  | 1  | 11.46317    | 21 | 20 | 9  | 9  | -0.91267   | 24 | 24 | 13 | 13 | 1.19780    |
| 23 | 21 | 4  | -2.04369  | 14 | 14 | 4  | 2  | 2.07747     | 21 | 20 | 10 | 10 | -5.36123   | 24 | 24 | 14 | 12 | -3.40853   |
| 23 | 21 | 5  | 13.71436  | 14 | 14 | 4  | 3  | -4.00451    | 21 | 20 | 11 | 11 | -1.49660   | 24 | 24 | 14 | 14 | 7.63766    |
| 23 | 21 | 6  | 8.58864   | 14 | 14 | 4  | 4  | -8.60970    | 21 | 20 | 12 | 12 | -0.79990   | 24 | 24 | 15 | 13 | -1.67519   |
| 23 | 21 | 7  | 5.88838   | 14 | 14 | 5  | 1  | -12.13027   | 21 | 20 | 13 | 13 | -5.01216   | 24 | 24 | 15 | 14 | 5.32348    |
| 23 | 21 | 9  | 5.13109   | 14 | 14 | 5  | 2  | -5.35149    | 21 | 20 | 14 | 14 | 0.66206    | 24 | 24 | 15 | 15 | 6.59334    |
| 23 | 22 | 1  | -5.91041  | 14 | 14 | 5  | 3  | 4.20304     | 21 | 20 | 15 | 15 | -4.05401   | 24 | 24 | 16 | 12 | -2.38774   |
| 23 | 22 | 2  | -32.78326 | 14 | 14 | 5  | 4  | -0.87672    | 21 | 20 | 16 | 16 | -1.63811   | 24 | 24 | 16 | 13 | -1.13364   |
| 23 | 22 | 3  | -32.66506 | 14 | 14 | 5  | 5  | -2.98256    | 21 | 20 | 17 | 17 | 20.27294   | 24 | 24 | 16 | 14 | 0.73231    |
| 23 | 22 | 4  | -11.67116 | 14 | 14 | 6  | 1  | 3.17535     | 21 | 20 | 18 | 18 | 1.17814    | 24 | 24 | 16 | 16 | -1.33562   |
| 23 | 22 | 5  | 10.71833  | 14 | 14 | 6  | 2  | -1.96018    | 21 | 20 | 19 | 19 | 1.75549    | 24 | 24 | 17 | 17 | -12.91387  |
| 23 | 22 | 6  | 4.58137   | 14 | 14 | 6  | 3  | -2.80008    | 21 | 20 | 20 | 17 | -1.83749   | 24 | 24 | 18 | 17 | 1.32812    |
| 23 | 22 | 7  | -3.12229  | 14 | 14 | 6  | 4  | 1.71815     | 21 | 20 | 20 | 18 | -1.98914   | 24 | 24 | 18 | 18 | -1.01272   |
| 23 | 22 | 8  | -10.57456 | 14 | 14 | 6  | 5  | -0.81276    | 21 | 20 | 20 | 19 | -0.67893   | 24 | 24 | 19 | 17 | 0.25645    |
| 23 | 22 | 9  | -5.07049  | 14 | 14 | 6  | 6  | -2.68676    | 21 | 20 | 20 | 20 | 8.17674    | 24 | 24 | 19 | 18 | 3.88247    |
| 23 | 23 | 1  | 203.01063 | 14 | 14 | 7  | 1  | -8.67246    | 21 | 21 | 1  | 1  | -28.72164  | 24 | 24 | 19 | 19 | -3.09557   |
| 23 | 23 | 2  | 26.47876  | 14 | 14 | 7  | 2  | -1.94657    | 21 | 21 | 2  | 1  | 10.32806   | 24 | 24 | 20 | 17 | 0.80194    |
| 23 | 23 | 3  | -69.56444 | 14 | 14 | 7  | 3  | 3.25585     | 21 | 21 | 2  | 2  | -95.45087  | 24 | 24 | 20 | 18 | 2.15742    |
| 23 | 23 | 4  | 9.28566   | 14 | 14 | 7  | 4  | -1.02116    | 21 | 21 | 3  | 1  | -6.38535   | 24 | 24 | 20 | 19 | 5.08445    |
| 23 | 23 | 5  | -13.22657 | 14 | 14 | 7  | 5  | -0.36002    | 21 | 21 | 3  | 2  | -18.19916  | 24 | 24 | 20 | 20 | -9.04457   |
| 23 | 23 | 6  | -3.33568  | 14 | 14 | 7  | 7  | -2.31027    | 21 | 21 | 3  | 3  | -54.58635  | 24 | 24 | 21 | 17 | 0.12737    |
| 23 | 23 | 7  | -21.61564 | 14 | 14 | 8  | 1  | 2.20913     | 21 | 21 | 4  | 1  | 1.12783    | 24 | 24 | 21 | 18 | 1.27865    |
| 23 | 23 | 8  | 17.89508  | 14 | 14 | 8  | 2  | 0.72169     | 21 | 21 | 4  | 2  | 0.18095    | 24 | 24 | 21 | 19 | 1.89607    |
| 23 | 23 | 9  | -27.44015 | 14 | 14 | 8  | 4  | -0.48246    | 21 | 21 | 4  | 3  | 1.73835    | 24 | 24 | 21 | 20 | -1.52393   |
| 24 | 12 | 10 | 5.64710   | 14 | 14 | 8  | 6  | 0.77393     | 21 | 21 | 4  | 4  | 0.71488    | 24 | 24 | 21 | 21 | 7.18235    |
| 24 | 12 | 11 | 1.39269   | 14 | 14 | 9  | 1  | -2.54471    | 21 | 21 | 5  | 1  | -0.90377   | 24 | 24 | 22 | 17 | -0.20925   |
| 24 | 13 | 10 | -3.46504  | 14 | 14 | 9  | 2  | 0.73109     | 21 | 21 | 5  | 2  | -0.40838   | 24 | 24 | 22 | 18 | 2.58683    |
| 24 | 13 | 11 | -2.33199  | 14 | 14 | 9  | 3  | 1.23111     | 21 | 21 | 5  | 3  | -0.36251   | 24 | 24 | 22 | 19 | -4.28213   |
| 24 | 14 | 10 | -3.28256  | 14 | 14 | 9  | 4  | -0.67746    | 21 | 21 | 5  | 4  | -2.11817   | 24 | 24 | 22 | 20 | 2.05138    |
| 24 | 14 | 11 | 0.98244   | 14 | 14 | 9  | 5  | -0.52002    | 21 | 21 | 5  | 5  | 2.58105    | 24 | 24 | 22 | 21 | 0.31549    |
| 24 | 15 | 10 | -5.31380  | 14 | 14 | 9  | 6  | 0.32291     | 21 | 21 | 6  | 1  | 1.16496    | 24 | 24 | 22 | 22 | 4.56147    |
| 24 | 15 | 11 | 8.21603   | 14 | 14 | 9  | 7  | -0.55755    | 21 | 21 | 6  | 2  | -2.61858   | 24 | 24 | 23 | 18 | -3.95528   |
| 24 | 16 | 11 | 8.73294   | 14 | 14 | 9  | 9  | -2.26009    | 21 | 21 | 6  | 3  | 0.26983    | 24 | 24 | 23 | 19 | -8.13196   |
| 24 | 17 | 1  | 1.62214   | 14 | 14 | 10 | 10 | 2.62010     | 21 | 21 | 6  | 4  | 1.05330    | 24 | 24 | 23 | 20 | -3.49256   |
| 24 | 17 | 2  | -4.99979  | 14 | 14 | 11 | 10 | 1.90677     | 21 | 21 | 6  | 5  | -0.13767   | 24 | 24 | 23 | 21 | -3.05490   |
| 24 | 17 | 3  | 13.84703  | 14 | 14 | 11 | 11 | 3.22644     | 21 | 21 | 6  | 6  | 1.65151    | 24 | 24 | 23 | 22 | -1.42318   |
| 24 | 17 | 4  | -22.22595 | 14 | 14 | 12 | 12 | 35.45306    | 21 | 21 | 7  | 1  | -0.49149   | 24 | 24 | 23 | 23 | 20.28081   |
| 24 | 17 | 5  | 35.44745  | 14 | 14 | 13 | 12 | 6.14355     | 21 | 21 | 7  | 2  | 0.18031    | 24 | 24 | 24 | 17 | 0.54470    |
| 24 | 17 | 6  | -16.29739 | 14 | 14 | 13 | 13 | 27.71495    | 21 | 21 | 7  | 3  | -0.27340   | 24 | 24 | 24 | 18 | -4.86022   |
| 24 | 17 | 7  | 2.43436   | 14 | 14 | 14 | 12 | -68.56127   | 21 | 21 | 7  | 4  | -0.11005   | 24 | 24 | 24 | 19 | -0.88190   |
| 24 | 17 | 8  | 52.93155  | 14 | 14 | 14 | 13 | -5.66820    | 21 | 21 | 7  | 5  | 0.31506    | 24 | 24 | 24 | 20 | -2.89787   |
| 24 | 17 | 9  | -26.90370 | 14 | 14 | 14 | 14 | 138.81685   | 21 | 21 | 7  | 6  | -0.32363   | 24 | 24 | 24 | 21 | -2.69677   |
| 24 | 18 | 1  | -43.04636 | 15 | 12 | 1  | 1  | 54.24241    | 21 | 21 | 7  | 7  | -0.51906   | 24 | 24 | 24 | 22 | -2.84018   |
| 24 | 18 | 2  | 14.63074  | 15 | 12 | 2  | 2  | -20.38769   | 21 | 21 | 8  | 1  | -0.43443   | 24 | 24 | 24 | 23 | 9.86649    |
| 24 | 18 | 3  | -3.60756  | 15 | 12 | 3  | 3  | -58.66508   | 21 | 21 | 8  | 2  | -0.37943   | 24 | 24 | 24 | 24 | 11.06285   |
| 24 | 18 | 4  | 6.91592   | 15 | 12 | 4  | 4  | 3.84914     | 21 | 21 | 8  | 3  | 0.39246    |    |    |    |    |            |

Table S36: The quartic potential energy surface of Pyridazine. The calculation was done by using B3LYP/6-311++G(2d,2p) method. The force constants (F<sub>I</sub>) are in cm<sup>-1</sup> units.

| I J   | F <sub>I</sub> (I,J)   | I J K   | F <sub>I</sub> (I,J,K)   | I J K L     | F <sub>I</sub> (I,J,K,L) | I J K L     | F <sub>I</sub> (I,J,K,L) |
|-------|------------------------|---------|--------------------------|-------------|--------------------------|-------------|--------------------------|
| 1 1   | 3200.70313             | 24 18 5 | -10.12243                | 14 14 4 2   | -0.87024                 | 21 21 9 1   | 1.55280                  |
| 2 2   | 3175.14891             | 24 18 6 | -17.61858                | 14 14 4 3   | 4.50664                  | 21 21 9 2   | 4.63014                  |
| 3 3   | 1608.51241             | 24 18 7 | -63.53064                | 14 14 4 4   | 20.38354                 | 21 21 9 3   | 0.51660                  |
| 4 4   | 1481.58571             | 24 18 8 | -11.92807                | 14 14 5 1   | -4.00827                 | 21 21 9 4   | -4.67341                 |
| 5 5   | 1177.34505             | 24 18 9 | -5.00905                 | 14 14 5 2   | -0.56958                 | 21 21 9 5   | -3.38714                 |
| 6 6   | 1173.32161             | 24 19 1 | 44.53643                 | 14 14 5 3   | -2.48236                 | 21 21 9 6   | -1.88026                 |
| 7 7   | 1089.17819             | 24 19 2 | 44.84720                 | 14 14 5 4   | 10.69347                 | 21 21 9 7   | -1.02769                 |
| 8 8   | 1005.92048             | 24 19 4 | 5.75744                  | 14 14 5 5   | 12.01382                 | 21 21 9 8   | 0.20366                  |
| 9 9   | 682.93268              | 24 19 5 | 0.96533                  | 14 14 6 1   | 1.06851                  | 21 21 9 9   | -2.42931                 |
| 10 10 | 1018.22908             | 24 19 6 | -16.34774                | 14 14 6 2   | 4.42663                  | 21 21 10 10 | 8.03445                  |
| 11 11 | 942.76231              | 24 19 7 | 11.84004                 | 14 14 6 3   | 7.23818                  | 21 21 11 10 | -14.70701                |
| 12 12 | 773.45213              | 24 19 8 | -21.56119                | 14 14 6 4   | -2.80399                 | 21 21 11 11 | 24.13768                 |
| 13 13 | 376.35638              | 24 19 9 | 20.37048                 | 14 14 6 5   | -8.41981                 | 21 21 12 10 | -0.16555                 |
| 14 14 | 984.70497              | 24 20 1 | -35.61233                | 14 14 6 6   | 4.88732                  | 21 21 12 11 | -2.43489                 |
| 15 15 | 760.70948              | 24 20 2 | 59.81501                 | 14 14 7 1   | 1.06822                  | 21 21 12 12 | -5.74944                 |
| 16 16 | 374.68890              | 24 20 3 | 17.28551                 | 14 14 7 2   | -2.73530                 | 21 21 13 10 | 2.76848                  |
| 17 17 | 3187.76330             | 24 20 4 | 21.78742                 | 14 14 7 3   | 4.58475                  | 21 21 13 11 | -5.54452                 |
| 18 18 | 3170.54505             | 24 20 5 | -32.21708                | 14 14 7 4   | 18.35774                 | 21 21 13 12 | 4.15929                  |
| 19 19 | 1602.52826             | 24 20 6 | -10.64315                | 14 14 7 5   | 5.30815                  | 21 21 13 13 | -3.63882                 |
| 20 20 | 1446.62251             | 24 20 7 | -4.05701                 | 14 14 7 6   | 2.55138                  | 21 21 14 14 | 18.76783                 |
| 21 21 | 1314.98529             | 24 20 8 | -5.52067                 | 14 14 7 7   | 11.25408                 | 21 21 15 14 | 17.23309                 |
| 22 22 | 1086.59894             | 24 20 9 | 6.86720                  | 14 14 8 1   | 0.23693                  | 21 21 15 15 | 14.18390                 |
| 23 23 | 1062.87007             | 24 21 1 | -26.15342                | 14 14 8 2   | -1.44833                 | 21 21 16 14 | 10.95788                 |
| 24 24 | 637.32132              | 24 21 2 | -79.91099                | 14 14 8 3   | 1.98197                  | 21 21 16 15 | 6.79122                  |
|       |                        | 24 21 3 | 2.82939                  | 14 14 8 4   | 4.48462                  | 21 21 16 16 | -13.50092                |
| I J K | F <sub>I</sub> (I,J,K) | 24 21 4 | 17.78116                 | 14 14 8 5   | 0.71807                  | 21 21 17 17 | -42.50183                |
|       |                        | 24 21 5 | -7.77016                 | 14 14 8 6   | 0.45415                  | 21 21 18 17 | -64.20372                |
| 1 1 1 | -1232.42693            | 24 21 6 | -2.11239                 | 14 14 8 7   | 3.70736                  | 21 21 18 18 | -97.86866                |
| 2 1 1 | 261.65798              | 24 21 7 | 0.42696                  | 14 14 9 1   | 0.57147                  | 21 21 19 17 | 0.20802                  |
| 2 2 1 | -500.53744             | 24 21 8 | -15.78713                | 14 14 9 2   | 1.27939                  | 21 21 19 18 | 0.31948                  |
| 2 2 2 | -1165.97845            | 24 21 9 | 8.56009                  | 14 14 9 3   | 3.30079                  | 21 21 19 19 | 20.50254                 |
| 3 1 1 | -21.60942              | 24 22 1 | 47.48185                 | 14 14 9 4   | -2.90244                 | 21 21 20 17 | 0.53500                  |
| 3 2 1 | 6.96956                | 24 22 2 | 16.30761                 | 14 14 9 5   | -5.83800                 | 21 21 20 18 | 0.06147                  |
| 3 2 2 | -6.40272               | 24 22 3 | 0.94314                  | 14 14 9 6   | 4.54820                  | 21 21 20 19 | 17.03536                 |
| 3 3 1 | 104.72881              | 24 22 4 | 13.08686                 | 14 14 9 7   | -0.95526                 | 21 21 20 20 | 13.47523                 |
| 3 3 2 | -33.19945              | 24 22 5 | 13.74759                 | 14 14 9 8   | 0.40168                  | 21 21 21 17 | 5.83085                  |
| 3 3 3 | -193.22688             | 24 22 6 | -18.56563                | 14 14 9 9   | 2.04839                  | 21 21 21 18 | 8.89113                  |
| 4 1 1 | -28.00789              | 24 22 7 | -27.54737                | 14 14 10 10 | 137.59180                | 21 21 21 19 | -14.23513                |
| 4 2 1 | 0.83187                | 24 22 8 | -4.21686                 | 14 14 11 10 | -51.89176                | 21 21 21 20 | -9.24472                 |
| 4 2 2 | -22.38567              | 24 22 9 | -5.57215                 | 14 14 11 11 | 185.87595                | 21 21 21 21 | 40.57958                 |
| 4 3 1 | 3.84269                | 24 23 1 | -9.81709                 | 14 14 12 10 | 7.47857                  | 22 17 1 1   | 2.80588                  |
| 4 3 2 | 37.18122               | 24 23 2 | 0.61020                  | 14 14 12 11 | -18.71835                | 22 17 2 2   | 1.99063                  |
| 4 3 3 | 17.55009               | 24 23 3 | -8.25588                 | 14 14 12 12 | 12.36935                 | 22 17 3 3   | 1.51587                  |
| 4 4 1 | 54.90048               | 24 23 4 | -17.30433                | 14 14 13 10 | 42.89780                 | 22 17 4 4   | 1.39329                  |
| 4 4 2 | 173.28266              | 24 23 5 | -2.37535                 | 14 14 13 11 | -7.15125                 | 22 17 5 5   | -1.66670                 |
| 4 4 3 | 25.76615               | 24 23 6 | 23.72194                 | 14 14 13 12 | 7.61103                  | 22 17 6 6   | -2.20886                 |
| 4 4 4 | -34.25450              | 24 23 7 | 8.58606                  | 14 14 13 13 | 19.08333                 | 22 17 7 7   | 1.01637                  |
| 5 1 1 | -1.17253               | 24 23 8 | 0.42216                  | 14 14 14 14 | 168.82627                | 22 17 8 8   | -1.40144                 |
| 5 2 1 | 2.05693                | 24 23 9 | -9.21967                 | 15 14 1 1   | 157.35004                | 22 17 9 9   | -0.77770                 |
| 5 2 2 | -2.08161               | 24 24 1 | 22.28577                 | 15 14 2 2   | -157.72595               | 22 17 10 10 | 0.65976                  |
| 5 3 1 | -82.71564              | 24 24 2 | 30.47828                 | 15 14 3 3   | -7.86973                 | 22 17 11 11 | -1.77016                 |
| 5 3 2 | 46.08322               | 24 24 3 | 14.26224                 | 15 14 4 4   | 19.11338                 | 22 17 12 12 | 0.50656                  |
| 5 3 3 | -65.37795              | 24 24 4 | -10.01507                | 15 14 5 5   | -10.50649                | 22 17 13 13 | 1.44175                  |
| 5 4 1 | 20.20013               | 24 24 5 | 6.79684                  | 15 14 6 6   | -14.53355                | 22 17 14 14 | 3.48053                  |
| 5 4 2 | 75.89461               | 24 24 6 | -1.30255                 | 15 14 7 7   | 8.13375                  | 22 17 15 15 | -2.01140                 |
| 5 4 3 | -8.54458               | 24 24 7 | -0.68026                 | 15 14 8 8   | -0.41372                 | 22 17 17 17 | 0.32264                  |
| 5 4 4 | 16.64893               | 24 24 8 | -9.98487                 | 15 14 9 9   | -4.02545                 | 22 18 1 1   | -2.66191                 |
| 5 5 1 | 163.41188              |         |                          | 15 14 10 10 | -73.90401                | 22 18 2 2   | 1.78278                  |
| 5 5 2 | 0.34839                | I J K L | F <sub>I</sub> (I,J,K,L) | 15 14 11 11 | 78.56950                 | 22 18 3 3   | 2.15051                  |
| 5 5 3 | -4.66523               |         |                          | 15 14 12 12 | 0.90708                  | 22 18 4 4   | 3.25916                  |
| 5 5 4 | -26.94357              | 1 1 1 1 | 454.99419                | 15 14 13 13 | -16.82976                | 22 18 5 5   | 0.82035                  |
| 5 5 5 | -4.61680               | 2 1 1 1 | -129.08170               | 15 14 14 14 | 58.19239                 | 22 18 6 6   | 1.04249                  |
| 6 1 1 | 0.66240                | 2 2 1 1 | 91.28296                 | 15 15 1 1   | -330.01840               | 22 18 7 7   | 0.99265                  |
| 6 2 1 | 10.64536               | 2 2 2 1 | 129.31803                | 15 15 2 1   | 55.34969                 | 22 18 8 8   | 0.57293                  |
| 6 2 2 | 27.53382               | 2 2 2 2 | 462.15001                | 15 15 2 2   | -172.77801               | 22 18 9 9   | 0.39477                  |
| 6 3 1 | 97.06318               | 3 1 1 1 | 9.89797                  | 15 15 3 1   | -3.58487                 | 22 18 10 10 | 1.92301                  |
| 6 3 2 | -32.43208              | 3 2 1 1 | -3.60810                 | 15 15 3 2   | 0.63389                  | 22 18 11 11 | 3.09787                  |
| 6 3 3 | -43.80325              | 3 2 2 1 | 1.24818                  | 15 15 3 3   | 12.38755                 | 22 18 12 12 | -0.14575                 |
| 6 4 1 | -8.73000               | 3 2 2 2 | -1.76766                 | 15 15 4 1   | -5.55511                 | 22 18 13 13 | -1.00732                 |
| 6 4 2 | -21.95949              | 3 3 1 1 | -55.33572                | 15 15 4 2   | 1.64372                  | 22 18 14 14 | 2.80762                  |
| 6 4 3 | -60.80043              | 3 3 2 1 | 14.73219                 | 15 15 4 3   | 3.30377                  | 22 18 15 15 | 0.31902                  |
| 6 4 4 | 39.63640               | 3 3 2 2 | -14.07941                | 15 15 4 4   | 12.81345                 | 22 18 16 16 | -0.53508                 |
| 6 5 1 | -118.55848             | 3 3 3 1 | -7.26334                 | 15 15 5 1   | -1.69153                 | 22 18 17 17 | -0.05205                 |
| 6 5 2 | 37.17546               | 3 3 3 2 | -0.57984                 | 15 15 5 2   | 2.57923                  | 22 18 18 17 | 1.98102                  |
| 6 5 3 | 50.65341               | 3 3 3 3 | 48.44358                 | 15 15 5 3   | -18.76556                | 22 18 18 18 | 0.57532                  |
| 6 5 4 | -25.32504              | 4 1 1 1 | 10.16029                 | 15 15 5 4   | 8.65987                  | 22 19 1 1   | -45.49825                |
| 6 5 5 | -21.67644              | 4 2 1 1 | -1.46157                 | 15 15 5 5   | 35.95353                 | 22 19 2 2   | -29.29182                |
| 6 6 1 | 111.65922              | 4 2 2 1 | 4.60595                  | 15 15 6 1   | 1.13401                  | 22 19 3 3   | 6.54935                  |
| 6 6 2 | -27.57516              | 4 2 2 2 | 8.00252                  | 15 15 6 2   | 4.80505                  | 22 19 4 4   | -0.81926                 |
| 6 6 3 | 84.75960               | 4 3 1 1 | -6.40232                 | 15 15 6 3   | 18.71391                 | 22 19 5 5   | 11.74517                 |
| 6 6 4 | 61.31425               | 4 3 2 2 | -31.29006                | 15 15 6 5   | -27.83287                | 22 19 6 6   | 13.10632                 |
| 6 6 5 | -104.77004             | 4 3 3 1 | -1.03743                 | 15 15 6 6   | 20.67469                 | 22 19 7 7   | 1.64234                  |
| 6 6 6 | -192.92358             | 4 3 3 2 | -1.03041                 | 15 15 7 1   | 7.12467                  | 22 19 8 8   | -6.36886                 |
| 7 1 1 | 30.20722               | 4 3 3 3 | -0.41252                 | 15 15 7 2   | -1.37006                 | 22 19 9 9   | 3.01446                  |
| 7 2 1 | -8.86130               | 4 4 1 1 | -14.19080                | 15 15 7 3   | 9.78671                  | 22 19 10 10 | 9.63971                  |





| I  | J  | K | F(I,J,K)   | I | J | K | L | F(I,J,K,L) | I  | J  | K  | L  | F(I,J,K,L) | I  | J  | K  | L  | F(I,J,K,L) |
|----|----|---|------------|---|---|---|---|------------|----|----|----|----|------------|----|----|----|----|------------|
| 9  | 7  | 7 | -26.87796  | 7 | 3 | 3 | 1 | 4.45117    | 16 | 16 | 7  | 7  | -1.28891   | 22 | 22 | 8  | 3  | 1.23585    |
| 9  | 8  | 1 | 12.73723   | 7 | 3 | 3 | 2 | -3.69068   | 16 | 16 | 8  | 1  | -0.40515   | 22 | 22 | 8  | 4  | 3.45960    |
| 9  | 8  | 2 | -10.93800  | 7 | 3 | 3 | 3 | -32.48486  | 16 | 16 | 8  | 2  | -1.05656   | 22 | 22 | 8  | 5  | -7.61669   |
| 9  | 8  | 3 | -15.56334  | 7 | 4 | 1 | 1 | -10.65011  | 16 | 16 | 8  | 3  | 7.49046    | 22 | 22 | 8  | 6  | 0.41025    |
| 9  | 8  | 4 | 22.59486   | 7 | 4 | 2 | 2 | -90.89350  | 16 | 16 | 8  | 4  | -3.97491   | 22 | 22 | 8  | 7  | -2.67662   |
| 9  | 8  | 5 | -22.56722  | 7 | 4 | 3 | 3 | 0.75705    | 16 | 16 | 8  | 5  | 2.45340    | 22 | 22 | 8  | 8  | 4.86916    |
| 9  | 8  | 6 | 1.95505    | 7 | 4 | 4 | 1 | -0.33313   | 16 | 16 | 8  | 6  | -0.43201   | 22 | 22 | 9  | 1  | -1.76786   |
| 9  | 8  | 7 | -13.38260  | 7 | 4 | 4 | 2 | -1.33017   | 16 | 16 | 8  | 7  | 2.85517    | 22 | 22 | 9  | 2  | 1.94573    |
| 9  | 9  | 1 | 41.43333   | 7 | 4 | 4 | 3 | 10.96730   | 16 | 16 | 8  | 8  | -9.81509   | 22 | 22 | 9  | 3  | 12.29120   |
| 9  | 9  | 2 | -8.76266   | 7 | 4 | 4 | 4 | 20.03131   | 16 | 16 | 9  | 2  | -1.09224   | 22 | 22 | 9  | 4  | -4.01677   |
| 9  | 9  | 3 | -6.85637   | 7 | 5 | 1 | 1 | 33.21664   | 16 | 16 | 9  | 3  | -1.48401   | 22 | 22 | 9  | 5  | -12.51481  |
| 9  | 9  | 4 | 6.53794    | 7 | 5 | 2 | 2 | -40.91339  | 16 | 16 | 9  | 4  | 0.93437    | 22 | 22 | 9  | 6  | 9.12197    |
| 9  | 9  | 5 | -2.45520   | 7 | 5 | 3 | 3 | -17.48177  | 16 | 16 | 9  | 5  | -4.18827   | 22 | 22 | 9  | 7  | 4.30649    |
| 9  | 9  | 6 | 2.15096    | 7 | 5 | 4 | 4 | 15.53421   | 16 | 16 | 9  | 6  | -0.41383   | 22 | 22 | 9  | 8  | -2.02968   |
| 9  | 9  | 7 | 7.83089    | 7 | 5 | 5 | 1 | 2.38000    | 16 | 16 | 9  | 7  | 3.93216    | 22 | 22 | 9  | 9  | 5.71277    |
| 9  | 9  | 8 | -15.78982  | 7 | 5 | 5 | 2 | 0.08521    | 16 | 16 | 9  | 8  | 2.18740    | 22 | 22 | 10 | 10 | 14.09765   |
| 9  | 9  | 9 | -6.76459   | 7 | 5 | 5 | 3 | 5.04126    | 16 | 16 | 10 | 10 | 32.27510   | 22 | 22 | 11 | 10 | 10.04735   |
| 10 | 10 | 1 | 374.39527  | 7 | 5 | 5 | 4 | 7.78889    | 16 | 16 | 11 | 10 | -18.38561  | 22 | 22 | 11 | 11 | 9.06986    |
| 10 | 10 | 2 | 26.09033   | 7 | 5 | 5 | 5 | -11.21674  | 16 | 16 | 11 | 11 | 55.23073   | 22 | 22 | 12 | 10 | 3.76214    |
| 10 | 10 | 3 | -1.51077   | 7 | 6 | 1 | 1 | -30.68372  | 16 | 16 | 12 | 10 | 4.87024    | 22 | 22 | 12 | 11 | -0.13969   |
| 10 | 10 | 4 | 2.62220    | 7 | 6 | 2 | 2 | -0.52656   | 16 | 16 | 12 | 11 | -3.52364   | 22 | 22 | 12 | 12 | -5.02264   |
| 10 | 10 | 5 | 1.48725    | 7 | 6 | 3 | 3 | -3.72163   | 16 | 16 | 12 | 12 | 8.85160    | 22 | 22 | 13 | 10 | 9.16743    |
| 10 | 10 | 6 | 0.92952    | 7 | 6 | 4 | 4 | -7.57368   | 16 | 16 | 13 | 10 | 11.74924   | 22 | 22 | 13 | 11 | 4.53859    |
| 10 | 10 | 7 | 14.91294   | 7 | 6 | 5 | 5 | 5.69417    | 16 | 16 | 13 | 11 | -3.77170   | 22 | 22 | 13 | 12 | -4.04355   |
| 10 | 10 | 8 | -8.02230   | 7 | 6 | 6 | 1 | 0.96889    | 16 | 16 | 13 | 13 | 14.52450   | 22 | 22 | 13 | 13 | -4.64890   |
| 11 | 10 | 1 | 157.79071  | 7 | 6 | 6 | 2 | 0.05905    | 16 | 16 | 14 | 14 | 49.27222   | 22 | 22 | 14 | 14 | 5.57396    |
| 11 | 10 | 2 | -303.18573 | 7 | 6 | 6 | 3 | 10.95541   | 16 | 16 | 15 | 14 | 22.91406   | 22 | 22 | 15 | 14 | -10.89914  |
| 11 | 10 | 3 | -16.31724  | 7 | 6 | 6 | 4 | -1.70999   | 16 | 16 | 15 | 15 | 59.66567   | 22 | 22 | 15 | 15 | 24.35882   |
| 11 | 10 | 4 | 7.34656    | 7 | 6 | 6 | 5 | -17.25868  | 16 | 16 | 16 | 14 | 23.69287   | 22 | 22 | 16 | 14 | 7.19163    |
| 11 | 10 | 5 | -16.66381  | 7 | 6 | 6 | 6 | -16.88272  | 16 | 16 | 16 | 15 | 13.26837   | 22 | 22 | 16 | 15 | -6.76036   |
| 11 | 10 | 6 | 4.73769    | 7 | 7 | 1 | 1 | -19.27785  | 16 | 16 | 16 | 16 | 59.98122   | 22 | 22 | 16 | 16 | -7.78226   |
| 11 | 10 | 7 | 3.54090    | 7 | 7 | 2 | 1 | -14.58695  | 17 | 17 | 1  | 1  | 361.87770  | 22 | 22 | 17 | 17 | -66.35101  |
| 11 | 10 | 8 | 4.94977    | 7 | 7 | 2 | 2 | -61.94278  | 17 | 17 | 2  | 1  | -62.65569  | 22 | 22 | 18 | 17 | 34.05610   |
| 11 | 10 | 9 | 7.03985    | 7 | 7 | 3 | 1 | -3.95859   | 17 | 17 | 2  | 2  | 187.18436  | 22 | 22 | 18 | 18 | -37.83706  |
| 11 | 11 | 1 | 282.39258  | 7 | 7 | 3 | 2 | -0.66547   | 17 | 17 | 3  | 1  | 5.76040    | 22 | 22 | 19 | 17 | 0.65423    |
| 11 | 11 | 2 | 345.83740  | 7 | 7 | 3 | 3 | 32.20662   | 17 | 17 | 3  | 2  | -2.50091   | 22 | 22 | 19 | 18 | 2.08051    |
| 11 | 11 | 3 | 9.39910    | 7 | 7 | 4 | 1 | -0.89376   | 17 | 17 | 3  | 3  | -46.03648  | 22 | 22 | 19 | 19 | 18.02704   |
| 11 | 11 | 4 | 6.97993    | 7 | 7 | 4 | 2 | -1.76737   | 17 | 17 | 4  | 1  | 8.44385    | 22 | 22 | 20 | 17 | 1.91958    |
| 11 | 11 | 5 | -22.15980  | 7 | 7 | 4 | 3 | -2.29463   | 17 | 17 | 4  | 2  | 1.61845    | 22 | 22 | 20 | 18 | 1.50689    |
| 11 | 11 | 6 | -19.82216  | 7 | 7 | 4 | 4 | 25.61403   | 17 | 17 | 4  | 3  | -12.62653  | 22 | 22 | 20 | 19 | -10.26203  |
| 11 | 11 | 7 | 14.15496   | 7 | 7 | 5 | 1 | -1.76822   | 17 | 17 | 4  | 4  | -45.81071  | 22 | 22 | 20 | 20 | 20.91477   |
| 11 | 11 | 8 | 7.10691    | 7 | 7 | 5 | 2 | 0.45587    | 17 | 17 | 5  | 1  | 1.68500    | 22 | 22 | 21 | 17 | -0.97260   |
| 11 | 11 | 9 | 2.22711    | 7 | 7 | 5 | 3 | 11.19276   | 17 | 17 | 5  | 2  | 1.19325    | 22 | 22 | 21 | 18 | -0.70205   |
| 12 | 10 | 1 | 48.40402   | 7 | 7 | 5 | 4 | 6.48399    | 17 | 17 | 5  | 3  | 53.46539   | 22 | 22 | 21 | 19 | -0.50251   |
| 12 | 10 | 2 | 26.95678   | 7 | 7 | 5 | 5 | 17.61168   | 17 | 17 | 5  | 4  | -18.36028  | 22 | 22 | 21 | 20 | -2.18310   |
| 12 | 10 | 3 | -1.33787   | 7 | 7 | 6 | 1 | 0.41070    | 17 | 17 | 5  | 5  | -94.67826  | 22 | 22 | 21 | 21 | 5.75729    |
| 12 | 10 | 4 | -1.97506   | 7 | 7 | 6 | 2 | 2.48711    | 17 | 17 | 6  | 1  | -1.69783   | 22 | 22 | 22 | 17 | -2.72347   |
| 12 | 10 | 5 | -0.48124   | 7 | 7 | 6 | 3 | 6.04031    | 17 | 17 | 6  | 2  | -3.04642   | 22 | 22 | 22 | 18 | 3.29475    |
| 12 | 10 | 6 | -1.31244   | 7 | 7 | 6 | 4 | 4.25792    | 17 | 17 | 6  | 3  | -47.90569  | 22 | 22 | 22 | 19 | 4.05345    |
| 12 | 10 | 7 | 5.37252    | 7 | 7 | 6 | 5 | -3.91231   | 17 | 17 | 6  | 4  | -1.77091   | 22 | 22 | 22 | 20 | -20.12147  |
| 12 | 10 | 8 | -2.00353   | 7 | 7 | 6 | 6 | 13.88264   | 17 | 17 | 6  | 5  | 68.08308   | 22 | 22 | 22 | 21 | -9.66704   |
| 12 | 10 | 9 | 1.68264    | 7 | 7 | 7 | 1 | 2.35792    | 17 | 17 | 6  | 6  | -56.51382  | 22 | 22 | 22 | 22 | 20.84422   |
| 12 | 11 | 1 | 2.84113    | 7 | 7 | 7 | 2 | -1.97012   | 17 | 17 | 7  | 1  | -7.97187   | 23 | 17 | 1  | 1  | -0.51421   |
| 12 | 11 | 2 | -72.19533  | 7 | 7 | 7 | 3 | -13.02373  | 17 | 17 | 7  | 2  | 3.29724    | 23 | 17 | 2  | 2  | 0.44343    |
| 12 | 11 | 3 | -6.72053   | 7 | 7 | 7 | 4 | 6.40566    | 17 | 17 | 7  | 3  | -27.00310  | 23 | 17 | 3  | 3  | -1.44401   |
| 12 | 11 | 4 | -6.77977   | 7 | 7 | 7 | 5 | -3.30590   | 17 | 17 | 7  | 4  | -31.64009  | 23 | 17 | 4  | 4  | -0.05668   |
| 12 | 11 | 5 | 1.00850    | 7 | 7 | 7 | 6 | -10.39038  | 17 | 17 | 7  | 5  | 14.77195   | 23 | 17 | 5  | 5  | -2.65045   |
| 12 | 11 | 6 | 12.75840   | 7 | 7 | 7 | 7 | 32.63994   | 17 | 17 | 7  | 6  | -22.98878  | 23 | 17 | 6  | 6  | -0.21417   |
| 12 | 11 | 7 | -2.85206   | 8 | 1 | 1 | 1 | 8.44084    | 17 | 17 | 7  | 7  | -31.09985  | 23 | 17 | 7  | 7  | -0.78698   |
| 12 | 11 | 8 | -1.99807   | 8 | 2 | 1 | 1 | -1.56033   | 17 | 17 | 8  | 1  | 7.11136    | 23 | 17 | 8  | 8  | 0.43904    |
| 12 | 11 | 9 | -6.52508   | 8 | 2 | 2 | 1 | 4.27166    | 17 | 17 | 8  | 2  | 1.59549    | 23 | 17 | 9  | 9  | -0.83527   |
| 12 | 12 | 1 | -0.82124   | 8 | 2 | 2 | 2 | 9.91014    | 17 | 17 | 8  | 3  | -11.88495  | 23 | 17 | 10 | 10 | -2.90301   |
| 12 | 12 | 2 | 4.68006    | 8 | 3 | 1 | 1 | -13.91579  | 17 | 17 | 8  | 4  | -6.35724   | 23 | 17 | 12 | 12 | -0.14545   |
| 12 | 12 | 3 | -5.28756   | 8 | 3 | 2 | 2 | -5.02488   | 17 | 17 | 8  | 5  | 11.65133   | 23 | 17 | 13 | 13 | 1.13885    |
| 12 | 12 | 4 | -4.42879   | 8 | 3 | 3 | 1 | -0.79834   | 17 | 17 | 8  | 6  | -11.90898  | 23 | 17 | 14 | 14 | -1.36411   |
| 12 | 12 | 5 | 7.42259    | 8 | 3 | 3 | 2 | 0.91803    | 17 | 17 | 8  | 7  | -9.30708   | 23 | 17 | 15 | 15 | -2.60961   |
| 12 | 12 | 6 | 15.62785   | 8 | 3 | 3 | 3 | 8.36246    | 17 | 17 | 8  | 8  | -3.46786   | 23 | 17 | 16 | 16 | -0.65491   |
| 12 | 12 | 7 | -7.72752   | 8 | 4 | 1 | 1 | -2.52394   | 17 | 17 | 9  | 1  | -0.57539   | 23 | 17 | 17 | 17 | 0.55639    |
| 12 | 12 | 8 | 10.97864   | 8 | 4 | 2 | 2 | -18.23601  | 17 | 17 | 9  | 2  | 0.29199    | 23 | 18 | 1  | 1  | 0.93248    |
| 12 | 12 | 9 | -2.71638   | 8 | 4 | 3 | 3 | -1.73689   | 17 | 17 | 9  | 3  | -25.75603  | 23 | 18 | 2  | 2  | 1.20550    |
| 13 | 10 | 1 | 189.29925  | 8 | 4 | 4 | 1 | -0.63858   | 17 | 17 | 9  | 4  | 3.03069    | 23 | 18 | 3  | 3  | 1.44322    |
| 13 | 10 | 2 | -11.51392  | 8 | 4 | 4 | 2 | -0.93633   | 17 | 17 | 9  | 5  | 40.90841   | 23 | 18 | 4  | 4  | 0.65536    |
| 13 | 10 | 3 | -24.49198  | 8 | 4 | 4 | 3 | 1.00950    | 17 | 17 | 9  | 6  | -31.79883  | 23 | 18 | 5  | 5  | 2.97699    |
| 13 | 10 | 4 | -24.70552  | 8 | 4 | 4 | 4 | 5.99161    | 17 | 17 | 9  | 7  | -10.30486  | 23 | 18 | 6  | 6  | 2.02666    |
| 13 | 10 | 5 | 6.57746    | 8 | 5 | 1 | 1 | 18.17262   | 17 | 17 | 9  | 8  | -6.07747   | 23 | 18 | 7  | 7  | 1.76462    |
| 13 | 10 | 6 | 2.24860    | 8 | 5 | 2 | 2 | -6.99092   | 17 | 17 | 9  | 9  | -19.37388  | 23 | 18 | 8  | 8  | 0.17040    |
| 13 | 10 | 7 | 5.34738    | 8 | 5 | 3 | 3 | -0.41843   | 17 | 17 | 10 | 10 | -199.25750 | 23 | 18 | 9  | 9  | 0.09762    |
| 13 | 10 | 8 | -7.04352   | 8 | 5 | 5 | 1 | -1.52221   | 17 | 17 | 11 | 10 | -65.48239  | 23 | 18 | 10 | 10 | 2.18683    |
| 13 | 11 | 1 | 91.77753   | 8 | 5 | 5 | 2 | -0.36854   | 17 | 17 | 11 | 11 | -161.43238 | 23 | 18 | 11 | 11 | 1.20150    |
| 13 | 11 | 2 | -110.85728 | 8 | 5 | 5 | 3 | 0.91633    | 17 | 17 | 12 | 10 | -24.14952  | 23 | 18 | 12 | 12 | -0.61073   |
| 13 | 11 | 3 | -8.37739   | 8 | 5 |   |   |            |    |    |    |    |            |    |    |    |    |            |

| I J K    | FI(I,J,K)   | I J K L | FI(I,J,K,L) | I J K L     | FI(I,J,K,L) | I J K L     | FI(I,J,K,L) |
|----------|-------------|---------|-------------|-------------|-------------|-------------|-------------|
| 13 12 4  | 29.86205    | 8 6 6 3 | -0.40443    | 17 17 16 14 | -75.85652   | 23 19 3 3   | -4.62723    |
| 13 12 5  | -13.40071   | 8 6 6 4 | -7.30305    | 17 17 16 15 | 35.06168    | 23 19 4 4   | 6.48727     |
| 13 12 6  | -20.96511   | 8 6 6 5 | -3.87803    | 17 17 16 16 | -39.27599   | 23 19 5 5   | -3.96099    |
| 13 12 7  | -30.78879   | 8 6 6 6 | -4.62163    | 17 17 17 17 | 318.33312   | 23 19 6 6   | -9.46994    |
| 13 12 8  | -6.06927    | 8 7 1 1 | -8.06216    | 18 17 1 1   | -206.98396  | 23 19 7 7   | -1.83493    |
| 13 12 9  | 4.41488     | 8 7 2 2 | -12.69653   | 18 17 2 2   | 207.41058   | 23 19 8 8   | 6.02122     |
| 13 13 1  | 79.24014    | 8 7 3 3 | -1.39590    | 18 17 3 3   | 24.20489    | 23 19 9 9   | -2.40058    |
| 13 13 2  | -13.09084   | 8 7 4 4 | 9.87547     | 18 17 4 4   | -68.01955   | 23 19 10 10 | -4.25701    |
| 13 13 3  | 67.81091    | 8 7 5 5 | 0.27833     | 18 17 5 5   | 38.32711    | 23 19 11 11 | -0.74912    |
| 13 13 4  | -39.86347   | 8 7 6 6 | 11.40332    | 18 17 6 6   | 36.17971    | 23 19 13 13 | -1.72109    |
| 13 13 5  | 38.22473    | 8 7 7 1 | -0.67085    | 18 17 7 7   | -23.18793   | 23 19 14 14 | -0.85236    |
| 13 13 6  | 4.52408     | 8 7 7 2 | -0.99517    | 18 17 8 8   | 0.50014     | 23 19 15 15 | -4.12129    |
| 13 13 7  | -44.04475   | 8 7 7 3 | 7.90777     | 18 17 9 9   | 11.51051    | 23 19 16 16 | 0.93094     |
| 13 13 8  | 64.95443    | 8 7 7 4 | -7.01319    | 18 17 10 10 | 68.48556    | 23 19 17 17 | 12.87815    |
| 13 13 9  | -5.05277    | 8 7 7 5 | 1.51285     | 18 17 11 11 | -75.09675   | 23 19 18 18 | 5.85263     |
| 14 14 1  | 252.93698   | 8 7 7 6 | -12.86637   | 18 17 12 12 | -2.59725    | 23 19 19 19 | 0.06116     |
| 14 14 2  | 286.06512   | 8 7 7 7 | 13.43440    | 18 17 13 13 | 18.43592    | 23 19 19 18 | 0.71973     |
| 14 14 3  | 10.72196    | 8 8 1 1 | -3.62479    | 18 17 14 14 | -60.59653   | 23 19 19 19 | 4.81813     |
| 14 14 4  | -3.93441    | 8 8 2 1 | 0.41740     | 18 17 15 15 | 88.44129    | 23 20 1 1   | -38.76869   |
| 14 14 5  | 20.07284    | 8 8 2 2 | -3.00096    | 18 17 16 16 | -19.95369   | 23 20 2 2   | -3.84099    |
| 14 14 7  | 4.97482     | 8 8 3 1 | 0.48332     | 18 17 17 17 | -100.77151  | 23 20 3 3   | 5.04197     |
| 14 14 8  | -12.24791   | 8 8 3 2 | -0.19243    | 18 18 1 1   | 187.56405   | 23 20 4 4   | 1.54805     |
| 14 14 9  | -9.78402    | 8 8 3 3 | 6.26922     | 18 18 2 1   | 61.73210    | 23 20 5 5   | 7.29467     |
| 15 14 1  | -191.59180  | 8 8 4 1 | -1.06661    | 18 18 2 2   | 366.26781   | 23 20 6 6   | -2.76515    |
| 15 14 2  | 371.37910   | 8 8 4 2 | -0.43465    | 18 18 3 1   | 3.42550     | 23 20 7 7   | 3.04733     |
| 15 14 3  | 5.98436     | 8 8 4 3 | -10.38864   | 18 18 3 2   | -2.34284    | 23 20 8 8   | 0.96180     |
| 15 14 4  | -4.35786    | 8 8 4 4 | 18.48727    | 18 18 3 3   | -25.35406   | 23 20 9 9   | 4.60534     |
| 15 14 5  | -16.99742   | 8 8 5 1 | 1.12800     | 18 18 4 1   | 6.08102     | 23 20 10 10 | 7.03131     |
| 15 14 6  | -11.50214   | 8 8 5 3 | 3.42119     | 18 18 4 2   | 5.35282     | 23 20 11 11 | 3.48555     |
| 15 14 7  | 6.55542     | 8 8 5 4 | -6.14901    | 18 18 4 3   | -24.68125   | 23 20 12 12 | 1.46551     |
| 15 14 8  | 6.20507     | 8 8 5 5 | 6.27230     | 18 18 4 4   | -104.39738  | 23 20 13 13 | 1.57871     |
| 15 14 9  | -3.65539    | 8 8 6 1 | 0.30427     | 18 18 5 1   | 0.22860     | 23 20 14 14 | 3.78400     |
| 15 15 1  | 602.70971   | 8 8 6 2 | 0.75707     | 18 18 5 2   | 2.11426     | 23 20 15 15 | 10.84889    |
| 15 15 2  | 69.64929    | 8 8 6 3 | -6.18803    | 18 18 5 3   | 13.77604    | 23 20 16 16 | 3.86077     |
| 15 15 3  | 6.40996     | 8 8 6 4 | 9.35258     | 18 18 5 4   | -49.74528   | 23 20 17 17 | -30.21670   |
| 15 15 5  | -0.90312    | 8 8 6 5 | 3.47992     | 18 18 5 5   | -62.93292   | 23 20 18 18 | -13.08072   |
| 15 15 6  | -6.19463    | 8 8 6 6 | 28.28244    | 18 18 6 1   | -1.20540    | 23 20 19 19 | -2.55722    |
| 15 15 7  | -14.28318   | 8 8 7 1 | 0.36404     | 18 18 6 2   | -6.66878    | 23 20 20 17 | -3.34319    |
| 15 15 8  | 5.25863     | 8 8 7 2 | -0.09008    | 18 18 6 3   | -20.36459   | 23 20 20 18 | 2.30276     |
| 15 15 9  | -2.01345    | 8 8 7 3 | 11.07453    | 18 18 6 4   | 1.64018     | 23 20 20 19 | -5.42860    |
| 16 14 1  | 146.98362   | 8 8 7 4 | -16.62113   | 18 18 6 5   | 30.44616    | 23 20 20 20 | 6.81464     |
| 16 14 2  | 178.04300   | 8 8 7 5 | 3.76501     | 18 18 6 6   | -26.21637   | 23 21 1 1   | -0.95325    |
| 16 14 3  | 23.51696    | 8 8 7 6 | -17.55424   | 18 18 7 1   | -2.41153    | 23 21 2 2   | 1.44974     |
| 16 14 4  | -2.95051    | 8 8 7 7 | 19.99717    | 18 18 7 2   | 1.36375     | 23 21 3 3   | -2.04622    |
| 16 14 5  | 12.09524    | 8 8 8 1 | -1.17516    | 18 18 7 3   | -25.27722   | 23 21 4 4   | 1.83962     |
| 16 14 6  | 16.89556    | 8 8 8 2 | -0.79475    | 18 18 7 4   | -70.10457   | 23 21 5 5   | 0.49071     |
| 16 14 7  | 4.10901     | 8 8 8 3 | 8.70266     | 18 18 7 5   | -21.46328   | 23 21 6 6   | -10.17982   |
| 16 14 8  | -18.44761   | 8 8 8 4 | -14.85469   | 18 18 7 6   | -8.57060    | 23 21 7 7   | 0.28924     |
| 16 14 9  | 2.37264     | 8 8 8 5 | -1.07946    | 18 18 7 7   | -51.20814   | 23 21 8 8   | 2.78852     |
| 16 15 1  | -99.89358   | 8 8 8 6 | -29.48661   | 18 18 8 1   | 5.40717     | 23 21 9 9   | 1.21392     |
| 16 15 2  | 212.82935   | 8 8 8 7 | 20.96660    | 18 18 8 2   | 6.92936     | 23 21 10 10 | -0.58965    |
| 16 15 3  | -41.39767   | 8 8 8 8 | 39.59767    | 18 18 8 3   | -7.33432    | 23 21 11 11 | -0.84543    |
| 16 15 4  | 13.54259    | 9 1 1 1 | 0.41674     | 18 18 8 4   | -14.31756   | 23 21 12 12 | 1.22217     |
| 16 15 5  | 8.67337     | 9 2 1 1 | -0.24937    | 18 18 8 5   | -0.33167    | 23 21 13 13 | -0.58539    |
| 16 15 6  | -33.94083   | 9 2 2 1 | 0.50382     | 18 18 8 6   | -5.11105    | 23 21 14 14 | -0.61971    |
| 16 15 7  | -7.18737    | 9 2 2 2 | 0.94443     | 18 18 8 7   | -11.42608   | 23 21 16 16 | 3.76789     |
| 16 15 8  | 0.82322     | 9 3 1 1 | -34.45449   | 18 18 8 8   | -3.29917    | 23 21 17 17 | -0.29042    |
| 16 15 9  | 14.89823    | 9 3 2 2 | -0.11364    | 18 18 9 1   | 0.49988     | 23 21 18 18 | 0.75039     |
| 16 16 1  | 76.96364    | 9 3 3 1 | -0.72501    | 18 18 9 2   | 0.79691     | 23 21 19 19 | -4.01636    |
| 16 16 2  | 101.74963   | 9 3 3 2 | 1.63043     | 18 18 9 3   | -9.35139    | 23 21 20 20 | -4.24684    |
| 16 16 3  | -51.82599   | 9 3 3 3 | 14.28058    | 18 18 9 4   | 10.07495    | 23 21 21 17 | 1.46638     |
| 16 16 4  | 40.52349    | 9 4 1 1 | -0.74273    | 18 18 9 5   | 22.52596    | 23 21 21 18 | 1.87336     |
| 16 16 5  | -5.77609    | 9 4 2 2 | 13.89314    | 18 18 9 6   | -14.31293   | 23 21 21 19 | -4.33799    |
| 16 16 6  | 42.31404    | 9 4 3 3 | -3.43918    | 18 18 9 7   | 1.48514     | 23 21 21 20 | -3.37428    |
| 16 16 7  | -18.93749   | 9 4 4 1 | 0.68749     | 18 18 9 8   | -1.59323    | 23 21 21 21 | -3.36021    |
| 16 16 8  | 69.86875    | 9 4 4 2 | 2.85959     | 18 18 9 9   | -9.45096    | 23 22 1 1   | 30.54972    |
| 16 16 9  | -16.77597   | 9 4 4 3 | 0.55882     | 18 18 10 10 | -142.49053  | 23 22 2 2   | 2.45584     |
| 17 14 10 | -317.67714  | 9 4 4 4 | -7.22654    | 18 18 11 10 | 63.93343    | 23 22 3 3   | -6.10818    |
| 17 14 11 | 75.74188    | 9 5 1 1 | 50.41829    | 18 18 11 11 | -225.19472  | 23 22 4 4   | -2.37736    |
| 17 14 12 | -56.08284   | 9 5 2 2 | 12.27083    | 18 18 12 10 | -26.09859   | 23 22 5 5   | -12.59149   |
| 17 14 13 | -139.60262  | 9 5 3 3 | -4.21207    | 18 18 12 11 | 26.34799    | 23 22 6 6   | -16.12839   |
| 17 15 10 | 268.48650   | 9 5 4 4 | -0.63297    | 18 18 12 12 | -6.00712    | 23 22 7 7   | 1.30791     |
| 17 15 11 | 431.67116   | 9 5 5 1 | -1.23725    | 18 18 13 10 | -53.79718   | 23 22 8 8   | -2.17732    |
| 17 15 12 | 8.15621     | 9 5 5 2 | 1.84591     | 18 18 13 11 | 9.98775     | 23 22 9 9   | -2.50951    |
| 17 15 13 | 148.94818   | 9 5 5 3 | 13.08624    | 18 18 13 12 | -8.57490    | 23 22 10 10 | -5.48089    |
| 17 16 10 | -184.00321  | 9 5 5 4 | -3.26331    | 18 18 13 13 | -20.06192   | 23 22 11 11 | -3.84182    |
| 17 16 11 | 52.49114    | 9 5 5 5 | -20.29501   | 18 18 14 14 | -198.99700  | 23 22 12 12 | 1.83684     |
| 17 16 12 | -24.16997   | 9 6 1 1 | -40.90610   | 18 18 15 14 | -75.47445   | 23 22 13 13 | -2.30377    |
| 17 16 13 | -73.31072   | 9 6 2 2 | 4.47690     | 18 18 15 15 | -213.41799  | 23 22 14 14 | -2.54970    |
| 17 17 1  | -1046.14141 | 9 6 3 3 | 7.29415     | 18 18 16 14 | -106.83989  | 23 22 15 15 | -11.03351   |
| 17 17 2  | -106.77394  | 9 6 4 4 | 2.40617     | 18 18 16 15 | -43.38373   | 23 22 16 16 | 3.07885     |
| 17 17 3  | -11.53954   | 9 6 5 5 | 17.92409    | 18 18 16 16 | -55.77814   | 23 22 17 17 | 23.35615    |
| 17 17 4  | -28.72832   | 9 6 6 1 | -0.60842    | 18 18 17 17 | 234.37663   | 23 22 18 18 | 10.06160    |
| 17 17 5  | 2.67689     | 9 6 6 2 | 1.93450     | 18 18 18 17 | 98.94611    | 23 22 19 19 | -12.30570   |
| 17 17 6  | 8.53661     | 9 6 6 3 | 12.80934    | 18 18 18 18 | 321.50870   | 23 22 20 20 | -11.91754   |
| 17 17 7  | 19.39408    | 9 6 6 4 | -2.58493    | 19 17 1 1   | -6.70229    | 23 22 21 21 | -3.45027    |
| 17 17 8  | -24.74586   | 9 6 6 5 | -12.12547   | 19 17 2 2   | -8.24661    | 23 22 22 17 | -0.13697    |
| 17 17 9  | -2.24918    | 9 6 6 6 | 5.82982     | 19 17 3 3   | -1.30766    | 23 22 22 18 | 1.61603     |
| 18 14 10 | -54.38481   | 9 7 1 1 | -16.66442   | 19 17 4 4   | 3.07795     | 23 22 22 20 | 4.44154     |

| I J K    | F(I,J,K)   | I J K L   | F(I,J,,K,L) | I J K L     | F(I,J,K,L) | I J K L     | F(I,J,K,L) |
|----------|------------|-----------|-------------|-------------|------------|-------------|------------|
| 18 14 11 | 408.80721  | 9 7 2 2   | 7.89373     | 19 17 5 5   | -1.37324   | 23 22 22 21 | 0.65756    |
| 18 14 12 | -39.75690  | 9 7 3 3   | 0.80490     | 19 17 6 6   | -1.49555   | 23 22 22 22 | -11.05295  |
| 18 14 13 | 4.60026    | 9 7 4 4   | -3.93037    | 19 17 7 7   | 0.79070    | 23 23 1 1   | -13.58861  |
| 18 15 10 | -401.58034 | 9 7 5 5   | 5.65126     | 19 17 8 8   | 1.25233    | 23 23 2 1   | 3.65264    |
| 18 15 11 | 99.51070   | 9 7 6 6   | 9.65444     | 19 17 9 9   | -0.87196   | 23 23 2 2   | -3.07910   |
| 18 15 12 | -64.90891  | 9 7 7 1   | 0.51586     | 19 17 10 10 | -1.13623   | 23 23 3 1   | 2.63760    |
| 18 15 13 | -169.16642 | 9 7 7 2   | 1.68015     | 19 17 11 11 | 3.28329    | 23 23 3 2   | -0.76612   |
| 18 16 10 | -41.76866  | 9 7 7 3   | 4.56553     | 19 17 12 12 | -0.16680   | 23 23 3 3   | -5.01111   |
| 18 16 11 | 235.30383  | 9 7 7 4   | -1.53808    | 19 17 13 13 | 1.20678    | 23 23 4 1   | 0.49312    |
| 18 16 12 | -20.60055  | 9 7 7 5   | -5.18575    | 19 17 14 14 | 1.28108    | 23 23 4 2   | -0.69786   |
| 18 16 13 | 1.82230    | 9 7 7 6   | 0.88783     | 19 17 15 15 | 3.76720    | 23 23 4 3   | 0.74442    |
| 18 17 1  | 419.20504  | 9 7 7 7   | -3.24378    | 19 17 16 16 | -0.61378   | 23 23 4 4   | -5.83898   |
| 18 17 2  | -803.44811 | 9 8 1 1   | -8.40303    | 19 17 17 17 | -8.70117   | 23 23 5 1   | -2.39875   |
| 18 17 3  | 6.51236    | 9 8 2 2   | 0.93985     | 19 18 1 1   | 1.54002    | 23 23 5 2   | 1.13911    |
| 18 17 4  | 3.22631    | 9 8 3 3   | -1.02819    | 19 18 2 2   | -10.99213  | 23 23 5 3   | -3.59403   |
| 18 17 5  | -0.23432   | 9 8 4 4   | -0.64709    | 19 18 3 3   | 1.32489    | 23 23 5 4   | 1.45459    |
| 18 17 6  | 15.88025   | 9 8 5 5   | 2.94457     | 19 18 4 4   | 4.17165    | 23 23 5 5   | 2.20241    |
| 18 17 7  | -12.91274  | 9 8 6 6   | 2.19354     | 19 18 5 5   | 1.78278    | 23 23 6 1   | 1.70990    |
| 18 17 8  | -3.58009   | 9 8 7 7   | 1.35514     | 19 18 6 6   | -0.15960   | 23 23 6 3   | 1.89957    |
| 18 17 9  | 1.78091    | 9 8 8 1   | -0.22985    | 19 18 7 7   | 3.13422    | 23 23 6 4   | 0.22420    |
| 18 18 1  | -696.34289 | 9 8 8 2   | 0.60111     | 19 18 8 8   | 0.54459    | 23 23 6 5   | -2.62879   |
| 18 18 2  | -795.32805 | 9 8 8 3   | 3.04992     | 19 18 9 9   | 0.79833    | 23 23 6 6   | -1.40180   |
| 18 18 3  | -9.11466   | 9 8 8 4   | -3.62852    | 19 18 10 10 | 2.06673    | 23 23 7 2   | 0.32284    |
| 18 18 4  | -23.57717  | 9 8 8 5   | 2.06293     | 19 18 11 11 | 5.84725    | 23 23 7 3   | 3.84395    |
| 18 18 5  | -1.55902   | 9 8 8 6   | 2.03656     | 19 18 12 12 | 0.47758    | 23 23 7 4   | 3.65479    |
| 18 18 6  | 20.06854   | 9 8 8 7   | 1.48494     | 19 18 13 13 | -2.88100   | 23 23 7 5   | -0.68773   |
| 18 18 7  | 6.61273    | 9 8 8 8   | -0.59208    | 19 18 14 14 | 4.03094    | 23 23 7 6   | 2.23515    |
| 18 18 8  | -24.92761  | 9 9 1 1   | -24.18943   | 19 18 15 15 | 1.98996    | 23 23 7 7   | -5.73784   |
| 18 18 9  | -1.08458   | 9 9 2 1   | 7.01742     | 19 18 16 16 | 1.98282    | 23 23 8 1   | 0.96726    |
| 19 14 10 | -7.29878   | 9 9 2 2   | -3.99264    | 19 18 17 17 | -0.94152   | 23 23 8 2   | 0.27461    |
| 19 14 11 | -5.01791   | 9 9 3 1   | -1.21769    | 19 18 18 17 | -7.82133   | 23 23 8 3   | -3.65762   |
| 19 14 13 | -33.34681  | 9 9 3 2   | 0.72770     | 19 18 18 18 | -7.77397   | 23 23 8 4   | 5.13543    |
| 19 15 10 | 9.51670    | 9 9 3 3   | 4.15985     | 19 19 1 1   | -29.43693  | 23 23 8 5   | -1.82478   |
| 19 15 11 | -2.63162   | 9 9 4 1   | -0.34475    | 19 19 2 1   | -7.06880   | 23 23 8 6   | 4.80045    |
| 19 15 12 | 7.80513    | 9 9 4 2   | -0.54813    | 19 19 2 2   | -51.71061  | 23 23 8 7   | -4.61895   |
| 19 15 13 | -44.90592  | 9 9 4 3   | -0.54782    | 19 19 3 1   | 2.41928    | 23 23 8 8   | -3.83429   |
| 19 16 10 | -22.19623  | 9 9 4 4   | -2.43593    | 19 19 3 2   | -1.36702   | 23 23 9 1   | -0.45525   |
| 19 16 11 | -12.67596  | 9 9 5 1   | 0.30873     | 19 19 3 3   | 4.88462    | 23 23 9 2   | -0.42841   |
| 19 16 12 | 8.53326    | 9 9 5 2   | -0.32503    | 19 19 4 1   | -3.17333   | 23 23 9 3   | -1.03141   |
| 19 16 13 | 55.72419   | 9 9 5 3   | -5.15608    | 19 19 4 2   | -5.39613   | 23 23 9 5   | -1.04406   |
| 19 17 1  | 17.68529   | 9 9 5 4   | 1.58284     | 19 19 4 3   | -4.86900   | 23 23 9 6   | 1.47439    |
| 19 17 2  | 21.22448   | 9 9 5 5   | 8.50721     | 19 19 4 4   | 17.88800   | 23 23 9 7   | 1.35790    |
| 19 17 3  | 47.67689   | 9 9 6 1   | -0.82953    | 19 19 5 1   | 2.53742    | 23 23 9 8   | 1.84962    |
| 19 17 4  | -71.59610  | 9 9 6 2   | 0.16815     | 19 19 5 2   | -1.86163   | 23 23 9 9   | -2.35492   |
| 19 17 5  | -75.83172  | 9 9 6 3   | 7.35498     | 19 19 5 3   | 1.16832    | 23 23 10 10 | 1.02376    |
| 19 17 6  | 63.93299   | 9 9 6 4   | 2.95769     | 19 19 5 4   | -1.97081   | 23 23 11 10 | 1.06465    |
| 19 17 7  | -20.04658  | 9 9 6 5   | -11.74692   | 19 19 5 5   | 17.08524   | 23 23 11 11 | -0.89257   |
| 19 17 8  | -7.60326   | 9 9 6 6   | -0.97051    | 19 19 6 1   | 0.27433    | 23 23 12 12 | -3.21103   |
| 19 17 9  | 42.39661   | 9 9 7 2   | -0.30069    | 19 19 6 2   | 2.35766    | 23 23 13 10 | 1.70227    |
| 19 18 1  | 6.20086    | 9 9 7 3   | 0.78905     | 19 19 6 3   | 1.98651    | 23 23 13 11 | 0.28776    |
| 19 18 2  | 34.21872   | 9 9 7 4   | 1.33837     | 19 19 6 4   | -9.46212   | 23 23 13 12 | -0.63796   |
| 19 18 3  | -57.80051  | 9 9 7 5   | -3.65505    | 19 19 6 5   | 10.86967   | 23 23 13 13 | -4.23801   |
| 19 18 4  | -99.59197  | 9 9 7 6   | 2.89576     | 19 19 6 6   | 28.89538   | 23 23 14 14 | -1.87869   |
| 19 18 5  | -1.35550   | 9 9 7 7   | 1.92258     | 19 19 7 1   | -2.02229   | 23 23 15 14 | -2.43575   |
| 19 18 6  | -19.30454  | 9 9 8 1   | -0.13864    | 19 19 7 2   | -1.82745   | 23 23 15 15 | -2.06856   |
| 19 18 7  | -69.61756  | 9 9 8 2   | -0.11684    | 19 19 7 3   | 12.54842   | 23 23 16 14 | -0.70261   |
| 19 18 8  | -23.22792  | 9 9 8 3   | 1.94831     | 19 19 7 4   | 7.22335    | 23 23 16 15 | 0.26200    |
| 19 18 9  | -4.77876   | 9 9 8 4   | -0.76693    | 19 19 7 5   | 4.42541    | 23 23 16 16 | -9.60667   |
| 19 19 1  | 59.25549   | 9 9 8 5   | -1.23282    | 19 19 7 6   | -0.53510   | 23 23 17 17 | -10.67029  |
| 19 19 2  | 70.55331   | 9 9 8 6   | 1.64561     | 19 19 7 7   | 6.14936    | 23 23 18 17 | 5.70136    |
| 19 19 3  | 114.75721  | 9 9 8 7   | 1.00985     | 19 19 8 1   | -2.33477   | 23 23 18 18 | -5.74654   |
| 19 19 4  | -80.15119  | 9 9 8 8   | 0.37184     | 19 19 8 2   | -2.22653   | 23 23 19 17 | 0.39189    |
| 19 19 5  | 33.29200   | 9 9 9 1   | -0.53914    | 19 19 8 3   | -11.11737  | 23 23 19 18 | 0.51665    |
| 19 19 6  | -16.11959  | 9 9 9 2   | -0.31366    | 19 19 8 4   | 14.36077   | 23 23 19 19 | -4.60463   |
| 19 19 7  | 85.42772   | 9 9 9 3   | 2.84580     | 19 19 8 5   | -7.93391   | 23 23 20 17 | -2.37159   |
| 19 19 8  | -128.34186 | 9 9 9 4   | 1.40141     | 19 19 8 6   | -3.10300   | 23 23 20 18 | 1.85114    |
| 19 19 9  | 22.25665   | 9 9 9 5   | -5.50222    | 19 19 8 7   | -7.07185   | 23 23 20 19 | -3.04188   |
| 20 14 10 | -2.22376   | 9 9 9 6   | 3.33158     | 19 19 8 8   | 12.47587   | 23 23 20 20 | 3.42542    |
| 20 14 11 | -2.92838   | 9 9 9 7   | 0.70251     | 19 19 9 1   | -0.77129   | 23 23 21 17 | -0.11999   |
| 20 14 12 | 10.07895   | 9 9 9 8   | 3.08355     | 19 19 9 2   | 1.87280    | 23 23 21 18 | 0.36742    |
| 20 14 13 | -23.20933  | 9 9 9 9   | 5.04654     | 19 19 9 3   | 6.62602    | 23 23 21 19 | 0.08434    |
| 20 15 10 | 3.90313    | 10 10 1 1 | -229.35808  | 19 19 9 4   | -5.22696   | 23 23 21 20 | 1.67457    |
| 20 15 11 | -2.22058   | 10 10 2 1 | 42.93976    | 19 19 9 5   | -1.25891   | 23 23 21 21 | 1.91719    |
| 20 15 12 | -0.56640   | 10 10 2 2 | -110.58991  | 19 19 9 6   | 3.78369    | 23 23 22 17 | 1.43334    |
| 20 16 10 | 22.52088   | 10 10 3 1 | 1.01584     | 19 19 9 7   | 0.35502    | 23 23 22 18 | -1.08515   |
| 20 16 11 | 10.29543   | 10 10 3 2 | -2.62411    | 19 19 9 8   | -1.16303   | 23 23 22 19 | 1.33996    |
| 20 16 12 | -29.66063  | 10 10 3 3 | 5.26922     | 19 19 9 9   | -7.47472   | 23 23 22 20 | 0.15413    |
| 20 16 13 | 4.33919    | 10 10 4 1 | -2.69629    | 19 19 10 10 | 3.28911    | 23 23 22 21 | 1.96313    |
| 20 17 1  | -11.27129  | 10 10 4 2 | 0.55794     | 19 19 11 10 | -3.08297   | 23 23 22 22 | 5.46633    |
| 20 17 2  | 0.16018    | 10 10 4 3 | 1.01678     | 19 19 11 11 | 7.94181    | 23 23 23 17 | -2.04012   |
| 20 17 3  | -109.26681 | 10 10 4 4 | 7.08520     | 19 19 12 10 | 5.22430    | 23 23 23 18 | 0.59591    |
| 20 17 4  | -44.98799  | 10 10 5 1 | -0.26266    | 19 19 12 11 | -4.02137   | 23 23 23 19 | 1.23038    |
| 20 17 5  | 99.94924   | 10 10 5 2 | -1.55759    | 19 19 12 12 | -12.59169  | 23 23 23 20 | 1.55124    |
| 20 17 6  | -109.55075 | 10 10 5 3 | -11.22533   | 19 19 13 10 | 5.54079    | 23 23 23 21 | -0.67982   |
| 20 17 7  | -76.86460  | 10 10 5 4 | 4.11681     | 19 19 13 11 | -1.40647   | 23 23 23 22 | -3.59091   |
| 20 17 8  | -26.43800  | 10 10 5 5 | 15.62741    | 19 19 13 12 | -3.46872   | 23 23 23 23 | -3.03922   |
| 20 17 9  | -71.98628  | 10 10 6 1 | -0.19591    | 19 19 13 13 | -13.69003  | 24 17 1 1   | -0.43023   |
| 20 18 1  | 5.01272    | 10 10 6 2 | 1.91874     | 19 19 14 14 | 4.51415    | 24 17 2 2   | -0.79003   |
| 20 18 2  | -6.23241   | 10 10 6 3 | 14.22533    | 19 19 15 14 | 4.03380    | 24 17 3 3   | 1.96846    |

| I  | J  | K  | F(I,J,K)   | I  | J  | K  | L  | F(I,J,,K,L) | I  | J  | K  | L  | F(I,J,K,L) | I  | J  | K  | L  | F(I,J,K,L) |
|----|----|----|------------|----|----|----|----|-------------|----|----|----|----|------------|----|----|----|----|------------|
| 20 | 18 | 3  | 55.92886   | 10 | 10 | 6  | 4  | -0.76450    | 19 | 19 | 15 | 15 | 7.20141    | 24 | 17 | 4  | 4  | 0.71035    |
| 20 | 18 | 4  | -75.78603  | 10 | 10 | 6  | 5  | -14.49329   | 19 | 19 | 16 | 14 | 13.98735   | 24 | 17 | 5  | 5  | 2.57269    |
| 20 | 18 | 5  | -114.90160 | 10 | 10 | 6  | 6  | 13.50379    | 19 | 19 | 16 | 15 | 3.17975    | 24 | 17 | 6  | 6  | 1.23681    |
| 20 | 18 | 6  | 80.77590   | 10 | 10 | 7  | 1  | -0.18133    | 19 | 19 | 16 | 16 | -23.25691  | 24 | 17 | 7  | 7  | 1.66222    |
| 20 | 18 | 7  | -21.90680  | 10 | 10 | 7  | 2  | -1.26904    | 19 | 19 | 17 | 17 | -35.08162  | 24 | 17 | 8  | 8  | -0.22290   |
| 20 | 18 | 8  | 1.82401    | 10 | 10 | 7  | 3  | 6.46535     | 19 | 19 | 18 | 17 | -12.10531  | 24 | 17 | 10 | 10 | 1.44115    |
| 20 | 18 | 9  | 54.97199   | 10 | 10 | 7  | 4  | 7.89635     | 19 | 19 | 18 | 18 | -46.10340  | 24 | 17 | 11 | 11 | -0.15641   |
| 20 | 19 | 1  | -57.21761  | 10 | 10 | 7  | 5  | -2.69460    | 19 | 19 | 19 | 17 | 3.10999    | 24 | 17 | 12 | 12 | -0.48792   |
| 20 | 19 | 2  | 75.89891   | 10 | 10 | 7  | 6  | 4.37499     | 19 | 19 | 19 | 18 | 5.16867    | 24 | 17 | 13 | 13 | -0.40739   |
| 20 | 19 | 3  | 16.59500   | 10 | 10 | 7  | 7  | 3.86105     | 19 | 19 | 19 | 19 | 27.15488   | 24 | 17 | 14 | 14 | 1.09021    |
| 20 | 19 | 4  | 43.12804   | 10 | 10 | 8  | 1  | -0.86136    | 20 | 17 | 1  | 1  | 3.72555    | 24 | 17 | 15 | 15 | 0.57387    |
| 20 | 19 | 5  | -30.95463  | 10 | 10 | 8  | 3  | 1.09921     | 20 | 17 | 2  | 2  | 1.53897    | 24 | 17 | 16 | 16 | 0.59095    |
| 20 | 19 | 6  | -117.26260 | 10 | 10 | 8  | 4  | 1.75011     | 20 | 17 | 3  | 3  | 1.96113    | 24 | 17 | 17 | 17 | -1.13473   |
| 20 | 19 | 7  | -5.18446   | 10 | 10 | 8  | 5  | -2.11446    | 20 | 17 | 4  | 4  | 0.34200    | 24 | 18 | 1  | 1  | -0.46735   |
| 20 | 19 | 8  | -1.36679   | 10 | 10 | 8  | 6  | 2.33293     | 20 | 17 | 5  | 5  | -0.99379   | 24 | 18 | 2  | 2  | -1.02340   |
| 20 | 19 | 9  | -17.40555  | 10 | 10 | 8  | 7  | 3.10868     | 20 | 17 | 6  | 6  | 0.21588    | 24 | 18 | 3  | 3  | -0.95096   |
| 20 | 20 | 1  | 160.99761  | 10 | 10 | 8  | 8  | -0.35480    | 20 | 17 | 7  | 7  | 1.53245    | 24 | 18 | 4  | 4  | -0.19098   |
| 20 | 20 | 2  | -9.96915   | 10 | 10 | 9  | 1  | -0.94831    | 20 | 17 | 9  | 9  | 1.20177    | 24 | 18 | 5  | 5  | -2.36863   |
| 20 | 20 | 3  | 28.55144   | 10 | 10 | 9  | 2  | 1.12207     | 20 | 17 | 10 | 10 | -0.92982   | 24 | 18 | 6  | 6  | -0.87851   |
| 20 | 20 | 4  | 14.62230   | 10 | 10 | 9  | 3  | 7.43069     | 20 | 17 | 11 | 11 | 0.52408    | 24 | 18 | 7  | 7  | -1.00451   |
| 20 | 20 | 5  | -17.10596  | 10 | 10 | 9  | 4  | -0.68641    | 20 | 17 | 12 | 12 | 0.21176    | 24 | 18 | 8  | 8  | -0.31650   |
| 20 | 20 | 6  | -60.08877  | 10 | 10 | 9  | 5  | -9.74757    | 20 | 17 | 13 | 13 | -2.19633   | 24 | 18 | 9  | 9  | 0.35493    |
| 20 | 20 | 7  | 47.91693   | 10 | 10 | 9  | 6  | 9.26219     | 20 | 17 | 14 | 14 | -1.83577   | 24 | 18 | 10 | 10 | -0.93215   |
| 20 | 20 | 8  | -37.57282  | 10 | 10 | 9  | 7  | 2.29880     | 20 | 17 | 15 | 15 | -3.98396   | 24 | 18 | 11 | 11 | -0.79926   |
| 20 | 20 | 9  | 17.42220   | 10 | 10 | 9  | 8  | 1.37648     | 20 | 17 | 16 | 16 | 1.60978    | 24 | 18 | 12 | 12 | 0.21767    |
| 21 | 14 | 10 | -8.31321   | 10 | 10 | 9  | 9  | 3.87226     | 20 | 17 | 17 | 17 | 5.62888    | 24 | 18 | 13 | 13 | 0.51785    |
| 21 | 14 | 11 | -3.22579   | 10 | 10 | 10 | 10 | 377.69198   | 20 | 18 | 1  | 1  | -1.22979   | 24 | 18 | 14 | 14 | -0.67318   |
| 21 | 14 | 12 | -2.06443   | 11 | 10 | 1  | 1  | -134.20909  | 20 | 18 | 2  | 2  | 3.42982    | 24 | 18 | 15 | 15 | -1.54821   |
| 21 | 14 | 13 | 10.74976   | 11 | 10 | 2  | 2  | 133.77419   | 20 | 18 | 3  | 3  | 1.42306    | 24 | 18 | 16 | 16 | 0.25178    |
| 21 | 15 | 10 | 8.39458    | 11 | 10 | 3  | 3  | 6.72904     | 20 | 18 | 4  | 4  | 1.77276    | 24 | 18 | 17 | 17 | -0.25867   |
| 21 | 15 | 11 | -6.98055   | 11 | 10 | 4  | 4  | -15.17443   | 20 | 18 | 5  | 5  | 0.74563    | 24 | 18 | 18 | 17 | -0.61623   |
| 21 | 15 | 12 | -2.76111   | 11 | 10 | 5  | 5  | 7.82087     | 20 | 18 | 6  | 6  | -1.37418   | 24 | 18 | 18 | 18 | -0.88981   |
| 21 | 15 | 13 | 17.86920   | 11 | 10 | 6  | 6  | 10.47064    | 20 | 18 | 7  | 7  | 0.84360    | 24 | 19 | 1  | 1  | -15.29320  |
| 21 | 16 | 10 | -3.42137   | 11 | 10 | 7  | 7  | -6.77606    | 20 | 18 | 9  | 9  | -0.31807   | 24 | 19 | 2  | 2  | -31.27792  |
| 21 | 16 | 11 | 1.13883    | 11 | 10 | 9  | 9  | 3.77605     | 20 | 18 | 10 | 10 | 1.71453    | 24 | 19 | 3  | 3  | 6.64545    |
| 21 | 16 | 12 | -26.28990  | 11 | 10 | 10 | 10 | 62.77350    | 20 | 18 | 11 | 11 | -0.61969   | 24 | 19 | 4  | 4  | 15.82385   |
| 21 | 16 | 13 | 32.63371   | 11 | 11 | 1  | 1  | -125.20179  | 20 | 18 | 12 | 12 | 0.24876    | 24 | 19 | 5  | 5  | 10.21316   |
| 21 | 17 | 1  | -8.22288   | 11 | 11 | 2  | 1  | -46.95122   | 20 | 18 | 13 | 13 | 0.72780    | 24 | 19 | 6  | 6  | 10.01778   |
| 21 | 17 | 2  | -1.44431   | 11 | 11 | 2  | 2  | -259.48145  | 20 | 18 | 14 | 14 | 2.34464    | 24 | 19 | 7  | 7  | 9.06615    |
| 21 | 17 | 3  | 18.65120   | 11 | 11 | 3  | 1  | -0.77814    | 20 | 18 | 15 | 15 | 1.68714    | 24 | 19 | 8  | 8  | 3.58007    |
| 21 | 17 | 4  | 86.63314   | 11 | 11 | 3  | 2  | -3.40972    | 20 | 18 | 16 | 16 | -1.29290   | 24 | 19 | 9  | 9  | 2.22774    |
| 21 | 17 | 5  | 50.79537   | 11 | 11 | 3  | 3  | 1.42378     | 20 | 18 | 17 | 17 | -2.06789   | 24 | 19 | 10 | 10 | 5.57447    |
| 21 | 17 | 6  | -8.08977   | 11 | 11 | 4  | 1  | -3.28941    | 20 | 18 | 18 | 17 | 2.52209    | 24 | 19 | 11 | 11 | 10.23338   |
| 21 | 17 | 7  | 66.55590   | 11 | 11 | 4  | 2  | -0.75366    | 20 | 18 | 18 | 18 | 2.14073    | 24 | 19 | 12 | 12 | -2.15990   |
| 21 | 17 | 8  | 13.62793   | 11 | 11 | 4  | 3  | 4.99434     | 20 | 19 | 1  | 1  | 49.37341   | 24 | 19 | 13 | 13 | -1.21923   |
| 21 | 17 | 9  | -17.00172  | 11 | 11 | 4  | 4  | 23.83290    | 20 | 19 | 2  | 2  | -34.60137  | 24 | 19 | 14 | 14 | 8.49069    |
| 21 | 18 | 1  | 3.61099    | 11 | 11 | 5  | 1  | 3.92981     | 20 | 19 | 3  | 3  | 0.88807    | 24 | 19 | 15 | 15 | 11.78209   |
| 21 | 18 | 2  | -8.96163   | 11 | 11 | 5  | 2  | 0.10507     | 20 | 19 | 4  | 4  | 4.72619    | 24 | 19 | 16 | 16 | 1.37751    |
| 21 | 18 | 3  | 29.87648   | 11 | 11 | 5  | 3  | -3.41032    | 20 | 19 | 5  | 5  | -8.76498   | 24 | 19 | 17 | 17 | -19.80394  |
| 21 | 18 | 4  | 131.18594  | 11 | 11 | 5  | 4  | 13.79911    | 20 | 19 | 6  | 6  | 7.67165    | 24 | 19 | 18 | 18 | -27.47135  |
| 21 | 18 | 5  | 68.28238   | 11 | 11 | 5  | 5  | 14.36126    | 20 | 19 | 7  | 7  | 3.10221    | 24 | 19 | 19 | 17 | 1.78864    |
| 21 | 18 | 6  | -8.22182   | 11 | 11 | 6  | 1  | 2.01266     | 20 | 19 | 8  | 8  | -2.52676   | 24 | 19 | 19 | 18 | 0.66226    |
| 21 | 18 | 7  | 102.34282  | 11 | 11 | 6  | 2  | 7.26980     | 20 | 19 | 9  | 9  | -5.72032   | 24 | 19 | 19 | 19 | 14.23913   |
| 21 | 18 | 8  | 22.43567   | 11 | 11 | 6  | 3  | 6.78733     | 20 | 19 | 10 | 10 | 5.08091    | 24 | 20 | 1  | 1  | 27.70047   |
| 21 | 18 | 9  | -19.29008  | 11 | 11 | 6  | 4  | -2.92417    | 20 | 19 | 11 | 11 | 3.46077    | 24 | 20 | 2  | 2  | -21.92881  |
| 21 | 19 | 1  | -30.30635  | 11 | 11 | 6  | 5  | -10.77305   | 20 | 19 | 12 | 12 | -2.97511   | 24 | 20 | 3  | 3  | -6.43183   |
| 21 | 19 | 2  | -91.45970  | 11 | 11 | 6  | 6  | 2.30079     | 20 | 19 | 13 | 13 | -1.77895   | 24 | 20 | 4  | 4  | 11.09363   |
| 21 | 19 | 3  | 43.66265   | 11 | 11 | 7  | 1  | -1.25893    | 20 | 19 | 14 | 14 | 2.08708    | 24 | 20 | 5  | 5  | -5.67318   |
| 21 | 19 | 4  | 9.65303    | 11 | 11 | 7  | 2  | -1.13704    | 20 | 19 | 15 | 15 | -9.28934   | 24 | 20 | 6  | 6  | -3.99763   |
| 21 | 19 | 5  | -26.45362  | 11 | 11 | 7  | 3  | 4.58568     | 20 | 19 | 16 | 16 | -3.28999   | 24 | 20 | 7  | 7  | 2.14128    |
| 21 | 19 | 6  | -81.64778  | 11 | 11 | 7  | 4  | 20.36071    | 20 | 19 | 17 | 17 | 27.58437   | 24 | 20 | 8  | 8  | 2.64425    |
| 21 | 19 | 7  | 22.76471   | 11 | 11 | 7  | 5  | 7.51840     | 20 | 19 | 18 | 18 | -12.68396  | 24 | 20 | 9  | 9  | -2.83786   |
| 21 | 19 | 8  | -33.68426  | 11 | 11 | 7  | 6  | 1.28875     | 20 | 19 | 19 | 17 | 0.84266    | 24 | 20 | 10 | 10 | -3.78016   |
| 21 | 19 | 9  | 9.40408    | 11 | 11 | 7  | 7  | 13.55186    | 20 | 19 | 19 | 18 | 1.09248    | 24 | 20 | 11 | 11 | 3.52688    |
| 21 | 20 | 1  | -21.88330  | 11 | 11 | 8  | 1  | -3.06537    | 20 | 19 | 19 | 19 | -1.69177   | 24 | 20 | 12 | 12 | -0.59390   |
| 21 | 20 | 2  | -77.54100  | 11 | 11 | 8  | 2  | -3.23197    | 20 | 20 | 1  | 1  | -127.21983 | 24 | 20 | 13 | 13 | -1.69984   |
| 21 | 20 | 3  | 13.11880   | 11 | 11 | 8  | 3  | 1.44560     | 20 | 20 | 2  | 1  | 28.74368   | 24 | 20 | 14 | 14 | 4.08959    |
| 21 | 20 | 4  | 12.28172   | 11 | 11 | 8  | 4  | 5.19018     | 20 | 20 | 2  | 2  | -46.33730  | 24 | 20 | 15 | 15 | 0.63267    |
| 21 | 20 | 5  | -36.36851  | 11 | 11 | 8  | 5  | 0.95258     | 20 | 20 | 3  | 1  | 1.74796    | 24 | 20 | 16 | 16 | 1.02688    |
| 21 | 20 | 6  | -88.34368  | 11 | 11 | 8  | 6  | 1.80692     | 20 | 20 | 3  | 2  | -2.84654   | 24 | 20 | 17 | 17 | 15.46181   |
| 21 | 20 | 7  | 3.75347    | 11 | 11 | 8  | 7  | 2.90571     | 20 | 20 | 3  | 3  | 11.08120   | 24 | 20 | 18 | 18 | -8.80312   |
| 21 | 20 | 8  | -15.60879  | 11 | 11 | 8  | 8  | -0.92970    | 20 | 20 | 4  | 1  | -1.68667   | 24 | 20 | 19 | 19 | 4.54687    |
| 21 | 20 | 9  | 15.12325   | 11 | 11 | 9  | 1  | -0.59160    | 20 | 20 | 4  | 2  | -1.14045   | 24 | 20 | 20 | 17 | 3.10574    |
| 21 | 21 | 1  | 46.21380   | 11 | 11 | 9  | 2  | 0.87962     | 20 | 20 | 4  | 3  | 4.72717    | 24 | 20 | 20 | 18 | -2.10784   |
| 21 | 21 | 2  | 146.45602  | 11 | 11 | 9  | 3  | 2.81816     | 20 | 20 | 4  | 4  | 8.17965    | 24 | 20 | 20 | 19 | 8.16531    |
| 21 | 21 | 3  | 52.33211   | 11 | 11 | 9  | 4  | -4.77937    | 20 | 20 | 5  | 1  | -0.97865   | 24 | 20 | 20 | 20 | -5.77669   |
| 21 | 21 | 4  | -29.47689  | 11 | 11 | 9  | 5  | -6.58582    | 20 | 20 | 5  | 2  | -2.30754   | 24 | 21 | 1  | 1  | 5.74741    |
| 21 | 21 | 5  | -63.49810  | 11 | 11 | 9  | 6  | 5.87364     | 20 | 20 | 5  | 3  | -22.09358  | 24 | 21 | 2  | 2  | 50.50709   |
| 21 | 21 | 6  | -122.80739 | 11 | 11 | 9  | 7  | -0.85703    | 20 | 20 | 5  | 4  | 3.27853</  |    |    |    |    |            |

| I  | J  | K  | F(I,J,K)   | I  | J  | K  | L  | F(I,J,,K,L) | I  | J  | K  | L  | F(I,J,K,L) | I  | J  | K  | L  | F(I,J,K,L) |
|----|----|----|------------|----|----|----|----|-------------|----|----|----|----|------------|----|----|----|----|------------|
| 22 | 15 | 13 | -28.83256  | 12 | 10 | 7  | 7  | 4.11804     | 20 | 20 | 7  | 4  | 7.83457    | 24 | 21 | 14 | 14 | -10.05812  |
| 22 | 16 | 10 | 4.24092    | 12 | 10 | 8  | 8  | 1.90151     | 20 | 20 | 7  | 5  | -6.23471   | 24 | 21 | 15 | 15 | -8.57679   |
| 22 | 16 | 11 | -2.49929   | 12 | 10 | 9  | 9  | 1.58533     | 20 | 20 | 7  | 6  | 6.91670    | 24 | 21 | 16 | 16 | -3.44376   |
| 22 | 16 | 12 | -31.52214  | 12 | 10 | 10 | 10 | -93.64566   | 20 | 20 | 7  | 7  | 6.21347    | 24 | 21 | 17 | 17 | 17.23057   |
| 22 | 16 | 13 | -15.41991  | 12 | 11 | 1  | 1  | -9.99926    | 20 | 20 | 8  | 2  | 0.59493    | 24 | 21 | 18 | 18 | 38.98626   |
| 22 | 17 | 1  | -11.80363  | 12 | 11 | 2  | 2  | 39.02930    | 20 | 20 | 8  | 3  | 2.47256    | 24 | 21 | 19 | 19 | -3.12661   |
| 22 | 17 | 2  | -0.42304   | 12 | 11 | 3  | 3  | 2.13293     | 20 | 20 | 8  | 4  | 0.98982    | 24 | 21 | 20 | 20 | -3.47513   |
| 22 | 17 | 3  | 69.41557   | 12 | 11 | 4  | 4  | -3.45578    | 20 | 20 | 8  | 5  | -1.68243   | 24 | 21 | 21 | 21 | -0.80400   |
| 22 | 17 | 4  | -23.42771  | 12 | 11 | 5  | 5  | -0.63580    | 20 | 20 | 8  | 6  | 8.90755    | 24 | 21 | 21 | 18 | -1.00902   |
| 22 | 17 | 5  | -132.58350 | 12 | 11 | 6  | 6  | -3.76795    | 20 | 20 | 8  | 8  | 0.83865    | 24 | 21 | 21 | 19 | 11.39301   |
| 22 | 17 | 6  | 89.90153   | 12 | 11 | 7  | 7  | 0.75651     | 20 | 20 | 9  | 1  | -0.68214   | 24 | 21 | 21 | 20 | 7.64876    |
| 22 | 17 | 7  | 12.68897   | 12 | 11 | 8  | 8  | 0.76261     | 20 | 20 | 9  | 2  | 1.75147    | 24 | 21 | 21 | 21 | -16.55685  |
| 22 | 17 | 8  | 22.72242   | 12 | 11 | 9  | 9  | 0.98566     | 20 | 20 | 9  | 3  | 13.62777   | 24 | 22 | 1  | 1  | -25.59918  |
| 22 | 17 | 9  | 60.87027   | 12 | 11 | 10 | 10 | 2.91150     | 20 | 20 | 9  | 4  | -3.70412   | 24 | 22 | 2  | 2  | -18.18627  |
| 22 | 18 | 1  | 3.77386    | 12 | 11 | 11 | 10 | 7.88479     | 20 | 20 | 9  | 5  | -15.02145  | 24 | 22 | 3  | 3  | 3.70118    |
| 22 | 18 | 2  | -3.73462   | 12 | 11 | 11 | 11 | -17.25214   | 20 | 20 | 9  | 6  | 12.30843   | 24 | 22 | 4  | 4  | 6.66504    |
| 22 | 18 | 3  | -54.11837  | 12 | 12 | 1  | 1  | -3.20871    | 20 | 20 | 9  | 7  | 6.76583    | 24 | 22 | 5  | 5  | 11.15207   |
| 22 | 18 | 4  | -47.52896  | 12 | 12 | 2  | 1  | -1.53602    | 20 | 20 | 9  | 8  | 1.18535    | 24 | 22 | 6  | 6  | 3.72536    |
| 22 | 18 | 5  | 47.00316   | 12 | 12 | 2  | 2  | -7.58925    | 20 | 20 | 9  | 9  | 6.02107    | 24 | 22 | 7  | 7  | 1.64236    |
| 22 | 18 | 6  | -61.84175  | 12 | 12 | 3  | 1  | 0.21501     | 20 | 20 | 10 | 10 | 19.38727   | 24 | 22 | 8  | 8  | 2.51769    |
| 22 | 18 | 7  | -58.17590  | 12 | 12 | 3  | 2  | -0.35216    | 20 | 20 | 11 | 10 | 9.72819    | 24 | 22 | 9  | 9  | 2.11912    |
| 22 | 18 | 8  | -20.72891  | 12 | 12 | 3  | 3  | -11.27155   | 20 | 20 | 11 | 11 | 14.03478   | 24 | 22 | 10 | 10 | 6.14220    |
| 22 | 18 | 9  | -41.45401  | 12 | 12 | 4  | 1  | 0.18540     | 20 | 20 | 12 | 10 | 3.51643    | 24 | 22 | 11 | 11 | 7.16947    |
| 22 | 19 | 1  | 55.04091   | 12 | 12 | 4  | 2  | -0.32148    | 20 | 20 | 12 | 11 | -0.96825   | 24 | 22 | 13 | 13 | 2.91554    |
| 22 | 19 | 2  | 10.21172   | 12 | 12 | 4  | 3  | 3.33894     | 20 | 20 | 12 | 12 | -5.48827   | 24 | 22 | 14 | 14 | 5.62026    |
| 22 | 19 | 3  | -16.22558  | 12 | 12 | 4  | 4  | -8.04878    | 20 | 20 | 13 | 10 | 10.20429   | 24 | 22 | 15 | 15 | 13.06718   |
| 22 | 19 | 4  | 98.89440   | 12 | 12 | 5  | 1  | -0.09461    | 20 | 20 | 13 | 11 | 6.53616    | 24 | 22 | 16 | 16 | 1.50095    |
| 22 | 19 | 5  | -82.77978  | 12 | 12 | 5  | 3  | -1.88815    | 20 | 20 | 13 | 12 | 0.87979    | 24 | 22 | 17 | 17 | -23.92693  |
| 22 | 19 | 6  | -102.43640 | 12 | 12 | 5  | 4  | 3.79333     | 20 | 20 | 13 | 13 | -4.75673   | 24 | 22 | 18 | 18 | -20.40615  |
| 22 | 19 | 7  | -21.35812  | 12 | 12 | 5  | 5  | -5.10734    | 20 | 20 | 14 | 14 | 10.75105   | 24 | 22 | 19 | 19 | 2.86640    |
| 22 | 19 | 8  | 52.05611   | 12 | 12 | 6  | 2  | 0.42138     | 20 | 20 | 15 | 14 | -12.07618  | 24 | 22 | 20 | 20 | 8.60424    |
| 22 | 19 | 9  | -17.37823  | 12 | 12 | 6  | 3  | 3.39196     | 20 | 20 | 15 | 15 | 31.37687   | 24 | 22 | 21 | 21 | 5.39513    |
| 22 | 20 | 1  | -117.03427 | 12 | 12 | 6  | 4  | 3.39393     | 20 | 20 | 16 | 14 | 9.87694    | 24 | 22 | 22 | 17 | 1.06012    |
| 22 | 20 | 2  | 62.35770   | 12 | 12 | 6  | 5  | -5.03919    | 20 | 20 | 16 | 15 | -4.87105   | 24 | 22 | 22 | 18 | -1.19775   |
| 22 | 20 | 3  | 44.66539   | 12 | 12 | 6  | 6  | -21.27824   | 20 | 20 | 16 | 16 | -9.44396   | 24 | 22 | 22 | 19 | 2.23752    |
| 22 | 20 | 4  | 13.75749   | 12 | 12 | 7  | 1  | -0.57523    | 20 | 20 | 17 | 17 | -106.52713 | 24 | 22 | 22 | 20 | -6.12366   |
| 22 | 20 | 6  | -28.77960  | 12 | 12 | 7  | 3  | -0.14182    | 20 | 20 | 18 | 17 | 46.06129   | 24 | 22 | 22 | 21 | -4.18781   |
| 22 | 20 | 7  | 10.44820   | 12 | 12 | 7  | 4  | 1.98679     | 20 | 20 | 18 | 18 | -67.82010  | 24 | 22 | 22 | 22 | 9.25553    |
| 22 | 20 | 8  | -29.12474  | 12 | 12 | 7  | 5  | 0.66123     | 20 | 20 | 19 | 17 | -1.34536   | 24 | 23 | 1  | 1  | 10.40946   |
| 22 | 20 | 9  | 8.77622    | 12 | 12 | 7  | 6  | 6.26578     | 20 | 20 | 19 | 18 | 2.11741    | 24 | 23 | 2  | 2  | -0.19666   |
| 22 | 21 | 1  | -21.21233  | 12 | 12 | 7  | 7  | -8.78138    | 20 | 20 | 19 | 19 | 14.31848   | 24 | 23 | 3  | 3  | 5.20032    |
| 22 | 21 | 2  | -54.00618  | 12 | 12 | 8  | 1  | 0.46197     | 20 | 20 | 20 | 17 | -0.05513   | 24 | 23 | 4  | 4  | -0.62623   |
| 22 | 21 | 3  | -1.45227   | 12 | 12 | 8  | 2  | 0.26445     | 20 | 20 | 20 | 18 | 2.47857    | 24 | 23 | 5  | 5  | -3.07824   |
| 22 | 21 | 4  | 3.78659    | 12 | 12 | 8  | 4  | 1.28261     | 20 | 20 | 20 | 19 | -3.91304   | 24 | 23 | 6  | 6  | -5.93396   |
| 22 | 21 | 5  | -52.80811  | 12 | 12 | 8  | 5  | -0.36174    | 20 | 20 | 20 | 20 | 34.50834   | 24 | 23 | 7  | 7  | 0.89078    |
| 22 | 21 | 6  | -53.08898  | 12 | 12 | 8  | 6  | 4.61550     | 21 | 17 | 1  | 1  | 2.96050    | 24 | 23 | 8  | 8  | -3.23120   |
| 22 | 21 | 7  | -16.63466  | 12 | 12 | 8  | 7  | -3.54002    | 21 | 17 | 2  | 2  | 4.13991    | 24 | 23 | 9  | 9  | -0.83011   |
| 22 | 21 | 8  | -3.96583   | 12 | 12 | 8  | 8  | -9.75128    | 21 | 17 | 3  | 3  | -1.65815   | 24 | 23 | 10 | 10 | -1.65500   |
| 22 | 21 | 9  | 18.40211   | 12 | 12 | 9  | 2  | -0.40520    | 21 | 17 | 4  | 4  | 1.63350    | 24 | 23 | 11 | 11 | -0.20825   |
| 22 | 22 | 1  | 122.90416  | 12 | 12 | 9  | 3  | -1.90068    | 21 | 17 | 5  | 5  | 0.52743    | 24 | 23 | 12 | 12 | -0.22431   |
| 22 | 22 | 2  | -21.66351  | 12 | 12 | 9  | 4  | 1.01736     | 21 | 17 | 6  | 6  | -0.66521   | 24 | 23 | 14 | 14 | -0.95330   |
| 22 | 22 | 3  | 30.37648   | 12 | 12 | 9  | 5  | -0.50079    | 21 | 17 | 7  | 7  | -0.66615   | 24 | 23 | 15 | 15 | -1.02887   |
| 22 | 22 | 4  | -25.90034  | 12 | 12 | 9  | 6  | 1.27770     | 21 | 17 | 9  | 9  | -0.43049   | 24 | 23 | 16 | 16 | -1.18793   |
| 22 | 22 | 5  | 39.12066   | 12 | 12 | 9  | 7  | -0.71025    | 21 | 17 | 10 | 10 | -2.47185   | 24 | 23 | 17 | 17 | 7.43954    |
| 22 | 22 | 6  | 27.83254   | 12 | 12 | 9  | 8  | -0.29129    | 21 | 17 | 11 | 11 | 0.28004    | 24 | 23 | 18 | 18 | 2.36394    |
| 22 | 22 | 7  | 43.02728   | 12 | 12 | 9  | 9  | -1.93782    | 21 | 17 | 12 | 12 | -0.12252   | 24 | 23 | 19 | 19 | 0.69830    |
| 22 | 22 | 8  | -54.16961  | 12 | 12 | 10 | 10 | 73.76670    | 21 | 17 | 13 | 13 | 0.88045    | 24 | 23 | 20 | 20 | -4.03836   |
| 22 | 22 | 9  | 26.52070   | 12 | 12 | 11 | 10 | -7.95727    | 21 | 17 | 14 | 14 | -1.51914   | 24 | 23 | 21 | 21 | -0.68993   |
| 23 | 14 | 10 | -6.57533   | 12 | 12 | 11 | 11 | 15.36455    | 21 | 17 | 15 | 15 | -1.23795   | 24 | 23 | 22 | 22 | -2.67896   |
| 23 | 14 | 11 | -20.67910  | 12 | 12 | 12 | 10 | -55.61802   | 21 | 17 | 16 | 16 | -0.96758   | 24 | 23 | 23 | 17 | 0.49531    |
| 23 | 14 | 12 | -8.32470   | 12 | 12 | 12 | 11 | 8.77457     | 21 | 17 | 17 | 17 | 3.72298    | 24 | 23 | 23 | 18 | -0.30368   |
| 23 | 14 | 13 | 12.75161   | 12 | 12 | 12 | 12 | 52.22124    | 21 | 18 | 1  | 1  | -0.46095   | 24 | 23 | 23 | 19 | 2.49245    |
| 23 | 15 | 10 | 19.24057   | 13 | 10 | 1  | 1  | -102.43358  | 21 | 18 | 2  | 2  | 4.54372    | 24 | 23 | 23 | 22 | 0.18961    |
| 23 | 15 | 11 | -0.67345   | 13 | 10 | 2  | 2  | -35.13407   | 21 | 18 | 3  | 3  | -1.27141   | 24 | 23 | 23 | 23 | -4.11569   |
| 23 | 15 | 12 | -22.54530  | 13 | 10 | 3  | 3  | 15.04020    | 21 | 18 | 4  | 4  | 2.89636    | 24 | 24 | 1  | 1  | -10.06366  |
| 23 | 15 | 13 | -1.09759   | 13 | 10 | 4  | 4  | 4.40282     | 21 | 18 | 5  | 5  | 2.2237     | 24 | 24 | 2  | 1  | -4.08308   |
| 23 | 16 | 10 | -1.83162   | 13 | 10 | 5  | 5  | 12.39725    | 21 | 18 | 6  | 6  | 0.22404    | 24 | 24 | 2  | 2  | -21.86771  |
| 23 | 16 | 11 | 23.54431   | 13 | 10 | 6  | 6  | 8.00415     | 21 | 18 | 7  | 7  | -0.11156   | 24 | 24 | 3  | 1  | 1.45611    |
| 23 | 16 | 12 | 16.99599   | 13 | 10 | 7  | 7  | 8.81330     | 21 | 18 | 9  | 9  | -0.16302   | 24 | 24 | 3  | 2  | -0.76281   |
| 23 | 16 | 13 | 1.34810    | 13 | 10 | 8  | 8  | 4.39811     | 21 | 18 | 10 | 10 | 0.88359    | 24 | 24 | 3  | 3  | -9.68540   |
| 23 | 17 | 1  | -2.57718   | 13 | 10 | 9  | 9  | 2.83979     | 21 | 18 | 11 | 11 | 1.41336    | 24 | 24 | 4  | 1  | 0.34071    |
| 23 | 17 | 2  | -0.69878   | 13 | 10 | 10 | 10 | 26.48905    | 21 | 18 | 13 | 13 | 1.74937    | 24 | 24 | 4  | 3  | 4.12377    |
| 23 | 17 | 3  | -19.46016  | 13 | 11 | 1  | 1  | -62.83479   | 21 | 18 | 15 | 15 | 3.46571    | 24 | 24 | 4  | 4  | 4.86132    |
| 23 | 17 | 4  | -6.83282   | 13 | 11 | 2  | 2  | 35.98379    | 21 | 18 | 16 | 16 | -1.34125   | 24 | 24 | 5  | 1  | -0.53524   |
| 23 | 17 | 5  | 44.45331   | 13 | 11 | 3  | 3  | 9.80672     | 21 | 18 | 17 | 17 | 1.01717    | 24 | 24 | 5  | 2  | 0.49107    |
| 23 | 17 | 6  | -34.70010  | 13 | 11 | 4  | 4  | -6.48363    | 21 | 18 | 18 | 17 | 3.64592    | 24 | 24 | 5  | 3  | -3.08366   |
| 23 | 17 | 7  | -18.61227  | 13 | 11 | 5  | 5  | 5.66208     | 21 | 18 | 18 | 18 | 3.13223    | 24 | 24 | 5  | 4  | 6.15639    |
| 23 | 17 | 8  | -10.21717  | 13 | 11 | 6  | 6  | 4.95180     | 21 | 19 | 1  | 1  | 8.79434    | 24 | 24 | 5  | 5  | 3.22999    |
| 23 | 17 | 9  | -28.25329  | 13 | 11 | 7  | 7  | 1.00844     | 21 | 19 |    |    |            |    |    |    |    |            |

| I  | J  | K  | F(I,J,K)  | I  | J  | K  | L  | F(I,J,K,L) | I  | J  | K  | L  | F(I,J,K,L) | I  | J  | K  | L  | F(I,J,K,L) |
|----|----|----|-----------|----|----|----|----|------------|----|----|----|----|------------|----|----|----|----|------------|
| 23 | 19 | 2  | 17.99912  | 13 | 12 | 6  | 6  | 8.53025    | 21 | 19 | 13 | 13 | -1.17339   | 24 | 24 | 7  | 6  | 3.33359    |
| 23 | 19 | 3  | 17.24840  | 13 | 12 | 7  | 7  | -2.56691   | 21 | 19 | 14 | 14 | -13.80896  | 24 | 24 | 7  | 7  | -0.91457   |
| 23 | 19 | 4  | -19.22076 | 13 | 12 | 8  | 8  | 6.34866    | 21 | 19 | 15 | 15 | -9.62010   | 24 | 24 | 8  | 3  | -1.24830   |
| 23 | 19 | 5  | 34.64650  | 13 | 12 | 9  | 9  | -1.89296   | 21 | 19 | 16 | 16 | -14.77015  | 24 | 24 | 8  | 4  | 3.77801    |
| 23 | 19 | 6  | 63.63074  | 13 | 12 | 10 | 10 | 33.55299   | 21 | 19 | 17 | 17 | 26.63527   | 24 | 24 | 8  | 6  | 3.12537    |
| 23 | 19 | 7  | -7.49785  | 13 | 12 | 11 | 11 | 8.68907    | 21 | 19 | 18 | 18 | 59.34022   | 24 | 24 | 8  | 7  | -1.63061   |
| 23 | 19 | 8  | -25.11868 | 13 | 12 | 12 | 10 | -14.80944  | 21 | 19 | 19 | 17 | -2.24403   | 24 | 24 | 8  | 8  | -3.14631   |
| 23 | 19 | 9  | 8.22393   | 13 | 12 | 12 | 11 | -2.51205   | 21 | 19 | 19 | 18 | -3.06533   | 24 | 24 | 9  | 3  | 0.67008    |
| 23 | 20 | 1  | 48.83202  | 13 | 12 | 12 | 12 | 7.85044    | 21 | 19 | 19 | 19 | 3.08328    | 24 | 24 | 9  | 4  | -1.55564   |
| 23 | 20 | 2  | -15.12398 | 13 | 13 | 1  | 1  | -45.15448  | 21 | 20 | 1  | 1  | 3.25573    | 24 | 24 | 9  | 5  | -2.38040   |
| 23 | 20 | 3  | -43.19843 | 13 | 13 | 2  | 1  | 11.79947   | 21 | 20 | 2  | 2  | 63.39594   | 24 | 24 | 9  | 6  | 0.69808    |
| 23 | 20 | 4  | 12.48865  | 13 | 13 | 2  | 2  | -11.69599  | 21 | 20 | 3  | 3  | 1.02921    | 24 | 24 | 9  | 7  | 1.08244    |
| 23 | 20 | 5  | 26.52375  | 13 | 13 | 3  | 1  | 2.13888    | 21 | 20 | 4  | 4  | -17.72587  | 24 | 24 | 9  | 9  | 1.66537    |
| 23 | 20 | 6  | 25.50017  | 13 | 13 | 3  | 2  | -1.05879   | 21 | 20 | 5  | 5  | 0.81528    | 24 | 24 | 10 | 10 | 2.72755    |
| 23 | 20 | 7  | -19.15221 | 13 | 13 | 3  | 3  | -30.64186  | 21 | 20 | 6  | 6  | 18.27402   | 24 | 24 | 11 | 10 | -2.23161   |
| 23 | 20 | 8  | 7.57592   | 13 | 13 | 4  | 1  | 0.82718    | 21 | 20 | 7  | 7  | -9.70025   | 24 | 24 | 11 | 11 | 5.18125    |
| 23 | 20 | 9  | -3.52267  | 13 | 13 | 4  | 2  | 2.59935    | 21 | 20 | 8  | 8  | -0.30290   | 24 | 24 | 12 | 10 | 1.64663    |
| 23 | 21 | 1  | -1.43546  | 13 | 13 | 4  | 3  | 7.13534    | 21 | 20 | 9  | 9  | -1.94830   | 24 | 24 | 12 | 11 | -1.39105   |
| 23 | 21 | 2  | -4.58169  | 13 | 13 | 4  | 4  | -16.48169  | 21 | 20 | 10 | 10 | -4.16530   | 24 | 24 | 12 | 12 | -2.50469   |
| 23 | 21 | 3  | -24.00153 | 13 | 13 | 5  | 1  | -0.22090   | 21 | 20 | 11 | 11 | -12.40156  | 24 | 24 | 13 | 10 | 2.73847    |
| 23 | 21 | 4  | -5.31169  | 13 | 13 | 5  | 2  | 0.17761    | 21 | 20 | 12 | 12 | -3.94334   | 24 | 24 | 13 | 11 | -0.38783   |
| 23 | 21 | 5  | 15.88710  | 13 | 13 | 5  | 3  | -12.06555  | 21 | 20 | 13 | 13 | -0.65704   | 24 | 24 | 13 | 12 | -1.50564   |
| 23 | 21 | 6  | 49.96721  | 13 | 13 | 5  | 4  | 6.85580    | 21 | 20 | 14 | 14 | -12.27352  | 24 | 24 | 13 | 13 | 4.28129    |
| 23 | 21 | 7  | -25.03980 | 13 | 13 | 5  | 5  | -7.04499   | 21 | 20 | 15 | 15 | -6.93840   | 24 | 24 | 14 | 14 | 3.17970    |
| 23 | 21 | 8  | -3.43889  | 13 | 13 | 6  | 1  | 1.48624    | 21 | 20 | 16 | 16 | -9.99132   | 24 | 24 | 15 | 14 | 2.75341    |
| 23 | 21 | 9  | -3.76034  | 13 | 13 | 6  | 2  | -0.90409   | 21 | 20 | 17 | 17 | 18.72186   | 24 | 24 | 15 | 15 | 5.09690    |
| 23 | 22 | 1  | -47.71538 | 13 | 13 | 6  | 3  | 2.81761    | 21 | 20 | 18 | 18 | 47.99016   | 24 | 24 | 16 | 14 | 1.91744    |
| 23 | 22 | 2  | 9.41967   | 13 | 13 | 6  | 4  | 1.10959    | 21 | 20 | 20 | 17 | -2.87271   | 24 | 24 | 16 | 15 | -0.78966   |
| 23 | 22 | 3  | -26.77303 | 13 | 13 | 6  | 5  | -3.42471   | 21 | 20 | 20 | 18 | -0.84704   | 24 | 24 | 16 | 16 | -3.18684   |
| 23 | 22 | 4  | 26.19416  | 13 | 13 | 6  | 6  | -15.49463  | 21 | 20 | 20 | 19 | 1.31941    | 24 | 24 | 17 | 17 | -12.59816  |
| 23 | 22 | 5  | -25.17381 | 13 | 13 | 7  | 1  | -0.76846   | 21 | 20 | 20 | 20 | 0.69179    | 24 | 24 | 18 | 17 | -6.92663   |
| 23 | 22 | 6  | 22.68976  | 13 | 13 | 7  | 2  | 1.08415    | 21 | 21 | 1  | 1  | -12.87761  | 24 | 24 | 18 | 18 | -18.74880  |
| 23 | 22 | 7  | -6.90652  | 13 | 13 | 7  | 3  | 10.87368   | 21 | 21 | 2  | 1  | -39.99806  | 24 | 24 | 19 | 17 | 1.10147    |
| 23 | 22 | 8  | 18.69889  | 13 | 13 | 7  | 4  | 4.27751    | 21 | 21 | 2  | 2  | -127.45015 | 24 | 24 | 19 | 18 | -0.28306   |
| 23 | 22 | 9  | -17.22119 | 13 | 13 | 7  | 5  | 4.40277    | 21 | 21 | 3  | 1  | -1.43409   | 24 | 24 | 19 | 19 | 0.62622    |
| 23 | 23 | 1  | 8.92899   | 13 | 13 | 7  | 6  | 10.61511   | 21 | 21 | 3  | 2  | -3.35462   | 24 | 24 | 20 | 17 | -1.09782   |
| 23 | 23 | 2  | -7.04659  | 13 | 13 | 7  | 7  | -23.05271  | 21 | 21 | 3  | 3  | 2.04780    | 24 | 24 | 20 | 18 | 0.79615    |
| 23 | 23 | 3  | 22.37847  | 13 | 13 | 8  | 1  | -0.84763   | 21 | 21 | 4  | 1  | 2.31158    | 24 | 24 | 20 | 19 | 0.99242    |
| 23 | 23 | 4  | -23.67367 | 13 | 13 | 8  | 2  | 0.56020    | 21 | 21 | 4  | 2  | 6.80837    | 24 | 24 | 20 | 20 | 2.67259    |
| 23 | 23 | 5  | 15.90795  | 13 | 13 | 8  | 3  | -7.03352   | 21 | 21 | 4  | 3  | 9.22347    | 24 | 24 | 21 | 17 | 0.46944    |
| 23 | 23 | 6  | -23.92133 | 13 | 13 | 8  | 4  | 7.04572    | 21 | 21 | 4  | 4  | 34.30807   | 24 | 24 | 21 | 18 | 0.46218    |
| 23 | 23 | 7  | 11.34896  | 13 | 13 | 8  | 5  | -2.76552   | 21 | 21 | 5  | 1  | 1.79762    | 24 | 24 | 21 | 19 | -5.22562   |
| 23 | 23 | 8  | -27.36826 | 13 | 13 | 8  | 6  | 10.42821   | 21 | 21 | 5  | 2  | 3.96207    | 24 | 24 | 21 | 20 | -4.22993   |
| 23 | 23 | 9  | 2.39134   | 13 | 13 | 8  | 7  | -7.12701   | 21 | 21 | 5  | 3  | -0.48504   | 24 | 24 | 21 | 21 | 8.32643    |
| 24 | 14 | 10 | 6.59077   | 13 | 13 | 8  | 8  | -19.07696  | 21 | 21 | 5  | 4  | 16.13254   | 24 | 24 | 22 | 17 | 0.66573    |
| 24 | 14 | 11 | 0.75151   | 13 | 13 | 9  | 1  | 0.84422    | 21 | 21 | 5  | 5  | 15.84931   | 24 | 24 | 22 | 19 | 3.86936    |
| 24 | 14 | 12 | -4.80143  | 13 | 13 | 9  | 4  | 0.67044    | 21 | 21 | 6  | 1  | 1.70464    | 24 | 24 | 22 | 20 | -1.10739   |
| 24 | 14 | 13 | 9.58440   | 13 | 13 | 9  | 5  | -3.05022   | 21 | 21 | 6  | 2  | 6.03588    | 24 | 24 | 22 | 21 | -3.44739   |
| 24 | 15 | 10 | -8.04366  | 13 | 13 | 9  | 6  | 0.64476    | 21 | 21 | 6  | 3  | -6.06166   | 24 | 24 | 22 | 22 | 2.60329    |
| 24 | 15 | 12 | 5.03760   | 13 | 13 | 9  | 7  | 3.16601    | 21 | 21 | 6  | 4  | -10.80115  | 24 | 24 | 23 | 17 | 0.29885    |
| 24 | 15 | 13 | 12.06818  | 13 | 13 | 9  | 8  | 0.83379    | 21 | 21 | 6  | 5  | 4.96504    | 24 | 24 | 23 | 18 | 0.52301    |
| 24 | 16 | 10 | 5.93627   | 13 | 13 | 9  | 9  | -4.41178   | 21 | 21 | 6  | 6  | 15.47739   | 24 | 24 | 23 | 19 | 0.97480    |
| 24 | 16 | 12 | -3.07426  | 13 | 13 | 10 | 10 | 48.29103   | 21 | 21 | 7  | 1  | 0.39944    | 24 | 24 | 23 | 20 | 0.73686    |
| 24 | 16 | 13 | 14.65720  | 13 | 13 | 11 | 10 | 17.50967   | 21 | 21 | 7  | 2  | 1.41402    | 24 | 24 | 23 | 21 | -0.20521   |
| 24 | 17 | 1  | 1.61804   | 13 | 13 | 11 | 11 | 20.63575   | 21 | 21 | 7  | 3  | 3.99927    | 24 | 24 | 23 | 22 | -2.58867   |
| 24 | 17 | 2  | -1.66786  | 13 | 13 | 12 | 10 | -5.56628   | 21 | 21 | 7  | 4  | 28.09905   | 24 | 24 | 23 | 23 | -3.66313   |
| 24 | 17 | 3  | 11.61341  | 13 | 13 | 12 | 12 | 12.27810   | 21 | 21 | 7  | 5  | 12.01788   | 24 | 24 | 24 | 17 | 0.15488    |
| 24 | 17 | 4  | -52.11603 | 13 | 13 | 13 | 10 | 8.23025    | 21 | 21 | 7  | 6  | -3.43523   | 24 | 24 | 24 | 18 | 0.30133    |
| 24 | 17 | 5  | -64.39668 | 13 | 13 | 13 | 11 | 5.06288    | 21 | 21 | 7  | 7  | 14.97792   | 24 | 24 | 24 | 19 | 3.43207    |
| 24 | 17 | 6  | 37.29770  | 13 | 13 | 13 | 13 | 55.13462   | 21 | 21 | 8  | 1  | 0.12612    | 24 | 24 | 24 | 20 | 1.61313    |
| 24 | 17 | 7  | -12.99453 | 14 | 14 | 1  | 1  | -117.61932 | 21 | 21 | 8  | 2  | 0.25909    | 24 | 24 | 24 | 21 | -3.90364   |
| 24 | 17 | 8  | 0.75906   | 14 | 14 | 2  | 1  | -37.25147  | 21 | 21 | 8  | 3  | -1.86478   | 24 | 24 | 24 | 22 | 2.97914    |
| 24 | 17 | 9  | 26.44017  | 14 | 14 | 2  | 2  | -227.28365 | 21 | 21 | 8  | 4  | 7.18024    | 24 | 24 | 24 | 23 | -1.18696   |
| 24 | 18 | 1  | -2.01952  | 14 | 14 | 3  | 1  | -1.42170   | 21 | 21 | 8  | 5  | 5.21682    | 24 | 24 | 24 | 24 | 6.35496    |
| 24 | 18 | 2  | -0.82217  | 14 | 14 | 3  | 2  | -3.99839   | 21 | 21 | 8  | 6  | 7.97933    |    |    |    |    |            |
| 24 | 18 | 3  | -33.42973 | 14 | 14 | 3  | 3  | 1.08129    | 21 | 21 | 8  | 7  | 2.31413    |    |    |    |    |            |
| 24 | 18 | 4  | -75.10005 | 14 | 14 | 4  | 1  | -0.70145   | 21 | 21 | 8  | 8  | 1.84527    |    |    |    |    |            |

Table S37: The quartic potential energy surface of Pyridazine-d4 The calculation was done by using B3LYP/6-311++G(2d,2p) method. The force constants (F<sub>I</sub>) are in cm<sup>-1</sup> units.

| I J   | F(I,J)     | I J K   | F(I,J,K)   | I J K L     | F(I,J,K,L) | I J K L     | F(I,J,K,L) |
|-------|------------|---------|------------|-------------|------------|-------------|------------|
| 1 1   | 2375.60974 | 24 17 9 | 36.86225   | 13 13 13 11 | 4.96428    | 21 21 7 2   | -0.79320   |
| 2 2   | 2346.20079 | 24 18 1 | 8.67710    | 13 13 13 12 | 2.59283    | 21 21 7 3   | -0.57720   |
| 3 3   | 1563.49343 | 24 18 2 | -4.16742   | 13 13 13 13 | 46.52253   | 21 21 7 4   | -3.28557   |
| 4 4   | 1346.45706 | 24 18 3 | -13.86587  | 14 14 1 1   | -54.08337  | 21 21 7 5   | -0.43522   |
| 5 5   | 1149.84129 | 24 18 4 | 36.72155   | 14 14 2 1   | -18.07776  | 21 21 7 6   | 1.00151    |
| 6 6   | 984.19758  | 24 18 5 | 3.02876    | 14 14 2 2   | -95.90422  | 21 21 7 7   | 5.20971    |
| 7 7   | 872.00208  | 24 18 6 | 7.35759    | 14 14 3 1   | -1.99193   | 21 21 8 1   | 0.20233    |
| 8 8   | 847.31932  | 24 18 7 | -57.95572  | 14 14 3 2   | 3.64214    | 21 21 8 2   | -0.38728   |
| 9 9   | 654.74241  | 24 18 8 | 43.83244   | 14 14 3 3   | -3.67622   | 21 21 8 3   | -1.03187   |
| 10 10 | 854.95643  | 24 18 9 | -15.97230  | 14 14 4 1   | 1.75069    | 21 21 8 4   | 0.71099    |
| 11 11 | 748.79764  | 24 19 1 | 31.51510   | 14 14 4 2   | 0.86840    | 21 21 8 5   | 0.63827    |
| 12 12 | 692.43066  | 24 19 2 | 24.69839   | 14 14 4 3   | -0.81884   | 21 21 8 6   | 0.47102    |
| 13 13 | 343.22178  | 24 19 3 | -4.41193   | 14 14 4 4   | -1.21011   | 21 21 8 7   | -0.37261   |
| 14 14 | 807.38673  | 24 19 4 | -23.03301  | 14 14 5 1   | 1.77323    | 21 21 8 8   | 1.20085    |
| 15 15 | 570.20958  | 24 19 5 | 20.34325   | 14 14 5 2   | -1.57882   | 21 21 9 2   | 0.43481    |
| 16 16 | 328.98380  | 24 19 6 | -18.27203  | 14 14 5 3   | -2.33947   | 21 21 9 3   | -0.74632   |
| 17 17 | 2358.69454 | 24 19 7 | 5.56391    | 14 14 5 4   | 1.12583    | 21 21 9 4   | -0.24748   |
| 18 18 | 2339.89984 | 24 19 8 | 8.35460    | 14 14 5 5   | -5.19709   | 21 21 9 5   | 0.56696    |
| 19 19 | 1559.71882 | 24 19 9 | 18.11512   | 14 14 6 1   | -2.47769   | 21 21 9 6   | 0.55751    |
| 20 20 | 1302.65706 | 24 20 1 | -29.65881  | 14 14 6 2   | -2.73939   | 21 21 9 7   | -0.20439   |
| 21 21 | 1053.72010 | 24 20 2 | 25.21231   | 14 14 6 3   | 1.96919    | 21 21 9 8   | -1.12822   |
| 22 22 | 1002.86571 | 24 20 3 | 11.38172   | 14 14 6 4   | 1.13363    | 21 21 9 9   | -1.02054   |
| 23 23 | 851.01632  | 24 20 4 | -36.35149  | 14 14 6 5   | 0.27755    | 21 21 10 10 | 1.70162    |
| 24 24 | 617.43850  | 24 20 5 | 8.01704    | 14 14 6 6   | -2.98394   | 21 21 11 10 | 0.66161    |
|       |            | 24 20 6 | -8.60607   | 14 14 7 1   | -0.51468   | 21 21 12 10 | 0.99494    |
| I J K | F(I,J,K)   | 24 20 7 | -15.76698  | 14 14 7 2   | -1.62720   | 21 21 12 11 | 1.05469    |
|       |            | 24 20 9 | 8.09309    | 14 14 7 3   | -1.03494   | 21 21 12 12 | -2.29459   |
| 1 1 1 | -724.97613 | 24 21 1 | 3.73092    | 14 14 7 4   | -8.29055   | 21 21 13 10 | -1.08800   |
| 2 1 1 | 164.29504  | 24 21 2 | -37.14058  | 14 14 7 5   | 2.45050    | 21 21 13 11 | 0.23881    |
| 2 2 1 | -366.31056 | 24 21 3 | -5.90870   | 14 14 7 6   | 2.00531    | 21 21 13 12 | -1.72075   |
| 2 2 2 | -668.59509 | 24 21 4 | 8.03485    | 14 14 7 7   | 12.30721   | 21 21 13 13 | -4.61007   |
| 3 1 1 | -54.82361  | 24 21 5 | -13.88723  | 14 14 8 1   | -2.24654   | 21 21 14 14 | 0.58856    |
| 3 2 1 | 47.22178   | 24 21 6 | -5.21838   | 14 14 8 2   | -0.43377   | 21 21 15 14 | -0.27913   |
| 3 2 2 | 30.69760   | 24 21 7 | -3.41360   | 14 14 8 3   | -2.53699   | 21 21 15 15 | -1.19020   |
| 3 3 1 | 85.95348   | 24 21 8 | 0.51960    | 14 14 8 4   | 0.69459    | 21 21 16 16 | -5.42689   |
| 3 3 2 | -42.10440  | 24 21 9 | -6.99179   | 14 14 8 5   | 1.90846    | 21 21 17 17 | -10.71181  |
| 3 3 3 | -197.59620 | 24 22 1 | -5.30262   | 14 14 8 6   | 1.35281    | 21 21 18 17 | -6.41229   |
| 4 1 1 | 65.37882   | 24 22 2 | -66.41314  | 14 14 8 7   | -1.19337   | 21 21 18 18 | -11.86169  |
| 4 2 1 | -7.64113   | 24 22 3 | 2.18731    | 14 14 8 8   | 4.65928    | 21 21 19 17 | 1.30705    |
| 4 2 2 | 32.76299   | 24 22 4 | -13.22123  | 14 14 9 1   | 0.16635    | 21 21 19 18 | 2.29402    |
| 4 3 1 | 4.02001    | 24 22 5 | 1.08635    | 14 14 9 2   | -1.50139   | 21 21 19 19 | -9.03230   |
| 4 3 2 | 3.70469    | 24 22 6 | -5.07516   | 14 14 9 3   | 1.38228    | 21 21 20 17 | 1.01676    |
| 4 3 3 | 42.95127   | 24 22 7 | 3.23295    | 14 14 9 4   | 0.56330    | 21 21 20 18 | 1.01220    |
| 4 4 1 | 30.14508   | 24 22 8 | 9.22072    | 14 14 9 5   | -1.83477   | 21 21 20 19 | -3.54793   |
| 4 4 2 | 70.34999   | 24 22 9 | 6.47774    | 14 14 9 6   | -0.29547   | 21 21 20 20 | -4.02430   |
| 4 4 3 | 41.93148   | 24 23 1 | -55.42792  | 14 14 9 7   | -2.61984   | 21 21 21 17 | -0.14370   |
| 4 4 4 | 6.14630    | 24 23 2 | -17.80576  | 14 14 9 8   | -3.60754   | 21 21 21 18 | 0.18866    |
| 5 1 1 | 28.54566   | 24 23 3 | -2.70745   | 14 14 9 9   | 2.18893    | 21 21 21 20 | 1.16851    |
| 5 2 1 | -19.18291  | 24 23 4 | 11.78751   | 14 14 10 10 | 52.76779   | 21 21 21 21 | -0.47391   |
| 5 2 2 | -0.30948   | 24 23 5 | 2.52232    | 14 14 11 10 | 3.57171    | 22 17 1 1   | 5.81538    |
| 5 3 1 | -52.43809  | 24 23 6 | -9.86953   | 14 14 11 11 | 44.24946   | 22 17 2 2   | 2.42136    |
| 5 3 2 | 22.42178   | 24 23 7 | 3.27725    | 14 14 12 10 | 27.22191   | 22 17 3 3   | -2.04914   |
| 5 3 3 | 97.17213   | 24 23 8 | -23.45241  | 14 14 12 11 | 28.02065   | 22 17 4 4   | -0.94167   |
| 5 4 1 | -10.65688  | 24 23 9 | 4.12693    | 14 14 12 12 | 42.07747   | 22 17 5 5   | -0.53715   |
| 5 4 2 | -31.39787  | 24 24 1 | 31.60195   | 14 14 13 10 | -18.28204  | 22 17 6 6   | -0.20201   |
| 5 4 3 | -139.54208 | 24 24 2 | 34.11737   | 14 14 13 11 | 5.96774    | 22 17 7 7   | -0.44162   |
| 5 4 4 | -13.07176  | 24 24 3 | 16.66465   | 14 14 13 12 | -13.98028  | 22 17 9 9   | 0.14298    |
| 5 5 1 | 34.39817   | 24 24 4 | 2.34358    | 14 14 13 13 | 16.07984   | 22 17 10 10 | -0.52702   |
| 5 5 2 | 7.20286    | 24 24 5 | -2.11857   | 14 14 14 14 | 59.40529   | 22 17 11 11 | -1.09005   |
| 5 5 3 | -47.62032  | 24 24 6 | -4.00350   | 15 14 1 1   | -69.26337  | 22 17 12 12 | -0.19154   |
| 5 5 4 | -182.03265 | 24 24 7 | -1.23256   | 15 14 2 2   | 67.72613   | 22 17 14 14 | -0.20836   |
| 5 5 5 | 119.34545  | 24 24 8 | 9.53367    | 15 14 3 3   | 2.56115    | 22 17 15 15 | -1.34150   |
| 6 1 1 | -58.74518  |         |            | 15 14 4 4   | -3.73690   | 22 17 16 16 | -0.26609   |
| 6 2 1 | -3.46042   | I J K L | F(I,J,K,L) | 15 14 5 5   | 3.75429    | 22 17 17 17 | 3.28754    |
| 6 2 2 | -55.36875  |         |            | 15 14 6 6   | 0.48371    | 22 18 1 1   | -4.88698   |
| 6 3 1 | -9.23755   | 1 1 1 1 | 221.10900  | 15 14 7 7   | -12.92356  | 22 18 2 2   | -2.01199   |
| 6 3 2 | -6.17250   | 2 1 1 1 | -70.63778  | 15 14 8 8   | 12.60044   | 22 18 3 3   | 0.50117    |
| 6 3 3 | -145.55838 | 2 2 1 1 | 63.45086   | 15 14 9 9   | 5.35486    | 22 18 4 4   | -2.42854   |
| 6 4 1 | -15.20870  | 2 2 2 1 | 72.09114   | 15 14 10 10 | 15.66928   | 22 18 5 5   | -0.88996   |
| 6 4 2 | -10.04017  | 2 2 2 2 | 227.62475  | 15 14 11 11 | 16.96064   | 22 18 6 6   | -0.91918   |
| 6 4 3 | -50.73208  | 3 1 1 1 | 17.62710   | 15 14 12 12 | -37.35749  | 22 18 7 7   | 0.09424    |
| 6 4 4 | -126.90085 | 3 2 1 1 | -10.02277  | 15 14 13 13 | 15.13446   | 22 18 8 8   | 0.71103    |
| 6 5 1 | 5.90251    | 3 2 2 1 | -2.82271   | 15 14 14 14 | -18.09998  | 22 18 9 9   | 0.41394    |
| 6 5 2 | 2.69032    | 3 2 2 2 | -17.96908  | 15 15 1 1   | -166.99584 | 22 18 10 10 | 0.65387    |
| 6 5 3 | -14.23214  | 3 3 1 1 | -11.30744  | 15 15 2 1   | 33.14236   | 22 18 11 11 | 2.28155    |
| 6 5 4 | -9.51512   | 3 3 2 1 | 3.95946    | 15 15 2 2   | -92.84654  | 22 18 12 12 | -0.25707   |
| 6 5 5 | -219.69675 | 3 3 2 2 | -1.97113   | 15 15 3 1   | -9.57866   | 22 18 13 13 | 1.34718    |
| 6 6 1 | 20.64851   | 3 3 3 1 | -15.58786  | 15 15 3 2   | 8.24285    | 22 18 14 14 | -0.39339   |
| 6 6 2 | 6.62924    | 3 3 3 2 | 5.12247    | 15 15 3 3   | 1.21029    | 22 18 15 15 | 2.85917    |
| 6 6 3 | -13.90656  | 3 3 3 3 | 49.95161   | 15 15 4 1   | 11.88444   | 22 18 16 16 | 0.78633    |
| 6 6 4 | -6.93321   | 4 1 1 1 | -18.79577  | 15 15 4 2   | -2.45653   | 22 18 17 17 | -0.80317   |
| 6 6 5 | -85.71001  | 4 2 1 1 | 5.13672    | 15 15 4 3   | 0.64775    | 22 18 18 17 | 2.46878    |
| 6 6 6 | -144.20989 | 4 2 2 1 | -6.43110   | 15 15 4 4   | -0.55106   | 22 18 18 18 | -3.80854   |
| 7 1 1 | 20.05726   | 4 2 2 2 | -6.39681   | 15 15 5 1   | 5.11073    | 22 19 1 1   | -3.95488   |
| 7 2 1 | -9.61550   | 4 3 1 1 | 1.74509    | 15 15 5 2   | -4.14905   | 22 19 2 2   | 25.35308   |
| 7 2 2 | -3.08983   | 4 3 2 2 | 2.11328    | 15 15 5 3   | -3.13825   | 22 19 3 3   | 0.11724    |

| I | J | K | F(I,J,K)  | I | J | K | L | F(I,J,K,L) | I  | J  | K  | L  | F(I,J,K,L) | I  | J  | K  | L  | F(I,J,K,L) |
|---|---|---|-----------|---|---|---|---|------------|----|----|----|----|------------|----|----|----|----|------------|
| 7 | 3 | 1 | -11.45474 | 4 | 3 | 3 | 1 | 5.39362    | 15 | 15 | 5  | 5  | -1.32873   | 22 | 19 | 4  | 4  | -0.69708   |
| 7 | 3 | 2 | 12.88756  | 4 | 3 | 3 | 2 | -1.96378   | 15 | 15 | 6  | 1  | -10.70342  | 22 | 19 | 5  | 5  | 11.24074   |
| 7 | 3 | 3 | 53.09408  | 4 | 3 | 3 | 3 | -5.76900   | 15 | 15 | 6  | 2  | -1.11711   | 22 | 19 | 6  | 6  | -1.02473   |
| 7 | 4 | 1 | -21.99480 | 4 | 4 | 1 | 1 | -3.95817   | 15 | 15 | 6  | 3  | -1.96360   | 22 | 19 | 7  | 7  | -10.86854  |
| 7 | 4 | 2 | -71.63248 | 4 | 4 | 2 | 1 | -11.08228  | 15 | 15 | 6  | 4  | 0.18656    | 22 | 19 | 8  | 8  | 2.55892    |
| 7 | 4 | 3 | -6.52084  | 4 | 4 | 2 | 2 | -30.66462  | 15 | 15 | 6  | 5  | 1.42176    | 22 | 19 | 9  | 9  | 0.74618    |
| 7 | 4 | 4 | 8.19511   | 4 | 4 | 3 | 1 | 2.76164    | 15 | 15 | 6  | 6  | -0.68190   | 22 | 19 | 10 | 10 | -0.47431   |
| 7 | 5 | 1 | 10.59619  | 4 | 4 | 3 | 2 | 3.86404    | 15 | 15 | 7  | 1  | 3.93914    | 22 | 19 | 11 | 11 | -1.91380   |
| 7 | 5 | 2 | 2.73444   | 4 | 4 | 3 | 3 | 13.72771   | 15 | 15 | 7  | 3  | -0.86367   | 22 | 19 | 12 | 12 | -4.34689   |
| 7 | 5 | 3 | -84.35144 | 4 | 4 | 4 | 1 | 1.15057    | 15 | 15 | 7  | 4  | -6.57464   | 22 | 19 | 13 | 13 | 1.74050    |
| 7 | 5 | 4 | -41.46769 | 4 | 4 | 4 | 2 | 4.00665    | 15 | 15 | 7  | 5  | 1.24275    | 22 | 19 | 14 | 14 | -3.04401   |
| 7 | 5 | 5 | -64.13324 | 4 | 4 | 4 | 3 | 8.58862    | 15 | 15 | 7  | 6  | 1.56295    | 22 | 19 | 15 | 15 | -1.15679   |
| 7 | 6 | 1 | -1.60469  | 4 | 4 | 4 | 4 | 5.90888    | 15 | 15 | 7  | 7  | 12.17885   | 22 | 19 | 16 | 16 | -8.44054   |
| 7 | 6 | 2 | 5.92761   | 5 | 1 | 1 | 1 | -7.88276   | 15 | 15 | 8  | 1  | -1.66008   | 22 | 19 | 17 | 17 | 9.05533    |
| 7 | 6 | 3 | -24.37001 | 5 | 2 | 1 | 1 | 3.53731    | 15 | 15 | 8  | 2  | -0.22639   | 22 | 19 | 18 | 18 | 12.18959   |
| 7 | 6 | 4 | -52.74863 | 5 | 2 | 2 | 1 | -1.26635   | 15 | 15 | 8  | 3  | -9.44367   | 22 | 19 | 19 | 17 | -1.50186   |
| 7 | 6 | 5 | -27.29258 | 5 | 2 | 2 | 2 | 1.10411    | 15 | 15 | 8  | 4  | 1.73615    | 22 | 19 | 19 | 18 | -4.50252   |
| 7 | 6 | 6 | -11.37125 | 5 | 3 | 1 | 1 | 5.70177    | 15 | 15 | 8  | 5  | 5.89798    | 22 | 19 | 19 | 19 | 5.98808    |
| 7 | 7 | 1 | 59.31469  | 5 | 3 | 3 | 1 | 8.17866    | 15 | 15 | 8  | 6  | 3.62658    | 22 | 20 | 1  | 1  | 20.93314   |
| 7 | 7 | 2 | 145.19418 | 5 | 3 | 3 | 2 | -4.96214   | 15 | 15 | 8  | 7  | 2.10199    | 22 | 20 | 2  | 2  | 10.78879   |
| 7 | 7 | 3 | -4.91192  | 5 | 3 | 3 | 3 | -29.54815  | 15 | 15 | 8  | 8  | 24.62297   | 22 | 20 | 4  | 4  | 1.23805    |
| 7 | 7 | 4 | -3.55712  | 5 | 4 | 1 | 1 | -0.27061   | 15 | 15 | 9  | 1  | 1.17675    | 22 | 20 | 5  | 5  | 7.61090    |
| 7 | 7 | 5 | -8.81431  | 5 | 4 | 2 | 2 | 2.44102    | 15 | 15 | 9  | 2  | -1.83036   | 22 | 20 | 6  | 6  | 0.35018    |
| 7 | 7 | 6 | -32.82692 | 5 | 4 | 3 | 3 | 2.73074    | 15 | 15 | 9  | 3  | 8.93607    | 22 | 20 | 7  | 7  | -2.93359   |
| 7 | 7 | 7 | -9.66546  | 5 | 4 | 4 | 1 | -0.26656   | 15 | 15 | 9  | 4  | 0.50639    | 22 | 20 | 8  | 8  | -6.51854   |
| 8 | 1 | 1 | -3.08477  | 5 | 4 | 4 | 2 | -0.37615   | 15 | 15 | 9  | 5  | -5.75359   | 22 | 20 | 9  | 9  | -4.93643   |
| 8 | 2 | 1 | -1.46263  | 5 | 4 | 4 | 3 | 5.83886    | 15 | 15 | 9  | 6  | -2.81775   | 22 | 20 | 10 | 10 | -2.46640   |
| 8 | 2 | 2 | -6.65092  | 5 | 4 | 4 | 4 | -1.81064   | 15 | 15 | 9  | 7  | -4.14397   | 22 | 20 | 11 | 11 | -3.53821   |
| 8 | 3 | 1 | -40.71898 | 5 | 5 | 1 | 1 | -3.74966   | 15 | 15 | 9  | 8  | -18.11875  | 22 | 20 | 12 | 12 | -1.83290   |
| 8 | 3 | 2 | 18.68488  | 5 | 5 | 2 | 1 | 0.61851    | 15 | 15 | 9  | 9  | 10.65157   | 22 | 20 | 14 | 14 | -2.95913   |
| 8 | 3 | 3 | -53.88388 | 5 | 5 | 2 | 2 | -2.26381   | 15 | 15 | 10 | 10 | 71.13966   | 22 | 20 | 15 | 15 | -5.34974   |
| 8 | 4 | 1 | 8.02205   | 5 | 5 | 3 | 1 | -5.07263   | 15 | 15 | 11 | 10 | -49.89537  | 22 | 20 | 16 | 16 | -6.79471   |
| 8 | 4 | 2 | 8.01324   | 5 | 5 | 3 | 2 | 3.01595    | 15 | 15 | 11 | 11 | 105.56268  | 22 | 20 | 17 | 17 | 16.91029   |
| 8 | 4 | 3 | 25.57539  | 5 | 5 | 3 | 3 | 32.25405   | 15 | 15 | 12 | 10 | 30.91445   | 22 | 20 | 18 | 18 | 15.52372   |
| 8 | 4 | 4 | 31.56256  | 5 | 5 | 4 | 1 | 1.11341    | 15 | 15 | 12 | 11 | 17.77577   | 22 | 20 | 19 | 19 | 8.47305    |
| 8 | 5 | 1 | 25.03214  | 5 | 5 | 4 | 2 | -3.84760   | 15 | 15 | 12 | 12 | 36.47965   | 22 | 20 | 20 | 17 | -0.42792   |
| 8 | 5 | 2 | -8.39102  | 5 | 5 | 4 | 3 | 0.56567    | 15 | 15 | 13 | 10 | -56.80544  | 22 | 20 | 20 | 18 | -0.63553   |
| 8 | 5 | 3 | 61.52082  | 5 | 5 | 4 | 4 | 36.64417   | 15 | 15 | 13 | 11 | 48.42666   | 22 | 20 | 20 | 19 | 5.32376    |
| 8 | 5 | 4 | -16.33597 | 5 | 5 | 5 | 1 | 2.57280    | 15 | 15 | 13 | 12 | -17.16409  | 22 | 20 | 20 | 20 | 6.62127    |
| 8 | 5 | 5 | 33.38562  | 5 | 5 | 5 | 2 | 0.49821    | 15 | 15 | 13 | 13 | 50.76683   | 22 | 21 | 1  | 1  | -11.03279  |
| 8 | 6 | 1 | 21.34076  | 5 | 5 | 5 | 3 | 12.49958   | 15 | 15 | 14 | 14 | 78.33491   | 22 | 21 | 2  | 2  | -29.69788  |
| 8 | 6 | 2 | -14.22674 | 5 | 5 | 5 | 4 | -20.01590  | 15 | 15 | 15 | 14 | 45.30529   | 22 | 21 | 3  | 3  | 3.02127    |
| 8 | 6 | 3 | -23.97375 | 5 | 5 | 5 | 5 | 123.00577  | 15 | 15 | 15 | 15 | 191.90533  | 22 | 21 | 4  | 4  | 7.76825    |
| 8 | 6 | 4 | 4.01773   | 6 | 1 | 1 | 1 | 14.44686   | 16 | 14 | 1  | 1  | 34.51360   | 22 | 21 | 5  | 5  | 2.94861    |
| 8 | 6 | 5 | 29.59704  | 6 | 2 | 1 | 1 | -2.73576   | 16 | 14 | 2  | 2  | 75.19676   | 22 | 21 | 6  | 6  | 1.63334    |
| 8 | 6 | 6 | 21.58790  | 6 | 2 | 2 | 1 | 7.71271    | 16 | 14 | 3  | 3  | -3.95768   | 22 | 21 | 7  | 7  | 11.38453   |
| 8 | 7 | 1 | 10.60191  | 6 | 2 | 2 | 2 | 15.23947   | 16 | 14 | 4  | 4  | -10.27834  | 22 | 21 | 8  | 8  | 3.00468    |
| 8 | 7 | 2 | -16.49061 | 6 | 3 | 1 | 1 | 6.49375    | 16 | 14 | 5  | 5  | -11.11440  | 22 | 21 | 9  | 9  | 2.57136    |
| 8 | 7 | 3 | 21.88768  | 6 | 3 | 2 | 2 | 0.74006    | 16 | 14 | 6  | 6  | -4.72824   | 22 | 21 | 10 | 10 | 1.68246    |
| 8 | 7 | 4 | 10.42938  | 6 | 3 | 3 | 1 | -5.16570   | 16 | 14 | 7  | 7  | -12.24718  | 22 | 21 | 11 | 11 | 3.66948    |
| 8 | 7 | 5 | -3.43762  | 6 | 3 | 3 | 2 | 2.83502    | 16 | 14 | 8  | 8  | -4.90605   | 22 | 21 | 12 | 12 | 3.35354    |
| 8 | 7 | 6 | 5.31434   | 6 | 3 | 3 | 3 | 17.81739   | 16 | 14 | 9  | 9  | -1.27473   | 22 | 21 | 13 | 13 | 1.68219    |
| 8 | 7 | 7 | 6.60601   | 6 | 4 | 1 | 1 | -2.16188   | 16 | 14 | 10 | 10 | -21.26994  | 22 | 21 | 14 | 14 | 4.44229    |
| 8 | 8 | 1 | 144.85306 | 6 | 4 | 2 | 2 | 1.79961    | 16 | 14 | 11 | 11 | -33.84530  | 22 | 21 | 15 | 15 | 7.11438    |
| 8 | 8 | 2 | -54.39891 | 6 | 4 | 3 | 3 | -3.15782   | 16 | 14 | 12 | 12 | -36.35632  | 22 | 21 | 16 | 16 | 2.32611    |
| 8 | 8 | 3 | -21.52290 | 6 | 4 | 4 | 1 | -2.25127   | 16 | 14 | 13 | 13 | -5.25239   | 22 | 21 | 17 | 17 | -19.19968  |
| 8 | 8 | 4 | 7.07091   | 6 | 4 | 4 | 2 | -4.06698   | 16 | 14 | 14 | 14 | -42.62392  | 22 | 21 | 18 | 18 | -21.75017  |
| 8 | 8 | 5 | 8.42365   | 6 | 4 | 4 | 3 | -4.51710   | 16 | 15 | 1  | 1  | 38.84298   | 22 | 21 | 19 | 19 | 5.97385    |
| 8 | 8 | 6 | -17.19276 | 6 | 4 | 4 | 4 | -1.43359   | 16 | 15 | 2  | 2  | -56.12757  | 22 | 21 | 20 | 20 | 0.89561    |
| 8 | 8 | 7 | 11.90855  | 6 | 5 | 1 | 1 | -3.68965   | 16 | 15 | 3  | 3  | -2.14200   | 22 | 21 | 21 | 17 | -0.10203   |
| 8 | 8 | 8 | -16.07119 | 6 | 5 | 2 | 2 | -0.76371   | 16 | 15 | 4  | 4  | 4.86915    | 22 | 21 | 21 | 18 | -0.10541   |
| 9 | 1 | 1 | 1.45324   | 6 | 5 | 3 | 3 | -1.58722   | 16 | 15 | 5  | 5  | 3.70611    | 22 | 21 | 21 | 19 | -2.67574   |
| 9 | 2 | 1 | -4.72434  | 6 | 5 | 4 | 4 | 11.66995   | 16 | 15 | 6  | 6  | -0.90349   | 22 | 21 | 21 | 20 | -1.50322   |
| 9 | 2 | 2 | -15.72548 | 6 | 5 | 5 | 1 | -2.18705   | 16 | 15 | 7  | 7  | 9.14389    | 22 | 21 | 21 | 21 | 3.53790    |
| 9 | 3 | 1 | 50.82845  | 6 | 5 | 5 | 2 | -0.58554   | 16 | 15 | 8  | 8  | -6.11212   | 22 | 22 | 1  | 1  | -22.86805  |
| 9 | 3 | 2 | -7.92822  | 6 | 5 | 5 | 3 | 12.49163   | 16 | 15 | 9  | 9  | -1.94247   | 22 | 22 | 2  | 1  | -16.25862  |
| 9 | 3 | 3 | 7.98708   | 6 | 5 | 5 | 4 | 19.31759   | 16 | 15 | 10 | 10 | -2.32792   | 22 | 22 | 2  | 2  | -59.63966  |
| 9 | 4 | 1 | -2.54300  | 6 | 5 | 5 | 5 | 25.32086   | 16 | 15 | 11 | 11 | -10.31689  | 22 | 22 | 3  | 1  | -0.70164   |
| 9 | 4 | 2 | 22.28385  | 6 | 6 | 1 | 1 | -0.27671   | 16 | 15 | 12 | 12 | 30.23930   | 22 | 22 | 3  | 2  | 1.76063    |
| 9 | 4 | 3 | 13.08396  | 6 | 6 | 2 | 1 | 1.01286    | 16 | 15 | 13 | 13 | -11.26311  | 22 | 22 | 3  | 3  | -1.34071   |
| 9 | 4 | 4 | -10.66570 | 6 | 6 | 2 | 2 | 0.42729    | 16 | 15 | 14 | 14 | 22.72585   | 22 | 22 | 4  | 1  | 0.33850    |
| 9 | 5 | 1 | -26.47053 | 6 | 6 | 3 | 1 | 1.09291    | 16 | 15 | 15 | 14 | -52.78342  | 22 | 22 | 4  | 3  | -2.90251   |
| 9 | 5 | 2 | 9.11072   | 6 | 6 | 3 | 2 | 0.86427    | 16 | 15 | 15 | 15 | -20.28920  | 22 | 22 | 4  | 4  | 4.19313    |
| 9 | 5 | 3 | 3.76389   | 6 | 6 | 3 | 3 | 14.02322   | 16 | 16 | 1  | 1  | -22.57351  | 22 | 22 | 5  | 2  | -1.62376   |
| 9 | 5 | 4 | -18.47489 | 6 | 6 | 4 | 1 | 2.28843    | 16 | 16 | 2  | 1  | -15.92223  | 22 | 22 | 5  | 3  | -0.31806   |
| 9 | 5 | 5 | 3.34079   | 6 | 6 | 4 | 2 | 1.38534    | 16 | 16 | 2  | 2  | -57.73929  | 22 | 22 | 5  | 4  | -6.41044   |
| 9 | 6 | 1 | -15.23837 | 6 | 6 | 4 | 3 | 10.88901   | 16 | 16 | 3  | 1  | -1.52762   | 22 | 22 | 5  | 5  | -1.79801   |
| 9 | 6 | 2 | -0.94768  | 6 | 6 | 4 | 4 | 16.04362   | 16 | 16 | 3  | 2  | 3.90360    | 22 | 22 | 6  | 1  | -0.80593   |
| 9 | 6 | 3 | -21.06061 | 6 | 6 | 5 | 1 | -0.63775   | 16 | 16 | 3  | 3  | -10.12822  | 22 | 22 | 6  | 2  | -2.23058   |
| 9 | 6 | 4 | -16.20805 | 6 | 6 | 5 | 2 | -0.50962   | 16 | 16 | 4  | 1  | 0.77571    | 22 | 22 | 6  | 3  | -2.79864   |
| 9 | 6 | 5 | -4.15287  | 6 | 6 | 5 | 3 | 5.76730    | 16 | 16 | 4  | 2  | 2.39757    | 22 | 22 | 6  | 4  | -1.45112   |
| 9 | 6 | 6 | -         |   |   |   |   |            |    |    |    |    |            |    |    |    |    |            |



| I J K   | Fl(I,J,K)  | I J K L | Fl(I,J,K,L) | I J K L     | Fl(I,J,K,L) | I J K L     | Fl(I,J,K,L) |
|---------|------------|---------|-------------|-------------|-------------|-------------|-------------|
| 9 8 2   | 38.68280   | 7 2 1 1 | 4.25647     | 16 16 6 4   | 0.95940     | 22 22 8 1   | 0.56984     |
| 9 8 3   | -5.46503   | 7 2 2 1 | 1.72833     | 16 16 6 5   | 1.86951     | 22 22 8 2   | -0.81781    |
| 9 8 4   | 13.48484   | 7 2 2 2 | 2.73823     | 16 16 6 6   | -7.84295    | 22 22 8 3   | -2.19568    |
| 9 8 5   | 5.40393    | 7 3 1 1 | 2.98637     | 16 16 7 1   | -0.69214    | 22 22 8 4   | 1.86418     |
| 9 8 6   | -9.93006   | 7 3 2 2 | -3.13253    | 16 16 7 2   | -1.43664    | 22 22 8 5   | 2.85738     |
| 9 8 7   | 7.17828    | 7 3 3 1 | 3.98843     | 16 16 7 4   | -5.56998    | 22 22 8 6   | 0.87952     |
| 9 8 8   | 14.42086   | 7 3 3 2 | -1.81379    | 16 16 7 5   | 5.05486     | 22 22 8 7   | -1.05245    |
| 9 9 1   | 62.55625   | 7 3 3 3 | -8.90677    | 16 16 7 7   | 2.54830     | 22 22 8 8   | 5.14877     |
| 9 9 2   | -18.52330  | 7 4 1 1 | 7.19549     | 16 16 8 2   | -1.17355    | 22 22 9 1   | -0.46427    |
| 9 9 3   | -6.31963   | 7 4 2 2 | 53.32005    | 16 16 8 3   | -0.58226    | 22 22 9 2   | 0.95648     |
| 9 9 4   | -8.98823   | 7 4 3 3 | 7.49052     | 16 16 8 4   | 0.52964     | 22 22 9 3   | 0.92959     |
| 9 9 5   | -2.84039   | 7 4 4 1 | -1.07520    | 16 16 8 5   | -1.85427    | 22 22 9 4   | 2.09263     |
| 9 9 6   | -10.79598  | 7 4 4 2 | -2.34922    | 16 16 8 6   | 2.49600     | 22 22 9 5   | -0.96343    |
| 9 9 7   | 1.71823    | 7 4 4 3 | 5.08857     | 16 16 8 7   | -0.95735    | 22 22 9 6   | -0.29781    |
| 9 9 8   | -4.79573   | 7 4 4 4 | -2.67474    | 16 16 8 8   | -1.77577    | 22 22 9 7   | -3.56471    |
| 9 9 9   | -7.19013   | 7 5 1 1 | -2.33693    | 16 16 9 1   | -0.39451    | 22 22 9 8   | -3.45324    |
| 10 10 1 | 108.22255  | 7 5 2 2 | -3.57398    | 16 16 9 2   | -2.31256    | 22 22 9 9   | 1.15075     |
| 10 10 2 | 21.45310   | 7 5 3 3 | 7.23994     | 16 16 9 3   | -1.03747    | 22 22 10 10 | 3.57717     |
| 10 10 3 | 5.68221    | 7 5 4 4 | 4.62688     | 16 16 9 5   | 1.16715     | 22 22 11 10 | 2.09298     |
| 10 10 4 | -12.71120  | 7 5 5 1 | 1.64755     | 16 16 9 6   | 1.76593     | 22 22 11 11 | 5.18818     |
| 10 10 5 | -9.37841   | 7 5 5 2 | -0.42899    | 16 16 9 7   | -1.90396    | 22 22 12 10 | 5.42566     |
| 10 10 6 | 8.39552    | 7 5 5 3 | 1.62841     | 16 16 9 8   | -2.07707    | 22 22 12 11 | 5.66176     |
| 10 10 7 | 0.43106    | 7 5 5 4 | 14.54223    | 16 16 9 9   | 2.31385     | 22 22 12 12 | 4.62437     |
| 10 10 9 | -3.26589   | 7 5 5 5 | 9.10329     | 16 16 10 10 | 19.37610    | 22 22 13 10 | -3.95123    |
| 11 10 1 | -94.91887  | 7 6 1 1 | -2.71210    | 16 16 11 10 | 10.85888    | 22 22 13 11 | -0.48088    |
| 11 10 2 | 116.98489  | 7 6 2 2 | -4.64964    | 16 16 11 11 | 26.32251    | 22 22 13 12 | -2.29402    |
| 11 10 3 | -14.63787  | 7 6 3 3 | -3.17135    | 16 16 12 10 | 17.87131    | 22 22 13 13 | -1.97195    |
| 11 10 4 | 15.43902   | 7 6 4 4 | 1.76872     | 16 16 12 11 | 17.19721    | 22 22 14 14 | 7.36600     |
| 11 10 5 | -4.54850   | 7 6 5 5 | 11.00483    | 16 16 12 12 | 27.94505    | 22 22 15 14 | -4.98560    |
| 11 10 7 | 2.04570    | 7 6 6 1 | 0.62970     | 16 16 13 10 | -10.98414   | 22 22 15 15 | 8.11358     |
| 11 10 8 | 4.52175    | 7 6 6 2 | 0.11371     | 16 16 13 11 | -3.12414    | 22 22 16 14 | -7.63252    |
| 11 10 9 | -5.13076   | 7 6 6 3 | 5.49427     | 16 16 13 12 | -6.90935    | 22 22 16 15 | 3.92479     |
| 11 11 1 | 190.90958  | 7 6 6 4 | 7.79692     | 16 16 13 13 | 11.88627    | 22 22 16 16 | -4.20024    |
| 11 11 2 | 26.67012   | 7 6 6 5 | 6.76293     | 16 16 14 14 | 37.15018    | 22 22 17 17 | -39.50536   |
| 11 11 3 | 0.54551    | 7 6 6 6 | 3.43392     | 16 16 15 14 | -21.07524   | 22 22 18 17 | -24.27332   |
| 11 11 4 | -1.48096   | 7 7 1 1 | -13.81645   | 16 16 15 15 | 44.37981    | 22 22 18 18 | -43.35958   |
| 11 11 5 | -8.97777   | 7 7 2 1 | -33.55499   | 16 16 16 14 | -17.04766   | 22 22 19 17 | 1.05285     |
| 11 11 6 | 10.95219   | 7 7 2 2 | -91.09288   | 16 16 16 15 | 15.48022    | 22 22 19 18 | 1.54188     |
| 11 11 7 | -7.45162   | 7 7 3 1 | 0.36617     | 16 16 16 16 | 53.33090    | 22 22 19 19 | 3.86312     |
| 11 11 8 | -15.45624  | 7 7 3 2 | 3.73660     | 17 17 1 1   | 150.89565   | 22 22 20 17 | -1.00271    |
| 11 11 9 | 2.00091    | 7 7 3 3 | 4.55563     | 17 17 2 1   | -6.94049    | 22 22 20 18 | -1.67560    |
| 12 10 1 | 54.09330   | 7 7 4 1 | 1.55429     | 17 17 2 2   | 136.95590   | 22 22 20 19 | 3.94277     |
| 12 10 2 | 92.44524   | 7 7 4 2 | 3.34651     | 17 17 3 1   | 6.68886     | 22 22 20 20 | 5.02282     |
| 12 10 3 | -0.93534   | 7 7 4 3 | 1.91562     | 17 17 3 2   | -12.92080   | 22 22 21 17 | -0.53730    |
| 12 10 4 | -6.05890   | 7 7 4 4 | 12.60732    | 17 17 3 3   | -10.39245   | 22 22 21 18 | 0.14495     |
| 12 10 5 | 7.70319    | 7 7 5 1 | -0.45367    | 17 17 4 1   | -13.10685   | 22 22 21 19 | -2.32970    |
| 12 10 6 | -2.74898   | 7 7 5 2 | -2.85794    | 17 17 4 2   | -1.04867    | 22 22 21 20 | -1.03925    |
| 12 10 7 | 5.54574    | 7 7 5 3 | 0.73583     | 17 17 4 3   | 3.45292     | 22 22 21 21 | 2.31934     |
| 12 10 8 | 2.34189    | 7 7 5 4 | 1.91102     | 17 17 4 4   | -15.25278   | 22 22 22 17 | 0.31549     |
| 12 11 1 | 24.86551   | 7 7 5 5 | 5.57632     | 17 17 5 1   | -3.83405    | 22 22 22 18 | 1.00862     |
| 12 11 2 | 126.90759  | 7 7 6 1 | -1.91892    | 17 17 5 2   | 2.17748     | 22 22 22 19 | -4.35197    |
| 12 11 3 | 1.40489    | 7 7 6 2 | -4.71085    | 17 17 5 3   | 4.74554     | 22 22 22 20 | -1.35022    |
| 12 11 4 | -16.76109  | 7 7 6 3 | 1.45336     | 17 17 5 5   | -4.08585    | 22 22 22 21 | 7.03128     |
| 12 11 5 | 16.40513   | 7 7 6 5 | 3.68280     | 17 17 6 1   | 12.44560    | 22 22 22 22 | 13.84032    |
| 12 11 6 | 3.28643    | 7 7 6 6 | 3.92563     | 17 17 6 2   | 4.87475     | 23 17 1 1   | 0.78795     |
| 12 11 7 | -2.53177   | 7 7 7 2 | -0.28779    | 17 17 6 3   | 2.26363     | 23 17 2 2   | -2.69560    |
| 12 11 8 | 1.76938    | 7 7 7 3 | 0.31084     | 17 17 6 4   | -1.22745    | 23 17 3 3   | 3.16269     |
| 12 11 9 | 5.69365    | 7 7 7 4 | -19.47470   | 17 17 6 5   | -1.31037    | 23 17 4 4   | 1.07253     |
| 12 12 1 | 59.57718   | 7 7 7 5 | 5.68242     | 17 17 6 6   | 0.43647     | 23 17 5 5   | 1.71422     |
| 12 12 2 | 154.68073  | 7 7 7 6 | 3.44982     | 17 17 7 1   | -0.81976    | 23 17 6 6   | 0.53637     |
| 12 12 3 | 3.15790    | 7 7 7 7 | 38.63498    | 17 17 7 2   | 5.24308     | 23 17 7 7   | 0.89018     |
| 12 12 4 | 1.49229    | 8 1 1 1 | -3.41128    | 17 17 7 3   | 1.33092     | 23 17 10 10 | -1.59506    |
| 12 12 5 | 9.74045    | 8 2 1 1 | 3.66872     | 17 17 7 4   | 27.80817    | 23 17 11 11 | 1.86523     |
| 12 12 6 | 13.25404   | 8 2 2 1 | -1.39041    | 17 17 7 5   | -3.43911    | 23 17 12 12 | 0.20894     |
| 12 12 7 | 9.82449    | 8 2 2 2 | 3.78606     | 17 17 7 6   | -3.62590    | 23 17 13 13 | -0.84740    |
| 12 12 9 | 4.85923    | 8 3 1 1 | 37.65735    | 17 17 7 7   | -48.06432   | 23 17 14 14 | -2.01207    |
| 13 10 1 | -120.54717 | 8 3 2 2 | 5.81518     | 17 17 8 1   | 3.68963     | 23 17 15 15 | 0.60859     |
| 13 10 2 | 8.86253    | 8 3 3 1 | 0.77125     | 17 17 8 2   | 1.22890     | 23 17 16 16 | -0.25820    |
| 13 10 3 | 18.50686   | 8 3 3 2 | 0.89499     | 17 17 8 3   | 23.06525    | 23 17 17 17 | 4.25783     |
| 13 10 4 | -39.47108  | 8 3 3 3 | 15.53749    | 17 17 8 4   | -6.47080    | 23 18 1 1   | 1.94555     |
| 13 10 5 | 4.57540    | 8 4 1 1 | -7.33743    | 17 17 8 5   | -12.09010   | 23 18 2 2   | -1.72505    |
| 13 10 6 | 10.58540   | 8 4 2 2 | -5.48646    | 17 17 8 6   | -7.85600    | 23 18 3 3   | -3.82569    |
| 13 10 7 | -7.20960   | 8 4 3 3 | -2.91588    | 17 17 8 7   | -2.08392    | 23 18 4 4   | -0.64954    |
| 13 10 8 | 1.71665    | 8 4 4 1 | -0.06468    | 17 17 8 8   | -54.88164   | 23 18 5 5   | -0.85632    |
| 13 10 9 | 2.21004    | 8 4 4 2 | 0.26895     | 17 17 9 1   | -2.58508    | 23 18 6 6   | 0.42386     |
| 13 11 1 | 107.45439  | 8 4 4 3 | 2.18244     | 17 17 9 2   | 3.58545     | 23 18 10 10 | 0.22578     |
| 13 11 2 | -84.87813  | 8 4 4 4 | 2.48728     | 17 17 9 3   | -12.67272   | 23 18 11 11 | -0.38150    |
| 13 11 3 | -19.40497  | 8 5 1 1 | -20.18846   | 17 17 9 4   | -1.47710    | 23 18 13 13 | 1.32596     |
| 13 11 4 | -42.05010  | 8 5 2 2 | -2.76276    | 17 17 9 5   | 7.62825     | 23 18 14 14 | 0.70974     |
| 13 11 5 | 39.96065   | 8 5 3 3 | -10.49338   | 17 17 9 6   | 4.63128     | 23 18 15 15 | 1.88899     |
| 13 11 6 | -5.44329   | 8 5 4 4 | -4.46843    | 17 17 9 7   | 10.41414    | 23 18 17 17 | -3.19793    |
| 13 11 7 | 5.30097    | 8 5 5 1 | 0.41905     | 17 17 9 8   | 30.94650    | 23 18 18 17 | -0.39014    |
| 13 11 8 | -4.25345   | 8 5 5 2 | 1.84784     | 17 17 9 9   | -20.17739   | 23 18 18 18 | -1.69209    |
| 13 12 1 | -28.94220  | 8 5 5 3 | 7.08161     | 17 17 10 10 | -51.95625   | 23 19 1 1   | 19.32168    |
| 13 12 2 | -45.28179  | 8 5 5 4 | -5.87515    | 17 17 11 10 | 21.45440    | 23 19 2 2   | 17.74660    |
| 13 12 4 | 11.88968   | 8 5 5 5 | -9.07676    | 17 17 11 11 | -78.30291   | 23 19 3 3   | 2.15102     |
| 13 12 5 | 20.16336   | 8 6 1 1 | -12.39407   | 17 17 12 10 | -32.36446   | 23 19 4 4   | 4.21244     |
| 13 12 6 | 9.07395    | 8 6 2 2 | -1.34186    | 17 17 12 11 | -26.07991   | 23 19 5 5   | -0.12484    |
| 13 12 7 | 19.56844   | 8 6 3 3 | 3.15559     | 17 17 12 12 | -45.96276   | 23 19 6 6   | 6.28172     |
| 13 12 8 | -13.44313  | 8 6 4 4 | -3.28824    | 17 17 13 10 | 36.57840    | 23 19 7 7   | -4.41294    |









| I  | J  | K  | Fl(I,J,K) | I  | J  | K  | L  | Fl(I,J,,K,L) | I  | J  | K  | L  | Fl(I,J,K,L) | I  | J  | K  | L  | Fl(I,J,K,L) |
|----|----|----|-----------|----|----|----|----|--------------|----|----|----|----|-------------|----|----|----|----|-------------|
| 23 | 20 | 2  | -30.67675 | 13 | 12 | 7  | 7  | -5.16830     | 21 | 19 | 11 | 11 | -1.60102    | 24 | 24 | 9  | 2  | -0.25300    |
| 23 | 20 | 3  | -40.13278 | 13 | 12 | 9  | 9  | 0.45912      | 21 | 19 | 12 | 12 | -1.62439    | 24 | 24 | 9  | 3  | 1.31834     |
| 23 | 20 | 4  | -16.45730 | 13 | 12 | 10 | 10 | -9.89125     | 21 | 19 | 13 | 13 | -0.38722    | 24 | 24 | 9  | 4  | 1.06156     |
| 23 | 20 | 5  | 4.10550   | 13 | 12 | 11 | 11 | -10.42580    | 21 | 19 | 14 | 14 | -1.60799    | 24 | 24 | 9  | 6  | -0.90319    |
| 23 | 20 | 6  | 29.73623  | 13 | 12 | 12 | 10 | -10.20075    | 21 | 19 | 16 | 16 | -2.56868    | 24 | 24 | 9  | 7  | -2.11685    |
| 23 | 20 | 7  | -13.46277 | 13 | 12 | 12 | 11 | -9.89993     | 21 | 19 | 17 | 17 | 4.78318     | 24 | 24 | 9  | 8  | -3.46593    |
| 23 | 20 | 8  | -10.01601 | 13 | 12 | 12 | 12 | -9.69662     | 21 | 19 | 18 | 18 | 6.48403     | 24 | 24 | 9  | 9  | 3.25112     |
| 23 | 20 | 9  | -14.02407 | 13 | 13 | 1  | 1  | -43.21697    | 21 | 19 | 19 | 17 | -1.22985    | 24 | 24 | 10 | 10 | 0.42088     |
| 23 | 21 | 1  | -16.63294 | 13 | 13 | 2  | 1  | 13.40812     | 21 | 19 | 19 | 18 | -0.71097    | 24 | 24 | 11 | 10 | -0.54908    |
| 23 | 21 | 2  | 32.73730  | 13 | 13 | 2  | 2  | -13.58271    | 21 | 19 | 19 | 19 | 5.84370     | 24 | 24 | 11 | 11 | 2.31098     |
| 23 | 21 | 3  | 11.40578  | 13 | 13 | 3  | 1  | 1.12578      | 21 | 20 | 1  | 1  | 11.04812    | 24 | 24 | 12 | 10 | 3.45376     |
| 23 | 21 | 4  | 4.72723   | 13 | 13 | 3  | 2  | -2.39791     | 21 | 20 | 2  | 2  | 6.42311     | 24 | 24 | 12 | 11 | 2.70910     |
| 23 | 21 | 5  | 1.54838   | 13 | 13 | 3  | 3  | -29.55921    | 21 | 20 | 3  | 3  | -0.88058    | 24 | 24 | 12 | 12 | 2.07918     |
| 23 | 21 | 7  | -3.05065  | 13 | 13 | 4  | 1  | 0.32147      | 21 | 20 | 4  | 4  | 6.24904     | 24 | 24 | 13 | 10 | -3.31468    |
| 23 | 21 | 8  | 12.86448  | 13 | 13 | 4  | 2  | -2.46963     | 21 | 20 | 5  | 5  | -2.05061    | 24 | 24 | 13 | 11 | -0.47824    |
| 23 | 21 | 9  | -7.30825  | 13 | 13 | 4  | 3  | -3.87258     | 21 | 20 | 6  | 6  | 0.82712     | 24 | 24 | 13 | 13 | 4.19674     |
| 23 | 22 | 1  | -31.20773 | 13 | 13 | 4  | 4  | -16.66251    | 21 | 20 | 7  | 7  | 0.82759     | 24 | 24 | 14 | 14 | 2.78393     |
| 23 | 22 | 2  | 60.60035  | 13 | 13 | 5  | 1  | -1.42818     | 21 | 20 | 8  | 8  | -2.91287    | 24 | 24 | 15 | 14 | -2.18266    |
| 23 | 22 | 3  | -4.06965  | 13 | 13 | 5  | 2  | 0.95157      | 21 | 20 | 9  | 9  | -1.09898    | 24 | 24 | 15 | 15 | 5.91724     |
| 23 | 22 | 4  | -9.79464  | 13 | 13 | 5  | 3  | 3.21945      | 21 | 20 | 10 | 10 | -1.12449    | 24 | 24 | 16 | 14 | -2.80169    |
| 23 | 22 | 5  | -6.71073  | 13 | 13 | 5  | 4  | -3.46095     | 21 | 20 | 11 | 11 | -1.80658    | 24 | 24 | 16 | 16 | -2.21811    |
| 23 | 22 | 6  | 0.83726   | 13 | 13 | 5  | 5  | -24.38878    | 21 | 20 | 12 | 12 | -1.52795    | 24 | 24 | 17 | 17 | -15.98686   |
| 23 | 22 | 7  | 4.30070   | 13 | 13 | 6  | 1  | -1.19347     | 21 | 20 | 14 | 14 | -1.38797    | 24 | 24 | 18 | 17 | -5.96759    |
| 23 | 22 | 8  | -9.68499  | 13 | 13 | 6  | 2  | 0.27707      | 21 | 20 | 15 | 15 | -2.51966    | 24 | 24 | 18 | 18 | -17.40310   |
| 23 | 22 | 9  | -16.45389 | 13 | 13 | 6  | 3  | -10.83261    | 21 | 20 | 16 | 16 | -2.41217    | 24 | 24 | 19 | 17 | 1.16309     |
| 23 | 23 | 1  | 117.88793 | 13 | 13 | 6  | 4  | -3.47469     | 21 | 20 | 17 | 17 | 8.33659     | 24 | 24 | 19 | 19 | -1.53446    |
| 23 | 23 | 2  | -13.22874 | 13 | 13 | 6  | 5  | -7.06107     | 21 | 20 | 18 | 18 | 8.44872     | 24 | 24 | 20 | 17 | -1.29660    |
| 23 | 23 | 3  | 21.62158  | 13 | 13 | 6  | 6  | -14.29872    | 21 | 20 | 19 | 19 | 2.21417     | 24 | 24 | 20 | 18 | -0.23549    |
| 23 | 23 | 4  | 27.97548  | 13 | 13 | 7  | 2  | 0.96567      | 21 | 20 | 20 | 17 | 2.47734     | 24 | 24 | 20 | 20 | -0.19959    |
| 23 | 23 | 5  | -14.31672 | 13 | 13 | 7  | 4  | -4.16445     | 21 | 20 | 20 | 18 | 0.81889     | 24 | 24 | 21 | 17 | 0.29431     |
| 23 | 23 | 6  | -24.63568 | 13 | 13 | 7  | 5  | -8.34051     | 21 | 20 | 20 | 19 | 1.71943     | 24 | 24 | 21 | 20 | -1.09675    |
| 23 | 23 | 7  | 26.70420  | 13 | 13 | 7  | 6  | -1.87223     | 21 | 20 | 20 | 20 | -6.10254    | 24 | 24 | 21 | 21 | -1.39372    |
| 23 | 23 | 8  | 7.87544   | 13 | 13 | 7  | 7  | -4.89016     | 21 | 21 | 1  | 1  | -6.83154    | 24 | 24 | 22 | 19 | -2.98719    |
| 23 | 23 | 9  | 6.26367   | 13 | 13 | 8  | 1  | 0.40636      | 21 | 21 | 2  | 1  | -3.98065    | 24 | 24 | 22 | 20 | -1.35844    |
| 24 | 14 | 10 | 4.02255   | 13 | 13 | 8  | 2  | -0.50242     | 21 | 21 | 2  | 2  | -16.17133   | 24 | 24 | 22 | 21 | 5.38399     |
| 24 | 14 | 11 | 1.82994   | 13 | 13 | 8  | 3  | -7.21442     | 21 | 21 | 3  | 1  | 0.58939     | 24 | 24 | 22 | 22 | 5.92106     |
| 24 | 14 | 12 | -1.32755  | 13 | 13 | 8  | 4  | 1.61621      | 21 | 21 | 3  | 2  | -1.24624    | 24 | 24 | 23 | 17 | 0.27193     |
| 24 | 14 | 13 | -3.82617  | 13 | 13 | 8  | 5  | 6.63318      | 21 | 21 | 3  | 3  | -6.21524    | 24 | 24 | 23 | 18 | 0.33239     |
| 24 | 15 | 10 | 5.66165   | 13 | 13 | 8  | 7  | 2.59712      | 21 | 21 | 4  | 1  | 0.26925     | 24 | 24 | 23 | 19 | -2.66839    |
| 24 | 15 | 11 | 4.22400   | 13 | 13 | 8  | 8  | -2.06119     | 21 | 21 | 4  | 2  | 1.93766     | 24 | 24 | 23 | 20 | 1.49655     |
| 24 | 15 | 13 | 8.83905   | 13 | 13 | 9  | 1  | 1.08908      | 21 | 21 | 4  | 3  | 0.42974     | 24 | 24 | 23 | 21 | 1.15374     |
| 24 | 16 | 10 | -4.35392  | 13 | 13 | 9  | 3  | 0.86090      | 21 | 21 | 4  | 4  | -3.71206    | 24 | 24 | 23 | 22 | 2.35497     |
| 24 | 16 | 11 | -4.09128  | 13 | 13 | 9  | 4  | -0.56706     | 21 | 21 | 5  | 1  | -1.04522    | 24 | 24 | 23 | 23 | 6.61480     |
| 24 | 16 | 12 | 2.08795   | 13 | 13 | 9  | 5  | 1.15440      | 21 | 21 | 5  | 2  | -2.28064    | 24 | 24 | 24 | 17 | -0.34254    |
| 24 | 16 | 13 | 11.05833  | 13 | 13 | 9  | 8  | -4.61107     | 21 | 21 | 5  | 3  | -1.69959    | 24 | 24 | 24 | 18 | 0.58225     |
| 24 | 17 | 1  | -6.62970  | 13 | 13 | 9  | 9  | -2.25039     | 21 | 21 | 5  | 4  | 4.07812     | 24 | 24 | 24 | 19 | 3.19530     |
| 24 | 17 | 2  | 3.73772   | 13 | 13 | 10 | 10 | 30.91093     | 21 | 21 | 5  | 5  | -11.70426   | 24 | 24 | 24 | 20 | 0.55743     |
| 24 | 17 | 3  | 8.77105   | 13 | 13 | 11 | 10 | -18.74849    | 21 | 21 | 6  | 1  | 0.37279     | 24 | 24 | 24 | 21 | -1.88207    |
| 24 | 17 | 4  | 39.14348  | 13 | 13 | 11 | 11 | 27.51931     | 21 | 21 | 6  | 3  | -0.24388    | 24 | 24 | 24 | 22 | -3.79789    |
| 24 | 17 | 5  | -10.76076 | 13 | 13 | 12 | 10 | 3.10070      | 21 | 21 | 6  | 4  | -0.61636    | 24 | 24 | 24 | 23 | -4.63628    |
| 24 | 17 | 6  | -10.62285 | 13 | 13 | 12 | 11 | -1.09967     | 21 | 21 | 6  | 5  | -0.89907    | 24 | 24 | 24 | 24 | 8.06705     |
| 24 | 17 | 7  | -57.94551 | 13 | 13 | 12 | 12 | 7.53907      | 21 | 21 | 6  | 6  | -1.05654    |    |    |    |    |             |
| 24 | 17 | 8  | -39.58356 | 13 | 13 | 13 | 10 | -9.23371     | 21 | 21 | 7  | 1  | -0.57940    |    |    |    |    |             |

Table S38: The quartic potential energy surface of Pyrazine. The calculation was done by using B3LYP/6-311++G(2d,2p) method. The force constant (FIs) are in cm<sup>-1</sup> units.

| I J   | F(I,J)     | I J K    | FI(I,J,K)   | I J K L     | F(I,I,J,K,L) | I J K L     | FI(I,J,K,L) |
|-------|------------|----------|-------------|-------------|--------------|-------------|-------------|
| 1 1   | 3176.08814 | 23 20 6  | -19.48348   | 14 13 5 5   | 1.95702      | 20 20 5 3   | 4.30058     |
| 2 2   | 1612.14157 | 23 20 7  | 16.77279    | 14 13 6 6   | 41.28632     | 20 20 5 4   | 5.42038     |
| 3 3   | 1253.07407 | 23 21 6  | 6.62780     | 14 13 7 7   | 17.16455     | 20 20 5 5   | -10.04325   |
| 4 4   | 1038.99428 | 23 21 7  | 21.16995    | 14 13 8 8   | 45.04839     | 20 20 6 6   | -2.83726    |
| 5 5   | 615.06995  | 23 22 6  | -7.36216    | 14 13 9 9   | -52.31181    | 20 20 7 6   | 4.26708     |
| 6 6   | 1005.85091 | 23 22 7  | 20.88517    | 14 13 10 10 | 5.57994      | 20 20 7 7   | -11.81120   |
| 7 7   | 351.46148  | 23 23 1  | 521.71065   | 14 13 11 11 | 2.66530      | 20 20 8 8   | -1.49770    |
| 8 8   | 944.94234  | 23 23 2  | -7.16690    | 14 13 13 13 | 43.81198     | 20 20 9 9   | -17.77247   |
| 9 9   | 3156.26226 | 23 23 3  | 11.60115    | 14 14 1 1   | -16.13637    | 20 20 10 9  | 3.17624     |
| 10 10 | 1518.68368 | 23 23 4  | -9.29001    | 14 14 2 1   | -0.28175     | 20 20 10 10 | 17.89902    |
| 11 11 | 1164.79526 | 23 23 5  | -8.36496    | 14 14 2 2   | -11.42264    | 20 20 11 9  | -2.29489    |
| 12 12 | 1037.75285 | 24 13 9  | -68.66218   | 14 14 3 1   | 0.72942      | 20 20 11 10 | 11.10921    |
| 13 13 | 993.16846  | 24 13 10 | 39.37224    | 14 14 3 2   | -6.10386     | 20 20 11 11 | 14.22026    |
| 14 14 | 778.39961  | 24 13 11 | -16.02030   | 14 14 3 3   | -4.80632     | 20 20 12 9  | -2.38698    |
| 15 15 | 3170.19334 | 24 13 12 | 10.84001    | 14 14 4 1   | -0.73503     | 20 20 12 10 | 9.27190     |
| 16 16 | 1445.53416 | 24 14 9  | -16.12906   | 14 14 4 3   | -1.88047     | 20 20 12 11 | 16.00858    |
| 17 17 | 1208.13429 | 24 14 10 | -22.12704   | 14 14 4 4   | -5.28124     | 20 20 12 12 | 0.26102     |
| 18 18 | 1089.51389 | 24 14 11 | -40.11031   | 14 14 5 1   | -0.32784     | 20 20 13 13 | -3.28044    |
| 19 19 | 3155.11452 | 24 14 12 | -17.23457   | 14 14 5 2   | 0.64339      | 20 20 14 13 | 4.47155     |
| 20 20 | 1575.70792 | 24 15 8  | -68.61270   | 14 14 5 3   | 1.86799      | 20 20 14 14 | -15.15166   |
| 21 21 | 1378.75825 | 24 16 8  | -31.19556   | 14 14 5 4   | -0.84639     | 20 20 15 15 | -17.93490   |
| 22 22 | 720.69536  | 24 17 8  | -58.37750   | 14 14 5 5   | -1.12287     | 20 20 16 15 | -2.46734    |
| 23 23 | 803.60623  | 24 18 8  | 9.18427     | 14 14 6 6   | 7.48895      | 20 20 16 16 | 0.35483     |
| 24 24 | 433.76816  | 24 19 6  | -65.40121   | 14 14 7 6   | 5.45743      | 20 20 17 15 | -0.29495    |
|       |            | 24 19 7  | -51.33849   | 14 14 7 7   | 10.05052     | 20 20 17 16 | -6.94495    |
|       |            | 24 20 6  | 22.20977    | 14 14 8 8   | 10.74726     | 20 20 17 17 | 50.94295    |
|       |            | 24 20 7  | -66.54924   | 14 14 9 9   | -16.28887    | 20 20 18 15 | 5.49530     |
| 1 1 1 | -972.81427 | 24 21 6  | 23.39504    | 14 14 10 9  | 0.65566      | 20 20 18 16 | -7.46684    |
| 2 1 1 | -44.11559  | 24 21 7  | 47.89546    | 14 14 10 10 | -4.74450     | 20 20 18 17 | -8.49421    |
| 2 2 1 | 91.14069   | 24 22 6  | -2.89596    | 14 14 11 9  | -0.21131     | 20 20 18 18 | -4.01639    |
| 2 2 2 | -120.60160 | 24 22 7  | 3.63596     | 14 14 11 10 | -4.21339     | 20 20 19 19 | -17.73418   |
| 3 1 1 | 10.79162   | 24 23 1  | -76.18715   | 14 14 11 11 | -6.23406     | 20 20 20 19 | 3.28421     |
| 3 2 1 | -79.38117  | 24 23 2  | -57.13303   | 14 14 12 9  | 0.39203      | 20 20 20 20 | 32.03686    |
| 3 2 2 | -25.80729  | 24 23 3  | 29.18663    | 14 14 12 10 | -2.65578     | 21 19 1 1   | -4.15204    |
| 3 3 1 | 121.58611  | 24 23 4  | -13.20787   | 14 14 12 11 | -1.85927     | 21 19 2 2   | 3.23488     |
| 3 3 2 | -9.67520   | 24 23 5  | -9.54679    | 14 14 12 12 | -2.95379     | 21 19 3 3   | -0.79773    |
| 3 3 3 | 18.09526   | 24 24 1  | 11.71838    | 14 14 13 13 | 9.89366      | 21 19 4 4   | 0.43629     |
| 4 1 1 | 20.47227   | 24 24 2  | -55.06642   | 14 14 14 13 | 3.83195      | 21 19 6 6   | 0.35371     |
| 4 2 1 | 22.30109   | 24 24 3  | -51.20560   | 14 14 14 14 | -2.54513     | 21 19 7 7   | -1.72733    |
| 4 2 2 | 157.72882  | 24 24 4  | -65.01077   | 15 15 1 1   | 273.28203    | 21 19 8 8   | -3.32329    |
| 4 3 1 | -44.78281  |          |             | 15 15 2 1   | 13.48138     | 21 19 9 9   | -1.35609    |
| 4 3 2 | 71.38025   | I J K L  | FI(I,J,K,L) | 15 15 2 2   | -41.64195    | 21 19 10 10 | 3.32102     |
| 4 3 3 | 64.84062   |          |             | 15 15 3 1   | -7.88595     | 21 19 11 11 | -6.56294    |
| 4 4 1 | 25.39190   | 1 1 1 1  | 273.15460   | 15 15 3 2   | 54.22245     | 21 19 12 12 | 1.58527     |
| 4 4 2 | -15.34264  | 2 1 1 1  | 13.74651    | 15 15 3 3   | -73.79494    | 21 19 13 13 | -0.22155    |
| 4 4 3 | 10.24601   | 2 2 1 1  | -40.80870   | 15 15 4 1   | -4.45432     | 21 19 14 14 | 0.38874     |
| 4 4 4 | 113.73222  | 2 2 2 1  | -7.12377    | 15 15 4 2   | -18.27359    | 21 19 15 15 | -4.10149    |
| 5 1 1 | -7.31528   | 2 2 2 2  | 23.92325    | 15 15 4 3   | 23.57784     | 21 19 16 16 | -1.55188    |
| 5 2 1 | -70.50828  | 3 1 1 1  | -7.70337    | 15 15 4 4   | -7.89114     | 21 19 17 17 | 2.12354     |
| 5 2 2 | 5.88404    | 3 2 1 1  | 53.87357    | 15 15 5 1   | -0.74439     | 21 19 18 18 | 2.66860     |
| 5 3 1 | 82.14521   | 3 2 2 1  | 2.10767     | 15 15 5 2   | 26.94659     | 21 19 19 19 | -1.75740    |
| 5 3 2 | 8.56263    | 3 2 2 2  | 5.13270     | 15 15 5 3   | -38.26923    | 21 20 1 1   | -40.01613   |
| 5 3 3 | -22.13599  | 3 3 1 1  | -73.48516   | 15 15 5 4   | 12.02671     | 21 20 2 2   | -0.39091    |
| 5 4 1 | -27.00550  | 3 3 2 1  | -2.04192    | 15 15 5 5   | -20.65455    | 21 20 3 3   | 5.96146     |
| 5 4 2 | -23.34487  | 3 3 2 2  | 13.87224    | 15 15 6 6   | -157.83614   | 21 20 4 4   | -2.01350    |
| 5 4 3 | -7.70907   | 3 3 3 1  | -0.30592    | 15 15 7 6   | -115.09731   | 21 20 5 5   | 5.67650     |
| 5 4 4 | 16.00177   | 3 3 3 2  | -12.94007   | 15 15 7 7   | -83.29531    | 21 20 6 6   | 8.73006     |
| 5 5 1 | 48.97152   | 3 3 3 3  | 26.87884    | 15 15 8 8   | -193.27529   | 21 20 7 7   | 6.49546     |
| 5 5 2 | -33.29003  | 4 1 1 1  | -4.23008    | 15 15 9 9   | 275.78554    | 21 20 8 8   | 11.64828    |
| 5 5 3 | -15.80014  | 4 2 1 1  | -17.84032   | 15 15 10 9  | -2.85381     | 21 20 9 9   | -40.66037   |
| 5 5 4 | 4.92275    | 4 2 2 1  | 1.49034     | 15 15 10 10 | -79.75734    | 21 20 10 10 | 5.34476     |
| 5 5 5 | -6.43581   | 4 2 2 2  | -13.81484   | 15 15 11 9  | 4.18535      | 21 20 11 11 | 1.23235     |
| 6 6 1 | 322.07797  | 4 3 1 1  | 23.40568    | 15 15 11 10 | 54.57054     | 21 20 12 12 | -0.16149    |
| 6 6 2 | -16.32624  | 4 3 2 2  | -6.77347    | 15 15 11 11 | -39.52407    | 21 20 13 13 | 9.77511     |
| 6 6 3 | -15.63272  | 4 3 3 1  | -0.16229    | 15 15 12 9  | -0.62585     | 21 20 14 14 | 4.63577     |
| 6 6 4 | 16.81824   | 4 3 3 2  | 4.61467     | 15 15 12 10 | 26.32739     | 21 20 15 15 | -40.23578   |
| 6 6 5 | -6.44769   | 4 3 3 3  | -8.69546    | 15 15 12 11 | -18.21128    | 21 20 16 16 | 10.76250    |
| 7 6 1 | 269.87962  | 4 4 1 1  | -7.60275    | 15 15 12 12 | -10.84916    | 21 20 17 17 | -14.82450   |
| 7 6 2 | -40.42033  | 4 4 2 1  | -1.49312    | 15 15 13 13 | -174.64800   | 21 20 18 18 | 7.83967     |
| 7 6 3 | -8.19311   | 4 4 2 2  | 18.01036    | 15 15 14 13 | -51.93848    | 21 20 19 19 | -40.49812   |
| 7 6 4 | 17.72391   | 4 4 3 1  | -0.34004    | 15 15 14 14 | -16.27988    | 21 20 20 19 | 4.12675     |
| 7 6 5 | -14.60285  | 4 4 3 2  | 6.43905     | 15 15 15 15 | 274.08888    | 21 20 20 20 | -7.07319    |
| 7 7 1 | 201.68004  | 4 4 3 3  | 8.91781     | 16 15 1 1   | 14.14503     | 21 21 1 1   | -103.95641  |
| 7 7 2 | 45.41130   | 4 4 4 1  | 1.61035     | 16 15 2 2   | -6.38411     | 21 21 2 1   | -0.28025    |
| 7 7 3 | 3.29729    | 4 4 4 2  | -1.87125    | 16 15 3 3   | 0.27279      | 21 21 2 2   | 14.26617    |
| 7 7 4 | -77.09342  | 4 4 4 3  | -1.05254    | 16 15 4 4   | -1.27207     | 21 21 3 1   | -2.00311    |
| 7 7 5 | -36.50116  | 4 4 4 4  | 11.18177    | 16 15 5 5   | -0.62537     | 21 21 3 2   | -19.45059   |
| 8 8 1 | 409.08564  | 5 1 1 1  | -0.22903    | 16 15 6 6   | -2.82755     | 21 21 3 3   | 26.12929    |
| 8 8 2 | 2.04248    | 5 2 1 1  | 27.28959    | 16 15 8 8   | -2.84167     | 21 21 4 1   | -1.66619    |
| 8 8 3 | 16.76819   | 5 2 2 1  | 1.92784     | 16 15 9 9   | 11.85053     | 21 21 4 2   | 7.16097     |
| 8 8 4 | 0.46110    | 5 2 2 2  | -16.36779   | 16 15 10 10 | -3.27323     | 21 21 4 3   | -6.20207    |
| 8 8 5 | 15.36755   | 5 3 1 1  | -38.36622   | 16 15 11 11 | 5.26284      | 21 21 4 4   | 3.14197     |
| 9 8 6 | 365.31974  | 5 3 2 2  | 1.94877     | 16 15 12 12 | -1.05932     | 21 21 5 1   | 0.58788     |
| 9 8 7 | 285.72674  | 5 3 3 1  | 1.58128     | 16 15 13 13 | -2.66789     | 21 21 5 2   | -12.44088   |
| 9 9 1 | -985.00206 | 5 3 3 2  | -11.69248   | 16 15 14 14 | -0.56504     | 21 21 5 3   | 15.69885    |
| 9 9 2 | -40.95226  | 5 3 3 3  | 13.23101    | 16 15 15 15 | 14.25568     | 21 21 5 4   | -4.76275    |









Table S39: The quartic potential energy surface pyrazine-d4. The calculation was done by using B3LYP/6-311++G(2d,2p) method. The force constants (FI) are in  $\text{cm}^{-1}$  units.

| I  | J  | FI(I,J)    | I  | J  | K  | FI(I,J,K)  | I         | J  | K  | L  | FI(I,J,K,L) | I         | J  | K  | L  | I(I,J,K,L) |           |
|----|----|------------|----|----|----|------------|-----------|----|----|----|-------------|-----------|----|----|----|------------|-----------|
|    |    |            | 23 | 21 | 7  | 24.52286   | 14        | 13 | 8  | 8  | -38.67946   | 20        | 20 | 5  | 4  | 0.88128    |           |
|    |    |            | 23 | 22 | 6  | 3.57520    | 14        | 13 | 9  | 9  | 48.39149    | 20        | 20 | 5  | 5  | -10.93266  |           |
| 1  | 1  | 2357.91409 | 23 | 22 | 7  | 23.08771   | 14        | 13 | 10 | 10 | -5.00726    | 20        | 20 | 6  | 6  | -5.13485   |           |
| 2  | 2  | 1569.25300 | 23 | 23 | 1  | 295.24364  | 14        | 13 | 11 | 11 | 0.19139     | 20        | 20 | 7  | 6  | -3.75473   |           |
| 3  | 3  | 1028.76951 | 23 | 23 | 2  | -13.02019  | 14        | 13 | 12 | 12 | -7.39333    | 20        | 20 | 7  | 7  | -10.58360  |           |
| 4  | 4  | 899.05689  | 23 | 23 | 3  | 20.24266   | 14        | 13 | 13 | 13 | -15.99044   | 20        | 20 | 8  | 8  | -4.69362   |           |
| 5  | 5  | 599.50737  | 23 | 23 | 4  | 30.61644   | 14        | 14 | 1  | 1  | -58.53346   | 20        | 20 | 9  | 9  | -4.82455   |           |
| 6  | 6  | 847.41849  | 23 | 23 | 5  | -3.36970   | 14        | 14 | 2  | 1  | -4.60869    | 20        | 20 | 10 | 9  | -3.95841   |           |
| 7  | 7  | 295.09026  | 24 | 13 | 9  | 68.79073   | 14        | 14 | 2  | 2  | -2.30865    | 20        | 20 | 10 | 10 | 29.67068   |           |
| 8  | 8  | 737.61681  | 24 | 13 | 10 | -39.70192  | 14        | 14 | 3  | 1  | -4.29317    | 20        | 20 | 11 | 9  | -2.18407   |           |
| 9  | 9  | 2333.73628 | 24 | 13 | 11 | -8.22024   | 14        | 14 | 3  | 2  | 2.76870     | 20        | 20 | 11 | 10 | 2.86775    |           |
| 10 | 10 | 1384.45684 | 24 | 13 | 12 | 4.13529    | 14        | 14 | 3  | 3  | -2.61679    | 20        | 20 | 11 | 11 | -9.25028   |           |
| 11 | 11 | 1039.25169 | 24 | 14 | 9  | -71.86686  | 14        | 14 | 4  | 1  | 1.15034     | 20        | 20 | 12 | 9  | 1.66702    |           |
| 12 | 12 | 884.91047  | 24 | 14 | 10 | -19.70409  | 14        | 14 | 4  | 2  | -2.19676    | 20        | 20 | 12 | 10 | -15.00334  |           |
| 13 | 13 | 862.59377  | 24 | 14 | 11 | 16.70082   | 14        | 14 | 4  | 3  | -0.47130    | 20        | 20 | 12 | 11 | 1.51315    |           |
| 14 | 14 | 657.19486  | 24 | 14 | 12 | 30.05227   | 14        | 14 | 4  | 4  | 3.01674     | 20        | 20 | 12 | 12 | 9.06318    |           |
| 15 | 15 | 2345.84941 | 24 | 15 | 8  | -96.59902  | 14        | 14 | 5  | 1  | -0.66516    | 20        | 20 | 13 | 13 | -11.92983  |           |
| 16 | 16 | 1289.82853 | 24 | 16 | 8  | -21.04530  | 14        | 14 | 5  | 2  | -2.87953    | 20        | 20 | 14 | 13 | -6.92212   |           |
| 17 | 17 | 1207.79534 | 24 | 17 | 8  | -58.47415  | 14        | 14 | 5  | 3  | -1.78899    | 20        | 20 | 14 | 14 | -8.38449   |           |
| 18 | 18 | 846.46297  | 24 | 18 | 8  | 10.48043   | 14        | 14 | 5  | 4  | 5.82331     | 20        | 20 | 15 | 15 | -5.71454   |           |
| 19 | 19 | 2325.09840 | 24 | 19 | 6  | 83.98003   | 14        | 14 | 5  | 5  | 2.57770     | 20        | 20 | 16 | 15 | 2.46404    |           |
| 20 | 20 | 1558.02069 | 24 | 19 | 7  | -79.97363  | 14        | 14 | 6  | 6  | 33.06683    | 20        | 20 | 16 | 16 | -6.53522   |           |
| 21 | 21 | 1047.81047 | 24 | 20 | 6  | -28.49428  | 14        | 14 | 7  | 6  | -31.75455   | 20        | 20 | 17 | 15 | 3.24888    |           |
| 22 | 22 | 696.41327  | 24 | 20 | 7  | -69.14411  | 14        | 14 | 7  | 7  | 32.93721    | 20        | 20 | 17 | 16 | -7.51615   |           |
| 23 | 23 | 609.96332  | 24 | 21 | 6  | -13.23015  | 14        | 14 | 8  | 8  | 44.90608    | 20        | 20 | 17 | 17 | 55.25736   |           |
| 24 | 24 | 414.27386  | 24 | 21 | 7  | 27.25561   | 14        | 14 | 9  | 9  | -59.80369   | 20        | 20 | 18 | 15 | 0.96865    |           |
|    |    |            | 24 | 22 | 6  | 3.83590    | 14        | 14 | 10 | 9  | -1.69046    | 20        | 20 | 18 | 16 | -4.32033   |           |
|    |    |            | 24 | 22 | 7  | -3.66650   | 14        | 14 | 10 | 10 | -2.95674    | 20        | 20 | 18 | 17 | -3.62376   |           |
|    |    |            | 24 | 23 | 1  | -106.06212 | 14        | 14 | 11 | 9  | 3.55429     | 20        | 20 | 18 | 18 | -1.01724   |           |
|    |    |            | 24 | 23 | 2  | -58.11331  | 14        | 14 | 11 | 10 | 0.57924     | 20        | 20 | 19 | 19 | -5.07518   |           |
|    |    |            | 24 | 23 | 3  | 5.16553    | 14        | 14 | 11 | 11 | -3.88298    | 20        | 20 | 20 | 19 | -2.17152   |           |
|    |    |            | 24 | 23 | 4  | 25.93578   | 14        | 14 | 12 | 9  | 0.62977     | 20        | 20 | 20 | 20 | 36.44918   |           |
|    |    |            | 24 | 23 | 5  | -4.22044   | 14        | 14 | 12 | 10 | 5.16868     | 21        | 19 | 1  | 1  | -4.11431   |           |
|    |    |            | 24 | 24 | 1  | 34.29128   | 14        | 14 | 12 | 11 | 0.92677     | 21        | 19 | 2  | 2  | 5.06553    |           |
|    |    |            | 24 | 24 | 2  | -43.43585  | 14        | 14 | 12 | 12 | 4.19595     | 21        | 19 | 3  | 3  | 1.27337    |           |
|    |    |            | 24 | 24 | 3  | 71.65288   | 14        | 14 | 13 | 13 | 20.53300    | 21        | 19 | 4  | 4  | 0.27537    |           |
|    |    |            | 24 | 24 | 4  | -5.61286   | 14        | 14 | 14 | 13 | -24.25994   | 21        | 19 | 5  | 5  | -0.53003   |           |
|    |    |            | 24 | 24 | 5  | 3.03685    | 14        | 14 | 14 | 14 | 27.47757    | 21        | 19 | 6  | 6  | 0.78569    |           |
|    |    |            |    |    |    |            | 15        | 15 | 1  | 1  | 142.43701   | 21        | 19 | 7  | 7  | -1.24711   |           |
|    |    |            |    |    |    |            | 15        | 15 | 2  | 1  | 15.45486    | 21        | 19 | 8  | 8  | -1.66965   |           |
|    |    |            |    |    |    |            | 15        | 15 | 2  | 2  | -9.08585    | 21        | 19 | 9  | 9  | 0.71265    |           |
|    |    |            | 1  | 1  | 1  | 1          | 141.64946 | 15 | 15 | 3  | 1           | 14.96383  | 21 | 19 | 10 | 10         | -0.70858  |
|    |    |            | 2  | 1  | 1  | 1          | 15.81022  | 15 | 15 | 3  | 2           | -4.51303  | 21 | 19 | 11 | 11         | 0.62265   |
|    |    |            | 2  | 2  | 1  | 1          | -8.33258  | 15 | 15 | 3  | 3           | -3.02279  | 21 | 19 | 12 | 12         | -1.00885  |
|    |    |            | 2  | 2  | 2  | 1          | -9.54900  | 15 | 15 | 4  | 1           | -4.38518  | 21 | 19 | 14 | 14         | 0.83144   |
|    |    |            | 2  | 2  | 2  | 2          | 27.69174  | 15 | 15 | 4  | 2           | 22.31162  | 21 | 19 | 15 | 15         | -3.77362  |
|    |    |            | 3  | 1  | 1  | 1          | 14.75118  | 15 | 15 | 4  | 3           | 13.48106  | 21 | 19 | 16 | 16         | 3.74360   |
|    |    |            | 3  | 2  | 1  | 1          | -4.50212  | 15 | 15 | 4  | 4           | -40.58684 | 21 | 19 | 17 | 17         | 1.52300   |
|    |    |            | 3  | 2  | 2  | 1          | -6.88591  | 15 | 15 | 5  | 1           | -0.75181  | 21 | 19 | 18 | 18         | 0.29957   |
|    |    |            | 3  | 2  | 2  | 2          | 9.16825   | 15 | 15 | 5  | 2           | 13.93534  | 21 | 19 | 19 | 19         | 0.30753   |
|    |    |            | 3  | 3  | 1  | 1          | -2.82363  | 15 | 15 | 5  | 3           | 9.15134   | 21 | 20 | 1  | 1          | -14.75644 |
|    |    |            | 3  | 3  | 2  | 1          | -1.52311  | 15 | 15 | 5  | 4           | -28.44697 | 21 | 20 | 2  | 2          | -4.63479  |
|    |    |            | 3  | 3  | 2  | 2          | 13.56224  | 15 | 15 | 5  | 5           | -20.93969 | 21 | 20 | 3  | 3          | -1.97251  |
|    |    |            | 3  | 3  | 3  | 1          | -1.90091  | 15 | 15 | 6  | 6           | -65.76376 | 21 | 20 | 4  | 4          | 2.67501   |
|    |    |            | 3  | 3  | 3  | 2          | -4.67719  | 15 | 15 | 7  | 6           | 63.88241  | 21 | 20 | 5  | 5          | 2.59987   |
|    |    |            | 3  | 3  | 3  | 3          | 8.74058   | 15 | 15 | 7  | 7           | -62.65492 | 21 | 20 | 6  | 6          | 1.89745   |
|    |    |            | 4  | 1  | 1  | 1          | -4.69510  | 15 | 15 | 8  | 8           | -94.81222 | 21 | 20 | 7  | 7          | 2.92480   |
|    |    |            | 4  | 2  | 1  | 1          | 21.80665  | 15 | 15 | 9  | 9           | 145.24147 | 21 | 20 | 8  | 8          | 3.57798   |
|    |    |            | 4  | 2  | 2  | 1          | -0.42253  | 15 | 15 | 10 | 9           | 6.83758   | 21 | 20 | 9  | 9          | -14.81516 |
|    |    |            | 4  | 2  | 2  | 2          | 15.31829  | 15 | 15 | 10 | 10          | -18.54147 | 21 | 20 | 10 | 10         | -3.26243  |
|    |    |            | 4  | 3  | 1  | 1          | 13.45546  | 15 | 15 | 11 | 9           | -11.25496 | 21 | 20 | 11 | 11         | -0.85877  |
|    |    |            | 4  | 3  | 2  | 2          | 7.35233   | 15 | 15 | 11 | 10          | -6.56622  | 21 | 20 | 12 | 12         | 2.89434   |
|    |    |            | 4  | 3  | 3  | 1          | 0.27847   | 15 | 15 | 11 | 11          | -3.70016  | 21 | 20 | 13 | 13         | 1.90664   |
|    |    |            | 4  | 3  | 3  | 2          | 1.44380   | 15 | 15 | 12 | 9           | -3.90909  | 21 | 20 | 14 | 14         | 3.19519   |
|    |    |            | 4  | 3  | 3  | 3          | 1.71718   | 15 | 15 | 12 | 10          | -28.98335 | 21 | 20 | 15 | 15         | -14.87886 |
|    |    |            | 4  | 4  | 1  | 1          | -39.85812 | 15 | 15 | 12 | 11          | -10.40580 | 21 | 20 | 16 | 16         | 0.90895   |
|    |    |            | 4  | 4  | 2  | 1          | -5.17253  | 15 | 15 | 12 | 12          | -48.15445 | 21 | 20 | 17 | 17         | -6.33905  |
|    |    |            | 4  | 4  | 2  | 2          | 7.71111   | 15 | 15 | 13 | 13          | -39.69335 | 21 | 20 | 18 | 18         | 4.67906   |
|    |    |            | 4  | 4  | 3  | 1          | -2.94272  | 15 | 15 | 14 | 13          | 47.73786  | 21 | 20 | 19 | 19         | -14.83834 |
|    |    |            | 4  | 4  | 3  | 2          | 4.29318   | 15 | 15 | 14 | 14          | -59.18050 | 21 | 20 | 20 | 20         | -0.48954  |
|    |    |            | 4  | 4  | 3  | 3          | 2.48243   | 15 | 15 | 15 | 15          | 143.56014 | 21 | 20 | 20 | 20         | -2.80401  |
|    |    |            | 4  | 4  | 4  | 1          | -1.51650  | 16 | 15 | 1  | 1           | 19.72021  | 21 | 21 | 1  | 1          | -56.50261 |
|    |    |            | 4  | 4  | 4  | 2          | -0.63480  | 16 | 15 | 2  | 2           | -10.99606 | 21 | 21 | 2  | 1          | -3.50881  |
|    |    |            | 4  | 4  | 4  | 3          | -1.72044  | 16 | 15 | 3  | 3           | -1.84834  | 21 | 21 | 2  | 2          | 1.93906   |
|    |    |            | 4  | 4  | 4  | 4          | 14.83711  | 16 | 15 | 4  | 4           | -4.51305  | 21 | 21 | 3  | 1          | -2.17350  |







| I  | J  | K  | FI(I,J,K)  | I  | J  | K  | L  | FI(I,J,K,L) | I  | J  | K  | L  | FI(I,J,K,L) | I  | J  | K  | L  | I(I,J,K,L) |
|----|----|----|------------|----|----|----|----|-------------|----|----|----|----|-------------|----|----|----|----|------------|
| 22 | 17 | 11 | -14.45143  | 12 | 12 | 11 | 9  | 1.10943     | 19 | 19 | 14 | 13 | 48.53818    | 24 | 24 | 5  | 1  | -0.33130   |
| 22 | 17 | 12 | 7.35642    | 12 | 12 | 11 | 10 | -1.17857    | 19 | 19 | 14 | 14 | -60.20061   | 24 | 24 | 5  | 2  | 1.16330    |
| 22 | 18 | 9  | -29.44370  | 12 | 12 | 11 | 11 | 0.48256     | 19 | 19 | 15 | 15 | 145.80071   | 24 | 24 | 5  | 3  | -0.45128   |
| 22 | 18 | 10 | 8.21013    | 12 | 12 | 12 | 9  | -0.20542    | 19 | 19 | 16 | 15 | 18.18317    | 24 | 24 | 5  | 4  | 0.82211    |
| 22 | 18 | 11 | 4.14708    | 12 | 12 | 12 | 10 | 8.14884     | 19 | 19 | 16 | 16 | -14.82146   | 24 | 24 | 5  | 5  | 5.06639    |
| 22 | 18 | 12 | -27.02481  | 12 | 12 | 12 | 11 | 5.07644     | 19 | 19 | 17 | 15 | 3.09860     | 24 | 24 | 6  | 6  | 9.89257    |
| 22 | 19 | 1  | -18.40740  | 12 | 12 | 12 | 12 | 13.50020    | 19 | 19 | 17 | 16 | -8.54803    | 24 | 24 | 7  | 6  | -3.93386   |
| 22 | 19 | 2  | 5.05368    | 13 | 13 | 1  | 1  | -39.43963   | 19 | 19 | 17 | 17 | -6.41044    | 24 | 24 | 7  | 7  | 26.81791   |
| 22 | 19 | 3  | -0.36768   | 13 | 13 | 2  | 1  | -0.13404    | 19 | 19 | 18 | 15 | 0.73454     | 24 | 24 | 8  | 8  | 11.72876   |
| 22 | 19 | 4  | -23.74021  | 13 | 13 | 2  | 2  | -13.09876   | 19 | 19 | 18 | 16 | 28.94463    | 24 | 24 | 9  | 9  | -15.07900  |
| 22 | 19 | 5  | -14.96580  | 13 | 13 | 3  | 1  | -1.11837    | 19 | 19 | 18 | 17 | 15.91018    | 24 | 24 | 10 | 9  | 2.38939    |
| 22 | 20 | 1  | -18.70669  | 13 | 13 | 3  | 3  | -3.98518    | 19 | 19 | 18 | 18 | -55.11123   | 24 | 24 | 10 | 10 | -16.14134  |
| 22 | 20 | 2  | -15.53739  | 13 | 13 | 4  | 1  | 1.45954     | 19 | 19 | 19 | 19 | 148.61467   | 24 | 24 | 11 | 9  | 1.03680    |
| 22 | 20 | 3  | 29.06214   | 13 | 13 | 4  | 2  | -5.27979    | 20 | 19 | 1  | 1  | 6.74665     | 24 | 24 | 11 | 11 | -5.23997   |
| 22 | 20 | 4  | 10.06870   | 13 | 13 | 4  | 3  | -2.68355    | 20 | 19 | 3  | 3  | -0.74311    | 24 | 24 | 12 | 10 | 6.59022    |
| 22 | 20 | 5  | 9.96167    | 13 | 13 | 4  | 4  | 1.81870     | 20 | 19 | 4  | 4  | 1.06390     | 24 | 24 | 12 | 11 | -1.57460   |
| 22 | 21 | 1  | -24.81550  | 13 | 13 | 5  | 1  | -0.73199    | 20 | 19 | 5  | 5  | 0.21128     | 24 | 24 | 12 | 12 | -5.74002   |
| 22 | 21 | 2  | 1.51536    | 13 | 13 | 5  | 2  | -0.25998    | 20 | 19 | 7  | 7  | -3.86523    | 24 | 24 | 13 | 13 | 10.04145   |
| 22 | 21 | 3  | 2.21469    | 13 | 13 | 5  | 3  | -0.73652    | 20 | 19 | 8  | 8  | -1.09767    | 24 | 24 | 14 | 13 | -3.42510   |
| 22 | 21 | 4  | -20.24665  | 13 | 13 | 5  | 4  | 3.55038     | 20 | 19 | 9  | 9  | 8.10604     | 24 | 24 | 14 | 14 | 13.02761   |
| 22 | 21 | 5  | -5.57638   | 13 | 13 | 5  | 5  | 2.07620     | 20 | 19 | 10 | 10 | -3.85962    | 24 | 24 | 15 | 15 | -14.33680  |
| 22 | 22 | 1  | 4.17197    | 13 | 13 | 6  | 6  | 17.82203    | 20 | 19 | 11 | 11 | 2.06531     | 24 | 24 | 16 | 15 | -2.09488   |
| 22 | 22 | 2  | 21.51739   | 13 | 13 | 7  | 6  | -19.18097   | 20 | 19 | 12 | 12 | -1.31933    | 24 | 24 | 16 | 16 | -5.80873   |
| 22 | 22 | 3  | -18.18095  | 13 | 13 | 7  | 7  | 29.91764    | 20 | 19 | 13 | 13 | 0.56116     | 24 | 24 | 17 | 15 | -3.09714   |
| 22 | 22 | 4  | -10.59154  | 13 | 13 | 8  | 8  | 31.06205    | 20 | 19 | 14 | 14 | -0.55092    | 24 | 24 | 17 | 16 | 3.86523    |
| 22 | 22 | 5  | -4.81198   | 13 | 13 | 9  | 9  | -39.99637   | 20 | 19 | 15 | 15 | 7.11275     | 24 | 24 | 17 | 17 | -34.24431  |
| 23 | 13 | 9  | -166.26646 | 13 | 13 | 10 | 9  | -0.28948    | 20 | 19 | 16 | 16 | 3.68196     | 24 | 24 | 18 | 15 | 0.27289    |
| 23 | 13 | 10 | -19.06209  | 13 | 13 | 10 | 10 | -5.52752    | 20 | 19 | 17 | 17 | -4.75363    | 24 | 24 | 18 | 16 | 2.26736    |
| 23 | 13 | 11 | -19.27378  | 13 | 13 | 11 | 9  | 0.90656     | 20 | 19 | 18 | 18 | 0.77743     | 24 | 24 | 18 | 17 | 4.46929    |
| 23 | 13 | 12 | 3.70852    | 13 | 13 | 11 | 10 | 0.91689     | 20 | 19 | 19 | 19 | 8.14045     | 24 | 24 | 19 | 19 | -15.13901  |
| 23 | 14 | 9  | 203.54058  | 13 | 13 | 11 | 11 | -0.44721    | 20 | 20 | 1  | 1  | -5.66278    | 24 | 24 | 20 | 19 | 2.05644    |
| 23 | 14 | 10 | 2.18386    | 13 | 13 | 12 | 9  | -0.17609    | 20 | 20 | 2  | 1  | 4.16112     | 24 | 24 | 20 | 20 | -29.42542  |
| 23 | 14 | 11 | -13.47754  | 13 | 13 | 12 | 10 | 4.74705     | 20 | 20 | 2  | 2  | 14.58912    | 24 | 24 | 21 | 19 | 1.23967    |
| 23 | 14 | 12 | 5.88223    | 13 | 13 | 12 | 11 | 1.18153     | 20 | 20 | 3  | 1  | -0.30341    | 24 | 24 | 21 | 20 | 4.47931    |
| 23 | 15 | 8  | 260.11843  | 13 | 13 | 12 | 12 | 3.90371     | 20 | 20 | 3  | 2  | -21.52545   | 24 | 24 | 21 | 21 | -4.18600   |
| 23 | 16 | 8  | 15.98491   | 13 | 13 | 13 | 13 | 7.78989     | 20 | 20 | 3  | 3  | 16.90264    | 24 | 24 | 22 | 19 | -0.81735   |
| 23 | 17 | 8  | -6.17684   | 14 | 13 | 1  | 1  | 47.16597    | 20 | 20 | 4  | 1  | 0.15070     | 24 | 24 | 22 | 20 | 2.73959    |
| 23 | 18 | 8  | 20.66538   | 14 | 13 | 2  | 2  | -6.85761    | 20 | 20 | 4  | 2  | -4.38465    | 24 | 24 | 22 | 22 | -3.01834   |
| 23 | 19 | 6  | -211.15466 | 14 | 13 | 3  | 3  | -2.63622    | 20 | 20 | 4  | 3  | 1.96185     | 24 | 24 | 23 | 23 | 25.97708   |
| 23 | 19 | 7  | 224.73139  | 14 | 13 | 4  | 4  | -4.70200    | 20 | 20 | 4  | 4  | 0.28459     | 24 | 24 | 24 | 23 | 3.76137    |
| 23 | 20 | 6  | -4.83654   | 14 | 13 | 5  | 5  | -2.91491    | 20 | 20 | 5  | 1  | 1.99876     | 24 | 24 | 24 | 24 | 27.89250   |
| 23 | 20 | 7  | 6.41595    | 14 | 13 | 6  | 6  | -26.28334   | 20 | 20 | 5  | 2  | -1.24466    |    |    |    |    |            |
| 23 | 21 | 6  | -2.38144   | 14 | 13 | 7  | 7  | -24.92315   | 20 | 20 | 5  | 3  | -6.31497    |    |    |    |    |            |

Table S40: The quartic potential energy surface of trans-butadiene. The calculation was done by using B3LYP/6-311++G(2d,2p) method. The force constants (F) are in  $\text{cm}^{-1}$  units.

| I J   | F(I,J)     | I J K   | F(I,J,K)   | I J K L     | F(I,J,K,L) | I J K L     | F(I,J,K,L) |
|-------|------------|---------|------------|-------------|------------|-------------|------------|
| 1 1   | 3225.98254 | 24 19 3 | -5.24711   | 14 14 5 4   | -3.62595   | 21 21 9 3   | 0.15120    |
| 2 2   | 3141.90745 | 24 19 4 | 0.77143    | 14 14 5 5   | 6.78011    | 21 21 9 4   | -2.97915   |
| 3 3   | 3130.46038 | 24 19 5 | 12.23770   | 14 14 6 1   | 1.32551    | 21 21 9 5   | -3.98999   |
| 4 4   | 1698.03059 | 24 19 6 | -64.89978  | 14 14 6 2   | -1.19051   | 21 21 9 6   | -6.25342   |
| 5 5   | 1481.67652 | 24 19 7 | -137.48299 | 14 14 6 3   | 1.00909    | 21 21 9 7   | -12.46242  |
| 6 6   | 1319.61569 | 24 19 8 | -259.80385 | 14 14 6 4   | -9.09158   | 21 21 9 8   | -24.94330  |
| 7 7   | 1229.76970 | 24 19 9 | 190.37166  | 14 14 6 5   | 10.19904   | 21 21 9 9   | 20.26206   |
| 8 8   | 900.38825  | 24 20 1 | 139.83912  | 14 14 6 6   | 12.46500   | 21 21 10 10 | 4.07168    |
| 9 9   | 519.29333  | 24 20 2 | -43.45662  | 14 14 7 1   | 0.80807    | 21 21 11 10 | -1.23630   |
| 10 10 | 1053.01767 | 24 20 3 | 20.63271   | 14 14 7 2   | -2.20334   | 21 21 11 11 | 11.43817   |
| 11 11 | 941.11783  | 24 20 4 | -13.88883  | 14 14 7 3   | 8.61781    | 21 21 12 10 | -1.00505   |
| 12 12 | 538.56044  | 24 20 5 | 11.88343   | 14 14 7 4   | 8.83813    | 21 21 12 11 | 6.07485    |
| 13 13 | 172.96269  | 24 20 6 | 8.00972    | 14 14 7 5   | -6.01445   | 21 21 12 12 | 13.13462   |
| 14 14 | 1000.01373 | 24 20 7 | 29.05057   | 14 14 7 6   | -11.41021  | 21 21 13 10 | 3.90589    |
| 15 15 | 940.26865  | 24 20 8 | -36.78080  | 14 14 7 7   | 2.72089    | 21 21 13 11 | -6.59501   |
| 16 16 | 779.06676  | 24 20 9 | 39.91059   | 14 14 8 1   | 1.37783    | 21 21 13 12 | 5.52628    |
| 17 17 | 3226.37012 | 24 21 1 | -216.07886 | 14 14 8 2   | 1.57279    | 21 21 13 13 | -20.77173  |
| 18 18 | 3143.17691 | 24 21 2 | 1.82407    | 14 14 8 3   | -0.87498   | 21 21 14 14 | 4.94933    |
| 19 19 | 3139.30065 | 24 21 3 | 19.75537   | 14 14 8 4   | 4.69419    | 21 21 15 14 | -1.52064   |
| 20 20 | 1647.74912 | 24 21 4 | -12.92516  | 14 14 8 5   | 2.98774    | 21 21 15 15 | 10.59752   |
| 21 21 | 1420.50113 | 24 21 5 | 6.58836    | 14 14 8 6   | -2.07964   | 21 21 16 14 | -2.95836   |
| 22 22 | 1327.12304 | 24 21 6 | 8.14200    | 14 14 8 7   | 8.27943    | 21 21 16 15 | 5.51629    |
| 23 23 | 1010.35741 | 24 21 7 | 17.12388   | 14 14 8 8   | 5.18415    | 21 21 16 16 | 4.73114    |
| 24 24 | 298.89119  | 24 21 8 | -4.70128   | 14 14 9 1   | -0.59898   | 21 21 17 17 | -88.90048  |
|       |            | 24 21 9 | 5.40944    | 14 14 9 2   | -2.89340   | 21 21 18 17 | -3.97984   |
| I J K | F(I,J,K)   | 24 22 1 | 1.02275    | 14 14 9 3   | 4.10360    | 21 21 18 18 | -29.33556  |
|       |            | 24 22 2 | -136.78324 | 14 14 9 4   | -4.67397   | 21 21 19 17 | -14.78284  |
| 1 1 1 | -447.64648 | 24 22 3 | 57.09075   | 14 14 9 6   | 4.58176    | 21 21 19 18 | 11.38734   |
| 2 1 1 | -825.45920 | 24 22 4 | -10.90575  | 14 14 9 7   | -6.38409   | 21 21 19 19 | -60.48102  |
| 2 2 1 | 177.24644  | 24 22 5 | 14.94690   | 14 14 9 8   | -5.66208   | 21 21 20 17 | 0.94408    |
| 2 2 2 | -850.86618 | 24 22 6 | 20.53248   | 14 14 9 9   | 4.03733    | 21 21 20 18 | -0.19258   |
| 3 1 1 | -414.75166 | 24 22 7 | -37.96089  | 14 14 10 10 | 154.08680  | 21 21 20 19 | 4.94292    |
| 3 2 1 | 48.81379   | 24 22 8 | 6.65556    | 14 14 11 10 | -18.67791  | 21 21 20 20 | 16.56159   |
| 3 2 2 | -106.13806 | 24 23 1 | 36.61008   | 14 14 11 11 | 37.07682   | 21 21 21 17 | -2.15346   |
| 3 3 1 | -169.88421 | 24 23 2 | 225.29095  | 14 14 12 10 | 117.90158  | 21 21 21 18 | 3.86706    |
| 3 3 2 | -620.81328 | 24 23 3 | 189.19223  | 14 14 12 11 | 23.51798   | 21 21 21 19 | -9.34164   |
| 3 3 3 | 955.71629  | 24 23 4 | 2.66034    | 14 14 12 12 | 179.48694  | 21 21 21 20 | -3.40692   |
| 4 1 1 | -3.61733   | 24 23 5 | -6.67293   | 14 14 13 10 | 93.37593   | 21 21 21 21 | 12.93971   |
| 4 2 1 | 9.20671    | 24 23 6 | 33.26188   | 14 14 13 11 | -18.50078  | 22 17 1 1   | 1.08359    |
| 4 2 2 | 41.50309   | 24 23 7 | -18.11779  | 14 14 13 12 | 74.66116   | 22 17 2 2   | -4.45786   |
| 4 3 2 | 10.70516   | 24 23 9 | 3.29654    | 14 14 13 13 | 51.40996   | 22 17 3 3   | -1.86941   |
| 4 3 3 | 15.66287   | 24 24 1 | 49.37554   | 14 14 14 14 | 165.62315  | 22 17 4 4   | 2.02534    |
| 4 4 1 | 10.99915   | 24 24 2 | 289.59924  | 15 14 1 1   | 41.67509   | 22 17 5 5   | 0.09926    |
| 4 4 2 | 86.05580   | 24 24 3 | 83.99705   | 15 14 2 2   | -19.32572  | 22 17 6 6   | 1.36215    |
| 4 4 3 | -52.02509  | 24 24 4 | -129.60437 | 15 14 3 3   | -32.84406  | 22 17 7 7   | 4.24742    |
| 4 4 4 | 205.59105  | 24 24 5 | 1.07344    | 15 14 4 4   | 3.00491    | 22 17 8 8   | 5.96729    |
| 5 1 1 | -67.60583  | 24 24 6 | -84.88294  | 15 14 5 5   | -3.10032   | 22 17 9 9   | 0.11809    |
| 5 2 1 | 18.63506   | 24 24 7 | 19.24104   | 15 14 6 6   | 4.13203    | 22 17 10 10 | 1.00513    |
| 5 2 2 | 12.50317   | 24 24 8 | 34.73814   | 15 14 7 7   | 0.84002    | 22 17 11 11 | 4.36858    |
| 5 3 1 | -1.01265   | 24 24 9 | -17.40578  | 15 14 8 8   | -3.10673   | 22 17 12 12 | 5.88056    |
| 5 3 2 | 1.05004    |         |            | 15 14 10 10 | 22.56327   | 22 17 13 13 | -4.68095   |
| 5 3 3 | 18.02484   | I J K L | F(I,J,K,L) | 15 14 11 11 | -12.56946  | 22 17 14 14 | 1.48461    |
| 5 4 1 | 9.31385    |         |            | 15 14 12 12 | -17.61409  | 22 17 15 15 | 3.66157    |
| 5 4 2 | 27.40077   | 1 1 1 1 | 307.80492  | 15 14 13 13 | 17.88060   | 22 17 16 16 | 3.84914    |
| 5 4 3 | 83.14826   | 2 1 1 1 | 55.57858   | 15 14 14 14 | 12.49305   | 22 17 17 17 | 0.95018    |
| 5 4 4 | 13.45186   | 2 2 1 1 | 199.18791  | 15 15 1 1   | -193.50009 | 22 18 1 1   | 1.77687    |
| 5 5 1 | 59.88642   | 2 2 2 1 | -84.99526  | 15 15 2 1   | 65.33058   | 22 18 2 2   | -2.00036   |
| 5 5 2 | 115.38253  | 2 2 2 2 | 222.07070  | 15 15 2 2   | -181.90999 | 22 18 3 3   | 4.57082    |
| 5 5 3 | 5.80078    | 3 1 1 1 | 61.16926   | 15 15 3 1   | 8.61288    | 22 18 4 4   | -0.04774   |
| 5 5 4 | 12.30285   | 3 2 1 1 | 95.41923   | 15 15 3 2   | -72.58961  | 22 18 5 5   | -1.32607   |
| 5 5 5 | 64.02627   | 3 2 2 1 | -26.42811  | 15 15 3 3   | -39.90277  | 22 18 6 6   | 8.25171    |
| 6 1 1 | 38.28655   | 3 2 2 2 | 48.50404   | 15 15 4 1   | 1.53765    | 22 18 7 7   | -7.43767   |
| 6 2 1 | 6.74484    | 3 3 1 1 | 57.09388   | 15 15 4 2   | -1.66798   | 22 18 8 8   | 0.99638    |
| 6 2 2 | 3.45811    | 3 3 2 1 | 22.48757   | 15 15 4 3   | -0.07740   | 22 18 9 9   | 2.93810    |
| 6 3 1 | 3.21299    | 3 3 2 2 | 114.85122  | 15 15 4 4   | -0.59962   | 22 18 10 10 | 1.42880    |
| 6 3 2 | 2.74476    | 3 3 3 1 | -34.52216  | 15 15 5 1   | 2.10974    | 22 18 11 11 | 1.33768    |
| 6 3 3 | 4.88669    | 3 3 3 2 | -153.04710 | 15 15 5 2   | -11.62459  | 22 18 12 12 | 5.27527    |
| 6 4 1 | 29.04497   | 3 3 3 3 | 381.81783  | 15 15 5 3   | -4.65535   | 22 18 13 13 | -6.83897   |
| 6 4 2 | -42.76768  | 4 1 1 1 | -3.08016   | 15 15 5 4   | 8.46196    | 22 18 14 14 | -0.82097   |
| 6 4 3 | 68.03712   | 4 2 1 1 | -0.40901   | 15 15 5 5   | 12.75640   | 22 18 15 15 | 1.10946    |
| 6 4 4 | 130.01917  | 4 2 2 1 | -0.28722   | 15 15 6 1   | 2.49826    | 22 18 16 16 | 0.32953    |
| 6 5 1 | 62.07047   | 4 2 2 2 | -11.34334  | 15 15 6 2   | 2.14397    | 22 18 17 17 | 1.87343    |
| 6 5 2 | -7.88711   | 4 3 1 1 | -1.60028   | 15 15 6 3   | 1.41502    | 22 18 18 17 | -0.99970   |
| 6 5 3 | -77.58000  | 4 3 2 2 | -3.13531   | 15 15 6 4   | -5.34764   | 22 18 18 18 | 2.33511    |
| 6 5 4 | -28.00253  | 4 3 3 1 | -1.28674   | 15 15 6 5   | -6.76873   | 22 19 1 1   | -3.87335   |
| 6 5 5 | -9.61142   | 4 3 3 2 | -4.49473   | 15 15 6 6   | 5.85963    | 22 19 2 2   | 3.60046    |
| 6 6 1 | -14.66756  | 4 3 3 3 | 3.01560    | 15 15 7 1   | 3.49909    | 22 19 3 3   | 3.55609    |
| 6 6 2 | 85.13914   | 4 4 1 1 | -23.44903  | 15 15 7 2   | -1.50823   | 22 19 4 4   | 1.91189    |
| 6 6 3 | -86.20120  | 4 4 2 1 | 2.62478    | 15 15 7 3   | 0.12741    | 22 19 5 5   | 1.89925    |
| 6 6 4 | 42.99571   | 4 4 2 2 | -22.81671  | 15 15 7 4   | -1.19136   | 22 19 6 6   | -1.92548   |
| 6 6 5 | 0.82573    | 4 4 3 1 | 3.22493    | 15 15 7 5   | -4.05404   | 22 19 7 7   | -4.85627   |
| 6 6 6 | 79.58741   | 4 4 3 2 | 9.44539    | 15 15 7 6   | 5.66613    | 22 19 8 8   | -1.63956   |
| 7 1 1 | 9.45957    | 4 4 3 3 | -41.13197  | 15 15 7 7   | 4.44702    | 22 19 9 9   | 1.43855    |
| 7 2 1 | 19.60859   | 4 4 4 1 | 0.78136    | 15 15 8 1   | -0.34619   | 22 19 10 10 | -0.67942   |
| 7 2 2 | -13.24907  | 4 4 4 2 | 6.69692    | 15 15 8 2   | -4.19512   | 22 19 11 11 | 0.09409    |
| 7 3 1 | 12.14127   | 4 4 4 3 | -2.99113   | 15 15 8 3   | -1.34835   | 22 19 12 12 | -2.12243   |









| I J K    | F(I,J,K)   | I J K L   | F(I,J,K,L) | I J K L     | F(I,J,K,L) | I J K L     | F(I,J,K,L) |
|----------|------------|-----------|------------|-------------|------------|-------------|------------|
| 18 15 10 | -112.22249 | 9 7 7 5   | -1.88572   | 19 17 11 11 | -1.79503   | 23 23 3 1   | -5.17246   |
| 18 15 11 | -143.00635 | 9 7 7 6   | -1.28604   | 19 17 12 12 | -45.80425  | 23 23 3 2   | -15.38460  |
| 18 15 12 | 39.30227   | 9 7 7 7   | -14.56503  | 19 17 13 13 | 41.85578   | 23 23 3 3   | -83.41319  |
| 18 15 13 | 74.94294   | 9 8 1 1   | 73.39912   | 19 17 14 14 | -11.84477  | 23 23 4 1   | 0.65178    |
| 18 16 10 | -87.68857  | 9 8 2 2   | 59.71271   | 19 17 15 15 | 49.10215   | 23 23 4 2   | 7.41048    |
| 18 16 11 | 34.80370   | 9 8 3 3   | 19.32278   | 19 17 16 16 | -68.43473  | 23 23 4 3   | 5.60433    |
| 18 16 12 | -219.79081 | 9 8 4 4   | -5.29598   | 19 17 17 17 | 83.90366   | 23 23 4 4   | 13.21534   |
| 18 16 13 | -118.73604 | 9 8 5 5   | -28.64065  | 19 18 1 1   | -71.24583  | 23 23 5 1   | 4.90916    |
| 18 17 1  | 293.99897  | 9 8 6 6   | -9.39577   | 19 18 2 2   | -56.78650  | 23 23 5 2   | 13.30250   |
| 18 17 2  | -100.64716 | 9 8 7 7   | -3.05046   | 19 18 3 3   | 135.66130  | 23 23 5 3   | 3.16017    |
| 18 17 3  | -196.52895 | 9 8 8 1   | -2.63280   | 19 18 4 4   | -9.10494   | 23 23 5 4   | 14.67121   |
| 18 17 4  | -6.80664   | 9 8 8 2   | 0.28540    | 19 18 5 5   | 9.17336    | 23 23 5 5   | 46.76598   |
| 18 17 5  | -16.84165  | 9 8 8 3   | 1.02982    | 19 18 6 6   | -21.77557  | 23 23 6 1   | 7.28969    |
| 18 17 6  | -1.12795   | 9 8 8 4   | 2.18552    | 19 18 7 7   | -10.07843  | 23 23 6 2   | -5.50169   |
| 18 17 7  | -6.52366   | 9 8 8 5   | -9.69486   | 19 18 8 8   | 29.84520   | 23 23 6 3   | -2.26375   |
| 18 17 8  | -5.19718   | 9 8 8 6   | -14.54993  | 19 18 9 9   | 14.02174   | 23 23 6 4   | -20.25102  |
| 18 17 9  | 4.72192    | 9 8 8 7   | -29.33284  | 19 18 10 10 | -69.59343  | 23 23 6 5   | -3.47811   |
| 18 18 1  | -22.88285  | 9 8 8 8   | -38.21916  | 19 18 11 11 | 65.71263   | 23 23 6 6   | 32.65452   |
| 18 18 2  | -636.90531 | 9 9 1 1   | -49.10075  | 19 18 12 12 | 14.06225   | 23 23 7 1   | 9.05194    |
| 18 18 3  | 1016.05641 | 9 9 2 1   | 4.04665    | 19 18 13 13 | 6.93894    | 23 23 7 2   | -4.34923   |
| 18 18 4  | 20.00323   | 9 9 2 2   | -42.80104  | 19 18 14 14 | -82.56481  | 23 23 7 3   | 4.32704    |
| 18 18 5  | 12.05395   | 9 9 3 1   | -2.82467   | 19 18 15 15 | 73.25616   | 23 23 7 4   | 7.20241    |
| 18 18 6  | -0.59218   | 9 9 3 2   | -15.84727  | 19 18 16 16 | 16.65827   | 23 23 7 5   | -5.32337   |
| 18 18 7  | -11.12567  | 9 9 3 3   | -15.89276  | 19 18 17 17 | -69.67882  | 23 23 7 6   | -9.51026   |
| 18 18 8  | -12.37447  | 9 9 4 1   | 0.59175    | 19 18 18 17 | -50.63237  | 23 23 7 7   | 24.12001   |
| 18 18 9  | -18.02849  | 9 9 4 2   | 2.81890    | 19 18 18 18 | 136.73562  | 23 23 8 1   | 11.49001   |
| 19 14 10 | -70.18129  | 9 9 4 3   | -0.72213   | 19 19 1 1   | 223.66634  | 23 23 8 2   | -1.94087   |
| 19 14 11 | -27.58024  | 9 9 4 4   | -1.89880   | 19 19 2 1   | -50.86024  | 23 23 8 3   | 1.59259    |
| 19 14 12 | -314.12397 | 9 9 5 1   | 1.55176    | 19 19 2 2   | 213.18748  | 23 23 8 4   | 3.80106    |
| 19 14 13 | -92.37871  | 9 9 5 2   | 1.08343    | 19 19 3 1   | -5.05746   | 23 23 8 5   | 6.33026    |
| 19 15 10 | 42.46358   | 9 9 5 3   | 2.39681    | 19 19 3 2   | 59.75325   | 23 23 8 6   | 9.68803    |
| 19 15 11 | 391.14440  | 9 9 5 4   | 12.78731   | 19 19 3 3   | 97.95664   | 23 23 8 7   | 35.64764   |
| 19 15 12 | -97.63344  | 9 9 5 5   | 21.98373   | 19 19 4 1   | -1.03325   | 23 23 8 8   | 73.68361   |
| 19 15 13 | -255.49105 | 9 9 6 2   | -1.06357   | 19 19 4 2   | -11.12972  | 23 23 9 1   | -5.34957   |
| 19 16 10 | -188.12080 | 9 9 6 3   | 1.61662    | 19 19 4 3   | -4.64787   | 23 23 9 2   | 0.98047    |
| 19 16 11 | 59.55010   | 9 9 6 4   | -5.83361   | 19 19 4 4   | -22.62021  | 23 23 9 3   | 0.09654    |
| 19 16 12 | 321.88944  | 9 9 6 5   | -5.44243   | 19 19 5 1   | -4.26940   | 23 23 9 4   | -2.92137   |
| 19 16 13 | 26.88698   | 9 9 6 6   | 11.03140   | 19 19 5 2   | -7.53693   | 23 23 9 5   | 0.47886    |
| 19 17 1  | -873.86119 | 9 9 7 1   | 1.43639    | 19 19 5 3   | -1.84226   | 23 23 9 6   | -6.00135   |
| 19 17 2  | 154.77519  | 9 9 7 2   | 2.18715    | 19 19 5 4   | -26.60308  | 23 23 9 7   | -28.97099  |
| 19 17 3  | -104.25290 | 9 9 7 3   | -2.27255   | 19 19 5 5   | -73.13121  | 23 23 9 8   | -53.68049  |
| 19 17 4  | 6.62410    | 9 9 7 4   | 3.61766    | 19 19 6 1   | -2.89746   | 23 23 9 9   | 42.61902   |
| 19 17 5  | 10.70065   | 9 9 7 5   | -3.56388   | 19 19 6 2   | 1.02227    | 23 23 10 10 | 18.94526   |
| 19 17 6  | 7.72134    | 9 9 7 6   | 2.03425    | 19 19 6 3   | 1.05308    | 23 23 11 10 | 2.49822    |
| 19 17 7  | 22.30860   | 9 9 7 7   | 7.59682    | 19 19 6 4   | 24.31691   | 23 23 11 11 | 35.02316   |
| 19 17 8  | 14.89234   | 9 9 8 1   | 0.85663    | 19 19 6 5   | 17.04979   | 23 23 12 10 | -6.68384   |
| 19 17 9  | -6.63847   | 9 9 8 2   | 0.13773    | 19 19 6 6   | -39.13202  | 23 23 12 11 | 3.14452    |
| 19 18 1  | -193.92755 | 9 9 8 3   | 0.62473    | 19 19 7 1   | -7.20493   | 23 23 12 12 | 66.63800   |
| 19 18 2  | 123.02820  | 9 9 8 4   | -3.84553   | 19 19 7 2   | 3.86191    | 23 23 13 10 | 0.65171    |
| 19 18 3  | 539.32366  | 9 9 8 5   | 2.86107    | 19 19 7 3   | 0.12100    | 23 23 13 11 | -18.37645  |
| 19 18 4  | -12.34981  | 9 9 8 6   | 10.14357   | 19 19 7 4   | -0.12096   | 23 23 13 12 | 18.08482   |
| 19 18 5  | 2.95413    | 9 9 8 7   | 18.73241   | 19 19 7 5   | 11.13573   | 23 23 13 13 | 6.48740    |
| 19 18 6  | 0.47216    | 9 9 8 8   | 33.45744   | 19 19 7 6   | -9.91727   | 23 23 14 14 | 18.63795   |
| 19 18 7  | 3.92700    | 9 9 9 1   | 0.53038    | 19 19 7 7   | -28.12379  | 23 23 15 14 | 0.42121    |
| 19 18 8  | 4.01547    | 9 9 9 2   | -1.53566   | 19 19 8 1   | -8.54536   | 23 23 15 15 | 35.56738   |
| 19 18 9  | -6.47629   | 9 9 9 4   | 1.12169    | 19 19 8 2   | 5.25379    | 23 23 16 14 | -7.12592   |
| 19 19 1  | 25.55148   | 9 9 9 5   | 6.16362    | 19 19 8 3   | 0.69972    | 23 23 16 15 | 5.43410    |
| 19 19 2  | -832.97946 | 9 9 9 6   | -7.63428   | 19 19 8 4   | 6.65565    | 23 23 16 16 | 27.18642   |
| 19 19 3  | -185.62060 | 9 9 9 7   | -15.77578  | 19 19 8 5   | 4.12721    | 23 23 17 17 | -121.89561 |
| 19 19 4  | 39.43434   | 9 9 9 8   | -29.10494  | 19 19 8 6   | -34.84140  | 23 23 18 17 | -7.14349   |
| 19 19 5  | 17.73107   | 9 9 9 9   | 29.06547   | 19 19 8 7   | -44.87900  | 23 23 18 18 | -80.94155  |
| 19 19 6  | 7.31330    | 10 10 1 1 | -44.64889  | 19 19 8 8   | -90.72023  | 23 23 19 17 | -2.32815   |
| 19 19 7  | -5.19514   | 10 10 2 1 | -1.21090   | 19 19 9 1   | 5.40011    | 23 23 19 18 | 13.83767   |
| 19 19 8  | -10.99715  | 10 10 2 2 | -81.67478  | 19 19 9 2   | -1.03908   | 23 23 19 19 | -112.40804 |
| 19 19 9  | -5.92156   | 10 10 3 1 | 23.90119   | 19 19 9 3   | -0.36245   | 23 23 20 17 | -0.99339   |
| 20 14 10 | -6.45698   | 10 10 3 2 | 77.61827   | 19 19 9 4   | -5.49773   | 23 23 20 18 | 5.58922    |
| 20 14 11 | 8.10451    | 10 10 3 3 | -218.11078 | 19 19 9 5   | -8.36833   | 23 23 20 19 | -11.40425  |
| 20 14 12 | -1.86947   | 10 10 4 1 | -0.20387   | 19 19 9 6   | 23.51867   | 23 23 20 20 | 20.57705   |
| 20 14 13 | -40.80871  | 10 10 4 2 | -0.13633   | 19 19 9 7   | 32.18387   | 23 23 21 17 | 3.59195    |
| 20 15 10 | -2.68227   | 10 10 4 3 | -0.34069   | 19 19 9 8   | 62.85242   | 23 23 21 18 | -4.21862   |
| 20 15 11 | -51.11330  | 10 10 4 4 | 6.25029    | 19 19 9 9   | -44.44359  | 23 23 21 19 | 10.73725   |
| 20 15 12 | -16.93869  | 10 10 5 1 | 1.54254    | 19 19 10 10 | -73.38136  | 23 23 21 20 | -24.29056  |
| 20 15 13 | 68.60235   | 10 10 5 2 | 1.70801    | 19 19 11 10 | -23.95580  | 23 23 21 21 | 40.29065   |
| 20 16 10 | 3.42158    | 10 10 5 3 | -1.01853   | 19 19 11 11 | -171.98019 | 23 23 22 17 | 8.92666    |
| 20 16 11 | -21.94427  | 10 10 5 4 | -4.14515   | 19 19 12 10 | 61.15647   | 23 23 22 18 | 1.02922    |
| 20 16 12 | 50.15339   | 10 10 5 5 | 5.62391    | 19 19 12 11 | 25.74858   | 23 23 22 19 | -4.09883   |
| 20 16 13 | -42.30013  | 10 10 6 1 | 0.22892    | 19 19 12 12 | -226.00929 | 23 23 22 20 | 13.24576   |
| 20 17 1  | 10.84354   | 10 10 6 2 | -2.20415   | 19 19 13 10 | 14.52480   | 23 23 22 21 | 4.20596    |
| 20 17 2  | -11.15776  | 10 10 6 3 | 1.50928    | 19 19 13 11 | 93.12477   | 23 23 22 22 | 36.78027   |
| 20 17 3  | 2.73870    | 10 10 6 4 | -8.27689   | 19 19 13 12 | -67.90538  | 23 23 23 17 | -14.29210  |
| 20 17 4  | -10.49167  | 10 10 6 5 | 7.68544    | 19 19 13 13 | -66.19178  | 23 23 23 18 | -4.62013   |
| 20 17 5  | -17.96710  | 10 10 6 6 | 11.46966   | 19 19 14 14 | -65.12389  | 23 23 23 19 | 0.60417    |
| 20 17 6  | -44.65556  | 10 10 7 1 | 0.77464    | 19 19 15 14 | -5.52616   | 23 23 23 20 | 5.09410    |
| 20 17 7  | -71.46872  | 10 10 7 2 | -3.16161   | 19 19 15 15 | -180.23611 | 23 23 23 21 | -0.11002   |
| 20 17 8  | -137.42347 | 10 10 7 3 | 6.04180    | 19 19 16 14 | 42.37770   | 23 23 23 22 | 6.89043    |
| 20 17 9  | 95.82912   | 10 10 7 4 | 4.50782    | 19 19 16 15 | 6.74478    | 23 23 23 23 | 94.91052   |
| 20 18 1  | 9.49211    | 10 10 7 5 | -4.82110   | 19 19 16 16 | -104.57459 | 24 17 1 1   | -18.19448  |
| 20 18 2  | 32.35409   | 10 10 7 6 | -7.69834   | 19 19 17 17 | 222.67229  | 24 17 2 2   | 6.63728    |
| 20 18 3  | -18.34178  | 10 10 7 7 | 3.13889    | 19 19 18 17 | 37.12216   | 24 17 3 3   | 1.80336    |
| 20 18 4  | 79.07409   | 10 10 8 1 | 1.58109    | 19 19 18 18 | 99.28886   | 24 17 4 4   | 2.11849    |



| I J K    | Fl(I,J,K)  | I J K L     | Fl(I,J,K,L) | I J K L     | Fl(I,J,K,L) | I J K L     | Fl(I,J,K,L) |
|----------|------------|-------------|-------------|-------------|-------------|-------------|-------------|
| 22 16 12 | 15.98759   | 12 11 6 6   | -7.18997    | 20 20 8 3   | -1.17749    | 24 21 19 19 | -4.57289    |
| 22 16 13 | -9.69339   | 12 11 7 7   | -0.59341    | 20 20 8 4   | -9.46294    | 24 21 20 20 | -4.52864    |
| 22 17 1  | 13.62544   | 12 11 8 8   | 8.34389     | 20 20 8 5   | 0.40354     | 24 21 21 17 | 15.43265    |
| 22 17 2  | 16.84453   | 12 11 9 9   | 0.59875     | 20 20 8 6   | 2.29771     | 24 21 21 18 | 3.36083     |
| 22 17 3  | 4.08702    | 12 11 10 10 | -12.79517   | 20 20 8 7   | 10.95670    | 24 21 21 19 | -2.28722    |
| 22 17 4  | 26.46448   | 12 11 11 10 | -96.43936   | 20 20 8 8   | 20.91749    | 24 21 21 20 | 0.73076     |
| 22 17 5  | 73.60488   | 12 11 11 11 | 15.37253    | 20 20 9 1   | 1.02058     | 24 21 21 21 | -10.18045   |
| 22 17 6  | 3.15824    | 12 12 1 1   | -262.97221  | 20 20 9 2   | -1.27120    | 24 22 1 1   | 40.60359    |
| 22 17 7  | -17.91705  | 12 12 2 1   | -36.81337   | 20 20 9 3   | 2.10456     | 24 22 2 2   | 49.62834    |
| 22 17 8  | -13.79693  | 12 12 2 2   | -217.96251  | 20 20 9 4   | -4.74607    | 24 22 3 3   | 63.62139    |
| 22 17 9  | 13.98248   | 12 12 3 1   | -27.58024   | 20 20 9 5   | -0.30978    | 24 22 4 4   | -17.18086   |
| 22 18 1  | -8.66539   | 12 12 3 2   | -22.75733   | 20 20 9 6   | -9.60529    | 24 22 5 5   | -21.94201   |
| 22 18 2  | 2.17455    | 12 12 3 3   | -186.63464  | 20 20 9 7   | -11.48914   | 24 22 6 6   | -21.17089   |
| 22 18 3  | 9.71476    | 12 12 4 1   | 2.68638     | 20 20 9 8   | -11.75133   | 24 22 7 7   | -10.26123   |
| 22 18 4  | 98.44844   | 12 12 4 2   | 16.01529    | 20 20 9 9   | 7.62003     | 24 22 8 8   | -24.49864   |
| 22 18 5  | -71.84248  | 12 12 4 3   | 0.45460     | 20 20 10 10 | 2.38188     | 24 22 9 9   | -21.42674   |
| 22 18 6  | -146.14873 | 12 12 4 4   | 2.68071     | 20 20 11 10 | 1.95612     | 24 22 10 10 | -17.97025   |
| 22 18 7  | 85.91481   | 12 12 5 1   | -0.67131    | 20 20 11 11 | 4.60276     | 24 22 11 11 | -15.13177   |
| 22 18 8  | 17.18673   | 12 12 5 2   | 12.98987    | 20 20 12 10 | -3.58524    | 24 22 12 12 | -35.15752   |
| 22 18 9  | -24.49598  | 12 12 5 3   | 5.03788     | 20 20 12 11 | 0.87898     | 24 22 13 13 | -7.94434    |
| 22 19 1  | 15.08514   | 12 12 5 4   | 3.69343     | 20 20 12 12 | 6.48040     | 24 22 14 14 | -17.56264   |
| 22 19 2  | -7.57846   | 12 12 5 5   | 17.36223    | 20 20 13 10 | 5.18450     | 24 22 15 15 | -16.31955   |
| 22 19 3  | 4.75601    | 12 12 6 1   | 5.76479     | 20 20 13 11 | -18.56757   | 24 22 16 16 | -10.24543   |
| 22 19 4  | 33.15084   | 12 12 6 2   | -5.84422    | 20 20 13 12 | 13.34192    | 24 22 17 17 | 40.76391    |
| 22 19 5  | -45.13652  | 12 12 6 3   | 1.24545     | 20 20 13 13 | -62.74939   | 24 22 18 18 | 64.50925    |
| 22 19 6  | -25.83005  | 12 12 6 4   | -8.92281    | 20 20 14 14 | 0.94543     | 24 22 19 19 | 47.63216    |
| 22 19 7  | 63.64608   | 12 12 6 5   | 7.00639     | 20 20 15 14 | 2.15986     | 24 22 20 20 | -17.70508   |
| 22 19 8  | 88.81309   | 12 12 6 6   | 17.24619    | 20 20 15 15 | 5.29713     | 24 22 21 21 | -17.14218   |
| 22 19 9  | -77.16445  | 12 12 7 1   | 6.37794     | 20 20 16 14 | -4.53035    | 24 22 22 17 | -3.32235    |
| 22 20 1  | -45.89047  | 12 12 7 2   | -1.29961    | 20 20 16 15 | 2.70910     | 24 22 22 18 | 5.31736     |
| 22 20 2  | 36.51318   | 12 12 7 3   | 1.46789     | 20 20 16 16 | -0.93659    | 24 22 22 19 | 2.77891     |
| 22 20 3  | -57.70708  | 12 12 7 4   | 2.83839     | 20 20 17 17 | -47.63782   | 24 22 22 20 | -7.00573    |
| 22 20 4  | -70.85874  | 12 12 7 5   | -1.22109    | 20 20 18 17 | -6.77080    | 24 22 22 21 | -6.11357    |
| 22 20 5  | 7.64260    | 12 12 7 6   | -7.80060    | 20 20 18 18 | -19.70486   | 24 22 22 22 | -25.68476   |
| 22 20 6  | -23.76062  | 12 12 7 7   | 11.52277    | 20 20 19 17 | 4.76952     | 24 23 1 1   | -122.25457  |
| 22 20 7  | 25.40734   | 12 12 8 1   | 3.75729     | 20 20 19 18 | 7.98061     | 24 23 2 2   | -91.13804   |
| 22 20 8  | 18.77084   | 12 12 8 2   | -1.88349    | 20 20 19 19 | -36.85324   | 24 23 3 3   | 15.65030    |
| 22 20 9  | 11.12566   | 12 12 8 3   | 0.41231     | 20 20 20 17 | -0.68930    | 24 23 4 4   | 14.72768    |
| 22 21 1  | 61.26943   | 12 12 8 4   | 7.54864     | 20 20 20 18 | 5.99884     | 24 23 5 5   | 42.85839    |
| 22 21 2  | 12.03966   | 12 12 8 5   | 10.51868    | 20 20 20 19 | -3.58584    | 24 23 6 6   | 3.96323     |
| 22 21 3  | -70.81478  | 12 12 8 6   | 11.30719    | 20 20 20 20 | 43.08955    | 24 23 7 7   | 8.07447     |
| 22 21 4  | -33.91376  | 12 12 8 7   | 24.37344    | 21 17 1 1   | 8.11039     | 24 23 8 8   | 72.83183    |
| 22 21 5  | -3.75641   | 12 12 8 8   | 51.72440    | 21 17 2 2   | -6.30631    | 24 23 9 9   | 36.45536    |
| 22 21 6  | -24.21398  | 12 12 9 1   | -3.19510    | 21 17 3 3   | 1.16081     | 24 23 10 10 | -0.68926    |
| 22 21 7  | 1.07571    | 12 12 9 2   | 0.51235     | 21 17 4 4   | -0.32884    | 24 23 11 11 | 42.25434    |
| 22 21 8  | -17.63082  | 12 12 9 3   | 1.95950     | 21 17 5 5   | -1.86645    | 24 23 12 12 | 49.81940    |
| 22 21 9  | 17.39786   | 12 12 9 4   | -8.08902    | 21 17 6 6   | 0.26346     | 24 23 13 13 | 3.00806     |
| 22 22 1  | 17.03924   | 12 12 9 5   | -6.92776    | 21 17 7 7   | 1.85764     | 24 23 14 14 | -1.31828    |
| 22 22 2  | 90.04065   | 12 12 9 6   | -4.90919    | 21 17 8 8   | 0.38593     | 24 23 15 15 | 42.06668    |
| 22 22 3  | -149.10978 | 12 12 9 7   | -27.12333   | 21 17 9 9   | 1.54735     | 24 23 16 16 | 29.25040    |
| 22 22 4  | 11.29794   | 12 12 9 8   | -34.36745   | 21 17 10 10 | 1.13475     | 24 23 17 17 | -121.11184  |
| 22 22 5  | -4.38066   | 12 12 9 9   | 21.24295    | 21 17 11 11 | -1.16238    | 24 23 18 18 | 21.40618    |
| 22 22 6  | 57.58316   | 12 12 10 10 | 160.33603   | 21 17 12 12 | -3.05863    | 24 23 19 19 | -99.00741   |
| 22 22 7  | 22.91539   | 12 12 11 10 | -14.89762   | 21 17 13 13 | 3.81075     | 24 23 20 20 | 30.59535    |
| 22 22 8  | -18.56957  | 12 12 11 11 | 258.83299   | 21 17 14 14 | -0.50991    | 24 23 21 21 | 38.47224    |
| 22 22 9  | 13.36211   | 12 12 12 10 | -48.24777   | 21 17 15 15 | 2.56147     | 24 23 22 22 | -7.70735    |
| 23 14 10 | -5.62124   | 12 12 12 11 | 69.28209    | 21 17 16 16 | -6.41345    | 24 23 23 17 | -7.52985    |
| 23 14 11 | -13.86563  | 12 12 12 12 | 468.34595   | 21 17 17 17 | 8.00190     | 24 23 23 18 | -0.93883    |
| 23 14 12 | -17.42631  | 13 10 1 1   | 10.38128    | 21 18 1 1   | -3.92265    | 24 23 23 19 | 1.35437     |
| 23 14 13 | -2.07864   | 13 10 2 2   | 15.17111    | 21 18 2 2   | -1.36305    | 24 23 23 20 | -6.25756    |
| 23 15 10 | -13.84515  | 13 10 3 3   | -102.97578  | 21 18 3 3   | -5.57667    | 24 23 23 21 | -11.60994   |
| 23 15 11 | -0.62129   | 13 10 4 4   | 10.33474    | 21 18 4 4   | 4.68260     | 24 23 23 22 | -37.68078   |
| 23 15 12 | 11.61376   | 13 10 5 5   | 3.00180     | 21 18 5 5   | 3.14418     | 24 23 23 23 | 72.80748    |
| 23 15 13 | 4.72125    | 13 10 6 6   | 5.52689     | 21 18 6 6   | 2.72065     | 24 24 1 1   | -123.14419  |
| 23 16 10 | -10.96209  | 13 10 7 7   | 1.21893     | 21 18 7 7   | -4.30530    | 24 24 2 1   | 3.83997     |
| 23 16 11 | 13.31690   | 13 10 8 8   | -3.01499    | 21 18 8 8   | -2.87748    | 24 24 2 2   | -106.56723  |
| 23 16 12 | -18.06733  | 13 10 9 9   | -3.29618    | 21 18 9 9   | 0.46638     | 24 24 3 1   | -8.40705    |
| 23 16 13 | 1.08926    | 13 10 10 10 | 73.42559    | 21 18 10 10 | 1.51638     | 24 24 3 2   | -35.69095   |
| 23 17 1  | -5.14506   | 13 11 1 1   | 91.59749    | 21 18 11 11 | 4.35951     | 24 24 3 3   | -46.06896   |
| 23 17 2  | -22.35761  | 13 11 2 2   | 96.99433    | 21 18 12 12 | -2.20368    | 24 24 4 1   | 0.79844     |
| 23 17 3  | -10.63715  | 13 11 3 3   | 21.96456    | 21 18 13 13 | -2.12024    | 24 24 4 2   | 1.22741     |
| 23 17 4  | -113.43754 | 13 11 4 4   | -14.87345   | 21 18 14 14 | 0.11986     | 24 24 4 3   | 4.55627     |
| 23 17 5  | -189.21270 | 13 11 5 5   | -5.77199    | 21 18 15 15 | 5.29726     | 24 24 4 4   | -19.36613   |
| 23 17 6  | 64.94175   | 13 11 6 6   | -7.53082    | 21 18 16 16 | -2.57125    | 24 24 5 1   | 0.75983     |
| 23 17 7  | -20.93972  | 13 11 7 7   | -1.54122    | 21 18 17 17 | -3.85341    | 24 24 5 2   | 3.44116     |
| 23 17 8  | -52.77817  | 13 11 8 8   | -16.91469   | 21 18 18 17 | -1.01345    | 24 24 5 3   | -0.72001    |
| 23 17 9  | 32.53049   | 13 11 9 9   | -9.87223    | 21 18 18 18 | -7.46552    | 24 24 5 4   | 24.85704    |
| 23 18 1  | 7.75725    | 13 11 10 10 | -28.58289   | 21 19 1 1   | 13.84733    | 24 24 5 5   | 54.69779    |
| 23 18 2  | -10.74575  | 13 11 11 10 | -30.11181   | 21 19 2 2   | -2.79120    | 24 24 6 1   | -0.65735    |
| 23 18 3  | 2.32214    | 13 11 11 11 | -124.33200  | 21 19 3 3   | -1.76037    | 24 24 6 2   | 0.36523     |
| 23 18 4  | 46.09096   | 13 12 1 1   | -10.74721   | 21 19 4 4   | -1.84337    | 24 24 6 3   | -3.16872    |
| 23 18 5  | -96.37157  | 13 12 2 2   | -86.75641   | 21 19 5 5   | -9.58382    | 24 24 6 4   | -30.79630   |
| 23 18 6  | -74.99093  | 13 12 3 3   | -91.14665   | 21 19 6 6   | 0.74003     | 24 24 6 5   | -6.85526    |
| 23 18 7  | 108.52114  | 13 12 4 4   | 15.60812    | 21 19 7 7   | 3.69307     | 24 24 6 6   | 15.58164    |
| 23 18 8  | 112.54676  | 13 12 5 5   | 1.96283     | 21 19 8 8   | 6.49985     | 24 24 7 1   | -0.35952    |
| 23 18 9  | -99.84336  | 13 12 6 6   | 9.03111     | 21 19 9 9   | 1.48348     | 24 24 7 2   | 0.73049     |
| 23 19 1  | -24.03838  | 13 12 7 7   | 5.37581     | 21 19 10 10 | 1.63501     | 24 24 7 3   | 1.03974     |
| 23 19 2  | 8.02132    | 13 12 8 8   | 9.26770     | 21 19 11 11 | -12.42245   | 24 24 7 4   | 3.23225     |
| 23 19 3  | 1.26523    | 13 12 9 9   | 6.12886     | 21 19 12 12 | 9.60719     | 24 24 7 5   | -3.15788    |
| 23 19 4  | 43.83590   | 13 12 10 10 | 79.96429    | 21 19 13 13 | -6.39752    | 24 24 7 6   | 5.72793     |

| I  | J  | K  | F(I,J,K)   | I  | J  | K  | L  | F(I,J,,K,L) | I  | J  | K  | L  | F(I,J,K,L) | I  | J  | K  | L  | F(I,J,K,L) |
|----|----|----|------------|----|----|----|----|-------------|----|----|----|----|------------|----|----|----|----|------------|
| 23 | 19 | 5  | -29.71638  | 13 | 12 | 11 | 11 | 46.82185    | 21 | 19 | 14 | 14 | 1.82091    | 24 | 24 | 7  | 7  | 25.55794   |
| 23 | 19 | 6  | -121.78345 | 13 | 12 | 12 | 10 | 24.79167    | 21 | 19 | 15 | 15 | -13.24635  | 24 | 24 | 8  | 1  | -0.44435   |
| 23 | 19 | 7  | -64.36907  | 13 | 12 | 12 | 11 | -116.32556  | 21 | 19 | 16 | 16 | 3.06695    | 24 | 24 | 8  | 3  | 0.30419    |
| 23 | 19 | 8  | -212.31640 | 13 | 12 | 12 | 12 | 76.59186    | 21 | 19 | 17 | 17 | 13.75070   | 24 | 24 | 8  | 4  | 6.66548    |
| 23 | 19 | 9  | 148.90006  | 13 | 13 | 1  | 1  | -46.09739   | 21 | 19 | 18 | 18 | -1.90288   | 24 | 24 | 8  | 5  | 7.55477    |
| 23 | 20 | 1  | 152.68550  | 13 | 13 | 2  | 1  | 38.71477    | 21 | 19 | 19 | 17 | -3.83197   | 24 | 24 | 8  | 6  | 27.75023   |
| 23 | 20 | 2  | -16.17334  | 13 | 13 | 2  | 2  | -74.59832   | 21 | 19 | 19 | 18 | 0.21860    | 24 | 24 | 8  | 7  | 33.53942   |
| 23 | 20 | 3  | -39.76241  | 13 | 13 | 3  | 1  | 20.03246    | 21 | 19 | 19 | 19 | -2.81406   | 24 | 24 | 8  | 8  | 76.73851   |
| 23 | 20 | 4  | -0.99452   | 13 | 13 | 3  | 2  | 1.14166     | 21 | 20 | 1  | 1  | 63.30898   | 24 | 24 | 9  | 1  | 0.33750    |
| 23 | 20 | 5  | -4.04835   | 13 | 13 | 3  | 3  | -61.15808   | 21 | 20 | 2  | 2  | 38.78929   | 24 | 24 | 9  | 2  | -1.82257   |
| 23 | 20 | 6  | -15.95370  | 13 | 13 | 4  | 1  | -1.95488    | 21 | 20 | 3  | 3  | -6.49349   | 24 | 24 | 9  | 4  | 3.47580    |
| 23 | 20 | 7  | -21.73864  | 13 | 13 | 4  | 2  | -10.57139   | 21 | 20 | 4  | 4  | 18.87169   | 24 | 24 | 9  | 5  | 2.48718    |
| 23 | 20 | 8  | -19.77593  | 13 | 13 | 4  | 3  | 1.36477     | 21 | 20 | 5  | 5  | -9.57191   | 24 | 24 | 9  | 6  | -12.86699  |
| 23 | 20 | 9  | 10.07280   | 13 | 13 | 4  | 4  | -62.09680   | 21 | 20 | 6  | 6  | 4.75732    | 24 | 24 | 9  | 7  | -29.69180  |
| 23 | 21 | 1  | -172.42469 | 13 | 13 | 5  | 1  | 1.62342     | 21 | 20 | 7  | 7  | -5.46890   | 24 | 24 | 9  | 8  | -59.08611  |
| 23 | 21 | 2  | 39.28944   | 13 | 13 | 5  | 2  | -5.62069    | 21 | 20 | 8  | 8  | -24.17743  | 24 | 24 | 9  | 9  | 53.17564   |
| 23 | 21 | 3  | -64.29612  | 13 | 13 | 5  | 3  | -6.82855    | 21 | 20 | 9  | 9  | -14.11807  | 24 | 24 | 10 | 10 | 11.61393   |
| 23 | 21 | 4  | 1.69435    | 13 | 13 | 5  | 4  | 3.82046     | 21 | 20 | 10 | 10 | 1.67620    | 24 | 24 | 11 | 10 | 3.16611    |
| 23 | 21 | 5  | 12.69329   | 13 | 13 | 5  | 5  | -4.61315    | 21 | 20 | 11 | 11 | -11.12698  | 24 | 24 | 11 | 11 | 38.85924   |
| 23 | 21 | 6  | 16.82639   | 13 | 13 | 6  | 1  | -5.90838    | 21 | 20 | 12 | 12 | -7.45106   | 24 | 24 | 12 | 10 | -15.36755  |
| 23 | 21 | 7  | 40.11410   | 13 | 13 | 6  | 2  | 4.43725     | 21 | 20 | 13 | 13 | -31.29738  | 24 | 24 | 12 | 11 | 3.38436    |
| 23 | 21 | 8  | 43.47004   | 13 | 13 | 6  | 3  | -4.95201    | 21 | 20 | 14 | 14 | 1.07021    | 24 | 24 | 12 | 12 | 70.41195   |
| 23 | 21 | 9  | -18.90211  | 13 | 13 | 6  | 4  | -37.21511   | 21 | 20 | 15 | 15 | -10.71839  | 24 | 24 | 13 | 10 | -5.01964   |
| 23 | 22 | 1  | 24.66088   | 13 | 13 | 6  | 5  | 0.71508     | 21 | 20 | 16 | 16 | -6.98493   | 24 | 24 | 13 | 11 | -19.44537  |
| 23 | 22 | 2  | -10.88810  | 13 | 13 | 6  | 6  | -25.16493   | 21 | 20 | 17 | 17 | 62.77506   | 24 | 24 | 13 | 12 | 13.04579   |
| 23 | 22 | 3  | -165.74196 | 13 | 13 | 7  | 1  | -4.28093    | 21 | 20 | 18 | 18 | -8.17870   | 24 | 24 | 13 | 13 | 46.68204   |
| 23 | 22 | 4  | 17.11979   | 13 | 13 | 7  | 2  | 1.20886     | 21 | 20 | 19 | 19 | 41.56888   | 24 | 24 | 14 | 14 | 9.19642    |
| 23 | 22 | 5  | 19.69728   | 13 | 13 | 7  | 3  | 2.00138     | 21 | 20 | 20 | 17 | -0.82634   | 24 | 24 | 15 | 14 | -2.11803   |
| 23 | 22 | 6  | -9.85782   | 13 | 13 | 7  | 4  | 2.48673     | 21 | 20 | 20 | 18 | 5.09977    | 24 | 24 | 15 | 15 | 38.88247   |
| 23 | 22 | 7  | 6.90039    | 13 | 13 | 7  | 5  | -4.76249    | 21 | 20 | 20 | 19 | -3.81984   | 24 | 24 | 16 | 14 | -10.69026  |
| 23 | 22 | 8  | -24.55061  | 13 | 13 | 7  | 6  | 0.79567     | 21 | 20 | 20 | 20 | 14.34007   | 24 | 24 | 16 | 15 | 6.06933    |
| 23 | 22 | 9  | 21.59820   | 13 | 13 | 7  | 7  | 1.15467     | 21 | 21 | 1  | 1  | -89.38493  | 24 | 24 | 16 | 16 | 26.67068   |
| 23 | 23 | 1  | 51.98887   | 13 | 13 | 8  | 1  | -3.37788    | 21 | 21 | 2  | 1  | -8.18277   | 24 | 24 | 17 | 17 | -122.20832 |
| 23 | 23 | 2  | 264.36712  | 13 | 13 | 8  | 2  | 1.92846     | 21 | 21 | 2  | 2  | -56.29509  | 24 | 24 | 18 | 17 | -12.20251  |
| 23 | 23 | 3  | 11.02626   | 13 | 13 | 8  | 3  | -1.41197    | 21 | 21 | 3  | 1  | -11.86041  | 24 | 24 | 18 | 18 | -42.60148  |
| 23 | 23 | 4  | -24.72998  | 13 | 13 | 8  | 4  | 9.66325     | 21 | 21 | 3  | 2  | -15.38925  | 24 | 24 | 19 | 17 | -4.78619   |
| 23 | 23 | 5  | -55.30008  | 13 | 13 | 8  | 5  | -12.01704   | 21 | 21 | 3  | 3  | -33.21581  | 24 | 24 | 19 | 18 | 31.35104   |
| 23 | 23 | 6  | 30.35324   | 13 | 13 | 8  | 6  | 8.39802     | 21 | 21 | 4  | 1  | -0.64092   | 24 | 24 | 19 | 19 | -110.80249 |
| 23 | 23 | 8  | -26.08456  | 13 | 13 | 8  | 7  | -3.32081    | 21 | 21 | 4  | 2  | -1.99228   | 24 | 24 | 20 | 17 | -0.63507   |
| 23 | 23 | 9  | 0.47088    | 13 | 13 | 8  | 8  | 1.01952     | 21 | 21 | 4  | 3  | -2.01100   | 24 | 24 | 20 | 18 | -1.45817   |
| 24 | 14 | 10 | 11.47701   | 13 | 13 | 9  | 1  | 0.66144     | 21 | 21 | 4  | 4  | 13.55032   | 24 | 24 | 20 | 19 | -5.00024   |
| 24 | 14 | 11 | 1.60616    | 13 | 13 | 9  | 2  | 2.23060     | 21 | 21 | 5  | 1  | -1.93302   | 24 | 24 | 20 | 20 | -5.77353   |
| 24 | 14 | 12 | 2.59242    | 13 | 13 | 9  | 4  | 11.22775    | 21 | 21 | 5  | 2  | -8.74896   | 24 | 24 | 21 | 17 | 0.73575    |
| 24 | 14 | 13 | 13.16542   | 13 | 13 | 9  | 5  | 4.69488     | 21 | 21 | 5  | 3  | -4.94036   | 24 | 24 | 21 | 18 | -3.08637   |
| 24 | 15 | 11 | -6.95351   | 13 | 13 | 9  | 6  | 1.32972     | 21 | 21 | 5  | 4  | 5.35323    | 24 | 24 | 21 | 19 | 0.73035    |
| 24 | 15 | 12 | -3.32581   | 13 | 13 | 9  | 7  | -3.94628    | 21 | 21 | 5  | 5  | 14.08433   | 24 | 24 | 21 | 20 | -46.36658  |
| 24 | 16 | 10 | 1.34924    | 13 | 13 | 9  | 8  | -10.44633   | 21 | 21 | 6  | 1  | -0.20570   | 24 | 24 | 21 | 21 | 37.94520   |
| 24 | 16 | 12 | -2.75356   | 13 | 13 | 9  | 9  | 2.79488     | 21 | 21 | 6  | 2  | 4.72973    | 24 | 24 | 22 | 18 | -2.92883   |
| 24 | 16 | 13 | -14.10795  | 13 | 13 | 10 | 10 | 49.32476    | 21 | 21 | 6  | 3  | 3.00581    | 24 | 24 | 22 | 19 | -1.29826   |
| 24 | 17 | 1  | -3.15313   | 13 | 13 | 11 | 10 | 24.11663    | 21 | 21 | 6  | 4  | -0.23946   | 24 | 24 | 22 | 20 | 19.20423   |
| 24 | 17 | 2  | -5.12849   | 13 | 13 | 11 | 11 | 79.57656    | 21 | 21 | 6  | 5  | 1.87650    | 24 | 24 | 22 | 21 | 3.97029    |
| 24 | 17 | 3  | -1.39904   | 13 | 13 | 12 | 11 | -51.15776   | 21 | 21 | 6  | 6  | 10.49884   | 24 | 24 | 22 | 22 | 22.71543   |
| 24 | 17 | 4  | -89.29176  | 13 | 13 | 12 | 12 | 108.76342   | 21 | 21 | 7  | 1  | -0.34472   | 24 | 24 | 23 | 18 | -1.04069   |
| 24 | 17 | 5  | -231.73973 | 13 | 13 | 13 | 10 | -9.54863    | 21 | 21 | 7  | 2  | 1.60649    | 24 | 24 | 23 | 19 | -0.55246   |
| 24 | 17 | 6  | 51.27842   | 13 | 13 | 13 | 11 | -30.10282   | 21 | 21 | 7  | 3  | 1.55396    | 24 | 24 | 23 | 21 | -1.80891   |
| 24 | 17 | 7  | -5.85490   | 13 | 13 | 13 | 12 | 38.50043    | 21 | 21 | 7  | 4  | 3.41011    | 24 | 24 | 23 | 22 | -17.80720  |
| 24 | 17 | 8  | -53.86282  | 13 | 13 | 13 | 13 | 247.13859   | 21 | 21 | 7  | 5  | -0.17057   | 24 | 24 | 23 | 23 | 94.63640   |
| 24 | 17 | 9  | 17.62404   | 14 | 14 | 1  | 1  | -50.67300   | 21 | 21 | 7  | 6  | -1.06549   | 24 | 24 | 24 | 17 | 1.01673    |
| 24 | 18 | 1  | 3.69565    | 14 | 14 | 2  | 1  | -31.08992   | 21 | 21 | 7  | 7  | 6.95382    | 24 | 24 | 24 | 18 | -3.50719   |
| 24 | 18 | 2  | 6.34188    | 14 | 14 | 2  | 2  | -69.47987   | 21 | 21 | 8  | 1  | -8.82880   | 24 | 24 | 24 | 19 | -3.22282   |
| 24 | 18 | 3  | -16.34552  | 14 | 14 | 3  | 1  | 10.51458    | 21 | 21 | 8  | 2  | 2.89831    | 24 | 24 | 24 | 20 | -3.56961   |
| 24 | 18 | 4  | -60.20190  | 14 | 14 | 3  | 2  | 87.22612    | 21 | 21 | 8  | 3  | -0.09779   | 24 | 24 | 24 | 21 | -3.90520   |
| 24 | 18 | 5  | 17.75505   | 14 | 14 | 3  | 3  | -230.49909  | 21 | 21 | 8  | 4  | 0.79758    | 24 | 24 | 24 | 22 | -45.54285  |
| 24 | 18 | 6  | 130.98577  | 14 | 14 | 4  | 1  | -1.36732    | 21 | 21 | 8  | 5  | 7.47751    | 24 | 24 | 24 | 23 | 72.12210   |
| 24 | 18 | 7  | -4.57184   | 14 | 14 | 4  | 2  | -1.28810    | 21 | 21 | 8  | 6  | 6.00865    | 24 | 24 | 24 | 24 | 157.55111  |
| 24 | 18 | 8  | 65.04100   | 14 | 14 | 4  | 3  | 2.10407     | 21 | 21 | 8  | 7  | 15.96236   |    |    |    |    |            |
| 24 | 18 | 9  | -35.01239  | 14 | 14 | 4  | 4  | 4.23289     | 21 | 21 | 8  | 8  | 34.38544   |    |    |    |    |            |
| 24 | 19 | 1  | -4.18298   | 14 | 14 | 5  | 2  | 3.08322     | 21 | 21 | 9  | 1  | 8.03068    |    |    |    |    |            |
| 24 | 19 | 2  | 2.74372    | 14 | 14 | 5  | 3  | -2.50044    | 21 | 21 | 9  | 2  | -3.28697   |    |    |    |    |            |

Table S41: The quartic potential energy surface of trans-butadiene-d6. The calculation was done by using B3LYP/6-311++G(2d,2p) method. The force constants (F) are in  $\text{cm}^{-1}$  units.

| I J    | F(I,J)     | I J K    | F(I,J,K)   | I J K L     | F(I,J,K,L) | I J K L     | F(I,J,K,L) |
|--------|------------|----------|------------|-------------|------------|-------------|------------|
| 1 1    | 2403.19204 | 24 18 7  | 72.25110   | 14 14 3 3   | -36.81387  | 21 21 8 8   | 16.27315   |
| 2 2    | 2326.05994 | 24 18 8  | 56.98892   | 14 14 4 1   | 0.39123    | 21 21 9 1   | 2.38542    |
| 3 3    | 2283.22822 | 24 18 9  | -42.62547  | 14 14 4 2   | -2.70771   | 21 21 9 2   | 2.71654    |
| 4 4    | 1632.66662 | 24 19 1  | -8.01276   | 14 14 4 3   | -2.88436   | 21 21 9 3   | -2.61721   |
| 5 5    | 1209.77842 | 24 19 2  | -4.67209   | 14 14 4 4   | -13.53885  | 21 21 9 4   | -4.13593   |
| 6 6    | 1068.71281 | 24 19 3  | -1.00752   | 14 14 5 1   | 1.08047    | 21 21 9 5   | -4.76940   |
| 7 7    | 940.59609  | 24 19 4  | -1.12411   | 14 14 5 2   | -1.50647   | 21 21 9 6   | -2.70024   |
| 8 8    | 747.28761  | 24 19 5  | -23.97655  | 14 14 5 3   | -0.88080   | 21 21 9 7   | 4.56610    |
| 9 9    | 447.72921  | 24 19 6  | 53.00730   | 14 14 5 4   | 1.53242    | 21 21 9 8   | -14.68215  |
| 10 10  | 792.09341  | 24 19 7  | 18.28131   | 14 14 5 5   | -5.53215   | 21 21 9 9   | 14.03621   |
| 11 11  | 741.14370  | 24 19 8  | -153.55940 | 14 14 6 1   | -0.71268   | 21 21 10 10 | 7.37139    |
| 12 12  | 391.75812  | 24 19 9  | 155.65590  | 14 14 6 2   | -0.89503   | 21 21 11 10 | -1.15409   |
| 13 13  | 149.80407  | 24 20 1  | -49.80648  | 14 14 6 4   | -0.35981   | 21 21 11 11 | 3.17069    |
| 14 14  | 828.46073  | 24 20 2  | -16.99913  | 14 14 6 5   | 3.67733    | 21 21 12 10 | -2.28118   |
| 15 15  | 718.29648  | 24 20 3  | 2.10298    | 14 14 6 6   | 0.59009    | 21 21 12 11 | 8.50862    |
| 16 16  | 615.16107  | 24 20 4  | 17.51493   | 14 14 7 1   | 0.27545    | 21 21 12 12 | 11.74299   |
| 17 17  | 2403.08966 | 24 20 5  | -27.67436  | 14 14 7 2   | -0.24146   | 21 21 13 10 | 4.99417    |
| 18 18  | 2327.67118 | 24 20 6  | 15.51164   | 14 14 7 3   | -1.57356   | 21 21 13 11 | 1.19554    |
| 19 19  | 2286.25090 | 24 20 7  | 19.31646   | 14 14 7 4   | -6.73474   | 21 21 13 12 | 1.13198    |
| 20 20  | 1564.33426 | 24 20 8  | 30.62143   | 14 14 7 5   | 4.70556    | 21 21 13 13 | -3.74472   |
| 21 21  | 1070.14285 | 24 20 9  | -47.30788  | 14 14 7 6   | 1.13177    | 21 21 14 14 | 4.94172    |
| 22 22  | 1023.10351 | 24 21 1  | -143.26057 | 14 14 7 7   | 6.29884    | 21 21 15 14 | -0.20090   |
| 23 23  | 757.61651  | 24 21 2  | 54.74976   | 14 14 8 1   | 0.14163    | 21 21 15 15 | 4.78509    |
| 24 24  | 250.66703  | 24 21 3  | -17.35035  | 14 14 8 2   | -0.61897   | 21 21 16 14 | 4.14618    |
| I J K  | F(I,J,K)   | 24 21 4  | -11.37138  | 14 14 8 3   | 0.23620    | 21 21 16 15 | 4.72675    |
| 1 1 1  | -184.01824 | 24 21 5  | 3.10933    | 14 14 8 4   | 0.29748    | 21 21 16 16 | 5.90971    |
| 2 1 1  | 271.82762  | 24 21 6  | 3.45519    | 14 14 8 5   | 4.71438    | 21 21 17 17 | -49.78694  |
| 3 1 1  | 6.97431    | 24 21 7  | 8.96733    | 14 14 8 6   | -1.44444   | 21 21 18 17 | 9.70613    |
| 4 1 1  | 646.92102  | 24 21 8  | 5.54520    | 14 14 8 7   | -1.95469   | 21 21 18 18 | -35.21400  |
| 5 1 1  | -543.52545 | 24 21 9  | -6.89994   | 14 14 8 8   | 0.41736    | 21 21 19 17 | -21.50613  |
| 6 1 1  | -84.26575  | 24 22 1  | -98.12986  | 14 14 9 2   | 0.25740    | 21 21 19 18 | -6.22330   |
| 7 1 1  | 212.41107  | 24 22 2  | -80.47580  | 14 14 9 4   | -1.13768   | 21 21 19 19 | -33.71973  |
| 8 1 1  | -1.22363   | 24 22 3  | 46.31455   | 14 14 9 5   | 1.59427    | 21 21 20 17 | 3.27033    |
| 9 1 1  | 365.22716  | 24 22 4  | 4.90799    | 14 14 9 6   | 0.48077    | 21 21 20 18 | -3.08936   |
| 10 1 1 | -295.40914 | 24 22 5  | 1.52314    | 14 14 9 7   | 3.44018    | 21 21 20 19 | 1.65962    |
| 11 1 1 | 77.08404   | 24 22 6  | -11.21598  | 14 14 9 8   | -3.37145   | 21 21 20 20 | -0.17305   |
| 12 1 1 | -4.79334   | 24 22 7  | -16.67610  | 14 14 9 9   | 2.59103    | 21 21 21 17 | -2.01211   |
| 13 1 1 | 84.78026   | 24 22 8  | -6.76558   | 14 14 10 10 | 47.37399   | 21 21 21 19 | -1.01120   |
| 14 1 1 | 2.15469    | 24 23 1  | 15.65598   | 14 14 11 10 | 14.22759   | 21 21 21 20 | 1.67062    |
| 15 1 1 | -35.91537  | 24 23 2  | -19.56495  | 14 14 11 11 | 25.46560   | 21 21 21 21 | 13.36894   |
| 16 1 1 | 93.89705   | 24 23 3  | 177.29194  | 14 14 12 10 | 25.55572   | 22 17 1 1   | -6.97711   |
| 17 1 1 | 7.14862    | 24 23 4  | 2.05156    | 14 14 12 11 | 20.74590   | 22 17 2 2   | -0.13955   |
| 18 1 1 | -105.09043 | 24 23 5  | 3.24667    | 14 14 12 12 | 61.28689   | 22 17 3 3   | 0.59420    |
| 19 1 1 | 15.03338   | 24 23 6  | -9.37955   | 14 14 13 10 | 32.41999   | 22 17 4 4   | -3.55466   |
| 20 1 1 | 191.52726  | 24 23 7  | 28.08815   | 14 14 13 11 | 9.14994    | 22 17 5 5   | -0.74584   |
| 21 1 1 | -3.25728   | 24 23 8  | 6.20568    | 14 14 13 12 | 26.00748   | 22 17 6 6   | 1.04921    |
| 22 1 1 | 9.11906    | 24 24 1  | 22.43484   | 14 14 13 13 | 42.29466   | 22 17 7 7   | 0.08268    |
| 23 1 1 | 47.97150   | 24 24 2  | -113.17749 | 14 14 14 14 | 38.42123   | 22 17 8 8   | -3.11731   |
| 24 1 1 | -0.34941   | 24 24 3  | 173.79839  | 15 14 1 1   | -43.28942  | 22 17 9 9   | 1.64986    |
| 25 1 1 | 6.63890    | 24 24 4  | -143.67234 | 15 14 2 2   | 45.80266   | 22 17 10 10 | -1.69742   |
| 26 1 1 | 51.74096   | 24 24 5  | -45.66686  | 15 14 3 3   | -14.77730  | 22 17 11 11 | 1.74830    |
| 27 1 1 | 18.41520   | 24 24 6  | 10.11598   | 15 14 4 4   | -2.95424   | 22 17 12 12 | -1.98413   |
| 28 1 1 | 25.05531   | 24 24 7  | -36.59157  | 15 14 5 5   | 2.38375    | 22 17 13 13 | 5.73528    |
| 29 1 1 | 50.17081   | 24 24 8  | 23.93729   | 15 14 6 6   | 3.84982    | 22 17 14 14 | -0.85873   |
| 30 1 1 | 133.62801  | 24 24 9  | -15.27022  | 15 14 7 7   | -5.76955   | 22 17 15 15 | 1.58339    |
| 31 1 1 | 36.75823   | I J K L  | F(I,J,K,L) | 15 14 8 8   | 5.47686    | 22 17 16 16 | -2.43633   |
| 32 1 1 | -24.06997  | 1 1 1 1  | 161.35612  | 15 14 9 9   | 4.01712    | 22 17 17 17 | -6.74507   |
| 33 1 1 | 2.51606    | 2 1 1 1  | -0.86758   | 15 14 10 10 | -20.91930  | 22 18 1 1   | -3.01631   |
| 34 1 1 | -87.80793  | 3 1 1 1  | 29.53977   | 15 14 11 11 | 21.80121   | 22 18 2 2   | -3.37328   |
| 35 1 1 | 100.68977  | 4 1 1 1  | -5.79162   | 15 14 12 12 | 26.10654   | 22 18 3 3   | 1.62807    |
| 36 1 1 | -43.43824  | 5 1 1 1  | 181.48801  | 15 14 13 13 | 7.70274    | 22 18 4 4   | -0.55022   |
| 37 1 1 | -1.37404   | 6 1 1 1  | 29.31218   | 15 14 14 14 | -17.79505  | 22 18 5 5   | 0.30275    |
| 38 1 1 | -3.19672   | 7 1 1 1  | -54.23981  | 15 15 1 1   | -85.39179  | 22 18 7 7   | 1.81161    |
| 39 1 1 | 4.59170    | 8 1 1 1  | 20.58568   | 15 15 2 2   | -19.13469  | 22 18 8 8   | -1.39996   |
| 40 1 1 | -19.64891  | 9 1 1 1  | 81.18437   | 15 15 3 3   | -62.73311  | 22 18 9 9   | -1.89303   |
| 41 1 1 | 16.47901   | 10 1 1 1 | 111.98144  | 15 15 4 4   | 31.79303   | 22 18 10 10 | 0.45178    |
| 42 1 1 | -16.73692  | 11 1 1 1 | 10.36011   | 15 15 5 5   | 14.65002   | 22 18 11 11 | 1.90957    |
| 43 1 1 | -1.25240   | 12 1 1 1 | 72.55181   | 15 15 6 6   | -78.38961  | 22 18 12 12 | -3.14151   |
| 44 1 1 | 16.78253   | 13 1 1 1 | -11.33177  | 15 15 7 7   | 15.15 4 1  | 22 18 13 13 | 2.20300    |
| 45 1 1 | -50.95811  | 14 1 1 1 | -13.68369  | 15 15 8 8   | -2.30037   | 22 18 14 14 | 0.22565    |
| 46 1 1 | 11.84227   | 15 1 1 1 | 92.19791   | 15 15 9 9   | -7.03662   | 22 18 15 15 | 3.28971    |
| 47 1 1 | -32.77374  | 16 1 1 1 | -6.97361   | 15 15 10 10 | 7.65024    | 22 18 16 16 | -1.53460   |
| 48 1 1 | 24.61206   | 17 1 1 1 | 10.29994   | 15 15 11 11 | -2.66908   | 22 18 17 17 | -2.96183   |
| 49 1 1 | 25.80146   | 18 1 1 1 | 0.92011    | 15 15 12 12 | -0.52682   | 22 18 18 18 | -0.30659   |
| 50 1 1 | -16.80937  | 19 1 1 1 | 17.45331   | 15 15 13 13 | -2.90125   | 22 18 19 19 | -3.24366   |
| 51 1 1 | -39.53483  | 20 1 1 1 | -19.26650  | 15 15 14 14 | -0.57741   | 22 18 20 20 | 5.45685    |
| 52 1 1 | -31.60633  | 21 1 1 1 | 2.63100    | 15 15 15 15 | 1.35745    | 22 19 1 1   | -6.78565   |
| 53 1 1 | 57.30608   | 22 1 1 1 | -0.25276   | 15 15 16 16 | 1.57474    | 22 19 2 2   | -9.60745   |
| 54 1 1 | -6.26722   | 23 1 1 1 | 11.96029   | 15 15 17 17 | -0.53739   | 22 19 3 3   | -1.69491   |
| 55 1 1 | 28.94921   | 24 1 1 1 | -16.47470  | 15 15 18 18 | 1.44074    | 22 19 4 4   | 1.23991    |
| 56 1 1 | 3.39660    | 25 1 1 1 | -3.92962   | 15 15 19 19 | 1.96700    | 22 19 5 5   | 0.46201    |
| 57 1 1 | 22.57136   | 26 1 1 1 | -0.64844   | 15 15 20 20 | 3.70139    | 22 19 6 6   | 0.86351    |
| 58 1 1 | 4.01286    | 27 1 1 1 | -6.91919   | 15 15 21 21 | 6.74225    | 22 19 7 7   | 2.41953    |
| 59 1 1 |            | 28 1 1 1 |            | 15 15 22 22 | -1.31160   | 22 19 8 8   | 1.38555    |
| 60 1 1 |            | 29 1 1 1 |            | 15 15 23 23 | -2.39647   | 22 19 9 9   | 0.98817    |
| 61 1 1 |            | 30 1 1 1 |            | 15 15 24 24 |            | 22 19 10 10 |            |









| I J K    | F(I,J,K)   | I J K L   | F(I,J,,K,L) | I J K L     | F(I,J,K,L) | I J K L     | F(I,J,K,L) |
|----------|------------|-----------|-------------|-------------|------------|-------------|------------|
| 18 14 12 | 128.24324  | 9 7 6 6   | -2.54317    | 19 17 6 6   | 19.54624   | 23 23 4 2   | -6.06532   |
| 18 14 13 | 167.99222  | 9 7 7 1   | 0.77653     | 19 17 7 7   | 6.71336    | 23 23 4 3   | 5.05261    |
| 18 15 10 | -86.11417  | 9 7 7 2   | 3.40050     | 19 17 8 8   | -18.13781  | 23 23 4 4   | 1.05963    |
| 18 15 11 | -170.43420 | 9 7 7 3   | 0.78636     | 19 17 9 9   | 3.26701    | 23 23 5 1   | 2.05217    |
| 18 15 12 | -57.72258  | 9 7 7 4   | -2.97593    | 19 17 10 10 | -22.98714  | 23 23 5 2   | -4.27586   |
| 18 15 13 | 5.16200    | 9 7 7 5   | 3.75955     | 19 17 11 11 | 39.97238   | 23 23 5 3   | 1.61172    |
| 18 16 10 | 53.93176   | 9 7 7 6   | 2.71264     | 19 17 12 12 | -39.71615  | 23 23 5 4   | -2.48884   |
| 18 16 11 | 31.28737   | 9 7 7 7   | 10.33796    | 19 17 13 13 | 29.49798   | 23 23 5 5   | 7.82042    |
| 18 16 12 | -68.21644  | 9 8 1 1   | 46.53305    | 19 17 14 14 | -1.11090   | 23 23 6 1   | -0.92576   |
| 18 16 13 | -13.17710  | 9 8 2 2   | 12.85780    | 19 17 15 15 | 30.93199   | 23 23 6 2   | -3.39377   |
| 18 17 1  | 264.51457  | 9 8 3 3   | 33.24473    | 19 17 16 16 | -47.32792  | 23 23 6 3   | 4.27087    |
| 18 17 2  | -4.32609   | 9 8 4 4   | -1.72143    | 19 17 17 17 | 35.07040   | 23 23 6 4   | 2.04846    |
| 18 17 3  | -111.99173 | 9 8 5 5   | -0.60970    | 19 18 1 1   | -52.95614  | 23 23 6 5   | 8.68688    |
| 18 17 4  | -5.32632   | 9 8 6 6   | -12.51864   | 19 18 2 2   | 80.66402   | 23 23 6 6   | 13.39520   |
| 18 17 5  | -12.03304  | 9 8 7 7   | -5.21232    | 19 18 3 3   | -13.87734  | 23 23 7 1   | 0.21570    |
| 18 17 6  | -2.78040   | 9 8 8 2   | 0.59039     | 19 18 4 4   | -9.49076   | 23 23 7 2   | -0.38934   |
| 18 17 7  | 6.06764    | 9 8 8 3   | 0.24503     | 19 18 5 5   | -1.26920   | 23 23 7 3   | -2.53032   |
| 18 17 8  | -5.34169   | 9 8 8 4   | -0.43542    | 19 18 6 6   | 17.44795   | 23 23 7 4   | -10.86503  |
| 18 17 9  | 8.42973    | 9 8 8 5   | -10.35017   | 19 18 7 7   | -33.61236  | 23 23 7 5   | 7.08876    |
| 18 18 1  | 28.97250   | 9 8 8 6   | 1.41974     | 19 18 8 8   | 14.51110   | 23 23 7 6   | -0.53164   |
| 18 18 2  | 637.32749  | 9 8 8 7   | 2.97991     | 19 18 9 9   | 12.12802   | 23 23 7 7   | 29.63031   |
| 18 18 3  | 199.94950  | 9 8 8 8   | -20.97055   | 19 18 10 10 | -37.90998  | 23 23 8 1   | 0.88537    |
| 18 18 4  | 89.89406   | 9 9 1 1   | -41.82836   | 19 18 11 11 | 28.23473   | 23 23 8 2   | 1.11851    |
| 18 18 5  | 50.90549   | 9 9 2 1   | -5.04354    | 19 18 12 12 | 12.16889   | 23 23 8 3   | 1.16188    |
| 18 18 6  | -9.68455   | 9 9 2 2   | -16.44965   | 19 18 13 13 | 4.67028    | 23 23 8 4   | 2.93004    |
| 18 18 7  | -9.22746   | 9 9 3 1   | 3.81699     | 19 18 14 14 | -29.64120  | 23 23 8 5   | 3.48077    |
| 18 18 8  | -19.30385  | 9 9 3 2   | 12.09921    | 19 18 15 15 | 15.60339   | 23 23 8 6   | -1.06664   |
| 18 18 9  | -11.07694  | 9 9 3 3   | -33.81499   | 19 18 16 16 | 19.78867   | 23 23 8 7   | -7.78536   |
| 19 14 10 | 38.91265   | 9 9 4 1   | 0.13339     | 19 18 17 17 | -51.08031  | 23 23 8 8   | 25.44966   |
| 19 14 11 | 125.50182  | 9 9 4 2   | -4.49934    | 19 18 18 18 | -27.59740  | 23 23 9 1   | -0.73686   |
| 19 14 12 | 101.03799  | 9 9 4 3   | 5.02484     | 19 18 19 19 | 77.91699   | 23 23 9 2   | 0.29553    |
| 19 14 13 | -17.08954  | 9 9 4 4   | -5.55423    | 19 19 1 1   | 111.35247  | 23 23 9 3   | -0.20122   |
| 19 15 10 | -131.62565 | 9 9 5 1   | 1.21041     | 19 19 2 1   | 10.38438   | 23 23 9 4   | -3.49179   |
| 19 15 11 | 157.49796  | 9 9 5 2   | -2.34085    | 19 19 2 2   | 73.17202   | 23 23 9 5   | 0.44481    |
| 19 15 12 | -80.84608  | 9 9 5 3   | 3.89524     | 19 19 3 1   | -11.46664  | 23 23 9 6   | 6.12636    |
| 19 15 13 | -191.42873 | 9 9 5 4   | 6.08694     | 19 19 3 2   | -13.02898  | 23 23 9 7   | 12.27550   |
| 19 16 10 | -71.99058  | 9 9 5 5   | 2.15584     | 19 19 3 3   | 91.76915   | 23 23 9 8   | -24.21541  |
| 19 16 11 | 13.18317   | 9 9 6 1   | 1.59309     | 19 19 4 1   | -0.09834   | 23 23 9 9   | 28.33687   |
| 19 16 12 | 234.20550  | 9 9 6 2   | -1.04736    | 19 19 4 2   | 12.07657   | 23 23 10 10 | 12.48813   |
| 19 16 13 | 41.40566   | 9 9 6 3   | 3.56203     | 19 19 4 3   | -16.30755  | 23 23 11 10 | 1.41708    |
| 19 17 1  | -537.94798 | 9 9 6 4   | 4.05278     | 19 19 4 4   | -2.53473   | 23 23 11 11 | 13.08131   |
| 19 17 2  | -91.85513  | 9 9 6 5   | 8.59163     | 19 19 5 1   | -1.56069   | 23 23 12 10 | 3.35362    |
| 19 17 3  | -13.81708  | 9 9 6 6   | 15.75550    | 19 19 5 2   | 10.20100   | 23 23 12 11 | 4.77962    |
| 19 17 4  | 4.16527    | 9 9 7 1   | -1.25524    | 19 19 5 3   | -6.43932   | 23 23 12 12 | 30.03597   |
| 19 17 5  | -0.34735   | 9 9 7 2   | 2.46135     | 19 19 5 4   | 1.21854    | 23 23 13 10 | 8.78127    |
| 19 17 6  | 5.14362    | 9 9 7 4   | -3.87756    | 19 19 5 5   | -14.38160  | 23 23 13 11 | -3.86671   |
| 19 17 7  | -8.09591   | 9 9 7 5   | 1.02169     | 19 19 6 1   | 0.14467    | 23 23 13 12 | 11.62049   |
| 19 17 8  | 3.65834    | 9 9 7 6   | -5.57991    | 19 19 6 2   | 5.22497    | 23 23 13 13 | 6.11628    |
| 19 17 9  | -11.42047  | 9 9 7 7   | 8.02174     | 19 19 6 3   | -12.00375  | 23 23 14 14 | 8.97956    |
| 19 18 1  | -105.11546 | 9 9 8 2   | 0.31535     | 19 19 6 4   | -6.65285   | 23 23 15 14 | -1.51953   |
| 19 18 2  | 207.67050  | 9 9 8 3   | 0.43569     | 19 19 6 5   | -14.48779  | 23 23 15 15 | 15.00961   |
| 19 18 3  | 364.38471  | 9 9 8 4   | -2.41264    | 19 19 6 6   | -33.19292  | 23 23 16 14 | 3.56519    |
| 19 18 4  | -33.47585  | 9 9 8 5   | 7.27955     | 19 19 7 1   | 1.33097    | 23 23 16 15 | 1.53394    |
| 19 18 5  | 5.90356    | 9 9 8 6   | -4.64829    | 19 19 7 2   | -0.28225   | 23 23 16 16 | 9.30894    |
| 19 18 6  | -21.89795  | 9 9 8 7   | -0.83597    | 19 19 7 3   | 3.21052    | 23 23 17 17 | -47.44588  |
| 19 18 7  | -7.07585   | 9 9 8 8   | 21.36156    | 19 19 7 4   | 11.79373   | 23 23 18 17 | 2.14607    |
| 19 18 8  | 1.15551    | 9 9 9 1   | 0.96298     | 19 19 7 5   | -3.68986   | 23 23 18 18 | -61.12806  |
| 19 18 9  | -0.92356   | 9 9 9 2   | 0.82109     | 19 19 7 6   | 6.37605    | 23 23 19 17 | -1.24227   |
| 19 19 1  | -0.25231   | 9 9 9 3   | -1.06636    | 19 19 7 7   | -23.63885  | 23 23 19 18 | -12.08192  |
| 19 19 2  | 364.70637  | 9 9 9 4   | 1.41149     | 19 19 8 1   | -6.26091   | 23 23 19 19 | -48.07357  |
| 19 19 3  | -291.41143 | 9 9 9 5   | -0.60687    | 19 19 8 2   | -1.85645   | 23 23 20 17 | 1.98244    |
| 19 19 4  | 95.65694   | 9 9 9 6   | 12.32500    | 19 19 8 3   | 0.55756    | 23 23 20 18 | -9.20101   |
| 19 19 5  | 51.51235   | 9 9 9 7   | 0.47249     | 19 19 8 4   | -1.71181   | 23 23 20 19 | 4.55400    |
| 19 19 6  | 16.43348   | 9 9 9 8   | -23.66549   | 19 19 8 5   | -10.21159  | 23 23 20 20 | 0.60204    |
| 19 19 7  | 3.97853    | 9 9 9 9   | 34.44953    | 19 19 8 6   | 8.27085    | 23 23 21 17 | 1.49742    |
| 19 19 8  | -11.19228  | 10 10 1 1 | -41.90886   | 19 19 8 7   | 0.16562    | 23 23 21 18 | -2.18680   |
| 19 19 9  | -4.42953   | 10 10 2 1 | 18.06796    | 19 19 8 8   | -35.78172  | 23 23 21 19 | 3.18968    |
| 20 14 10 | 23.45734   | 10 10 2 2 | -89.95918   | 19 19 9 1   | 7.86932    | 23 23 21 20 | -0.44760   |
| 20 14 11 | -6.56933   | 10 10 3 1 | -24.56240   | 19 19 9 2   | 1.62349    | 23 23 21 21 | 21.82757   |
| 20 14 12 | 24.81284   | 10 10 3 2 | -36.89737   | 19 19 9 3   | -0.76901   | 23 23 22 17 | -1.84263   |
| 20 14 13 | -69.27971  | 10 10 3 3 | -46.74428   | 19 19 9 4   | 0.53364    | 23 23 22 18 | -0.93170   |
| 20 15 11 | -17.00946  | 10 10 4 1 | 2.98043     | 19 19 9 5   | 2.96513    | 23 23 22 19 | 4.56940    |
| 20 15 12 | -0.70422   | 10 10 4 2 | -4.54422    | 19 19 9 6   | -15.55577  | 23 23 22 20 | 7.91013    |
| 20 15 13 | -14.48337  | 10 10 4 3 | -0.82163    | 19 19 9 7   | -1.47272   | 23 23 22 21 | -0.51553   |
| 20 16 10 | -3.68183   | 10 10 4 4 | -4.42464    | 19 19 9 8   | 32.86756   | 23 23 22 22 | 17.00151   |
| 20 16 11 | 4.47127    | 10 10 5 1 | 0.95537     | 19 19 9 9   | -33.38566  | 23 23 23 17 | -1.06233   |
| 20 16 12 | -53.28130  | 10 10 5 2 | -3.87507    | 19 19 10 10 | -46.76346  | 23 23 23 18 | -0.22409   |
| 20 16 13 | 32.05929   | 10 10 5 3 | -1.39948    | 19 19 11 10 | 8.68450    | 23 23 23 19 | -0.95922   |
| 20 17 1  | 86.63175   | 10 10 5 4 | -2.63952    | 19 19 11 11 | -77.76496  | 23 23 23 20 | -6.65602   |
| 20 17 2  | -13.03967  | 10 10 5 5 | 1.42107     | 19 19 12 10 | 9.25612    | 23 23 23 21 | 9.21951    |
| 20 17 3  | 6.98105    | 10 10 6 1 | -1.41084    | 19 19 12 11 | 7.78874    | 23 23 23 22 | -11.24022  |
| 20 17 4  | 11.20597   | 10 10 6 2 | 0.59035     | 19 19 12 12 | -109.34191 | 23 23 23 23 | 48.31685   |
| 20 17 5  | 24.14443   | 10 10 6 3 | 0.83359     | 19 19 13 10 | -27.01797  | 24 17 1 1   | -21.41050  |
| 20 17 6  | -18.87424  | 10 10 6 4 | 0.49199     | 19 19 13 11 | 38.60342   | 24 17 2 2   | 3.34120    |
| 20 17 7  | 1.88760    | 10 10 6 5 | 2.69289     | 19 19 13 12 | -35.26876  | 24 17 3 3   | 9.88475    |
| 20 17 8  | 51.09923   | 10 10 6 6 | -0.55995    | 19 19 13 13 | -46.16111  | 24 17 4 4   | -0.59207   |
| 20 17 9  | -46.06249  | 10 10 7 1 | 0.17157     | 19 19 14 14 | -36.65384  | 24 17 5 5   | -2.14588   |
| 20 18 1  | -4.61571   | 10 10 7 2 | 1.73902     | 19 19 15 14 | -14.50489  | 24 17 6 6   | 5.82503    |
| 20 18 2  | 112.38843  | 10 10 7 3 | -0.22828    | 19 19 15 15 | -77.97533  | 24 17 7 7   | 0.98810    |
| 20 18 3  | -29.09561  | 10 10 7 4 | -5.05826    | 19 19 16 14 | -13.94534  | 24 17 8 8   | 2.39425    |

| I J K    | F(I,J,K)  | I J K L     | F(I,J,,K,L) | I J K L     | F(I,J,K,L) | I J K L     | F(I,J,K,L) |
|----------|-----------|-------------|-------------|-------------|------------|-------------|------------|
| 20 18 4  | -90.94524 | 10 10 7 5   | 4.11140     | 19 19 16 15 | 1.51677    | 24 17 9 9   | 1.14770    |
| 20 18 5  | 6.13021   | 10 10 7 6   | 1.04849     | 19 19 16 16 | -54.02165  | 24 17 11 11 | 3.21730    |
| 20 18 6  | -7.41487  | 10 10 7 7   | 6.49574     | 19 19 17 17 | 110.42209  | 24 17 12 12 | -0.50341   |
| 20 18 7  | 22.98395  | 10 10 8 1   | -0.39564    | 19 19 18 17 | 12.04092   | 24 17 15 15 | 3.50160    |
| 20 18 8  | 14.10861  | 10 10 8 2   | -0.18759    | 19 19 18 18 | 73.74995   | 24 17 16 16 | 0.26137    |
| 20 18 9  | 19.39658  | 10 10 8 3   | 1.53369     | 19 19 19 17 | -11.01009  | 24 17 17 17 | -20.88010  |
| 20 19 1  | 5.31735   | 10 10 8 4   | 4.07399     | 19 19 19 18 | -13.25152  | 24 18 1 1   | -5.45202   |
| 20 19 2  | -28.68689 | 10 10 8 5   | 2.76611     | 19 19 19 19 | 91.52603   | 24 18 2 2   | 3.62519    |
| 20 19 3  | 116.04849 | 10 10 8 6   | 1.70489     | 20 17 1 1   | -9.23279   | 24 18 3 3   | 1.05944    |
| 20 19 4  | 32.53394  | 10 10 8 7   | -2.30669    | 20 17 2 2   | -0.28419   | 24 18 4 4   | -0.90288   |
| 20 19 5  | 41.94435  | 10 10 8 8   | 4.90424     | 20 17 3 3   | -1.58553   | 24 18 5 5   | 5.16281    |
| 20 19 6  | 25.21192  | 10 10 9 1   | -0.72521    | 20 17 4 4   | 1.65806    | 24 18 6 6   | -0.56042   |
| 20 19 7  | 19.01090  | 10 10 9 2   | 2.11183     | 20 17 5 5   | 2.95668    | 24 18 7 7   | 2.44134    |
| 20 19 8  | -13.03521 | 10 10 9 3   | -0.71502    | 20 17 6 6   | -1.98512   | 24 18 8 8   | 0.31027    |
| 20 19 9  | 9.34728   | 10 10 9 4   | -2.65807    | 20 17 7 7   | 0.72301    | 24 18 9 9   | -0.98559   |
| 20 20 1  | 5.95985   | 10 10 9 5   | -1.21003    | 20 17 8 8   | 2.59438    | 24 18 10 10 | 1.81590    |
| 20 20 2  | -84.25788 | 10 10 9 6   | -1.46083    | 20 17 9 9   | 0.51220    | 24 18 11 11 | -0.52355   |
| 20 20 3  | 42.98568  | 10 10 9 7   | 5.21534     | 20 17 10 10 | 4.38479    | 24 18 12 12 | -0.58145   |
| 20 20 4  | 255.86625 | 10 10 9 8   | -4.98519    | 20 17 11 11 | -3.96652   | 24 18 13 13 | -1.53413   |
| 20 20 5  | 72.12499  | 10 10 9 9   | 4.18218     | 20 17 12 12 | 10.63715   | 24 18 14 14 | 1.41467    |
| 20 20 6  | -28.05153 | 10 10 10 10 | 63.27314    | 20 17 13 13 | -7.08677   | 24 18 15 15 | 0.57405    |
| 20 20 7  | 60.66837  | 11 10 1 1   | 39.37795    | 20 17 14 14 | 0.67514    | 24 18 16 16 | 2.00448    |
| 20 20 8  | -63.52892 | 11 10 2 2   | -41.04039   | 20 17 15 15 | -2.44857   | 24 18 17 17 | -5.75888   |
| 20 20 9  | -33.12288 | 11 10 3 3   | 8.80456     | 20 17 16 16 | 9.15225    | 24 18 18 18 | 3.04766    |
| 21 14 10 | 1.08003   | 11 10 4 4   | 5.89109     | 20 17 17 17 | -10.12701  | 24 18 19 19 | 3.89438    |
| 21 14 11 | 13.35246  | 11 10 5 5   | -0.27352    | 20 18 1 1   | 11.23599   | 24 19 1 1   | 3.30219    |
| 21 14 12 | -5.61591  | 11 10 6 6   | -2.48863    | 20 18 2 2   | 24.17197   | 24 19 2 2   | -2.95529   |
| 21 14 13 | -2.02949  | 11 10 7 7   | 3.65054     | 20 18 3 3   | 15.62381   | 24 19 3 3   | -2.80243   |
| 21 15 10 | -13.99355 | 11 10 8 8   | -4.72424    | 20 18 4 4   | -18.69008  | 24 19 4 4   | 2.50304    |
| 21 15 11 | 24.49307  | 11 10 9 9   | -2.72143    | 20 18 5 5   | 1.57535    | 24 19 5 5   | -2.80156   |
| 21 15 12 | 9.95764   | 11 10 10 10 | 11.01652    | 20 18 6 6   | -1.60673   | 24 19 6 6   | 2.82207    |
| 21 15 13 | -33.55134 | 11 11 1 1   | -87.61338   | 20 18 7 7   | -7.35263   | 24 19 7 7   | 1.35226    |
| 21 16 10 | 1.40063   | 11 11 2 1   | -26.26995   | 20 18 8 8   | -4.75417   | 24 19 8 8   | 0.57481    |
| 21 16 11 | 14.39565  | 11 11 2 2   | -48.37126   | 20 18 9 9   | -5.07489   | 24 19 9 9   | -2.18039   |
| 21 16 12 | -15.42527 | 11 11 3 1   | 41.15925    | 20 18 10 10 | -6.59481   | 24 19 10 10 | -0.39187   |
| 21 16 13 | -35.28573 | 11 11 3 2   | 26.71936    | 20 18 11 11 | -8.01841   | 24 19 11 11 | 1.93676    |
| 21 17 1  | -43.84645 | 11 11 3 3   | -78.03591   | 20 18 12 12 | -16.22121  | 24 19 12 12 | -0.70037   |
| 21 17 2  | -7.44177  | 11 11 4 1   | -3.92826    | 20 18 13 13 | 12.23295   | 24 19 14 14 | 0.78121    |
| 21 17 3  | 2.36842   | 11 11 4 2   | -6.46335    | 20 18 14 14 | -3.44959   | 24 19 15 15 | 1.61001    |
| 21 17 4  | 14.18488  | 11 11 4 3   | 8.68661     | 20 18 15 15 | -9.52491   | 24 19 16 16 | -1.15279   |
| 21 17 5  | 47.09519  | 11 11 4 4   | -4.55862    | 20 18 16 16 | -3.80538   | 24 19 17 17 | 3.94495    |
| 21 17 6  | 14.13588  | 11 11 5 1   | -0.25730    | 20 18 17 17 | 11.15860   | 24 19 18 18 | -3.28273   |
| 21 17 7  | 6.03582   | 11 11 5 2   | -1.68534    | 20 18 18 17 | 0.63049    | 24 19 19 17 | 10.39203   |
| 21 17 8  | 99.86014  | 11 11 5 4   | 0.51193     | 20 18 18 18 | 24.04114   | 24 19 19 18 | 1.12823    |
| 21 17 9  | -90.76540 | 11 11 5 5   | 0.26162     | 20 19 1 1   | -21.45814  | 24 19 19 19 | -2.98198   |
| 21 18 1  | -9.66665  | 11 11 6 1   | 1.79494     | 20 19 2 2   | 5.33735    | 24 20 1 1   | 3.30972    |
| 21 18 2  | -0.50065  | 11 11 6 2   | 1.19941     | 20 19 3 3   | -18.30904  | 24 20 2 2   | -15.25358  |
| 21 18 3  | -6.48742  | 11 11 6 3   | -1.93383    | 20 19 4 4   | 8.17677    | 24 20 3 3   | -5.57651   |
| 21 18 4  | 34.21012  | 11 11 6 4   | 2.73045     | 20 19 5 5   | 1.72012    | 24 20 4 4   | 8.83720    |
| 21 18 5  | -37.71815 | 11 11 6 5   | 2.99509     | 20 19 6 6   | 3.71751    | 24 20 5 5   | -8.27282   |
| 21 18 6  | -39.17250 | 11 11 6 6   | 7.40250     | 20 19 7 7   | -2.99105   | 24 20 6 6   | 3.84455    |
| 21 18 7  | -59.14860 | 11 11 7 1   | -1.79398    | 20 19 8 8   | 8.55947    | 24 20 7 7   | 6.78860    |
| 21 18 8  | 11.97130  | 11 11 7 2   | -1.59675    | 20 19 9 9   | 6.79874    | 24 20 8 8   | -2.81175   |
| 21 18 9  | -30.52358 | 11 11 7 3   | 1.33505     | 20 19 10 10 | -1.51510   | 24 20 9 9   | 2.63998    |
| 21 19 1  | 1.89255   | 11 11 7 4   | -2.26785    | 20 19 11 11 | 9.32588    | 24 20 10 10 | -0.43186   |
| 21 19 2  | -5.80012  | 11 11 7 5   | -0.21482    | 20 19 12 12 | 17.80325   | 24 20 11 11 | 4.90231    |
| 21 19 3  | 21.91092  | 11 11 7 6   | -2.30815    | 20 19 13 13 | -8.36541   | 24 20 12 12 | -1.21693   |
| 21 19 4  | 35.07870  | 11 11 7 7   | 2.02625     | 20 19 14 14 | -3.33005   | 24 20 13 13 | 2.28877    |
| 21 19 5  | 15.27036  | 11 11 8 1   | -0.89685    | 20 19 15 15 | 8.37769    | 24 20 14 14 | 1.13434    |
| 21 19 6  | 36.83300  | 11 11 8 2   | 2.25574     | 20 19 16 16 | 11.02554   | 24 20 15 15 | 4.22893    |
| 21 19 7  | -49.44284 | 11 11 8 3   | -2.92256    | 20 19 17 17 | -21.23211  | 24 20 16 16 | -4.17753   |
| 21 19 8  | 42.21576  | 11 11 8 4   | -1.03671    | 20 19 18 18 | 5.17462    | 24 20 17 17 | 4.18582    |
| 21 19 9  | -38.70589 | 11 11 8 5   | -0.41912    | 20 19 19 17 | -1.48708   | 24 20 18 18 | -15.34482  |
| 21 20 1  | 19.47462  | 11 11 8 6   | -6.94840    | 20 19 19 18 | 15.72834   | 24 20 19 19 | -5.72262   |
| 21 20 2  | 24.39037  | 11 11 8 7   | 1.78719     | 20 19 19 19 | -18.16700  | 24 20 20 17 | -2.67931   |
| 21 20 3  | 37.96704  | 11 11 8 8   | 9.55632     | 20 20 1 1   | -7.21288   | 24 20 20 18 | -0.69376   |
| 21 20 4  | -12.59903 | 11 11 9 1   | 2.03374     | 20 20 2 1   | -2.09132   | 24 20 20 19 | 2.21471    |
| 21 20 5  | -9.92692  | 11 11 9 3   | 0.64595     | 20 20 2 2   | -0.82274   | 24 20 20 20 | 5.94664    |
| 21 20 6  | 13.05207  | 11 11 9 4   | 2.38258     | 20 20 3 1   | 1.42429    | 24 21 1 1   | 31.35062   |
| 21 20 7  | -4.48640  | 11 11 9 5   | 0.95898     | 20 20 3 2   | -5.08645   | 24 21 2 2   | 18.74963   |
| 21 20 8  | 5.86899   | 11 11 9 6   | 9.25005     | 20 20 3 3   | -1.57704   | 24 21 3 3   | 16.00824   |
| 21 20 9  | 3.02499   | 11 11 9 7   | -1.94405    | 20 20 4 1   | 0.88609    | 24 21 4 4   | -9.69981   |
| 21 21 1  | 61.96787  | 11 11 9 8   | -11.41423   | 20 20 4 2   | -18.13295  | 24 21 5 5   | -9.11035   |
| 21 21 2  | -64.79950 | 11 11 9 9   | 12.61601    | 20 20 4 3   | 9.46103    | 24 21 6 6   | 2.49881    |
| 21 21 3  | 24.05571  | 11 11 10 10 | 25.43923    | 20 20 4 4   | 45.19520   | 24 21 7 7   | -9.10997   |
| 21 21 4  | -2.43930  | 11 11 11 10 | -12.81076   | 20 20 5 1   | 4.36368    | 24 21 8 8   | -16.68299  |
| 21 21 5  | 8.56371   | 11 11 11 11 | 93.71514    | 20 20 5 2   | -1.43411   | 24 21 9 9   | -7.09933   |
| 21 21 6  | 17.21449  | 12 10 1 1   | 60.31096    | 20 20 5 3   | 6.58495    | 24 21 10 10 | -12.04236  |
| 21 21 7  | -1.77426  | 12 10 2 2   | -67.11983   | 20 20 5 4   | 13.34264   | 24 21 11 11 | 1.57958    |
| 21 21 8  | -17.28070 | 12 10 3 3   | 10.05223    | 20 20 5 5   | -2.26392   | 24 21 12 12 | -22.85461  |
| 21 21 9  | 10.98745  | 12 10 4 4   | -0.31746    | 20 20 6 1   | -3.02107   | 24 21 13 13 | 5.97735    |
| 22 14 10 | -2.69802  | 12 10 5 5   | -1.91010    | 20 20 6 2   | -0.95959   | 24 21 14 14 | -5.64366   |
| 22 14 11 | 1.80336   | 12 10 6 6   | 0.27338     | 20 20 6 3   | 2.87377    | 24 21 15 15 | -1.06906   |
| 22 14 12 | 8.53247   | 12 10 7 7   | 8.28637     | 20 20 6 4   | -6.77229   | 24 21 16 16 | -14.65124  |
| 22 15 10 | -8.41621  | 12 10 8 8   | -10.00200   | 20 20 6 5   | 3.88591    | 24 21 17 17 | 33.02656   |
| 22 15 11 | 25.57274  | 12 10 9 9   | -4.14942    | 20 20 6 6   | -1.46574   | 24 21 18 18 | 16.13870   |
| 22 15 12 | 16.47660  | 12 10 10 10 | 15.22646    | 20 20 7 2   | 1.21973    | 24 21 19 19 | 15.76522   |
| 22 15 13 | -15.75453 | 12 11 1 1   | -7.80524    | 20 20 7 3   | 2.65073    | 24 21 20 20 | -9.07077   |
| 22 16 10 | -2.16927  | 12 11 2 2   | -24.09961   | 20 20 7 4   | 9.07565    | 24 21 21 17 | 5.06573    |
| 22 16 11 | 19.00125  | 12 11 3 3   | 7.66071     | 20 20 7 5   | 4.34941    | 24 21 21 18 | 3.31508    |

| I J K    | FI(I,J,K) | I J K L     | FI(I,J,K,L) | I J K L     | FI(I,J,K,L) | I J K L     | FI(I,J,K,L) |
|----------|-----------|-------------|-------------|-------------|-------------|-------------|-------------|
| 22 16 12 | -23.10094 | 12 11 4 4   | 3.37934     | 20 20 7 6   | -1.60807    | 24 21 21 19 | -1.73185    |
| 22 16 13 | -15.88270 | 12 11 5 5   | 4.42723     | 20 20 7 7   | 3.07430     | 24 21 21 20 | -2.46709    |
| 22 17 1  | -39.08639 | 12 11 6 6   | -7.09114    | 20 20 8 1   | 6.10911     | 24 21 21 21 | -18.96955   |
| 22 17 2  | 2.88324   | 12 11 7 7   | 3.98845     | 20 20 8 2   | 3.01697     | 24 22 1 1   | -18.49104   |
| 22 17 3  | 5.58984   | 12 11 8 8   | 4.12811     | 20 20 8 3   | -1.72107    | 24 22 2 2   | -25.64871   |
| 22 17 4  | -19.76500 | 12 11 9 9   | -2.54674    | 20 20 8 4   | -8.95905    | 24 22 3 3   | -27.47744   |
| 22 17 5  | -8.77755  | 12 11 10 10 | 45.18847    | 20 20 8 5   | -3.69214    | 24 22 4 4   | 8.84153     |
| 22 17 6  | -46.56383 | 12 11 11 10 | -0.74871    | 20 20 8 6   | 1.24202     | 24 22 5 5   | 1.31949     |
| 22 17 7  | 8.88510   | 12 11 11 11 | -41.11747   | 20 20 8 7   | -1.87054    | 24 22 6 6   | 14.56443    |
| 22 17 8  | 65.82149  | 12 12 1 1   | -143.60338  | 20 20 8 8   | 3.32947     | 24 22 7 7   | 7.39778     |
| 22 17 9  | -71.48974 | 12 12 2 1   | 13.95101    | 20 20 9 1   | -4.46349    | 24 22 8 8   | 5.77262     |
| 22 18 2  | -15.67840 | 12 12 2 2   | -80.35129   | 20 20 9 2   | 3.48049     | 24 22 9 9   | 19.72833    |
| 22 18 3  | -17.41079 | 12 12 3 1   | -39.78809   | 20 20 9 3   | 1.29842     | 24 22 10 10 | 1.92176     |
| 22 18 4  | -23.56371 | 12 12 3 2   | 14.29364    | 20 20 9 4   | -4.27345    | 24 22 11 11 | 14.84719    |
| 22 18 5  | 11.26362  | 12 12 3 3   | -109.78237  | 20 20 9 5   | -4.72445    | 24 22 12 12 | 8.90434     |
| 22 18 6  | -19.94168 | 12 12 4 1   | 8.25856     | 20 20 9 6   | 3.97941     | 24 22 13 13 | 6.69724     |
| 22 18 7  | 66.83591  | 12 12 4 2   | -14.40734   | 20 20 9 8   | -1.11418    | 24 22 14 14 | 3.16574     |
| 22 18 8  | 8.43859   | 12 12 4 3   | 15.42910    | 20 20 9 9   | 0.24168     | 24 22 15 15 | 13.82488    |
| 22 18 9  | -12.06535 | 12 12 4 4   | -7.17652    | 20 20 10 10 | -6.51218    | 24 22 16 16 | -0.46782    |
| 22 19 1  | 4.43128   | 12 12 5 1   | 0.45741     | 20 20 11 10 | 4.30965     | 24 22 17 17 | -17.05900   |
| 22 19 2  | -19.05865 | 12 12 5 2   | -6.68872    | 20 20 11 11 | -3.00554    | 24 22 18 18 | -26.66555   |
| 22 19 3  | -0.51552  | 12 12 5 3   | 5.62107     | 20 20 12 10 | -3.85113    | 24 22 19 19 | -27.16267   |
| 22 19 4  | -10.34479 | 12 12 5 4   | -1.33021    | 20 20 12 11 | 2.24516     | 24 22 20 20 | 10.27812    |
| 22 19 5  | 30.49788  | 12 12 5 5   | 2.54664     | 20 20 12 12 | -6.65376    | 24 22 21 21 | 2.45680     |
| 22 19 6  | 52.96495  | 12 12 6 1   | -2.18433    | 20 20 13 10 | 19.77393    | 24 22 22 17 | 3.89987     |
| 22 19 7  | 8.88086   | 12 12 6 2   | -3.88272    | 20 20 13 11 | -12.28899   | 24 22 22 18 | 1.49752     |
| 22 19 8  | -36.35010 | 12 12 6 3   | 8.34507     | 20 20 13 12 | 13.36200    | 24 22 22 19 | 2.86883     |
| 22 19 9  | 58.01188  | 12 12 6 4   | 1.87945     | 20 20 13 13 | -63.34326   | 24 22 22 20 | 3.89244     |
| 22 20 1  | -24.89291 | 12 12 6 5   | 5.29839     | 20 20 14 14 | -12.12745   | 24 22 22 21 | 4.01493     |
| 22 20 2  | -22.56950 | 12 12 6 6   | 2.17856     | 20 20 15 14 | -3.11460    | 24 22 22 22 | 15.35244    |
| 22 20 3  | -2.84000  | 12 12 7 2   | 2.93396     | 20 20 15 15 | -1.15470    | 24 23 1 1   | -62.86810   |
| 22 20 4  | -67.47742 | 12 12 7 3   | -1.10484    | 20 20 16 14 | 5.00256     | 24 23 2 2   | 16.05290    |
| 22 20 5  | -1.90711  | 12 12 7 4   | -1.62749    | 20 20 16 15 | 0.58062     | 24 23 3 3   | -36.47671   |
| 22 20 6  | 2.23682   | 12 12 7 5   | 3.85104     | 20 20 16 16 | -3.34521    | 24 23 4 4   | 6.34399     |
| 22 20 7  | -14.67476 | 12 12 7 6   | -0.80661    | 20 20 17 17 | -7.05287    | 24 23 5 5   | 6.30145     |
| 22 20 8  | 16.99051  | 12 12 7 7   | 9.29724     | 20 20 18 17 | -2.38476    | 24 23 6 6   | 19.30803    |
| 22 20 9  | 6.50418   | 12 12 8 1   | -2.89641    | 20 20 18 18 | -0.05868    | 24 23 7 7   | -10.27243   |
| 22 21 1  | -13.68821 | 12 12 8 2   | 1.09639     | 20 20 19 17 | 1.74371     | 24 23 8 8   | 30.55116    |
| 22 21 2  | 15.93058  | 12 12 8 4   | 4.86286     | 20 20 19 18 | -4.97088    | 24 23 9 9   | 25.27025    |
| 22 21 3  | 49.30402  | 12 12 8 5   | 7.67094     | 20 20 19 19 | -1.50479    | 24 23 11 11 | 15.23175    |
| 22 21 4  | 10.70508  | 12 12 8 6   | 1.44048     | 20 20 20 17 | 2.34789     | 24 23 12 12 | 23.08493    |
| 22 21 5  | 5.69597   | 12 12 8 7   | -1.07402    | 20 20 20 18 | -19.35890   | 24 23 14 14 | -1.22154    |
| 22 21 6  | 23.40583  | 12 12 8 8   | 23.67712    | 20 20 20 19 | 10.56903    | 24 23 15 15 | 14.07593    |
| 22 21 7  | -8.78065  | 12 12 9 1   | -2.06902    | 20 20 20 20 | 49.88229    | 24 23 16 16 | 16.86129    |
| 22 21 8  | 7.31584   | 12 12 9 2   | 1.44112     | 21 17 1 1   | 8.47966     | 24 23 17 17 | -62.26338   |
| 22 21 9  | -6.64141  | 12 12 9 3   | -0.55428    | 21 17 2 2   | -0.78225    | 24 23 18 18 | 14.40868    |
| 22 22 1  | -43.70032 | 12 12 9 4   | -4.02076    | 21 17 3 3   | -2.35673    | 24 23 19 19 | -36.17551   |
| 22 22 2  | -52.09781 | 12 12 9 5   | -9.39370    | 21 17 4 4   | 2.55099     | 24 23 20 20 | 9.72827     |
| 22 22 3  | 29.35448  | 12 12 9 6   | 2.75436     | 21 17 5 5   | 0.66110     | 24 23 21 21 | 12.39922    |
| 22 22 4  | 6.02891   | 12 12 9 7   | 7.09334     | 21 17 7 7   | 0.55050     | 24 23 22 22 | 11.70419    |
| 22 22 5  | 25.92503  | 12 12 9 8   | -22.58026   | 21 17 8 8   | -1.53315    | 24 23 23 17 | -0.36062    |
| 22 22 6  | -12.82642 | 12 12 9 9   | 18.22553    | 21 17 9 9   | 1.70597     | 24 23 23 19 | 0.58707     |
| 22 22 7  | 13.87035  | 12 12 10 10 | 92.18401    | 21 17 10 10 | -0.83676    | 24 23 23 20 | 4.37183     |
| 22 22 8  | 13.91882  | 12 12 11 10 | -30.22164   | 21 17 11 11 | 1.11392     | 24 23 23 21 | -18.02986   |
| 22 22 9  | -7.00498  | 12 12 11 11 | 104.41724   | 21 17 12 12 | -3.09293    | 24 23 23 22 | 15.46706    |
| 23 14 10 | 0.87509   | 12 12 12 10 | -52.04200   | 21 17 14 14 | 0.40706     | 24 23 23 23 | 16.35477    |
| 23 14 11 | 5.85455   | 12 12 12 11 | 37.12676    | 21 17 15 15 | 0.62690     | 24 24 1 1   | -83.19063   |
| 23 14 12 | 14.32903  | 12 12 12 12 | 245.18677   | 21 17 16 16 | -3.18466    | 24 24 2 1   | -3.95465    |
| 23 14 13 | 8.13071   | 13 10 1 1   | -20.50586   | 21 17 17 17 | 8.30798     | 24 24 2 2   | -31.74078   |
| 23 15 10 | -5.76073  | 13 10 2 2   | -57.60242   | 21 18 1 1   | 0.42994     | 24 24 3 1   | -1.64247    |
| 23 15 11 | -6.42926  | 13 10 3 3   | -27.03101   | 21 18 2 2   | 0.28100     | 24 24 3 2   | 25.03970    |
| 23 15 12 | -4.62043  | 13 10 4 4   | 20.16317    | 21 18 3 3   | 6.59759     | 24 24 3 3   | -66.01214   |
| 23 15 13 | -1.58343  | 13 10 5 5   | 2.25248     | 21 18 4 4   | 3.68245     | 24 24 4 1   | 1.20332     |
| 23 16 10 | -7.64530  | 13 10 6 6   | 0.53715     | 21 18 5 5   | -1.52392    | 24 24 4 2   | 0.72419     |
| 23 16 11 | 1.61379   | 13 10 7 7   | 6.87777     | 21 18 6 6   | 1.01987     | 24 24 4 3   | 8.24479     |
| 23 16 12 | -7.98378  | 13 10 8 8   | 3.92906     | 21 18 7 7   | 0.97168     | 24 24 4 4   | -26.74273   |
| 23 17 1  | 1.97035   | 13 10 9 9   | 3.09444     | 21 18 8 8   | -3.08507    | 24 24 5 1   | -2.35555    |
| 23 17 2  | 7.85768   | 13 10 10 10 | 43.24413    | 21 18 9 9   | -0.75147    | 24 24 5 2   | -4.59045    |
| 23 17 3  | -7.28802  | 13 11 1 1   | 56.05714    | 21 18 10 10 | 0.26382     | 24 24 5 3   | 3.43190     |
| 23 17 4  | -46.17332 | 13 11 2 2   | -14.37212   | 21 18 11 11 | 1.24772     | 24 24 5 4   | -3.43106    |
| 23 17 5  | -57.31469 | 13 11 3 3   | 38.66118    | 21 18 12 12 | -2.93045    | 24 24 5 5   | 13.54009    |
| 23 17 6  | -88.26093 | 13 11 4 4   | -8.46334    | 21 18 13 13 | -3.27274    | 24 24 6 1   | 2.84676     |
| 23 17 7  | 41.48306  | 13 11 5 5   | 0.71867     | 21 18 14 14 | -0.38144    | 24 24 6 2   | -3.33240    |
| 23 17 8  | -37.99312 | 13 11 6 6   | -6.43085    | 21 18 15 15 | 1.09448     | 24 24 6 3   | 5.83456     |
| 23 17 9  | 17.33803  | 13 11 7 7   | 0.86323     | 21 18 16 16 | -1.56078    | 24 24 6 4   | 12.97483    |
| 23 18 1  | 7.91846   | 13 11 8 8   | -6.49915    | 21 18 17 17 | 0.50095     | 24 24 6 5   | 14.40818    |
| 23 18 2  | 1.17269   | 13 11 9 9   | -9.53775    | 21 18 18 17 | -0.63108    | 24 24 6 6   | 30.30333    |
| 23 18 3  | -2.30118  | 13 11 10 10 | 13.02315    | 21 19 1 1   | 3.81510     | 24 24 7 1   | -1.29278    |
| 23 18 4  | 33.03805  | 13 11 11 10 | 24.52388    | 21 19 2 2   | -2.19938    | 24 24 7 2   | 0.74295     |
| 23 18 5  | -49.38977 | 13 11 11 11 | -71.15824   | 21 19 3 3   | -7.70333    | 24 24 7 3   | -2.78883    |
| 23 18 6  | -43.37562 | 13 12 1 1   | -11.91661   | 21 19 4 4   | 4.18202     | 24 24 7 4   | -11.35098   |
| 23 18 7  | -91.72910 | 13 12 2 2   | -54.95333   | 21 19 6 6   | -2.85247    | 24 24 7 5   | -3.78965    |
| 23 18 8  | 69.99745  | 13 12 3 3   | -34.88465   | 21 19 7 7   | -1.16859    | 24 24 7 6   | -6.40418    |
| 23 18 9  | -96.59721 | 13 12 4 4   | 14.44617    | 21 19 8 8   | 3.43888     | 24 24 7 7   | 12.52887    |
| 23 19 1  | -8.10708  | 13 12 5 5   | -2.30480    | 21 19 9 9   | 3.79554     | 24 24 8 1   | -3.31204    |
| 23 19 2  | -2.09039  | 13 12 6 6   | 3.33583     | 21 19 10 10 | 0.60362     | 24 24 8 2   | -1.34173    |
| 23 19 3  | 3.71012   | 13 12 7 7   | 6.54563     | 21 19 11 11 | -3.13302    | 24 24 8 3   | 0.88446     |
| 23 19 4  | 26.81928  | 13 12 8 8   | 4.49990     | 21 19 12 12 | 5.91750     | 24 24 8 4   | 6.84485     |
| 23 19 5  | -43.45169 | 13 12 9 9   | 6.02931     | 21 19 13 13 | -3.88542    | 24 24 8 5   | 14.61775    |
| 23 19 6  | 12.36331  | 13 12 10 10 | 17.98421    | 21 19 14 14 | -0.14267    | 24 24 8 6   | -5.77380    |







| I J K   | Fl(I,J,K)  | I J K L | Fl(I,J,,K,L) | I J K L     | Fl(I,J,K,L) | I J K L     | Fl(I,J,K,L) |
|---------|------------|---------|--------------|-------------|-------------|-------------|-------------|
| 7 4 3   | -22.97765  | 4 4 4 2 | -3.07191     | 14 12 7 7   | -1.39658    | 19 19 8 1   | -2.50803    |
| 7 4 4   | -33.80262  | 4 4 4 3 | -10.07253    | 14 12 8 8   | -1.06192    | 19 19 8 2   | -1.30135    |
| 7 5 1   | -13.08980  | 4 4 4 4 | 27.16072     | 14 12 9 9   | -53.51629   | 19 19 8 3   | -4.11194    |
| 7 5 2   | -94.70428  | 5 1 1 1 | 0.82582      | 14 12 10 10 | -75.45076   | 19 19 8 4   | 7.20814     |
| 7 5 3   | -5.29138   | 5 2 1 1 | 0.64175      | 14 12 11 11 | -10.15706   | 19 19 8 5   | -15.49537   |
| 7 5 4   | 27.50361   | 5 2 2 1 | 1.41960      | 14 12 12 12 | -67.26106   | 19 19 8 6   | -3.55699    |
| 7 5 5   | -6.15209   | 5 2 2 2 | -6.18296     | 14 13 1 1   | -53.89470   | 19 19 8 7   | -0.96246    |
| 7 6 1   | -33.53173  | 5 3 1 1 | -2.91279     | 14 13 2 2   | 37.37124    | 19 19 8 8   | 2.74985     |
| 7 6 2   | 44.93439   | 5 3 2 2 | -96.77573    | 14 13 3 3   | -3.88257    | 19 19 9 9   | 19.79220    |
| 7 6 3   | -14.22444  | 5 3 3 1 | 0.25422      | 14 13 4 4   | 5.52118     | 19 19 10 9  | -9.29411    |
| 7 6 4   | -6.29845   | 5 3 3 2 | -1.81806     | 14 13 5 5   | 1.07015     | 19 19 10 10 | 57.42048    |
| 7 6 5   | -17.81080  | 5 3 3 3 | 2.89081      | 14 13 6 6   | 0.99597     | 19 19 11 9  | 6.80872     |
| 7 6 6   | -31.14219  | 5 4 1 1 | 114.09146    | 14 13 7 7   | 1.29054     | 19 19 11 10 | 12.43335    |
| 7 7 1   | 21.39547   | 5 4 2 2 | -38.94125    | 14 13 9 9   | -29.39559   | 19 19 11 11 | -1.10475    |
| 7 7 2   | -38.72100  | 5 4 3 3 | 16.11638     | 14 13 10 10 | 76.11058    | 19 19 12 12 | 29.62272    |
| 7 7 3   | 1.67583    | 5 4 4 1 | 3.83145      | 14 13 11 11 | -4.96902    | 19 19 13 12 | -13.01944   |
| 7 7 4   | 38.31749   | 5 4 4 2 | 0.75460      | 14 13 12 12 | 10.38177    | 19 19 13 13 | 48.67400    |
| 7 7 5   | 17.51355   | 5 4 4 3 | -4.84985     | 14 13 13 12 | -66.18643   | 19 19 14 12 | -9.06814    |
| 7 7 6   | -14.77613  | 5 4 4 4 | -22.86630    | 14 13 13 13 | 16.84389    | 19 19 14 13 | 2.24180     |
| 7 7 7   | -140.29738 | 5 5 1 1 | -130.07948   | 14 14 1 1   | -17.04979   | 19 19 14 14 | -4.43502    |
| 8 1 1   | -7.08969   | 5 5 2 1 | -3.06435     | 14 14 2 1   | -3.29729    | 19 19 15 15 | -152.50523  |
| 8 2 1   | -1.39301   | 5 5 2 2 | -122.44977   | 14 14 2 2   | -7.98067    | 19 19 16 15 | -14.10836   |
| 8 2 2   | -3.31222   | 5 5 3 1 | 1.11248      | 14 14 3 1   | -0.85056    | 19 19 16 16 | -77.16789   |
| 8 3 1   | -9.33998   | 5 5 3 2 | -1.63366     | 14 14 3 2   | 2.32704     | 19 19 17 15 | 3.78458     |
| 8 3 2   | 31.20384   | 5 5 3 3 | 24.69892     | 14 14 3 3   | -15.70558   | 19 19 17 16 | -0.25479    |
| 8 3 3   | -0.57054   | 5 5 4 1 | -1.85147     | 14 14 4 1   | 0.17992     | 19 19 17 17 | 19.60309    |
| 8 4 1   | 28.72716   | 5 5 4 2 | 0.61217      | 14 14 4 2   | -0.31062    | 19 19 18 15 | 2.29301     |
| 8 4 2   | 25.03238   | 5 5 4 3 | 6.06732      | 14 14 4 3   | 10.37461    | 19 19 18 16 | 0.25578     |
| 8 4 3   | 0.61047    | 5 5 4 4 | 36.13282     | 14 14 4 4   | -11.43404   | 19 19 18 17 | 2.88784     |
| 8 4 4   | -3.24199   | 5 5 5 1 | -3.42159     | 14 14 5 1   | 0.96195     | 19 19 18 18 | 55.13677    |
| 8 5 1   | -46.65769  | 5 5 5 2 | 0.64457      | 14 14 5 2   | 0.33864     | 19 19 19 15 | -1.16468    |
| 8 5 2   | 28.95672   | 5 5 5 3 | 27.12954     | 14 14 5 3   | 5.70827     | 19 19 19 16 | 1.65592     |
| 8 5 3   | -5.58641   | 5 5 5 4 | -20.92653    | 14 14 5 4   | -4.62987    | 19 19 19 17 | 23.28232    |
| 8 5 4   | -9.47915   | 5 5 5 5 | 85.10336     | 14 14 5 5   | -3.33109    | 19 19 19 18 | 26.92372    |
| 8 5 5   | 4.63920    | 6 1 1 1 | 6.98322      | 14 14 6 1   | 0.64350     | 19 19 19 19 | 73.51066    |
| 8 6 1   | -19.06857  | 6 2 1 1 | 1.57957      | 14 14 6 3   | 3.63980     | 20 15 1 1   | 1.95266     |
| 8 6 2   | -29.59771  | 6 2 2 1 | 3.38025      | 14 14 6 4   | -1.91454    | 20 15 2 2   | 0.51230     |
| 8 6 3   | 3.90015    | 6 2 2 2 | -8.42311     | 14 14 6 5   | -1.49444    | 20 15 3 3   | 1.61252     |
| 8 6 4   | 3.13877    | 6 3 1 1 | 5.76832      | 14 14 6 6   | -0.52720    | 20 15 4 4   | -1.27697    |
| 8 6 5   | 7.48120    | 6 3 2 2 | 63.22302     | 14 14 7 1   | -0.21693    | 20 15 5 5   | 3.50376     |
| 8 6 6   | 8.20514    | 6 3 3 1 | -2.33362     | 14 14 7 2   | 0.21668     | 20 15 6 6   | 1.54510     |
| 8 7 1   | 10.13009   | 6 3 3 2 | 7.05076      | 14 14 7 3   | -2.04696    | 20 15 7 7   | 0.49469     |
| 8 7 2   | 21.99979   | 6 3 3 3 | 11.19339     | 14 14 7 4   | 2.88234     | 20 15 8 8   | -1.59088    |
| 8 7 3   | 8.45915    | 6 4 1 1 | 77.70607     | 14 14 7 5   | 0.79463     | 20 15 9 9   | -0.67378    |
| 8 7 4   | 16.19196   | 6 4 2 2 | 35.12112     | 14 14 7 6   | -0.88936    | 20 15 10 10 | 5.47817     |
| 8 7 5   | -9.61164   | 6 4 3 3 | 12.13855     | 14 14 7 7   | -4.74345    | 20 15 12 12 | 2.16711     |
| 8 7 6   | -4.54236   | 6 4 4 1 | 1.24003      | 14 14 8 1   | 0.29517     | 20 15 13 13 | 2.55615     |
| 8 7 7   | -39.68063  | 6 4 4 2 | 0.30436      | 14 14 8 2   | 0.20851     | 20 15 14 14 | -0.91176    |
| 8 8 1   | 14.41840   | 6 4 4 3 | -1.27611     | 14 14 8 4   | 1.69377     | 20 15 15 15 | 1.90252     |
| 8 8 2   | -5.87605   | 6 4 4 4 | -17.76752    | 14 14 8 5   | -0.45308    | 20 16 1 1   | -0.12102    |
| 8 8 3   | 5.93408    | 6 5 1 1 | -73.58666    | 14 14 8 7   | -2.81931    | 20 16 2 2   | -3.98445    |
| 8 8 4   | 13.27768   | 6 5 2 2 | 69.05188     | 14 14 8 8   | -1.96459    | 20 16 3 3   | 2.87569     |
| 8 8 5   | -16.35661  | 6 5 3 3 | -15.71829    | 14 14 9 9   | 1.54609     | 20 16 4 4   | 2.60087     |
| 8 8 6   | -16.44036  | 6 5 4 4 | 18.38067     | 14 14 10 9  | 4.01170     | 20 16 5 5   | 4.93938     |
| 8 8 7   | -28.99522  | 6 5 5 1 | -3.42573     | 14 14 10 10 | 6.78664     | 20 16 6 6   | 3.71175     |
| 8 8 8   | -41.08070  | 6 5 5 2 | 0.53698      | 14 14 11 9  | 3.83472     | 20 16 7 7   | 0.76803     |
| 9 9 1   | 189.48932  | 6 5 5 3 | -19.55951    | 14 14 11 10 | -0.67790    | 20 16 8 8   | -0.23454    |
| 9 9 2   | -472.06505 | 6 5 5 4 | -28.70247    | 14 14 11 11 | 5.31153     | 20 16 9 9   | 7.08352     |
| 9 9 3   | 4.77632    | 6 5 5 5 | 0.54879      | 14 14 12 12 | -3.24126    | 20 16 10 10 | 2.42714     |
| 9 9 4   | 1.10203    | 6 6 1 1 | -53.33810    | 14 14 13 12 | 4.77212     | 20 16 11 11 | -0.98417    |
| 9 9 6   | -22.57158  | 6 6 2 1 | -1.00191     | 14 14 13 13 | 9.93920     | 20 16 12 12 | 4.78574     |
| 9 9 7   | 7.81357    | 6 6 2 2 | -51.21732    | 14 14 14 12 | -3.54985    | 20 16 13 13 | 4.88332     |
| 9 9 8   | -6.58209   | 6 6 3 2 | 3.24604      | 14 14 14 13 | 2.12987     | 20 16 14 14 | -0.83277    |
| 10 9 1  | -189.39673 | 6 6 3 3 | 43.58898     | 14 14 14 14 | 4.26801     | 20 16 15 15 | -0.04676    |
| 10 9 2  | -239.39166 | 6 6 4 1 | 0.39840      | 15 15 1 1   | 500.71741   | 20 16 16 15 | 0.45902     |
| 10 9 3  | -23.59293  | 6 6 4 2 | 2.20708      | 15 15 2 1   | 123.19193   | 20 16 16 16 | -3.88136    |
| 10 9 4  | 19.38008   | 6 6 4 3 | 16.01133     | 15 15 2 2   | 46.50793    | 20 17 1 1   | 19.51404    |
| 10 9 5  | 21.45111   | 6 6 4 4 | 17.64790     | 15 15 3 1   | -10.70510   | 20 17 2 2   | -5.72314    |
| 10 9 6  | -17.56685  | 6 6 5 1 | -1.88356     | 15 15 3 2   | -2.63030    | 20 17 3 3   | 2.56005     |
| 10 9 7  | 8.76211    | 6 6 5 2 | -2.77719     | 15 15 3 3   | -3.35044    | 20 17 4 4   | -15.09709   |
| 10 9 8  | -9.27479   | 6 6 5 3 | 8.93576      | 15 15 4 1   | 13.05949    | 20 17 5 5   | -6.42829    |
| 10 10 1 | 783.90657  | 6 6 5 4 | -10.37080    | 15 15 4 2   | 2.11481     | 20 17 6 6   | -6.12986    |
| 10 10 2 | 131.47137  | 6 6 5 5 | 32.70210     | 15 15 4 3   | -4.72171    | 20 17 7 7   | 1.74520     |
| 10 10 3 | 44.21650   | 6 6 6 1 | -3.61050     | 15 15 4 4   | -117.85665  | 20 17 8 8   | 0.39555     |
| 10 10 4 | -25.34447  | 6 6 6 2 | 4.95902      | 15 15 5 1   | 0.65235     | 20 17 9 9   | -1.37901    |
| 10 10 5 | 26.78325   | 6 6 6 3 | 24.10117     | 15 15 5 2   | 0.91994     | 20 17 10 10 | -7.54660    |
| 10 10 6 | 24.87631   | 6 6 6 4 | -2.23580     | 15 15 5 3   | 0.13451     | 20 17 11 11 | 1.08260     |
| 10 10 8 | -0.89992   | 6 6 6 5 | -8.10735     | 15 15 5 4   | 119.35552   | 20 17 12 12 | -2.04697    |
| 11 9 1  | 32.89407   | 6 6 6 6 | 49.08198     | 15 15 5 5   | -130.54617  | 20 17 13 13 | -5.37599    |
| 11 9 2  | -249.45233 | 7 1 1 1 | 7.42435      | 15 15 6 1   | 7.10761     | 20 17 14 14 | 1.35792     |
| 11 9 3  | -11.83609  | 7 2 1 1 | 1.33887      | 15 15 6 2   | 1.86350     | 20 17 15 15 | 20.41317    |
| 11 9 4  | -12.45500  | 7 2 2 1 | 1.57740      | 15 15 6 3   | 3.91229     | 20 17 16 16 | -6.22657    |
| 11 9 5  | 3.88604    | 7 2 2 2 | -6.21587     | 15 15 6 4   | 79.33513    | 20 17 17 15 | -1.27588    |
| 11 9 6  | -9.34637   | 7 3 1 1 | -3.26743     | 15 15 6 5   | -78.50008   | 20 17 17 16 | 3.17392     |
| 11 9 7  | -2.73990   | 7 3 2 2 | -47.13227    | 15 15 6 6   | -53.68045   | 20 17 17 17 | -7.41382    |
| 11 9 8  | -1.96038   | 7 3 3 1 | 1.56117      | 15 15 7 1   | 7.39981     | 20 18 1 1   | 57.41415    |
| 11 10 1 | 123.95697  | 7 3 3 2 | 0.77984      | 15 15 7 2   | 1.61968     | 20 18 2 2   | 12.59333    |
| 11 10 2 | -62.42700  | 7 3 3 3 | 24.47437     | 15 15 7 3   | -1.92342    | 20 18 3 3   | -4.33631    |

| I J K    | FI(I,J,K)   | I J K L | FI(I,J,K,L) | I J K L     | FI(I,J,K,L) | I J K L     | FI(I,J,K,L) |
|----------|-------------|---------|-------------|-------------|-------------|-------------|-------------|
| 11 10 3  | 1.44554     | 7 4 1 1 | -26.46241   | 15 15 7 4   | -26.73441   | 20 18 4 4   | -21.21500   |
| 11 10 4  | 11.11735    | 7 4 2 2 | -23.33684   | 15 15 7 5   | 25.20823    | 20 18 5 5   | -20.69429   |
| 11 10 5  | -1.68982    | 7 4 3 3 | 1.41970     | 15 15 7 6   | 18.36174    | 20 18 6 6   | -9.75467    |
| 11 10 6  | -12.04107   | 7 4 4 1 | -0.21010    | 15 15 7 7   | -7.51116    | 20 18 7 7   | 2.74278     |
| 11 10 7  | -5.17762    | 7 4 4 2 | 2.27265     | 15 15 8 1   | 1.34373     | 20 18 8 8   | 0.85474     |
| 11 10 8  | 4.13702     | 7 4 4 3 | 1.77617     | 15 15 8 2   | 0.04701     | 20 18 9 9   | -6.63000    |
| 11 11 1  | 29.69687    | 7 4 4 4 | 12.84342    | 15 15 8 3   | -0.36395    | 20 18 10 10 | -24.96311   |
| 11 11 2  | -98.61558   | 7 5 1 1 | 22.62456    | 15 15 8 4   | -25.21003   | 20 18 12 12 | -13.59618   |
| 11 11 3  | -17.86804   | 7 5 2 2 | -53.24189   | 15 15 8 5   | 27.03220    | 20 18 13 13 | -17.45923   |
| 11 11 4  | 61.76330    | 7 5 3 3 | 8.01539     | 15 15 8 6   | 16.68734    | 20 18 14 14 | -1.35255    |
| 11 11 5  | 5.67257     | 7 5 4 4 | -5.46970    | 15 15 8 7   | -4.74257    | 20 18 15 15 | 58.97379    |
| 11 11 6  | 27.66586    | 7 5 5 1 | 1.76987     | 15 15 8 8   | -5.96167    | 20 18 16 16 | 10.89312    |
| 11 11 7  | -9.03173    | 7 5 5 2 | 3.10593     | 15 15 9 9   | -57.73825   | 20 18 17 17 | -9.14915    |
| 11 11 8  | 1.17736     | 7 5 5 3 | 15.32596    | 15 15 10 9  | 143.98486   | 20 18 18 15 | 0.47888     |
| 12 12 1  | 380.46914   | 7 5 5 4 | 14.41696    | 15 15 10 10 | -476.56193  | 20 18 18 16 | 5.04253     |
| 12 12 2  | -247.49282  | 7 5 5 5 | 10.85869    | 15 15 11 9  | 15.95015    | 20 18 18 17 | -6.86223    |
| 12 12 3  | 30.78437    | 7 6 1 1 | 18.88460    | 15 15 11 10 | -67.57701   | 20 18 18 18 | -21.59202   |
| 12 12 4  | -2.57594    | 7 6 2 2 | 36.87089    | 15 15 11 11 | -15.31345   | 20 19 1 1   | 64.43676    |
| 12 12 5  | -30.90281   | 7 6 3 3 | -2.62134    | 15 15 12 12 | -205.01173  | 20 19 2 2   | -2.77866    |
| 12 12 6  | -1.53431    | 7 6 4 4 | -2.92285    | 15 15 13 12 | 228.16216   | 20 19 3 3   | -1.40356    |
| 12 12 7  | 2.81533     | 7 6 5 5 | -16.81054   | 15 15 13 13 | -293.04399  | 20 19 4 4   | -16.45329   |
| 12 12 8  | 12.18468    | 7 6 6 1 | 0.88856     | 15 15 14 12 | 50.16305    | 20 19 5 5   | -20.36335   |
| 13 12 1  | -282.40920  | 7 6 6 2 | 0.92344     | 15 15 14 13 | -57.45206   | 20 19 6 6   | -5.19093    |
| 13 12 2  | -456.92197  | 7 6 6 3 | 9.88368     | 15 15 14 14 | -17.43158   | 20 19 7 7   | -1.22902    |
| 13 12 3  | -13.60497   | 7 6 6 4 | 8.83725     | 15 15 15 15 | 516.84983   | 20 19 8 8   | -0.30911    |
| 13 12 4  | -1.35275    | 7 6 6 5 | 5.84547     | 16 15 1 1   | 82.62084    | 20 19 10 10 | -27.98694   |
| 13 12 5  | -0.73105    | 7 6 6 6 | -3.21987    | 16 15 2 2   | -81.35444   | 20 19 11 11 | -1.44698    |
| 13 12 6  | 2.04061     | 7 7 1 1 | -8.12049    | 16 15 3 3   | 14.34604    | 20 19 12 12 | -9.02497    |
| 13 12 7  | 9.59411     | 7 7 2 2 | 5.05533     | 16 15 4 4   | -17.66745   | 20 19 13 13 | -16.40435   |
| 13 12 8  | -9.06546    | 7 7 2 2 | -27.01450   | 16 15 5 5   | -2.17211    | 20 19 14 14 | -0.81903    |
| 13 13 1  | 558.38378   | 7 7 3 1 | -0.58423    | 16 15 6 6   | -0.37910    | 20 19 15 15 | 66.68115    |
| 13 13 2  | -285.40218  | 7 7 3 2 | 1.80410     | 16 15 7 7   | 3.74131     | 20 19 16 16 | -5.03283    |
| 13 13 3  | -6.40192    | 7 7 3 3 | 4.18916     | 16 15 8 8   | -0.08381    | 20 19 17 17 | -2.10320    |
| 13 13 4  | 11.63752    | 7 7 4 1 | 2.40501     | 16 15 9 9   | 47.87897    | 20 19 18 18 | -15.07156   |
| 13 13 5  | 7.39335     | 7 7 4 2 | 1.61016     | 16 15 10 10 | -76.28434   | 20 19 19 15 | 4.78058     |
| 13 13 6  | 14.22184    | 7 7 4 3 | 6.67236     | 16 15 11 11 | 8.88323     | 20 19 19 16 | 3.32004     |
| 13 13 7  | -9.80612    | 7 7 4 4 | 2.41138     | 16 15 12 12 | 0.84940     | 20 19 19 17 | -6.33105    |
| 13 13 8  | 5.44493     | 7 7 5 1 | -2.02181    | 16 15 13 13 | -6.93509    | 20 19 19 18 | -22.11671   |
| 14 12 1  | -103.27766  | 7 7 5 2 | 1.10371     | 16 15 14 14 | -2.37464    | 20 19 19 19 | -23.62850   |
| 14 12 2  | 46.36101    | 7 7 5 3 | 9.23005     | 16 15 15 15 | 88.26785    | 20 20 1 1   | -32.95716   |
| 14 12 3  | -16.71337   | 7 7 5 4 | -1.04567    | 16 16 1 1   | 46.29797    | 20 20 2 1   | -8.30507    |
| 14 12 4  | -3.33973    | 7 7 5 5 | 10.43495    | 16 16 2 1   | -122.13954  | 20 20 2 2   | -3.56847    |
| 14 12 5  | -4.05530    | 7 7 6 1 | -0.70501    | 16 16 2 2   | 504.68649   | 20 20 3 1   | -1.03797    |
| 14 12 6  | 9.00478     | 7 7 6 2 | -0.87092    | 16 16 3 1   | -0.60043    | 20 20 3 3   | -13.97729   |
| 14 12 7  | -0.90910    | 7 7 6 3 | -2.24828    | 16 16 3 2   | -0.94943    | 20 20 4 1   | 3.61844     |
| 14 12 8  | 3.33983     | 7 7 6 4 | -5.48065    | 16 16 3 3   | -86.37409   | 20 20 4 2   | 0.33667     |
| 14 13 1  | 81.07768    | 7 7 6 5 | -5.64080    | 16 16 4 1   | 3.58746     | 20 20 4 3   | 4.86681     |
| 14 13 2  | 95.82606    | 7 7 6 6 | 6.22459     | 16 16 4 2   | -15.04122   | 20 20 4 4   | 5.57480     |
| 14 13 3  | -35.66755   | 7 7 7 1 | -0.19037    | 16 16 4 3   | -40.56712   | 20 20 5 1   | -3.06744    |
| 14 13 4  | -4.24420    | 7 7 7 2 | 0.91070     | 16 16 4 4   | -23.70406   | 20 20 5 2   | -0.44077    |
| 14 13 5  | -10.72350   | 7 7 7 3 | 0.95016     | 16 16 5 1   | 0.70388     | 20 20 5 3   | 2.11292     |
| 14 13 6  | 2.55375     | 7 7 7 4 | -3.51671    | 16 16 5 2   | -3.89201    | 20 20 5 4   | -11.01268   |
| 14 13 7  | -7.90466    | 7 7 7 5 | 5.16842     | 16 16 5 3   | -100.10052  | 20 20 5 5   | 8.32274     |
| 14 13 8  | -7.98498    | 7 7 7 6 | -0.51122    | 16 16 5 4   | -44.33103   | 20 20 6 1   | -1.48089    |
| 14 14 1  | 13.82585    | 7 7 7 7 | 24.59530    | 16 16 5 5   | -122.59833  | 20 20 6 2   | -1.65110    |
| 14 14 2  | -4.49348    | 8 1 1 1 | 1.19834     | 16 16 6 1   | 3.41778     | 20 20 6 3   | -0.85607    |
| 14 14 3  | -50.24897   | 8 2 2 1 | 0.33397     | 16 16 6 2   | -10.47504   | 20 20 6 4   | -6.75758    |
| 14 14 4  | 33.78497    | 8 2 2 2 | -1.04216    | 16 16 6 3   | 64.11814    | 20 20 6 5   | 5.70577     |
| 14 14 5  | 22.19506    | 8 3 1 1 | 0.21034     | 16 16 6 4   | 33.38075    | 20 20 6 6   | 3.68035     |
| 14 14 6  | 13.20333    | 8 3 2 2 | 19.39679    | 16 16 6 5   | 74.36682    | 20 20 7 1   | 1.39477     |
| 14 14 7  | 1.39971     | 8 3 3 1 | -0.91341    | 16 16 6 6   | -52.35361   | 20 20 7 3   | -0.98803    |
| 14 14 8  | 2.36353     | 8 3 3 2 | -0.09973    | 16 16 7 1   | 1.15611     | 20 20 7 4   | -1.34131    |
| 15 12 9  | 219.24041   | 8 3 3 3 | -7.99078    | 16 16 7 2   | -5.19417    | 20 20 7 5   | -2.31404    |
| 15 12 10 | -465.62469  | 8 4 1 1 | -24.20049   | 16 16 7 3   | -49.00338   | 20 20 7 6   | -2.55359    |
| 15 12 11 | -30.27212   | 8 4 2 2 | 7.39062     | 16 16 7 4   | -23.36953   | 20 20 7 7   | 7.87247     |
| 15 13 9  | -104.12987  | 8 4 3 3 | -1.73870    | 16 16 7 5   | -56.21849   | 20 20 8 1   | -0.55311    |
| 15 13 10 | 636.98602   | 8 4 4 1 | -1.51562    | 16 16 7 6   | 37.51239    | 20 20 8 2   | 0.10877     |
| 15 13 11 | 122.63758   | 8 4 4 2 | -1.12437    | 16 16 7 7   | -27.93882   | 20 20 8 4   | -0.40031    |
| 15 14 9  | -58.68415   | 8 4 4 3 | -0.25929    | 16 16 8 1   | 0.47278     | 20 20 8 5   | -1.07444    |
| 15 14 10 | 127.81735   | 8 4 4 4 | 6.04990     | 16 16 8 2   | -1.62427    | 20 20 8 6   | 0.35689     |
| 15 14 11 | 22.99544    | 8 5 1 1 | 26.95329    | 16 16 8 3   | 20.24838    | 20 20 8 7   | 5.68711     |
| 15 15 1  | -1315.14846 | 8 5 2 2 | 24.47774    | 16 16 8 4   | 8.56807     | 20 20 8 8   | 4.62324     |
| 15 15 2  | -292.49803  | 8 5 3 3 | -5.60618    | 16 16 8 5   | 24.59240    | 20 20 9 9   | -3.19511    |
| 15 15 3  | 26.08040    | 8 5 4 4 | -8.30215    | 16 16 8 6   | -14.78980   | 20 20 10 9  | -1.39664    |
| 15 15 4  | -31.39392   | 8 5 5 1 | -1.19044    | 16 16 8 7   | 11.61600    | 20 20 10 10 | 3.22401     |
| 15 15 5  | -8.09760    | 8 5 5 2 | -1.10827    | 16 16 8 8   | -5.37078    | 20 20 11 9  | -1.92031    |
| 15 15 6  | -22.64662   | 8 5 5 3 | -6.67303    | 16 16 9 9   | -329.64141  | 20 20 11 11 | -0.85115    |
| 15 15 7  | -15.43940   | 8 5 5 4 | 4.89006     | 16 16 10 9  | -111.05656  | 20 20 12 12 | -1.54973    |
| 15 15 8  | -7.61191    | 8 5 5 5 | -17.89846   | 16 16 10 10 | -56.88785   | 20 20 13 12 | -4.87755    |
| 16 12 9  | -380.28979  | 8 6 1 1 | 15.67286    | 16 16 11 9  | -148.70365  | 20 20 13 13 | 2.47987     |
| 16 12 10 | -235.92128  | 8 6 2 2 | -13.64402   | 16 16 11 10 | -54.30196   | 20 20 14 12 | -1.21331    |
| 16 12 11 | -208.72600  | 8 6 3 3 | 3.08436     | 16 16 11 11 | -66.33804   | 20 20 14 13 | 1.70248     |
| 16 13 9  | -487.27501  | 8 6 4 4 | -5.04223    | 16 16 12 12 | -218.50287  | 20 20 14 14 | -2.08352    |
| 16 13 10 | -60.05535   | 8 6 5 5 | 0.13486     | 16 16 13 12 | -221.36311  | 20 20 15 15 | -33.84678   |
| 16 13 11 | -197.95556  | 8 6 6 1 | -0.37514    | 16 16 13 13 | -256.44483  | 20 20 16 15 | -5.80807    |
| 16 14 9  | 78.13763    | 8 6 6 2 | 0.33751     | 16 16 14 12 | 41.53057    | 20 20 16 16 | -2.06628    |
| 16 14 10 | 53.90201    | 8 6 6 3 | -2.70918    | 16 16 14 13 | 40.81964    | 20 20 17 15 | -1.77062    |
| 16 14 11 | 37.40848    | 8 6 6 4 | 1.26892     | 16 16 14 14 | -7.90518    | 20 20 17 16 | 1.08379     |

| I J K    | FI(I,J,K)  | I J K L  | FI(I,J,K,L) | I J K L     | FI(I,J,K,L) | I J K L     | FI(I,J,K,L) |
|----------|------------|----------|-------------|-------------|-------------|-------------|-------------|
| 16 15 1  | -173.48513 | 8 6 6 5  | -7.30539    | 16 16 15 15 | 30.91569    | 20 20 17 17 | -10.20131   |
| 16 15 2  | -284.14199 | 8 7 1 1  | -4.27492    | 16 16 16 15 | -87.47518   | 20 20 18 15 | -3.40792    |
| 16 15 3  | 0.30937    | 8 7 2 2  | 10.90620    | 16 16 16 16 | 523.74555   | 20 20 18 16 | -1.20783    |
| 16 15 4  | 3.04173    | 8 7 3 3  | -1.71264    | 17 15 1 1   | -19.23827   | 20 20 18 17 | 1.73981     |
| 16 15 5  | 0.40371    | 8 7 4 4  | 3.32460     | 17 15 2 2   | -3.53799    | 20 20 18 18 | 8.02176     |
| 16 15 6  | 1.19269    | 8 7 5 5  | -3.20719    | 17 15 3 3   | 2.36535     | 20 20 19 15 | -3.18549    |
| 16 15 7  | -0.51406   | 8 7 6 6  | -1.54089    | 17 15 4 4   | 7.50381     | 20 20 19 16 | -0.36343    |
| 16 15 8  | -1.12879   | 8 7 7 1  | -1.32368    | 17 15 5 5   | 3.23856     | 20 20 19 17 | 7.55039     |
| 16 16 1  | -367.54546 | 8 7 7 2  | -0.71387    | 17 15 6 6   | 0.53764     | 20 20 19 18 | 9.94015     |
| 16 16 2  | 1300.36184 | 8 7 7 3  | -2.17305    | 17 15 7 7   | -1.50836    | 20 20 19 19 | 9.24353     |
| 16 16 3  | 1.65634    | 8 7 7 4  | -5.24332    | 17 15 8 8   | 0.31817     | 20 20 20 15 | 3.43063     |
| 16 16 4  | -36.04948  | 8 7 7 5  | -1.34053    | 17 15 9 9   | 0.21813     | 20 20 20 17 | 2.18270     |
| 16 16 5  | -8.87307   | 8 7 7 6  | 3.13356     | 17 15 10 10 | 14.54512    | 20 20 20 18 | -1.73730    |
| 16 16 6  | -25.98638  | 8 7 7 7  | 9.41675     | 17 15 11 11 | -1.28918    | 20 20 20 19 | -4.92504    |
| 16 16 7  | -15.92143  | 8 8 1 1  | -5.82448    | 17 15 12 12 | 4.19937     | 20 20 20 20 | 2.00391     |
| 16 16 8  | -3.14214   | 8 8 2 1  | -0.11949    | 17 15 13 13 | 10.22383    | 21 15 1 1   | -1.10530    |
| 17 12 9  | 21.33796   | 8 8 2 2  | -5.27261    | 17 15 14 14 | -1.09633    | 21 15 2 2   | -0.25809    |
| 17 12 10 | 10.44904   | 8 8 3 1  | -0.22017    | 17 15 15 15 | -19.64637   | 21 15 3 3   | -0.17292    |
| 17 12 11 | 12.99785   | 8 8 3 2  | 0.38049     | 17 16 1 1   | -2.32453    | 21 15 4 4   | -1.56302    |
| 17 13 9  | 10.39740   | 8 8 3 3  | 0.96654     | 17 16 2 2   | 10.35494    | 21 15 5 5   | -0.22318    |
| 17 13 10 | -7.24498   | 8 8 4 1  | -1.28661    | 17 16 3 3   | -4.17368    | 21 15 6 6   | -0.27216    |
| 17 13 11 | -23.09181  | 8 8 4 2  | -0.27000    | 17 16 4 4   | 1.40308     | 21 15 7 7   | 0.78621     |
| 17 14 9  | -26.69752  | 8 8 4 3  | 1.50322     | 17 16 5 5   | 0.67574     | 21 15 8 8   | 0.72503     |
| 17 14 10 | -15.23226  | 8 8 4 4  | -0.46820    | 17 16 6 6   | 2.11581     | 21 15 9 9   | -0.16191    |
| 17 14 11 | 51.02851   | 8 8 5 1  | 1.56850     | 17 16 7 7   | 1.52520     | 21 15 11 11 | 0.30546     |
| 17 15 1  | 50.65492   | 8 8 5 2  | 0.58541     | 17 16 8 8   | 0.33604     | 21 15 12 12 | -0.95144    |
| 17 15 2  | 3.63874    | 8 8 5 3  | 1.29191     | 17 16 9 9   | 0.15420     | 21 15 13 13 | 0.61257     |
| 17 15 3  | 36.16176   | 8 8 5 4  | 0.27785     | 17 16 10 10 | 2.14804     | 21 15 15 15 | -1.13128    |
| 17 15 4  | -74.78025  | 8 8 5 5  | 3.09885     | 17 16 11 11 | -1.78081    | 21 16 1 1   | -0.04801    |
| 17 15 5  | 71.44355   | 8 8 6 1  | 0.82054     | 17 16 12 12 | -0.55240    | 21 16 2 2   | 2.87306     |
| 17 15 6  | 22.55662   | 8 8 6 2  | 0.30378     | 17 16 13 13 | -2.52156    | 21 16 3 3   | 2.16064     |
| 17 15 7  | 8.03476    | 8 8 6 3  | -1.19914    | 17 16 14 14 | 2.01038     | 21 16 4 4   | 0.27177     |
| 17 15 8  | -16.48582  | 8 8 6 4  | -1.30691    | 17 16 15 15 | -2.65725    | 21 16 5 5   | 1.21949     |
| 17 16 1  | -1.77772   | 8 8 6 6  | 1.70956     | 17 16 16 15 | -3.47902    | 21 16 6 6   | 3.48674     |
| 17 16 2  | 28.11226   | 8 8 7 1  | -1.32158    | 17 16 16 16 | 13.03092    | 21 16 7 7   | -0.21071    |
| 17 16 3  | -124.32238 | 8 8 7 2  | -0.16016    | 17 17 1 1   | -17.14511   | 21 16 9 9   | 1.44384     |
| 17 16 4  | -49.66231  | 8 8 7 3  | 0.18859     | 17 17 2 1   | 9.99026     | 21 16 10 10 | 0.14517     |
| 17 16 5  | -92.93768  | 8 8 7 4  | -0.67670    | 17 17 2 2   | -59.00093   | 21 16 11 11 | -0.43243    |
| 17 16 6  | 69.64907   | 8 8 7 5  | 1.22260     | 17 17 3 1   | 5.33969     | 21 16 12 12 | 1.39776     |
| 17 16 7  | -56.48753  | 8 8 7 6  | 0.71842     | 17 17 3 2   | -5.94673    | 21 16 13 13 | 0.39015     |
| 17 16 8  | 23.04278   | 8 8 7 7  | 4.52125     | 17 17 3 3   | 31.00221    | 21 16 15 15 | -0.23464    |
| 17 17 1  | 66.15161   | 8 8 8 1  | -0.83803    | 17 17 4 1   | -7.09731    | 21 16 16 16 | 1.93803     |
| 17 17 2  | -80.24776  | 8 8 8 2  | -0.14027    | 17 17 4 3   | -25.69464   | 21 17 1 1   | 9.60448     |
| 17 17 3  | 196.96940  | 8 8 8 3  | -1.32196    | 17 17 4 4   | 22.21328    | 21 17 2 2   | 31.22404    |
| 17 17 4  | -158.25262 | 8 8 8 4  | 2.97137     | 17 17 5 1   | 0.22135     | 21 17 3 3   | -8.80096    |
| 17 17 5  | -79.68943  | 8 8 8 5  | -1.03254    | 17 17 5 2   | 2.05113     | 21 17 4 4   | -3.19089    |
| 17 17 6  | -70.84292  | 8 8 8 6  | 0.77089     | 17 17 5 3   | -2.82015    | 21 17 5 5   | -11.10681   |
| 17 17 7  | 15.47834   | 8 8 8 7  | 1.07927     | 17 17 5 4   | 13.67711    | 21 17 6 6   | -7.60133    |
| 17 17 8  | -4.86385   | 8 8 8 8  | -2.07821    | 17 17 5 5   | 21.48474    | 21 17 7 7   | -7.22326    |
| 18 12 9  | -0.89249   | 9 9 1 1  | -66.43049   | 17 17 6 1   | 0.40509     | 21 17 8 8   | 0.57024     |
| 18 12 10 | 10.71248   | 9 9 2 1  | 66.45195    | 17 17 6 2   | -1.55609    | 21 17 9 9   | -8.29789    |
| 18 12 11 | 19.47043   | 9 9 2 2  | -319.41855  | 17 17 6 3   | -21.48476   | 21 17 10 10 | -5.20810    |
| 18 13 9  | 9.60640    | 9 9 3 1  | 0.10756     | 17 17 6 4   | -2.13610    | 21 17 11 11 | -1.83704    |
| 18 13 10 | -8.08657   | 9 9 3 2  | -3.41463    | 17 17 6 5   | -2.33187    | 21 17 12 12 | -5.87161    |
| 18 13 11 | -15.31412  | 9 9 3 3  | 20.97975    | 17 17 6 6   | 3.81361     | 21 17 13 13 | -10.89528   |
| 18 14 9  | 13.17393   | 9 9 4 1  | -1.09628    | 17 17 7 1   | 0.46449     | 21 17 14 14 | 0.88141     |
| 18 14 10 | 12.19609   | 9 9 4 2  | 3.15444     | 17 17 7 2   | 1.38655     | 21 17 15 15 | 8.97070     |
| 18 14 11 | 19.45612   | 9 9 4 3  | 6.54226     | 17 17 7 3   | 12.17920    | 21 17 16 16 | 32.73493    |
| 18 15 1  | 8.59183    | 9 9 4 4  | 1.92299     | 17 17 7 4   | 5.35930     | 21 17 17 15 | -0.74861    |
| 18 15 2  | 2.01734    | 9 9 5 1  | 0.81504     | 17 17 7 5   | 4.65507     | 21 17 17 16 | 1.12298     |
| 18 15 3  | -15.29365  | 9 9 5 2  | 0.97903     | 17 17 7 6   | -2.46046    | 21 17 17 17 | -1.69750    |
| 18 15 4  | -177.72719 | 9 9 5 3  | 22.32948    | 17 17 7 7   | -2.50427    | 21 18 1 1   | 19.90336    |
| 18 15 5  | 136.17672  | 9 9 5 4  | 5.00357     | 17 17 8 1   | -1.07534    | 21 18 2 2   | -44.16678   |
| 18 15 6  | 125.78802  | 9 9 5 5  | 28.61996    | 17 17 8 2   | -0.54536    | 21 18 3 3   | 10.47457    |
| 18 15 7  | -44.22765  | 9 9 6 1  | -0.10121    | 17 17 8 3   | -4.96011    | 21 18 4 4   | 5.18857     |
| 18 15 8  | -26.03695  | 9 9 6 3  | -15.27203   | 17 17 8 4   | -1.48932    | 21 18 5 5   | 5.65736     |
| 18 16 1  | 1.32256    | 9 9 6 4  | -11.56336   | 17 17 8 5   | -4.48949    | 21 18 6 6   | 0.73811     |
| 18 16 2  | -3.08924   | 9 9 6 5  | -15.43297   | 17 17 8 6   | 0.18223     | 21 18 7 7   | -4.16345    |
| 18 16 3  | 138.34259  | 9 9 6 6  | 10.43765    | 17 17 8 7   | 1.18081     | 21 18 8 8   | -0.30365    |
| 18 16 4  | 25.40871   | 9 9 7 1  | -0.86116    | 17 17 8 8   | -1.13883    | 21 18 9 9   | 12.59228    |
| 18 16 5  | 186.15831  | 9 9 7 2  | 3.57028     | 17 17 9 9   | 4.91865     | 21 18 10 10 | -8.60277    |
| 18 16 6  | -81.42864  | 9 9 7 3  | 14.78543    | 17 17 10 9  | -0.42352    | 21 18 11 11 | 2.24159     |
| 18 16 7  | 84.67077   | 9 9 7 4  | 7.22189     | 17 17 10 10 | 5.57677     | 21 18 12 12 | 4.77908     |
| 18 16 8  | -45.11465  | 9 9 7 5  | 13.80425    | 17 17 11 9  | 12.42904    | 21 18 13 13 | 4.41484     |
| 18 17 1  | 41.56590   | 9 9 7 6  | -9.93228    | 17 17 11 10 | 4.10200     | 21 18 14 14 | 1.89139     |
| 18 17 2  | 124.72557  | 9 9 7 7  | 7.08736     | 17 17 11 11 | -17.49808   | 21 18 15 15 | 22.19141    |
| 18 17 3  | 56.10237   | 9 9 8 1  | -0.73236    | 17 17 12 12 | 5.09935     | 21 18 16 16 | -46.94921   |
| 18 17 4  | -35.16805  | 9 9 8 2  | -0.62505    | 17 17 13 12 | 5.94792     | 21 18 17 17 | 6.07996     |
| 18 17 5  | -26.33495  | 9 9 8 3  | -4.47821    | 17 17 13 13 | 10.17366    | 21 18 18 15 | -2.35339    |
| 18 17 6  | 8.14683    | 9 9 8 4  | -1.30985    | 17 17 14 12 | -8.16191    | 21 18 18 16 | 3.17322     |
| 18 17 7  | -19.21123  | 9 9 8 5  | -6.84876    | 17 17 14 13 | -1.31293    | 21 18 18 17 | -10.95635   |
| 18 18 1  | 196.92638  | 9 9 8 6  | 3.73585     | 17 17 14 14 | -19.83579   | 21 18 18 18 | 6.27515     |
| 18 18 2  | -111.10841 | 9 9 8 7  | -2.60269    | 17 17 15 15 | -15.84242   | 21 19 1 1   | 28.08330    |
| 18 18 3  | 8.96969    | 9 9 8 8  | 0.27991     | 17 17 16 15 | 6.92813     | 21 19 2 2   | 35.85684    |
| 18 18 4  | -11.66476  | 9 9 9 9  | 348.98782   | 17 17 16 16 | -60.14563   | 21 19 3 3   | -6.90772    |
| 18 18 5  | -20.71405  | 10 9 1 1 | 136.31995   | 17 17 17 15 | 6.95716     | 21 19 4 4   | -8.75541    |
| 18 18 6  | -17.71667  | 10 9 2 2 | -102.26990  | 17 17 17 16 | -3.20959    | 21 19 5 5   | -22.93489   |
| 18 18 7  | -27.09809  | 10 9 3 3 | 8.37119     | 17 17 17 17 | 43.66141    | 21 19 6 6   | -5.81384    |

| I J K    | Fl(I,J,K)  | I J K L     | Fl(I,J,K,L) | I J K L     | Fl(I,J,K,L) | I J K L     | Fl(I,J,K,L) |
|----------|------------|-------------|-------------|-------------|-------------|-------------|-------------|
| 18 18 8  | -8.85549   | 10 9 4 4    | -11.97503   | 18 15 1 1   | -4.52706    | 21 19 7 7   | -2.25289    |
| 19 12 9  | -16.89183  | 10 9 5 5    | -2.30088    | 18 15 2 2   | 0.81113     | 21 19 8 8   | -1.40061    |
| 19 12 10 | 21.25970   | 10 9 6 6    | -2.86349    | 18 15 3 3   | 1.75821     | 21 19 9 9   | -10.61359   |
| 19 12 11 | 3.33075    | 10 9 7 7    | 3.22425     | 18 15 4 4   | 5.73491     | 21 19 10 10 | -14.43244   |
| 19 13 9  | 6.89393    | 10 9 8 8    | -0.24285    | 18 15 5 5   | 0.37156     | 21 19 11 11 | -2.36011    |
| 19 13 10 | 14.67332   | 10 9 9 9    | 61.33054    | 18 15 6 6   | -1.36931    | 21 19 12 12 | -9.95723    |
| 19 13 11 | -18.14137  | 10 10 1 1   | -463.18249  | 18 15 7 7   | -1.96007    | 21 19 13 13 | -16.30031   |
| 19 14 9  | -5.62499   | 10 10 2 1   | -107.40853  | 18 15 8 8   | 1.37846     | 21 19 14 14 | -0.93033    |
| 19 14 10 | -2.04643   | 10 10 2 2   | -70.65502   | 18 15 9 9   | 0.30130     | 21 19 15 15 | 28.03475    |
| 19 14 11 | -20.90538  | 10 10 3 1   | 2.29176     | 18 15 10 10 | 2.67310     | 21 19 16 16 | 36.60097    |
| 19 15 1  | -10.56446  | 10 10 3 2   | -1.02254    | 18 15 11 11 | -0.13254    | 21 19 17 17 | -5.91616    |
| 19 15 2  | -1.46931   | 10 10 3 3   | -3.84017    | 18 15 12 12 | 2.43455     | 21 19 18 18 | -17.26268   |
| 19 15 3  | 13.42467   | 10 10 4 1   | -4.18680    | 18 15 13 13 | 1.68176     | 21 19 19 15 | -0.19933    |
| 19 15 4  | -164.22578 | 10 10 4 2   | 0.34516     | 18 15 15 15 | -4.57188    | 21 19 19 16 | 0.68511     |
| 19 15 5  | 216.64831  | 10 10 4 3   | -1.76637    | 18 16 1 1   | -0.30628    | 21 19 19 17 | -8.13621    |
| 19 15 6  | 114.53897  | 10 10 4 4   | 36.87798    | 18 16 2 2   | 1.78187     | 21 19 19 18 | -0.77567    |
| 19 15 7  | -28.60448  | 10 10 5 1   | -4.70598    | 18 16 3 3   | 1.74593     | 21 19 19 19 | -20.24390   |
| 19 15 8  | -45.96652  | 10 10 5 2   | 0.76393     | 18 16 4 4   | 2.47965     | 21 20 1 1   | -11.74582   |
| 19 16 1  | -0.24290   | 10 10 5 3   | 4.09616     | 18 16 5 5   | 0.37714     | 21 20 2 2   | 1.69376     |
| 19 16 2  | -2.31079   | 10 10 5 4   | -41.31674   | 18 16 7 7   | -1.99093    | 21 20 3 3   | -4.51440    |
| 19 16 3  | -100.65965 | 10 10 5 5   | 49.71198    | 18 16 8 8   | 0.18399     | 21 20 4 4   | 1.00534     |
| 19 16 4  | -80.44227  | 10 10 6 1   | -9.01608    | 18 16 9 9   | 2.62093     | 21 20 5 5   | 4.20142     |
| 19 16 5  | -95.22054  | 10 10 6 2   | -4.31739    | 18 16 10 10 | -0.44977    | 21 20 6 6   | -0.55177    |
| 19 16 6  | 99.44986   | 10 10 6 3   | -5.80906    | 18 16 11 11 | 0.30298     | 21 20 7 7   | -10.56356   |
| 19 16 7  | -74.61531  | 10 10 6 4   | -30.21975   | 18 16 12 12 | 5.03451     | 21 20 8 8   | -4.18673    |
| 19 16 8  | 23.97011   | 10 10 6 5   | 28.61955    | 18 16 13 13 | 2.33203     | 21 20 10 10 | 7.18343     |
| 19 17 1  | 75.75230   | 10 10 6 6   | 17.95899    | 18 16 14 14 | -0.58858    | 21 20 11 11 | -0.51304    |
| 19 17 2  | -59.72810  | 10 10 7 1   | -0.85048    | 18 16 15 15 | -0.46189    | 21 20 12 12 | 2.01441     |
| 19 17 3  | -89.53437  | 10 10 7 2   | 0.46280     | 18 16 16 15 | 1.44319     | 21 20 13 13 | 1.72210     |
| 19 17 4  | 69.04106   | 10 10 7 3   | 3.52181     | 18 16 16 16 | -1.39133    | 21 20 14 14 | 3.34034     |
| 19 17 5  | 43.70505   | 10 10 7 4   | 9.15401     | 18 17 1 1   | -31.96670   | 21 20 15 15 | -12.29925   |
| 19 17 6  | 12.77598   | 10 10 7 5   | -8.68585    | 18 17 2 2   | 80.45159    | 21 20 16 16 | 2.57254     |
| 19 17 7  | -14.51604  | 10 10 7 6   | -8.60944    | 18 17 3 3   | -3.62103    | 21 20 18 18 | 1.42910     |
| 19 17 8  | 1.75718    | 10 10 7 7   | 0.78242     | 18 17 4 4   | 8.44231     | 21 20 19 19 | 5.99541     |
| 19 18 1  | 142.40398  | 10 10 8 1   | -2.74285    | 18 17 5 5   | -6.79634    | 21 20 20 15 | -0.17385    |
| 19 18 2  | 166.35233  | 10 10 8 2   | -0.82688    | 18 17 6 6   | -4.59303    | 21 20 20 16 | -0.11963    |
| 19 18 3  | -5.00655   | 10 10 8 4   | 9.71951     | 18 17 7 7   | -5.87197    | 21 20 20 17 | -2.54290    |
| 19 18 4  | 31.89808   | 10 10 8 5   | -12.22272   | 18 17 8 8   | -1.43657    | 21 20 20 18 | -4.21940    |
| 19 18 5  | 7.03153    | 10 10 8 6   | -5.69154    | 18 17 9 9   | -18.70316   | 21 20 20 19 | -1.76450    |
| 19 18 6  | 7.61595    | 10 10 8 7   | 4.94163     | 18 17 10 10 | 12.78977    | 21 20 20 20 | -0.73615    |
| 19 18 7  | -22.58140  | 10 10 8 8   | 1.03679     | 18 17 11 11 | -7.90816    | 21 21 1 1   | -6.64870    |
| 19 18 8  | 14.64079   | 10 10 9 9   | 106.86554   | 18 17 12 12 | -7.63403    | 21 21 2 1   | 2.99043     |
| 19 19 1  | 229.94250  | 10 10 10 9  | -181.40428  | 18 17 13 13 | -6.64628    | 21 21 3 2   | -17.86107   |
| 19 19 2  | -48.82514  | 10 10 10 10 | 667.73080   | 18 17 14 14 | -5.05152    | 21 21 3 1   | 0.20052     |
| 19 19 3  | 42.25907   | 11 9 1 1    | 10.66420    | 18 17 15 15 | -35.87649   | 21 21 3 2   | -1.62996    |
| 19 19 4  | -23.45477  | 11 9 2 2    | -141.62592  | 18 17 16 16 | 84.74044    | 21 21 3 3   | -3.50652    |
| 19 19 5  | -27.94913  | 11 9 3 3    | 22.12433    | 18 17 17 15 | 4.46832     | 21 21 4 1   | 1.34830     |
| 19 19 6  | -19.22500  | 11 9 4 4    | 2.72122     | 18 17 17 16 | 0.83071     | 21 21 4 2   | -0.51680    |
| 19 19 7  | -8.72540   | 11 9 5 5    | 12.79719    | 18 17 17 17 | 3.16623     | 21 21 4 3   | 0.84787     |
| 19 19 8  | 13.48897   | 11 9 6 6    | 9.57414     | 18 18 1 1   | -118.29262  | 21 21 4 4   | 3.68298     |
| 20 12 9  | 9.67872    | 11 9 7 7    | 3.67036     | 18 18 2 1   | 1.84455     | 21 21 5 1   | -0.28776    |
| 20 12 10 | 32.95373   | 11 9 9 9    | 97.39414    | 18 18 2 2   | -129.10090  | 21 21 5 2   | -1.08282    |
| 20 13 9  | 28.39763   | 11 10 1 1   | -66.58754   | 18 18 3 1   | 1.44765     | 21 21 5 3   | 4.20189     |
| 20 13 10 | -15.08921  | 11 10 2 2   | -54.07772   | 18 18 3 2   | -3.32970    | 21 21 5 4   | 0.46804     |
| 20 13 11 | -19.91286  | 11 10 3 3   | 9.44748     | 18 18 3 3   | 21.39588    | 21 21 5 5   | 7.19351     |
| 20 14 9  | -0.76126   | 11 10 4 4   | 6.59771     | 18 18 4 1   | -3.98594    | 21 21 6 1   | -0.45099    |
| 20 14 10 | 16.81665   | 11 10 5 5   | 12.44817    | 18 18 4 2   | -2.87421    | 21 21 6 2   | 0.38204     |
| 20 14 11 | -1.90930   | 11 10 6 6   | 10.74299    | 18 18 4 3   | 7.83441     | 21 21 6 3   | -7.00448    |
| 20 15 1  | 0.18116    | 11 10 7 7   | 1.45460     | 18 18 4 4   | 27.74380    | 21 21 6 4   | -4.91816    |
| 20 15 2  | 3.63872    | 11 10 9 9   | 67.77627    | 18 18 5 1   | 3.72402     | 21 21 6 5   | -1.43611    |
| 20 15 3  | 10.02557   | 11 10 10 9  | -19.03732   | 18 18 5 2   | -2.04158    | 21 21 6 6   | -1.67590    |
| 20 15 4  | 84.96227   | 11 10 10 10 | 114.94699   | 18 18 5 3   | 24.63546    | 21 21 7 1   | -0.72027    |
| 20 15 5  | -86.82013  | 11 11 1 1   | -16.86528   | 18 18 5 4   | -20.83184   | 21 21 7 2   | -0.32471    |
| 20 15 6  | -57.80139  | 11 11 2 1   | 12.12152    | 18 18 5 5   | 58.21551    | 21 21 7 3   | 2.29594     |
| 20 15 7  | 14.74058   | 11 11 2 2   | -64.75116   | 18 18 6 1   | 0.38234     | 21 21 7 4   | -6.47937    |
| 20 15 8  | 25.23320   | 11 11 3 1   | -1.09529    | 18 18 6 3   | -17.39942   | 21 21 7 5   | 2.72118     |
| 20 16 1  | 4.30920    | 11 11 3 2   | -1.20740    | 18 18 6 4   | -26.61249   | 21 21 7 7   | 19.04289    |
| 20 16 2  | -15.61696  | 11 11 3 3   | -19.58339   | 18 18 6 5   | 3.62015     | 21 21 8 1   | -1.21266    |
| 20 16 3  | -8.63087   | 11 11 4 1   | 0.46169     | 18 18 6 6   | 24.33234    | 21 21 8 2   | -0.15297    |
| 20 16 4  | 1.07965    | 11 11 4 2   | 1.17350     | 18 18 7 1   | 0.48184     | 21 21 8 3   | -3.42191    |
| 20 16 5  | -29.77340  | 11 11 4 3   | 8.30779     | 18 18 7 2   | 2.16651     | 21 21 8 4   | -2.85775    |
| 20 16 6  | -9.06724   | 11 11 4 4   | -12.07578   | 18 18 7 3   | 13.04569    | 21 21 8 5   | -1.60259    |
| 20 16 7  | -0.45476   | 11 11 5 1   | 0.99726     | 18 18 7 4   | 14.37723    | 21 21 8 6   | 2.63705     |
| 20 16 8  | 6.51849    | 11 11 5 2   | 0.45246     | 18 18 7 5   | 8.69493     | 21 21 8 7   | 11.73950    |
| 20 17 1  | -25.22614  | 11 11 5 3   | 10.02292    | 18 18 7 6   | -14.22334   | 21 21 8 8   | 5.09128     |
| 20 17 2  | -3.53267   | 11 11 5 4   | -2.89456    | 18 18 7 7   | 12.01548    | 21 21 9 9   | 3.14741     |
| 20 17 3  | 5.69835    | 11 11 5 5   | 2.20165     | 18 18 8 1   | -1.86188    | 21 21 10 9  | 1.19998     |
| 20 17 4  | 42.36686   | 11 11 6 1   | 1.00279     | 18 18 8 2   | -0.87628    | 21 21 10 10 | -0.47669    |
| 20 17 5  | 11.77000   | 11 11 6 3   | -8.98933    | 18 18 8 3   | -6.12615    | 21 21 11 9  | 2.63940     |
| 20 17 6  | 10.21941   | 11 11 6 4   | -6.87968    | 18 18 8 4   | 5.05411     | 21 21 11 10 | 1.32568     |
| 20 17 7  | -32.70268  | 11 11 6 5   | -1.55148    | 18 18 8 5   | -13.10019   | 21 21 11 11 | 0.86212     |
| 20 17 8  | -4.63613   | 11 11 6 6   | -9.47029    | 18 18 8 6   | -0.61393    | 21 21 12 12 | 1.66262     |
| 20 18 1  | -86.19763  | 11 11 7 1   | -0.46631    | 18 18 8 7   | -0.48148    | 21 21 13 12 | 2.81908     |
| 20 18 2  | -4.00660   | 11 11 7 2   | -0.41301    | 18 18 8 8   | 2.03182     | 21 21 13 13 | 4.62593     |
| 20 18 3  | -8.84581   | 11 11 7 3   | -1.59627    | 18 18 9 9   | 28.29950    | 21 21 14 12 | -1.25545    |
| 20 18 4  | 29.86811   | 11 11 7 4   | 2.84457     | 18 18 10 9  | -2.29111    | 21 21 14 14 | -6.94586    |
| 20 18 5  | -30.12367  | 11 11 7 5   | 3.73406     | 18 18 10 10 | 43.54037    | 21 21 15 15 | -6.33004    |
| 20 18 6  | 6.44732    | 11 11 7 6   | -3.32488    | 18 18 11 9  | 11.52472    | 21 21 16 15 | 2.12810     |

| I  | J  | K  | FI(I,J,K) | I  | J  | K  | L  | FI(I,J,K,L) | I  | J  | K  | L  | FI(I,J,K,L) | I  | J  | K  | L  | FI(I,J,K,L) |
|----|----|----|-----------|----|----|----|----|-------------|----|----|----|----|-------------|----|----|----|----|-------------|
| 20 | 18 | 7  | -26.30250 | 11 | 11 | 7  | 7  | -0.57693    | 18 | 18 | 11 | 10 | 10.97556    | 21 | 21 | 16 | 16 | -18.07402   |
| 20 | 18 | 8  | -17.56546 | 11 | 11 | 8  | 1  | -0.44621    | 18 | 18 | 11 | 11 | 0.80961     | 21 | 21 | 17 | 15 | -0.10804    |
| 20 | 19 | 1  | -94.72586 | 11 | 11 | 8  | 4  | -0.65126    | 18 | 18 | 12 | 12 | 29.12506    | 21 | 21 | 17 | 16 | -1.48854    |
| 20 | 19 | 2  | -36.44523 | 11 | 11 | 8  | 5  | -2.20346    | 18 | 18 | 13 | 12 | 1.18335     | 21 | 21 | 17 | 17 | 2.22909     |
| 20 | 19 | 3  | 5.27688   | 11 | 11 | 8  | 6  | 1.95536     | 18 | 18 | 13 | 13 | 44.81029    | 21 | 21 | 18 | 15 | -0.85060    |
| 20 | 19 | 4  | 11.17237  | 11 | 11 | 8  | 7  | -0.62830    | 18 | 18 | 14 | 12 | -8.88863    | 21 | 21 | 18 | 16 | 1.34041     |
| 20 | 19 | 5  | -8.12232  | 11 | 11 | 9  | 9  | 69.86832    | 18 | 18 | 14 | 13 | 1.08360     | 21 | 21 | 18 | 17 | -1.32616    |
| 20 | 19 | 6  | -34.97243 | 11 | 11 | 10 | 9  | 10.03826    | 18 | 18 | 14 | 14 | -3.94883    | 21 | 21 | 18 | 18 | 8.58838     |
| 20 | 19 | 7  | 24.26298  | 11 | 11 | 10 | 10 | 26.48361    | 18 | 18 | 15 | 15 | -118.09641  | 21 | 21 | 19 | 15 | -0.15476    |
| 20 | 19 | 8  | -4.12535  | 11 | 11 | 11 | 9  | 14.09307    | 18 | 18 | 16 | 15 | 1.32815     | 21 | 21 | 19 | 16 | -0.88471    |
| 20 | 20 | 1  | 35.85982  | 11 | 11 | 11 | 10 | 16.05960    | 18 | 18 | 16 | 16 | -129.91401  | 21 | 21 | 19 | 17 | 2.78310     |
| 20 | 20 | 2  | 13.18999  | 11 | 11 | 11 | 11 | 24.50286    | 18 | 18 | 17 | 15 | 3.97203     | 21 | 21 | 19 | 18 | -2.53466    |
| 20 | 20 | 3  | -17.00584 | 12 | 12 | 1  | 1  | -204.74608  | 18 | 18 | 17 | 16 | 0.27275     | 21 | 21 | 19 | 19 | 5.80862     |
| 20 | 20 | 4  | 13.43689  | 12 | 12 | 2  | 1  | 1.29998     | 18 | 18 | 17 | 17 | 16.68498    | 21 | 21 | 20 | 15 | 0.15732     |
| 20 | 20 | 5  | 19.14540  | 12 | 12 | 2  | 2  | -218.48656  | 18 | 18 | 18 | 15 | 2.53710     | 21 | 21 | 20 | 16 | 0.45301     |
| 20 | 20 | 6  | -9.51301  | 12 | 12 | 3  | 1  | -1.25396    | 18 | 18 | 18 | 16 | 5.79176     | 21 | 21 | 20 | 17 | 2.54876     |
| 20 | 20 | 7  | -49.77687 | 12 | 12 | 3  | 2  | -0.19284    | 18 | 18 | 18 | 17 | -12.52116   | 21 | 21 | 20 | 18 | 3.00449     |
| 20 | 20 | 8  | -28.37975 | 12 | 12 | 3  | 3  | 10.79807    | 18 | 18 | 18 | 18 | 52.39754    | 21 | 21 | 20 | 19 | -2.20026    |
| 21 | 12 | 9  | 6.88598   | 12 | 12 | 4  | 1  | -4.42589    | 19 | 15 | 1  | 1  | 2.56154     | 21 | 21 | 20 | 20 | 5.12117     |
| 21 | 12 | 10 | -12.95504 | 12 | 12 | 4  | 2  | 0.45389     | 19 | 15 | 2  | 2  | 0.25647     | 21 | 21 | 21 | 15 | 0.75661     |
| 21 | 12 | 11 | -2.59617  | 12 | 12 | 4  | 3  | 2.90365     | 19 | 15 | 3  | 3  | 0.49289     | 21 | 21 | 21 | 16 | 0.51553     |
| 21 | 13 | 9  | 0.62671   | 12 | 12 | 4  | 4  | 14.29157    | 19 | 15 | 4  | 4  | 4.05746     | 21 | 21 | 21 | 17 | -4.47358    |
| 21 | 13 | 10 | -2.73868  | 12 | 12 | 5  | 1  | 3.39634     | 19 | 15 | 5  | 5  | -2.83817    | 21 | 21 | 21 | 18 | -4.78494    |
| 21 | 13 | 11 | -3.94363  | 12 | 12 | 5  | 2  | -2.58727    | 19 | 15 | 6  | 6  | -2.37205    | 21 | 21 | 21 | 19 | -2.22505    |
| 21 | 14 | 9  | 0.90056   | 12 | 12 | 5  | 3  | 16.30930    | 19 | 15 | 7  | 7  | -1.61578    | 21 | 21 | 21 | 20 | -9.32639    |
| 21 | 14 | 11 | 5.60459   | 12 | 12 | 5  | 4  | -10.41233   | 19 | 15 | 8  | 8  | 1.90517     | 21 | 21 | 21 | 21 | 16.74697    |
| 21 | 15 | 1  | 4.41596   | 12 | 12 | 5  | 5  | 33.54148    | 19 | 15 | 9  | 9  | 1.32901     |    |    |    |    |             |
| 21 | 15 | 2  | 1.37905   | 12 | 12 | 6  | 1  | -1.68352    | 19 | 15 | 10 | 10 | -3.11176    |    |    |    |    |             |

Table S43: The quartic potential energy surface of Thiophene-d4. The calculation was done by using B3LYP/6-311++G(2d,2p) method. The force constants (F<sub>I</sub>) are in cm<sup>-1</sup> units.

| I J   | F <sub>I</sub> (I,J)   | I J K   | F <sub>I</sub> (I,J,K)   | I J K L     | F <sub>I</sub> (I,J,K,L) | I J K L     | F <sub>I</sub> (I,J,K,L) |
|-------|------------------------|---------|--------------------------|-------------|--------------------------|-------------|--------------------------|
| 1 1   | 2417.81227             | 21 15 6 | 66.54527                 | 12 12 6 6   | 12.20272                 | 19 15 14 14 | 0.64627                  |
| 2 2   | 2376.61514             | 21 15 7 | -5.65723                 | 12 12 7 1   | -1.68121                 | 19 15 15 15 | -6.27601                 |
| 3 3   | 1403.63729             | 21 15 8 | 18.31646                 | 12 12 7 2   | -2.05403                 | 19 16 1 1   | -4.78870                 |
| 4 4   | 1265.19821             | 21 16 1 | -3.56067                 | 12 12 7 3   | 3.82223                  | 19 16 2 2   | -3.93378                 |
| 5 5   | 901.67754              | 21 16 2 | 17.38951                 | 12 12 7 4   | 6.76316                  | 19 16 3 3   | -3.36269                 |
| 6 6   | 798.70722              | 21 16 3 | 32.28029                 | 12 12 7 5   | -5.75618                 | 19 16 4 4   | -4.20965                 |
| 7 7   | 735.08106              | 21 16 4 | 34.54839                 | 12 12 7 6   | -3.84324                 | 19 16 5 5   | 0.86791                  |
| 8 8   | 594.13073              | 21 16 5 | -32.49507                | 12 12 7 7   | 9.69153                  | 19 16 6 6   | -0.65249                 |
| 9 9   | 767.90298              | 21 16 6 | -59.21231                | 12 12 8 1   | -1.56279                 | 19 16 7 7   | -0.21306                 |
| 10 10 | 533.76588              | 21 16 7 | 82.92034                 | 12 12 8 2   | 0.52968                  | 19 16 8 8   | 0.33227                  |
| 11 11 | 495.37316              | 21 16 8 | -16.38731                | 12 12 8 3   | -2.10549                 | 19 16 9 9   | 0.41385                  |
| 12 12 | 702.50967              | 21 17 1 | -31.78849                | 12 12 8 4   | 1.13341                  | 19 16 10 10 | 0.84321                  |
| 13 13 | 539.52261              | 21 17 2 | 24.51461                 | 12 12 8 5   | -3.23716                 | 19 16 11 11 | 2.37947                  |
| 14 14 | 421.91169              | 21 17 3 | 39.75310                 | 12 12 8 6   | 5.23798                  | 19 16 12 12 | 2.59632                  |
| 15 15 | 2409.02605             | 21 17 4 | -16.87750                | 12 12 8 7   | -0.28732                 | 19 16 13 13 | 2.59211                  |
| 16 16 | 2361.75934             | 21 17 5 | 21.56355                 | 12 12 8 8   | 0.56810                  | 19 16 14 14 | 0.92006                  |
| 17 17 | 1487.12065             | 21 17 6 | -3.36828                 | 12 12 9 9   | 39.11047                 | 19 16 15 15 | -5.15984                 |
| 18 18 | 1043.48636             | 21 17 7 | 22.57831                 | 12 12 10 9  | 1.40315                  | 19 16 16 15 | 2.81776                  |
| 19 19 | 860.79530              | 21 17 8 | 3.68839                  | 12 12 10 10 | 97.22788                 | 19 16 16 16 | -7.63965                 |
| 20 20 | 764.04221              | 21 18 1 | 5.67861                  | 12 12 11 9  | -51.02424                | 19 17 1 1   | 11.23702                 |
| 21 21 | 711.63857              | 21 18 2 | 78.77875                 | 12 12 11 10 | 13.33620                 | 19 17 2 2   | 20.78536                 |
|       |                        | 21 18 3 | -7.74651                 | 12 12 11 11 | 43.45665                 | 19 17 3 3   | 10.21229                 |
| I J K | F <sub>I</sub> (I,J,K) | 21 18 4 | 38.53803                 | 12 12 12 12 | 37.88931                 | 19 17 4 4   | 7.50378                  |
|       |                        | 21 18 5 | -44.55601                | 13 12 1 1   | 62.27658                 | 19 17 5 5   | -0.99479                 |
| 1 1 1 | -669.34054             | 21 18 6 | -9.02336                 | 13 12 2 2   | -67.90301                | 19 17 6 6   | -5.95213                 |
| 2 1 1 | -155.75720             | 21 18 7 | -33.54570                | 13 12 3 3   | 6.59002                  | 19 17 7 7   | -7.10421                 |
| 2 2 1 | -476.29663             | 21 18 8 | -35.85248                | 13 12 4 4   | -1.83455                 | 19 17 8 8   | -1.48268                 |
| 2 2 2 | 504.13705              | 21 19 1 | 39.09473                 | 13 12 5 5   | -5.94295                 | 19 17 9 9   | -4.36915                 |
| 3 1 1 | 72.88802               | 21 19 2 | -48.83302                | 13 12 6 6   | 3.51238                  | 19 17 10 10 | -2.80050                 |
| 3 2 1 | 23.59625               | 21 19 3 | -1.33821                 | 13 12 7 7   | 9.83105                  | 19 17 11 11 | -4.53841                 |
| 3 2 2 | 10.09948               | 21 19 4 | 8.52854                  | 13 12 8 8   | -1.09880                 | 19 17 12 12 | -4.90960                 |
| 3 3 1 | 87.68736               | 21 19 5 | 2.67327                  | 13 12 9 9   | 65.67555                 | 19 17 13 13 | -4.35262                 |
| 3 3 2 | -81.08136              | 21 19 6 | 3.33784                  | 13 12 10 10 | -118.30726               | 19 17 14 14 | -4.15208                 |
| 3 3 3 | 129.37739              | 21 19 7 | -4.85787                 | 13 12 11 11 | 56.78515                 | 19 17 15 15 | 9.42735                  |
| 4 1 1 | -51.16347              | 21 19 8 | -5.97025                 | 13 12 12 12 | 17.59781                 | 19 17 16 16 | 22.03042                 |
| 4 2 1 | 28.84680               | 21 20 1 | -55.06461                | 13 13 1 1   | -137.42420               | 19 17 17 15 | 1.19320                  |
| 4 2 2 | -80.83329              | 21 20 2 | -5.12626                 | 13 13 2 1   | 1.63164                  | 19 17 17 16 | -0.69811                 |
| 4 3 1 | -21.66597              | 21 20 3 | -5.34768                 | 13 13 2 2   | -144.21977               | 19 17 17 17 | 16.56020                 |
| 4 3 2 | -57.76723              | 21 20 4 | 18.04336                 | 13 13 3 1   | 10.55009                 | 19 18 1 1   | -3.15716                 |
| 4 3 3 | -219.54829             | 21 20 5 | -32.60263                | 13 13 3 2   | 2.88407                  | 19 18 2 2   | 33.50981                 |
| 4 4 1 | 66.38089               | 21 20 6 | -11.62267                | 13 13 3 3   | 2.53836                  | 19 18 3 3   | -9.31979                 |
| 4 4 2 | -0.89254               | 21 20 7 | -26.67959                | 13 13 4 1   | -10.52932                | 19 18 4 4   | 0.59427                  |
| 4 4 3 | -45.87044              | 21 20 8 | -28.77562                | 13 13 4 2   | 10.39224                 | 19 18 5 5   | 2.49217                  |
| 4 4 4 | -91.19211              | 21 21 1 | 46.29396                 | 13 13 4 3   | 1.19292                  | 19 18 6 6   | -6.71843                 |
| 5 1 1 | -46.64606              | 21 21 2 | -37.22644                | 13 13 4 4   | 1.74769                  | 19 18 7 7   | -8.13069                 |
| 5 2 1 | 0.41604                | 21 21 3 | -2.65052                 | 13 13 5 1   | -8.74272                 | 19 18 8 8   | 1.45138                  |
| 5 2 2 | -48.39903              | 21 21 4 | 41.39300                 | 13 13 5 2   | 2.62377                  | 19 18 9 9   | -5.97597                 |
| 5 3 1 | 19.66556               | 21 21 5 | -51.29302                | 13 13 5 3   | 1.36790                  | 19 18 10 10 | 2.96575                  |
| 5 3 2 | 8.08530                | 21 21 6 | 6.73424                  | 13 13 5 4   | -7.36761                 | 19 18 11 11 | -4.28610                 |
| 5 3 3 | -112.42026             | 21 21 7 | -56.84776                | 13 13 5 5   | 7.67594                  | 19 18 12 12 | -4.14486                 |
| 5 4 1 | -45.45761              | 21 21 8 | -60.89026                | 13 13 6 1   | -0.44900                 | 19 18 13 13 | -6.54614                 |
| 5 4 2 | -41.05191              |         |                          | 13 13 6 2   | -0.81500                 | 19 18 15 15 | -9.40667                 |
| 5 4 3 | -53.19996              | I J K L | F <sub>I</sub> (I,J,K,L) | 13 13 6 3   | -10.17236                | 19 18 16 16 | 39.74828                 |
| 5 4 4 | -100.43247             |         |                          | 13 13 6 4   | 2.56779                  | 19 18 17 17 | -7.48243                 |
| 5 5 1 | 80.15575               | 1 1 1 1 | 186.62221                | 13 13 6 5   | -6.95482                 | 19 18 18 15 | -0.42394                 |
| 5 5 2 | 20.48247               | 2 1 1 1 | 67.64311                 | 13 13 6 6   | 23.36326                 | 19 18 18 16 | 0.98148                  |
| 5 5 3 | -54.86432              | 2 2 1 1 | 96.89946                 | 13 13 7 1   | -1.25021                 | 19 18 18 17 | -5.56689                 |
| 5 5 4 | -30.65724              | 2 2 2 1 | -66.74040                | 13 13 7 2   | -1.34951                 | 19 18 18 18 | -4.04946                 |
| 5 5 5 | -95.28668              | 2 2 2 2 | 192.02892                | 13 13 7 3   | 6.61694                  | 19 19 1 1   | -13.50880                |
| 6 1 1 | -5.37258               | 3 1 1 1 | -17.96587                | 13 13 7 4   | 10.25289                 | 19 19 2 1   | 14.26521                 |
| 6 2 1 | -3.52631               | 3 2 1 1 | -8.72897                 | 13 13 7 5   | -9.76870                 | 19 19 2 2   | -33.97105                |
| 6 2 2 | 3.86614                | 3 2 2 1 | -5.88263                 | 13 13 7 6   | -7.07693                 | 19 19 3 2   | -3.35623                 |
| 6 3 1 | -34.83960              | 3 2 2 2 | -1.73763                 | 13 13 7 7   | 17.28799                 | 19 19 3 3   | -4.40980                 |
| 6 3 2 | 37.30514               | 3 3 1 1 | -3.02750                 | 13 13 8 1   | -0.53082                 | 19 19 4 1   | -1.13020                 |
| 6 3 3 | 32.64184               | 3 3 2 1 | 4.54344                  | 13 13 8 2   | 1.35263                  | 19 19 4 2   | 2.01326                  |
| 6 4 1 | 35.62635               | 3 3 2 2 | -15.84771                | 13 13 8 3   | -4.43260                 | 19 19 4 3   | -0.54513                 |
| 6 4 2 | 57.18942               | 3 3 3 1 | 8.87718                  | 13 13 8 4   | 2.28064                  | 19 19 4 4   | 1.35584                  |
| 6 4 3 | -41.59551              | 3 3 3 2 | 63.06879                 | 13 13 8 5   | -4.73290                 | 19 19 5 1   | -0.40540                 |
| 6 4 4 | -2.95420               | 4 1 1 1 | 10.73656                 | 13 13 8 6   | 10.44358                 | 19 19 5 2   | 0.25139                  |
| 6 5 1 | -62.26218              | 4 2 1 1 | -2.33856                 | 13 13 8 7   | -0.52406                 | 19 19 5 3   | -2.16122                 |
| 6 5 2 | -61.09874              | 4 2 2 1 | 13.11136                 | 13 13 8 8   | 2.95872                  | 19 19 5 4   | -1.14973                 |
| 6 5 3 | -19.51901              | 4 2 2 2 | -22.84167                | 13 13 9 9   | 86.71148                 | 19 19 5 5   | 1.47135                  |
| 6 5 4 | -16.88361              | 4 3 1 1 | 1.38692                  | 13 13 10 9  | 7.99159                  | 19 19 6 1   | 1.04151                  |
| 6 5 5 | -15.57758              | 4 3 2 2 | -7.59995                 | 13 13 10 10 | 168.14671                | 19 19 6 2   | -1.03047                 |
| 6 6 1 | 131.30810              | 4 3 3 1 | -12.37452                | 13 13 11 9  | -77.72055                | 19 19 6 3   | -4.69006                 |
| 6 6 2 | -48.53656              | 4 3 3 2 | 6.22305                  | 13 13 11 10 | 24.61474                 | 19 19 6 4   | -2.98990                 |
| 6 6 3 | -2.95619               | 4 3 3 3 | -6.21584                 | 13 13 11 11 | 68.23253                 | 19 19 6 5   | 0.63662                  |
| 6 6 4 | -8.40753               | 4 4 1 1 | -22.93521                | 13 13 12 12 | 118.39626                | 19 19 6 6   | 12.11987                 |
| 6 6 5 | -3.96452               | 4 4 2 1 | -8.73733                 | 13 13 13 12 | 17.23205                 | 19 19 7 1   | 0.19238                  |
| 6 6 6 | -3.47079               | 4 4 2 2 | -11.68767                | 13 13 13 13 | 188.75840                | 19 19 7 2   | 0.86638                  |
| 7 1 1 | -14.82034              | 4 4 3 1 | 1.14670                  | 14 12 1 1   | 52.41178                 | 19 19 7 3   | 6.89340                  |
| 7 2 1 | -9.99768               | 4 4 3 2 | 10.32927                 | 14 12 2 2   | 30.38450                 | 19 19 7 4   | 2.58771                  |
| 7 2 2 | -4.10996               | 4 4 3 3 | 29.25007                 | 14 12 3 3   | -9.95660                 | 19 19 7 5   | -3.23344                 |
| 7 3 1 | 23.70573               | 4 4 4 1 | -4.35070                 | 14 12 4 4   | -4.07478                 | 19 19 7 6   | -8.70185                 |
| 7 3 2 | -49.47572              | 4 4 4 2 | 3.11535                  | 14 12 5 5   | -5.01810                 | 19 19 7 7   | 10.08232                 |







| I J K    | F(I,J,K)   | I J K L  | F(I,J,,K,L) | I J K L     | F(I,J,K,L) | I J K L     | F(I,J,K,L) |
|----------|------------|----------|-------------|-------------|------------|-------------|------------|
| 16 15 1  | -123.78201 | 8 7 1 1  | -10.42770   | 16 16 14 13 | 13.27941   | 20 20 18 16 | 0.47210    |
| 16 15 2  | -373.57249 | 8 7 2 2  | 9.10785     | 16 16 14 14 | -9.62468   | 20 20 18 17 | -8.43801   |
| 16 15 3  | 6.94111    | 8 7 3 3  | 0.13243     | 16 16 15 15 | 59.07038   | 20 20 18 18 | 20.27765   |
| 16 15 4  | 19.16969   | 8 7 4 4  | 3.31623     | 16 16 16 15 | -71.14239  | 20 20 19 15 | 1.02945    |
| 16 15 5  | -1.70127   | 8 7 5 5  | 6.56618     | 16 16 16 16 | 235.07684  | 20 20 19 16 | 0.68187    |
| 16 15 6  | -1.91324   | 8 7 6 6  | -1.87905    | 17 15 1 1   | -25.07695  | 20 20 19 17 | -3.09639   |
| 16 15 7  | -9.67584   | 8 7 7 1  | -1.20889    | 17 15 2 2   | -14.20475  | 20 20 19 18 | 5.28118    |
| 16 15 8  | 3.71678    | 8 7 7 2  | -0.14065    | 17 15 3 3   | 12.98113   | 20 20 19 19 | 3.21905    |
| 16 16 1  | -443.45662 | 8 7 7 3  | -3.20654    | 17 15 4 4   | 4.02591    | 20 20 20 15 | -2.44696   |
| 16 16 2  | 631.14322  | 8 7 7 4  | -1.93168    | 17 15 5 5   | 1.78623    | 20 20 20 16 | -1.46192   |
| 16 16 3  | 22.47610   | 8 7 7 5  | 2.44107     | 17 15 6 6   | 7.24887    | 20 20 20 17 | 12.05678   |
| 16 16 4  | -77.02481  | 8 7 7 6  | 8.09174     | 17 15 7 7   | 2.69713    | 20 20 20 18 | -26.11787  |
| 16 16 5  | -41.12404  | 8 7 7 7  | -1.54565    | 17 15 8 8   | 1.00083    | 20 20 20 19 | -10.57859  |
| 16 16 6  | 3.34692    | 8 8 1 1  | -11.90072   | 17 15 9 9   | 0.65731    | 20 20 20 20 | 39.85177   |
| 16 16 7  | -0.49055   | 8 8 2 1  | -3.88885    | 17 15 10 10 | 24.46313   | 21 15 1 1   | -1.38365   |
| 16 16 8  | -8.81632   | 8 8 2 2  | -6.71082    | 17 15 11 11 | -0.14228   | 21 15 2 2   | -2.46812   |
| 17 12 9  | 19.90160   | 8 8 3 1  | 0.62478     | 17 15 12 12 | 7.64789    | 21 15 3 3   | -0.17218   |
| 17 12 10 | 21.19019   | 8 8 3 2  | 0.36986     | 17 15 13 13 | 17.61928   | 21 15 4 4   | -0.36556   |
| 17 12 11 | 19.71643   | 8 8 3 3  | 0.16746     | 17 15 14 14 | 1.64633    | 21 15 5 5   | 1.61876    |
| 17 13 9  | -5.83754   | 8 8 4 1  | -0.53910    | 17 15 15 15 | -27.07974  | 21 15 6 6   | 0.15471    |
| 17 13 10 | -31.80687  | 8 8 4 2  | 0.20704     | 17 16 1 1   | -2.46899   | 21 15 7 7   | -0.30501   |
| 17 13 11 | -31.76409  | 8 8 4 3  | 0.42711     | 17 16 2 2   | 18.47233   | 21 15 8 8   | 1.10960    |
| 17 14 9  | 30.41632   | 8 8 4 4  | 0.88448     | 17 16 3 3   | -6.95117   | 21 15 9 9   | 0.50271    |
| 17 14 10 | -16.27405  | 8 8 5 1  | -0.86252    | 17 16 4 4   | 5.69564    | 21 15 10 10 | 1.63798    |
| 17 14 11 | 33.99005   | 8 8 5 4  | -2.48888    | 17 16 5 5   | 0.82478    | 21 15 11 11 | 0.48450    |
| 17 15 1  | 104.55138  | 8 8 5 5  | 5.55054     | 17 16 6 6   | -1.97983   | 21 15 12 12 | -0.13704   |
| 17 15 2  | 8.98071    | 8 8 6 1  | -0.70584    | 17 16 7 7   | -2.49685   | 21 15 13 13 | 1.88587    |
| 17 15 3  | 77.28951   | 8 8 6 2  | -0.32677    | 17 16 8 8   | -5.30442   | 21 15 14 14 | -1.31023   |
| 17 15 4  | -48.11850  | 8 8 6 3  | -0.95295    | 17 16 9 9   | 7.65028    | 21 16 1 1   | 0.26113    |
| 17 15 5  | 27.50075   | 8 8 6 4  | 0.29999     | 17 16 10 10 | -7.86266   | 21 16 2 2   | 7.09287    |
| 17 15 6  | -37.17793  | 8 8 6 5  | -2.23320    | 17 16 11 11 | -2.67343   | 21 16 3 3   | 1.32817    |
| 17 15 7  | 7.50985    | 8 8 6 6  | 4.60359     | 17 16 12 12 | -6.96550   | 21 16 4 4   | -1.16589   |
| 17 15 8  | -18.35795  | 8 8 7 1  | -1.10688    | 17 16 13 13 | 3.24655    | 21 16 5 5   | 2.75088    |
| 17 16 1  | -16.15651  | 8 8 7 2  | -0.75526    | 17 16 14 14 | -5.94572   | 21 16 6 6   | -0.52233   |
| 17 16 2  | 77.34598   | 8 8 7 3  | 0.87510     | 17 16 15 15 | -12.94687  | 21 16 7 7   | -0.26499   |
| 17 16 3  | -60.85217  | 8 8 7 4  | 0.65733     | 17 16 16 16 | 24.26676   | 21 16 8 8   | 0.36037    |
| 17 16 4  | -38.01000  | 8 8 7 5  | 3.80201     | 17 17 1 1   | -3.51962   | 21 16 9 9   | -1.59598   |
| 17 16 5  | 23.36663   | 8 8 8 1  | -1.51246    | 17 17 2 2   | 1.40886    | 21 16 10 10 | 0.50138    |
| 17 16 6  | 27.71440   | 8 8 8 2  | -0.39578    | 17 17 3 3   | 44.17374   | 21 16 11 11 | -1.79699   |
| 17 16 7  | -44.47878  | 8 8 8 3  | -1.72511    | 17 17 4 4   | -8.16082   | 21 16 12 12 | -1.94493   |
| 17 16 8  | 5.68652    | 8 8 8 4  | 2.45621     | 17 17 5 5   | 16.31416   | 21 16 13 13 | -1.79493   |
| 17 17 1  | 78.27420   | 8 8 8 5  | -0.56348    | 17 17 6 6   | -6.72940   | 21 16 14 14 | -1.22264   |
| 17 17 2  | -18.81532  | 8 8 8 6  | 2.75323     | 17 17 7 7   | 44.17374   | 21 16 15 15 | -0.98580   |
| 17 17 3  | 253.08159  | 8 8 8 7  | 1.35716     | 17 17 8 8   | -8.16082   | 21 16 16 16 | 4.80942    |
| 17 17 4  | -119.04545 | 8 8 8 8  | -0.55027    | 17 17 9 9   | -5.31809   | 21 17 1 1   | 10.87544   |
| 17 17 5  | -55.41403  | 9 9 1 1  | -39.00209   | 17 17 10 10 | -28.67560  | 21 17 2 2   | 18.81372   |
| 17 17 6  | 52.75865   | 9 9 2 1  | 42.44185    | 17 17 11 11 | 1.62794    | 21 17 3 3   | 1.24774    |
| 17 17 7  | 16.60144   | 9 9 2 2  | -99.11973   | 17 17 12 12 | 0.70264    | 21 17 4 4   | -4.54778   |
| 17 17 8  | 5.19017    | 9 9 3 1  | 0.57004     | 17 17 13 13 | 2.97896    | 21 17 5 5   | -5.80241   |
| 18 12 9  | -4.34478   | 9 9 3 2  | -3.40013    | 17 17 14 14 | -9.29383   | 21 17 6 6   | -6.08058   |
| 18 12 10 | -12.51980  | 9 9 3 3  | -10.32706   | 17 17 15 15 | 2.45319    | 21 17 7 7   | -8.91963   |
| 18 12 11 | -11.80389  | 9 9 4 1  | -2.09400    | 17 17 16 16 | 0.81375    | 21 17 8 8   | -0.49112   |
| 18 13 9  | 9.05846    | 9 9 4 2  | 4.64653     | 17 17 17 17 | -3.24476   | 21 17 9 9   | -3.22971   |
| 18 13 10 | 3.94266    | 9 9 4 3  | -0.78070    | 17 17 18 18 | 1.75901    | 21 17 10 10 | -3.23241   |
| 18 13 11 | 12.15639   | 9 9 4 4  | -10.73829   | 17 17 19 19 | 8.18698    | 21 17 11 11 | -3.87253   |
| 18 14 9  | 11.72550   | 9 9 5 1  | -0.64180    | 17 17 20 20 | -4.06248   | 21 17 12 12 | -3.64290   |
| 18 14 10 | -8.22806   | 9 9 5 2  | 1.50789     | 17 17 21 21 | -2.02466   | 21 17 13 13 | -6.95478   |
| 18 14 11 | -5.31603   | 9 9 5 3  | -3.19763    | 17 17 22 22 | 3.39466    | 21 17 14 14 | 9.56811    |
| 18 15 1  | 9.06500    | 9 9 5 4  | -6.50551    | 17 17 23 23 | 0.75773    | 21 17 15 15 | 20.87115   |
| 18 15 2  | 4.98066    | 9 9 5 5  | -2.90354    | 17 17 24 24 | -2.75696   | 21 17 16 16 | -1.07453   |
| 18 15 3  | -13.66812  | 9 9 6 1  | -0.52693    | 17 17 25 25 | 7.67960    | 21 17 17 17 | 2.09516    |
| 18 15 4  | 67.51472   | 9 9 6 2  | -1.13553    | 17 17 26 26 | 6.06835    | 21 17 18 18 | 5.48520    |
| 18 15 5  | -77.62339  | 9 9 6 3  | -7.67239    | 17 17 27 27 | -2.36257   | 21 18 1 1   | -5.72810   |
| 18 15 6  | 49.56242   | 9 9 6 4  | -2.74953    | 17 17 28 28 | -1.88661   | 21 18 2 2   | 28.89919   |
| 18 15 7  | 80.43442   | 9 9 6 5  | 0.93371     | 17 17 29 29 | 2.55780    | 21 18 3 3   | -4.05464   |
| 18 15 8  | 22.76935   | 9 9 6 6  | 8.78030     | 17 17 30 30 | -2.46003   | 21 18 4 4   | 2.92308    |
| 18 16 1  | 5.03718    | 9 9 7 1  | -1.05325    | 17 17 31 31 | -0.85471   | 21 18 5 5   | 8.38526    |
| 18 16 2  | 1.59379    | 9 9 7 2  | 0.78961     | 17 17 32 32 | -0.31486   | 21 18 6 6   | -5.64748   |
| 18 16 3  | -63.91247  | 9 9 7 3  | 6.43444     | 17 17 33 33 | -2.45016   | 21 18 7 7   | -4.57756   |
| 18 16 4  | -3.55253   | 9 9 7 4  | 5.50800     | 17 17 34 34 | 2.53785    | 21 18 8 8   | 2.93774    |
| 18 16 5  | -11.98643  | 9 9 7 5  | -1.81193    | 17 17 35 35 | 2.29889    | 21 18 9 9   | -6.54037   |
| 18 16 6  | 108.80789  | 9 9 7 6  | -8.67446    | 17 17 36 36 | -1.03847   | 21 18 10 10 | 6.04767    |
| 18 16 7  | -70.96053  | 9 9 7 7  | 9.59705     | 17 17 37 37 | -13.67113  | 21 18 11 11 | -5.12040   |
| 18 16 8  | 37.79497   | 9 9 8 1  | -0.99143    | 17 17 38 38 | 0.51293    | 21 18 12 12 | -3.32073   |
| 18 17 1  | -20.22029  | 9 9 8 2  | 0.61664     | 17 17 39 39 | 0.39445    | 21 18 13 13 | -5.00962   |
| 18 17 2  | -63.36489  | 9 9 8 3  | -1.03137    | 17 17 40 40 | -11.44504  | 21 18 14 14 | -1.71566   |
| 18 17 3  | -17.68371  | 9 9 8 4  | 0.51066     | 17 17 41 41 | -1.80299   | 21 18 15 15 | -11.75760  |
| 18 17 4  | -18.87340  | 9 9 8 5  | 2.61325     | 17 17 42 42 | -13.03508  | 21 18 16 16 | 35.66070   |
| 18 17 5  | 17.09371   | 9 9 8 6  | -2.22116    | 17 17 43 43 | -9.26930   | 21 18 17 17 | -1.01649   |
| 18 17 6  | -4.73631   | 9 9 8 7  | 0.39037     | 17 17 44 44 | 1.31586    | 21 18 18 18 | -0.25105   |
| 18 17 7  | 24.79877   | 9 9 9 1  | 125.48451   | 17 17 45 45 | -0.87199   | 21 18 19 19 | 1.04813    |
| 18 17 8  | 6.52428    | 10 9 1 1 | -40.14187   | 17 17 46 46 | -11.32972  | 21 18 20 20 | -7.32616   |
| 18 18 1  | 100.61895  | 10 9 2 2 | 14.15441    | 17 17 47 47 | 1.13004    | 21 19 1 1   | -12.29877  |
| 18 18 2  | -24.70450  | 10 9 4 4 | 4.26071     | 17 17 48 48 | -15.12500  | 21 19 2 2   | -29.61470  |
| 18 18 3  | -13.75996  | 10 9 5 5 | 4.96808     | 17 17 49 49 | -2.66342   | 21 19 3 3   | 7.07168    |
| 18 18 4  | 26.19010   | 10 9 6 6 | 0.41563     | 17 17 50 50 | -0.30962   | 21 19 4 4   | 4.48620    |
| 18 18 5  | -42.70717  | 10 9 7 7 | -2.28563    | 17 17 51 51 | -11.63861  | 21 19 5 5   | 2.24596    |
| 18 18 6  | 8.87829    | 10 9 8 8 | 0.92839     | 17 17 52 52 | 16.73201   | 21 19 6 6   | 12.12974   |
|          |            |          |             | 17 17 53 53 | -6.52607   | 21 19 7 7   | 10.29081   |

| I J K    | F(I,J,K)   | I J K L     | F(I,J,K,L) | I J K L     | F(I,J,K,L) | I J K L     | F(I,J,K,L) |
|----------|------------|-------------|------------|-------------|------------|-------------|------------|
| 18 18 7  | -27.10997  | 10 9 9 9    | 10.26860   | 17 17 17 17 | 47.77881   | 21 19 8 8   | 3.26132    |
| 18 18 8  | -25.84685  | 10 10 1 1   | -206.54453 | 18 15 1 1   | -2.11434   | 21 19 9 9   | 5.31891    |
| 19 12 9  | -0.90934   | 10 10 2 1   | -105.34831 | 18 15 2 2   | -1.60482   | 21 19 10 10 | 2.89452    |
| 19 12 10 | -14.84796  | 10 10 2 2   | -66.89820  | 18 15 3 3   | -4.74959   | 21 19 11 11 | 5.18728    |
| 19 12 11 | 8.94978    | 10 10 3 1   | 15.29292   | 18 15 4 4   | -1.49317   | 21 19 12 12 | 4.85664    |
| 19 13 9  | 16.55314   | 10 10 3 2   | 5.95551    | 18 15 5 5   | 3.42899    | 21 19 13 13 | 10.01871   |
| 19 13 10 | -8.49017   | 10 10 3 3   | -5.39844   | 18 15 7 7   | 0.71006    | 21 19 15 15 | -9.54159   |
| 19 13 11 | 15.82787   | 10 10 4 1   | -6.43650   | 18 15 8 8   | 0.14172    | 21 19 16 16 | -33.42657  |
| 19 14 9  | 1.09035    | 10 10 4 2   | -3.44450   | 18 15 9 9   | 0.11988    | 21 19 17 17 | 3.13587    |
| 19 14 10 | -2.54489   | 10 10 4 3   | -6.73473   | 18 15 10 10 | 2.38345    | 21 19 18 18 | 8.17998    |
| 19 14 11 | 12.98294   | 10 10 4 4   | 2.38537    | 18 15 11 11 | 0.43471    | 21 19 19 19 | 0.23441    |
| 19 15 1  | 20.58628   | 10 10 5 1   | -10.98607  | 18 15 12 12 | 0.29640    | 21 19 19 16 | -0.14953   |
| 19 15 2  | 13.61375   | 10 10 5 2   | -6.94131   | 18 15 13 13 | 1.62486    | 21 19 19 17 | -3.08572   |
| 19 15 3  | -15.34952  | 10 10 5 3   | 3.49913    | 18 15 14 14 | 0.48457    | 21 19 19 18 | -6.71887   |
| 19 15 4  | -7.00894   | 10 10 5 4   | -12.60612  | 18 15 15 15 | -2.53875   | 21 19 19 19 | 5.80696    |
| 19 15 5  | -17.52651  | 10 10 5 5   | 11.45410   | 18 16 1 1   | -1.41206   | 21 20 1 1   | 24.05662   |
| 19 15 6  | 55.73230   | 10 10 6 2   | -0.95326   | 18 16 2 2   | -4.68310   | 21 20 2 2   | 16.61501   |
| 19 15 7  | -4.49160   | 10 10 6 3   | -5.86613   | 18 16 3 3   | -2.58294   | 21 20 3 3   | 0.39799    |
| 19 15 8  | 18.83705   | 10 10 6 4   | 11.64596   | 18 16 4 4   | 0.60931    | 21 20 4 4   | 0.50964    |
| 19 16 1  | 12.26346   | 10 10 6 5   | -17.85864  | 18 16 5 5   | 0.66194    | 21 20 5 5   | -1.22354   |
| 19 16 2  | -6.52726   | 10 10 6 6   | 18.72166   | 18 16 6 6   | -0.25028   | 21 20 6 6   | -12.51276  |
| 19 16 3  | 31.36412   | 10 10 7 1   | -2.82768   | 18 16 7 7   | 1.00369    | 21 20 7 7   | -3.16287   |
| 19 16 4  | 44.43991   | 10 10 7 2   | -0.50899   | 18 16 9 9   | -0.25021   | 21 20 8 8   | 0.77477    |
| 19 16 5  | -21.49958  | 10 10 7 3   | -0.73530   | 18 16 10 10 | 1.40556    | 21 20 9 9   | -2.71478   |
| 19 16 6  | -65.70561  | 10 10 7 4   | 8.57506    | 18 16 11 11 | 0.59828    | 21 20 10 10 | -13.16545  |
| 19 16 7  | 79.57196   | 10 10 7 5   | -12.29370  | 18 16 12 12 | -2.75896   | 21 20 11 11 | -1.58781   |
| 19 16 8  | -19.82563  | 10 10 7 6   | 11.85716   | 18 16 13 13 | 0.44890    | 21 20 12 12 | -5.52748   |
| 19 17 1  | -11.30910  | 10 10 7 7   | 5.45086    | 18 16 14 14 | 0.76629    | 21 20 13 13 | -9.37528   |
| 19 17 2  | 10.42923   | 10 10 8 1   | 0.48038    | 18 16 15 15 | -0.77628   | 21 20 14 14 | -3.85054   |
| 19 17 3  | 66.75574   | 10 10 8 2   | 0.40483    | 18 16 16 15 | -2.56889   | 21 20 15 15 | 25.51130   |
| 19 17 4  | -50.86990  | 10 10 8 3   | -1.92321   | 18 16 16 16 | -0.63253   | 21 20 16 16 | 15.17407   |
| 19 17 5  | 13.27387   | 10 10 8 4   | 6.73603    | 18 17 1 1   | 8.27298    | 21 20 17 17 | -0.86592   |
| 19 17 6  | 21.75572   | 10 10 8 5   | -7.64353   | 18 17 2 2   | -17.19342  | 21 20 18 18 | -4.36903   |
| 19 17 7  | 2.61607    | 10 10 8 6   | 11.54680   | 18 17 3 3   | -5.94544   | 21 20 19 19 | -3.81097   |
| 19 18 1  | -13.95536  | 10 10 8 7   | 7.86544    | 18 17 4 4   | 4.94899    | 21 20 20 15 | -0.22810   |
| 19 18 2  | 70.48485   | 10 10 8 8   | 4.33866    | 18 17 5 5   | -4.85939   | 21 20 20 16 | 0.18739    |
| 19 18 3  | -6.63342   | 10 10 9 9   | 38.29276   | 18 17 6 6   | 1.92127    | 21 20 20 17 | -4.91847   |
| 19 18 4  | 16.93148   | 10 10 10 9  | 80.00166   | 18 17 7 7   | 4.43390    | 21 20 20 18 | 9.62348    |
| 19 18 5  | -10.78373  | 10 10 10 10 | 352.36402  | 18 17 8 8   | -0.36735   | 21 20 20 19 | 4.39645    |
| 19 18 6  | 8.61249    | 11 9 1 1    | 21.63123   | 18 17 9 9   | 4.47326    | 21 20 20 20 | -13.10339  |
| 19 18 7  | -11.92502  | 11 9 2 2    | 86.14745   | 18 17 10 10 | -6.64617   | 21 21 1 1   | -13.47306  |
| 19 18 8  | -1.67528   | 11 9 3 3    | -22.19429  | 18 17 11 11 | 4.77353    | 21 21 2 1   | 10.18467   |
| 19 19 1  | 33.62581   | 11 9 4 4    | -6.72012   | 18 17 12 12 | 2.48946    | 21 21 2 2   | -27.92553  |
| 19 19 2  | -53.60836  | 11 9 5 5    | -3.32506   | 18 17 13 13 | 1.56487    | 21 21 3 1   | 0.19877    |
| 19 19 3  | 2.24769    | 11 9 6 6    | -8.47596   | 18 17 15 15 | 12.78720   | 21 21 3 2   | -0.92573   |
| 19 19 4  | -10.70020  | 11 9 7 7    | -10.21210  | 18 17 16 16 | -21.38690  | 21 21 3 3   | -1.96864   |
| 19 19 5  | -27.64159  | 11 9 9 9    | -54.21144  | 18 17 17 15 | -3.48831   | 21 21 4 1   | 0.16674    |
| 19 19 6  | -4.83100   | 11 10 1 1   | -10.94665  | 18 17 17 16 | -7.09055   | 21 21 4 2   | 2.17626    |
| 19 19 7  | 18.61729   | 11 10 2 2   | -25.57510  | 18 17 17 17 | -0.31654   | 21 21 4 3   | -2.45042   |
| 20 12 9  | 12.15273   | 11 10 3 3   | 3.45415    | 18 18 1 1   | -48.21175  | 21 21 4 4   | 1.83347    |
| 20 12 10 | -3.68750   | 11 10 4 4   | 1.39106    | 18 18 2 1   | 2.96043    | 21 21 5 1   | -2.16333   |
| 20 12 11 | 1.21757    | 11 10 5 5   | 2.58227    | 18 18 2 2   | -52.52895  | 21 21 5 2   | -0.13429   |
| 20 13 9  | 4.47327    | 11 10 6 6   | 3.75255    | 18 18 3 1   | 1.14037    | 21 21 5 3   | -1.19561   |
| 20 13 10 | 12.80764   | 11 10 7 7   | 3.10871    | 18 18 3 2   | 0.51362    | 21 21 5 4   | -8.99052   |
| 20 14 10 | -6.71682   | 11 10 9 9   | 24.75797   | 18 18 3 3   | -2.98542   | 21 21 5 5   | 7.57358    |
| 20 14 11 | -3.48212   | 11 10 10 9  | 0.54279    | 18 18 4 1   | -1.04374   | 21 21 6 1   | 1.12045    |
| 20 15 1  | 9.36870    | 11 10 10 10 | 22.30648   | 18 18 4 2   | 1.40195    | 21 21 6 2   | -0.43665   |
| 20 15 2  | 2.29651    | 11 11 1 1   | -22.23597  | 18 18 4 3   | 2.83535    | 21 21 6 3   | -4.97961   |
| 20 15 3  | 23.10673   | 11 11 2 1   | 40.71912   | 18 18 4 4   | 2.21641    | 21 21 6 4   | -2.88037   |
| 20 15 4  | -72.02485  | 11 11 2 2   | -78.63811  | 18 18 5 1   | -2.20464   | 21 21 6 5   | -0.89060   |
| 20 15 5  | 99.00294   | 11 11 3 1   | -1.07170   | 18 18 5 3   | 0.99547    | 21 21 6 6   | 11.47144   |
| 20 15 6  | -124.30450 | 11 11 3 2   | -2.21339   | 18 18 5 4   | -8.42173   | 21 21 7 1   | -0.58719   |
| 20 15 7  | -60.00066  | 11 11 3 3   | -11.90358  | 18 18 5 5   | 10.98641   | 21 21 7 2   | 0.63587    |
| 20 15 8  | -65.99321  | 11 11 4 1   | -2.32585   | 18 18 6 1   | -1.13205   | 21 21 7 3   | 7.37058    |
| 20 16 1  | 1.98640    | 11 11 4 2   | 7.88450    | 18 18 6 2   | 0.40589    | 21 21 7 4   | 0.39191    |
| 20 16 2  | 0.74554    | 11 11 4 3   | 5.39765    | 18 18 6 3   | -9.83316   | 21 21 7 5   | 3.92479    |
| 20 16 3  | -5.60276   | 11 11 4 4   | -7.71075   | 18 18 6 4   | 3.00582    | 21 21 7 6   | -7.31844   |
| 20 16 4  | -32.80952  | 11 11 5 1   | -0.95817   | 18 18 6 5   | -6.63959   | 21 21 7 7   | 14.70952   |
| 20 16 5  | 42.69214   | 11 11 5 2   | 2.52505    | 18 18 6 6   | 19.22759   | 21 21 8 1   | -1.23152   |
| 20 16 6  | -13.72948  | 11 11 5 3   | -2.68196   | 18 18 7 1   | -0.78157   | 21 21 8 2   | -0.75803   |
| 20 16 7  | -57.17451  | 11 11 5 4   | -2.61169   | 18 18 7 3   | 5.26076    | 21 21 8 3   | -2.33790   |
| 20 16 8  | -14.08063  | 11 11 5 5   | -3.36160   | 18 18 7 4   | 6.09773    | 21 21 8 4   | -3.84882   |
| 20 17 1  | 40.23549   | 11 11 6 2   | -0.68584   | 18 18 7 5   | -4.56007   | 21 21 8 5   | 6.85459    |
| 20 17 2  | 2.81910    | 11 11 6 3   | -6.98597   | 18 18 7 6   | -4.40883   | 21 21 8 6   | 5.20192    |
| 20 17 3  | -34.84119  | 11 11 6 4   | -2.16952   | 18 18 7 7   | 19.60915   | 21 21 8 7   | 4.50778    |
| 20 17 4  | -8.59001   | 11 11 6 5   | 0.59047    | 18 18 8 1   | -1.37238   | 21 21 8 8   | 6.09695    |
| 20 17 5  | 8.39855    | 11 11 6 6   | 6.30753    | 18 18 8 2   | -0.15769   | 21 21 8 9   | 4.01554    |
| 20 17 6  | 4.38146    | 11 11 7 2   | -0.26481   | 18 18 8 3   | -3.68133   | 21 21 10 9  | -0.97988   |
| 20 17 7  | 17.42925   | 11 11 7 3   | 3.39689    | 18 18 8 4   | 1.10039    | 21 21 10 10 | 1.32945    |
| 20 17 8  | 10.10369   | 11 11 7 4   | 4.35203    | 18 18 8 5   | -0.30074   | 21 21 11 9  | -5.54280   |
| 20 18 1  | -85.78984  | 11 11 7 5   | -1.52670   | 18 18 8 6   | 8.65023    | 21 21 11 10 | 1.02106    |
| 20 18 2  | -70.70656  | 11 11 7 6   | -8.43068   | 18 18 8 7   | 3.96528    | 21 21 11 11 | 3.93043    |
| 20 18 3  | -9.21080   | 11 11 7 7   | 7.41949    | 18 18 8 8   | 4.62350    | 21 21 12 12 | 3.30265    |
| 20 18 4  | 12.84683   | 11 11 8 1   | -0.54500   | 18 18 9 9   | 4.71641    | 21 21 13 12 | 5.11861    |
| 20 18 5  | -19.34781  | 11 11 8 2   | 0.91183    | 18 18 10 9  | 1.53966    | 21 21 13 13 | 8.36274    |
| 20 18 6  | 7.36482    | 11 11 8 3   | -0.46044   | 18 18 10 10 | 14.38297   | 21 21 14 12 | -2.82370   |
| 20 18 7  | -16.40107  | 11 11 8 4   | -0.59962   | 18 18 11 9  | -6.26919   | 21 21 14 13 | 1.53610    |
| 20 18 8  | -26.11582  | 11 11 8 5   | 1.17997    | 18 18 11 10 | 2.41038    | 21 21 14 14 | -4.49281   |

| I  | J  | K  | FI(I,J,K) | I  | J  | K  | L  | FI(I,J,,K,L) | I  | J  | K  | L  | FI(I,J,K,L) | I  | J  | K  | L  | FI(I,J,K,L) |
|----|----|----|-----------|----|----|----|----|--------------|----|----|----|----|-------------|----|----|----|----|-------------|
| 20 | 19 | 1  | -46.11698 | 11 | 11 | 8  | 6  | 3.20950      | 18 | 18 | 11 | 11 | 3.28663     | 21 | 21 | 15 | 15 | -11.01758   |
| 20 | 19 | 2  | 3.19309   | 11 | 11 | 8  | 7  | -2.93152     | 18 | 18 | 12 | 12 | 5.99574     | 21 | 21 | 16 | 15 | 7.85878     |
| 20 | 19 | 3  | -13.00132 | 11 | 11 | 9  | 9  | 60.33081     | 18 | 18 | 13 | 12 | 0.30041     | 21 | 21 | 16 | 16 | -30.53351   |
| 20 | 19 | 4  | 0.67666   | 11 | 11 | 10 | 9  | -14.82116    | 18 | 18 | 13 | 13 | 15.03751    | 21 | 21 | 17 | 15 | 1.11704     |
| 20 | 19 | 5  | -4.80402  | 11 | 11 | 10 | 10 | 9.51010      | 18 | 18 | 14 | 12 | -6.12880    | 21 | 21 | 17 | 16 | -2.60843    |
| 20 | 19 | 6  | -7.73794  | 11 | 11 | 11 | 9  | -47.67516    | 18 | 18 | 14 | 13 | 3.65021     | 21 | 21 | 17 | 17 | 2.58317     |
| 20 | 19 | 7  | -1.21965  | 11 | 11 | 11 | 10 | 16.51133     | 18 | 18 | 14 | 14 | -1.30835    | 21 | 21 | 18 | 15 | 1.26360     |
| 20 | 19 | 8  | -10.53352 | 11 | 11 | 11 | 11 | 48.29941     | 18 | 18 | 15 | 15 | -47.59228   | 21 | 21 | 18 | 16 | 0.38010     |
| 20 | 20 | 1  | 144.84015 | 12 | 12 | 1  | 1  | -96.19517    | 18 | 18 | 16 | 15 | 2.48712     | 21 | 21 | 18 | 18 | 13.27628    |
| 20 | 20 | 2  | 69.31395  | 12 | 12 | 2  | 1  | -1.52903     | 18 | 18 | 16 | 16 | -53.69597   | 21 | 21 | 19 | 15 | 0.12816     |
| 20 | 20 | 3  | -9.81865  | 12 | 12 | 2  | 2  | -97.60171    | 18 | 18 | 17 | 15 | 2.49631     | 21 | 21 | 19 | 16 | -0.24594    |
| 20 | 20 | 4  | 10.53895  | 12 | 12 | 3  | 1  | 2.88717      | 18 | 18 | 17 | 16 | -0.23845    | 21 | 21 | 19 | 17 | -3.60229    |
| 20 | 20 | 5  | -10.03306 | 12 | 12 | 3  | 2  | 2.31474      | 18 | 18 | 17 | 17 | -4.63266    | 21 | 21 | 19 | 18 | -4.57545    |
| 20 | 20 | 6  | -14.69580 | 12 | 12 | 3  | 3  | -4.50578     | 18 | 18 | 18 | 15 | 1.13093     | 21 | 21 | 19 | 19 | 4.76100     |
| 20 | 20 | 7  | -39.72931 | 12 | 12 | 4  | 1  | -5.38291     | 18 | 18 | 18 | 16 | -1.21896    | 21 | 21 | 20 | 15 | -0.56107    |
| 20 | 20 | 8  | -11.48878 | 12 | 12 | 4  | 2  | 4.07665      | 18 | 18 | 18 | 17 | 2.96412     | 21 | 21 | 20 | 16 | -0.16932    |
| 21 | 12 | 10 | -10.55013 | 12 | 12 | 4  | 3  | 2.43853      | 18 | 18 | 18 | 18 | 13.93135    | 21 | 21 | 20 | 17 | -0.40006    |
| 21 | 13 | 9  | 4.47887   | 12 | 12 | 4  | 4  | -2.54572     | 19 | 15 | 1  | 1  | -5.21607    | 21 | 21 | 20 | 18 | 3.46877     |
| 21 | 13 | 10 | -10.74282 | 12 | 12 | 5  | 1  | -3.99058     | 19 | 15 | 2  | 2  | 0.11794     | 21 | 21 | 20 | 19 | -3.33061    |
| 21 | 13 | 11 | -7.79708  | 12 | 12 | 5  | 2  | 2.44232      | 19 | 15 | 3  | 3  | 0.26102     | 21 | 21 | 20 | 20 | 7.79017     |
| 21 | 14 | 9  | -0.74842  | 12 | 12 | 5  | 3  | 2.29861      | 19 | 15 | 4  | 4  | 2.88920     | 21 | 21 | 21 | 15 | 1.26945     |
| 21 | 14 | 10 | 3.75527   | 12 | 12 | 5  | 4  | -4.48690     | 19 | 15 | 5  | 5  | 1.27072     | 21 | 21 | 21 | 17 | -5.91040    |
| 21 | 14 | 11 | 9.00188   | 12 | 12 | 5  | 5  | 3.24903      | 19 | 15 | 6  | 6  | 1.09227     | 21 | 21 | 21 | 18 | 2.84949     |
| 21 | 15 | 1  | 9.41379   | 12 | 12 | 6  | 1  | -3.18854     | 19 | 15 | 9  | 9  | -0.84271    | 21 | 21 | 21 | 19 | 6.44352     |
| 21 | 15 | 2  | 0.86891   | 12 | 12 | 6  | 2  | 0.89045      | 19 | 15 | 10 | 10 | 5.15224     | 21 | 21 | 21 | 20 | 0.85657     |
| 21 | 15 | 3  | -19.79898 | 12 | 12 | 6  | 3  | -7.74332     | 19 | 15 | 11 | 11 | -1.79200    | 21 | 21 | 21 | 21 | 15.04684    |
| 21 | 15 | 4  | 22.34146  | 12 | 12 | 6  | 4  | 2.06962      | 19 | 15 | 12 | 12 | -1.16340    |    |    |    |    |             |
| 21 | 15 | 5  | -31.06283 | 12 | 12 | 6  | 5  | -4.39638     | 19 | 15 | 13 | 13 | 2.22372     |    |    |    |    |             |
